# Supplementary material
Source: HighWire-hosted journal article supplement (doi:10.1101/rna.080781.125)
Supplement: Supplemental_TableS2.xlsx [file Supplemental_TableS2.xlsx]

## Sheet: HRP1_PAS_shifts_updated
count	gene_id	gene_name	strand	M191T_rep1	M191T_rep2	WT_rep1	WT_rep2	h7_rep1	h7_rep2
1	YAL001C	TFC3	-	-33.5349	35.8824	-347.974	-83.3438	17.9697	-117.609
2	YAL002W	VPS8	+	-219.633	-606.872	-655.868	-332.105	-858.867	-516.348
3	YAL003W	EFB1	+	143.674	109.55	88.6181	126.58	126.031	128.959
4	YAL005C	SSA1	-	133.815	131.806	51.9419	143.607	131.445	122.337
5	YAL007C	ERP2	-	146.223	150.331	112.247	145.11	135.4	148.28
6	YAL008W	FUN14	+	126.881	119.908	88.8111	133.429	169.462	130.585
7	YAL009W	SPO7	+	172.422	121.667	119.962	149.167	262.444	130.244
8	YAL010C	MDM10	-	192.533	69.0909	21.9667	144.255	157.241	216.939
9	YAL011W	SWC3	+	143.708	98.7097	44.1818	60.4324	59.5312	101.375
10	YAL012W	CYS3	+	74.9322	87.5978	46.9186	75.371	90.1144	82.0688
11	YAL013W	DEP1	+	90.0141	94.5833	-20.8873	146.121	124.694	116.159
12	YAL014C	SYN8	-	344.8	321.768	283.885	309.218	263.225	220.073
13	YAL015C	NTG1	-	131.07	118.25	22.5342	128.511	90.7451	112.487
14	YAL016W	TPD3	+	60.7234	33.9029	-42.8894	27.9279	29.4508	38.5278
15	YAL017W	PSK1	+	21.1786	11.8143	-3.17647	-214.592	32.6406	17.7551
16	YAL019W	FUN30	+	39.1402	49.6615	-190.711	39.6574	6.75	-6.74046
17	YAL020C	ATS1	-	62.5217	75.6667	-26.3191	70.6327	125.689	122.421
18	YAL021C	CCR4	-	233.206	184.494	-54.7174	102.741	214.87	151.398
19	YAL022C	FUN26	-	42.7677	22.7727	-71.0536	-17.2558	-10.0494	-40.6857
20	YAL023C	PMT2	-	81.3061	101.495	-24.6243	77.3159	44.1133	75.5619
21	YAL024C	LTE1	-	76.2667	95.2	-198.615	-95.1071	-107.667	-556.31
22	YAL025C	MAK16	-	193.678	213.568	171.468	197.526	187.662	188.588
23	YAL026C	DRS2	-	46.764	-40.5682	-359.114	-52.1619	-8.18841	-154.14
24	YAL027W	SAW1	+	73	99.3478	15.3333	95.5263	103.757	86.6
25	YAL028W	FRT2	+	35.4545	34.2727	-43.0526	10.8333	-96.3333	197.571
26	YAL029C	MYO4	-	4.88333	-42.5932	-417.532	-56.4804	-60.331	-125.529
27	YAL030W	SNC1	+	120.647	119.573	96.6562	122.082	111.92	118.452
28	YAL031C	GIP4	-	80.25	53.9677	-297.633	7.23077	-3.25	-60.1
29	YAL032C	PRP45	-	94.3617	112.449	85.1875	107.13	63.1364	120.649
30	YAL033W	POP5	+	75.7835	83.3173	49.9592	85.2476	64.0652	64.9625
31	YAL034C	FUN19	-	115.366	132.41	74.9808	114.983	126.84	97.9111
32	YAL034W-A	MTW1	+	94.375	155.591	92.7	101.846	97.2381	78.5714
33	YAL035W	FUN12	+	56.3312	48.2057	-117.756	42.953	83.3185	26.8536
34	YAL036C	RBG1	-	187.69	195.392	131.266	160.905	172.795	165.339
35	YAL037W	NA	+	339.167	300.591	438.4	469.074	730.294	127.515
36	YAL038W	CDC19	+	132.567	135.255	54.8908	128.454	128.708	129.649
37	YAL039C	CYC3	-	75.5556	63	20.3838	50.392	67.5498	66.4983
38	YAL040C	CLN3	-	83.5858	54.2316	23.3071	89.254	49.1009	98.1713
39	YAL041W	CDC24	+	56.7692	53.8594	-10.9808	3.29091	-75.3438	-37.6
40	YAL042W	ERV46	+	66.2023	73.4523	28.5747	79.8007	70.3631	46.1841
41	YAL043C	PTA1	-	77.2	89.7895	-122.578	37.8511	71.122	81.9057
42	YAL044C	GCV3	-	76.0747	80.0072	62.5666	76.5164	75.6092	79.5493
43	YAL044W-A	BOL1	+	111.135	112.752	99.7333	114.66	115.909	111.445
44	YAL046C	BOL3	-	113.956	115.677	91.8434	118.385	109.141	143.131
45	YAL047C	SPC72	-	260.889	177.76	-7.2	7.71429	42.1905	-40.1364
46	YAL048C	GEM1	-	999.065	976.5	341.433	779.786	773.885	791.739
47	YAL049C	AIM2	-	113.814	112.726	77.8542	117.725	117.446	99.7538
48	YAL051W	OAF1	+	-192.54	-111.643	-118.293	-89.0526	-383.054	-87.5
49	YAL053W	FLC2	+	-1.36136	32.743	-115.122	-1.24455	13.6675	4.25309
50	YAL054C	ACS1	-	148.383	159.963	129.881	152.778	88.3913	109.865
51	YAL055W	PEX22	+	89.4483	86.9	69.1628	100	76.8	90.4138
52	YAL056W	GPB2	+	-30.55	-53.2903	-242.565	-184.131	-190.719	-217.902
53	YAL058W	CNE1	+	467.2	430.875	-45.1356	34.8358	143.711	342.094
54	YAL059W	ECM1	+	167.21	179.96	161.89	177.35	160.551	166.258
55	YAL060W	BDH1	+	78.9281	88.6074	50.3757	53.6944	58.8756	48.2449
56	YAL061W	BDH2	+	753.32	613.188	372.462	414.8	705.174	349.833
57	YAL062W	GDH3	+	130.25	142.231	68.931	84.0323	97.6735	159.968
58	YAL063C	FLO9	-	74.2	79.7273	-50.7273	105	87.0625	-19.8571
59	YAL064W-B	NA	+	2904.69	3042.89	2231.6	2961.18	2547.1	2119.85
60	YAL067C	SEO1	-	139.242	88.25	45.1852	186.026	144.5	199.5
61	YAR002C-A	ERP1	-	98.6487	100.804	76.0607	100.842	127.167	125.174
62	YAR002W	NUP60	+	100.908	75.4	-29.3947	85.9167	59.6375	29.9464
63	YAR003W	SWD1	+	235.5	202.787	119.946	195.367	126.737	80.45
64	YAR007C	RFA1	-	134.361	45.6374	17.4468	76.5833	69.0595	7.01389
65	YAR008W	SEN34	+	118.636	99.1875	37.0909	81.5938	62.1471	97.8205
66	YAR014C	BUD14	-	156.687	145.674	6.18254	137.218	126.47	145.172
67	YAR015W	ADE1	+	108.716	121.925	103.455	139.06	124.235	122.258
68	YAR018C	KIN3	-	122.155	104.493	93.7656	109.746	75.5952	84.0294
69	YAR019C	CDC15	-	-102.406	-148.5	-231.628	-249.895	12.35	-44.6538
70	YAR023C	DFP1	-	486.3	1133.46	563.556	742.364	996.278	983.733
71	YAR027W	UIP3	+	226.776	216.566	162.878	121.652	139.972	130.468
72	YAR028W	KTD1	+	531.222	613.489	280.167	246.397	433.5	396.6
73	YAR031W	PRM9	+	264.571	173.344	119.652	133.764	293.5	349.154
74	YAR033W	MST28	+	161.045	173.762	192.463	164.171	188.806	189.759
75	YAR035W	YAT1	+	91.68	169.815	129.133	-63.9231	128.673	3.17544
76	YAR042W	SWH1	+	666.444	458.658	222.434	72.3571	592.124	488.873
77	YAR050W	FLO1	+	-4.19685	-138.466	-291.095	-50.3256	-48.1239	-246.88
78	YAR071W	PHO11	+	39.5541	39.9506	46.3953	43.7536	52.1702	62.4328
79	YBL001C	ECM15	-	121.814	132.459	78.1195	86.2433	125.367	130.245
80	YBL002W	HTB2	+	207.612	206.865	192.984	205.516	209.569	206.739
81	YBL003C	HTA2	-	179.142	181.358	152.289	173.719	187.026	182.419
82	YBL004W	UTP20	+	-234.778	-289.577	-729.826	-244.25	-406.01	-709.826
83	YBL005W	PDR3	+	101.478	-125.812	-310.346	192.844	-246.211	-159.567
84	YBL006C	LDB7	-	894.94	1180.43	504.438	804.827	781.868	690.047
85	YBL007C	SLA1	-	51.0179	89.3817	-209.664	-48.584	35.8942	22.0105
86	YBL008W	HIR1	+	55.3077	-10.6585	-153.364	-73.5814	-56.4194	-205.893
87	YBL008W-A	NA	+	2245.6	2552.27	1778.25	2083.5	2144.5	1910.2
88	YBL009W	ALK2	+	86.5435	53.1321	18.2632	80.2	122.971	28.9143
89	YBL010C	LAA2	-	208.278	189.65	166.458	200.476	231.926	228.067
90	YBL011W	SCT1	+	46.6134	51.3784	-0.4	-35.1556	-11.1176	37.8526
91	YBL014C	RRN6	-	87.3571	63.3968	-86.6786	56.5116	143.418	67.3871
92	YBL015W	ACH1	+	202.679	230.847	77.2714	244.933	217.769	228.13
93	YBL016W	FUS3	+	132.418	168.202	22.5447	68.5895	116.219	130.289
94	YBL017C	PEP1	-	-43.8077	-88.0132	-461.277	-143.643	-90.7842	-124.778
95	YBL018C	POP8	-	203.978	145.286	133.619	120.986	139.947	78.3239
96	YBL019W	APN2	+	115.526	136.5	-16.1429	133.5	-91.0952	132.727
97	YBL020W	RFT1	+	60.6395	25.2903	-7.01333	0.649351	41.9143	-10.3455
98	YBL021C	HAP3	-	151.185	172.944	146.577	268.957	158	149.5
99	YBL022C	PIM1	-	68.0168	13.3667	-242.45	-84.6018	5.96129	32.7756
100	YBL023C	MCM2	-	94.7564	112.616	-55.9014	98.3134	151.222	13.614
101	YBL024W	NCL1	+	131.628	128.566	68.8419	114.907	104	120.215
102	YBL025W	RRN10	+	584.646	461.769	384.452	410.154	443.1	424.043
103	YBL026W	LSM2	+	258.763	204.293	201.861	195.92	208.631	204.585
104	YBL027W	RPL19B	+	88.2908	91.7492	65.4125	90.6049	94.8352	90.4593
105	YBL028C	NA	-	217.091	200.756	181.536	195.817	186.086	177.964
106	YBL029C-A	NA	-	129.517	110.86	120.086	132.889	89.8082	117.534
107	YBL029W	NA	+	-185.75	-332.457	-178	-134.15	-19.5435	-100.159
108	YBL030C	PET9	-	262.236	258.735	209.33	256.038	250.768	252.034
109	YBL031W	SHE1	+	94.1176	128.714	53.2	149.3	147.583	164.25
110	YBL032W	HEK2	+	175	177.704	70.6148	138.19	172.213	146.163
111	YBL033C	RIB1	-	122.643	73.178	38.4821	70.2252	109.127	65.3615
112	YBL034C	STU1	-	-137.065	-150.158	-670.462	-208.1	-268.861	-681.727
113	YBL035C	POL12	-	62.3333	68.4737	23.875	34	20.6842	81.0656
114	YBL036C	NA	-	137.503	135.812	80.625	120.747	126.423	128.655
115	YBL037W	APL3	+	-142.804	-239.87	-332.962	-239.475	-705.81	-552.067
116	YBL038W	MRPL16	+	150	77.6462	51.5844	83.2281	72.75	74.0779
117	YBL039C	URA7	-	123.305	111.922	17.477	112.251	96.2522	108.169
118	YBL039W-B	MIN6	+	132.767	133.677	132.974	129.84	127.833	131.947
119	YBL040C	ERD2	-	99.4277	100.976	57.9935	86.3014	89.0406	85.1379
120	YBL041W	PRE7	+	93.4045	78.9241	70.4554	80.0466	82.7798	85.6345
121	YBL042C	FUI1	-	146.839	138.132	33.6382	131.498	108.116	105.712
122	YBL043W	ECM13	+	139.625	169.61	127.794	127.9	65.4167	114.429
123	YBL045C	COR1	-	217.359	208.802	114.926	189.619	224.128	195.444
124	YBL046W	PSY4	+	162.946	131.632	127.153	140.604	94.806	98.1373
125	YBL047C	EDE1	-	144	201.419	-99.9859	201.554	219.37	444.164
126	YBL049W	MOH1	+	214.045	239.682	204.037	254	265.866	230.759
127	YBL050W	SEC17	+	58.9114	45.1733	7.23353	40.1688	34.3939	49.7941
128	YBL051C	PIN4	-	264.691	283.615	141.855	220.602	268.171	278.253
129	YBL052C	SAS3	-	-51.6154	-24.5	-258.143	-55.9	-128.222	-301.381
130	YBL054W	TOD6	+	153.389	118.151	98.0168	114.034	101.928	128.368
131	YBL055C	NA	-	81.9746	106.387	19.3197	81.0891	119.18	106.865
132	YBL056W	PTC3	+	289.633	301.165	163.491	299.569	275.291	311.426
133	YBL057C	PTH2	-	77.1791	79.0887	41.3782	68.5043	67.7077	67.8737
134	YBL058W	SHP1	+	95.0345	64.5324	-19.9556	98.5345	61.4025	54.704
135	YBL059C-A	CMC2	-	199.411	197.406	173.826	182.239	177.573	194.173
136	YBL059W	IAI11	+	71.7727	59.1538	38.7778	47.3571	48.8333	46.4286
137	YBL060W	YEL1	+	9.23077	-310.686	-286.359	-255.393	-206.652	-151.964
138	YBL061C	SKT5	-	150.903	80.0075	-144.048	64.45	33.7377	5.02703
139	YBL063W	KIP1	+	-247.75	36.0526	-1044	-114.56	-360.105	-184.778
140	YBL064C	PRX1	-	54.0325	59.6814	-16.16	38.1069	48.7714	37.6898
141	YBL066C	SEF1	-	294.882	135.676	-176.189	30.625	-156.097	-133.371
142	YBL067C	UBP13	-	60.9794	25.2991	-112.49	41.0988	20.1753	47.5405
143	YBL068W	PRS4	+	110.193	123.213	55.6199	98.0565	106.18	119.139
144	YBL069W	AST1	+	93.3636	58.8588	72.8067	80.0405	91.8279	53.824
145	YBL071W-A	KTI11	+	659.347	650.612	647.245	699.574	688.503	645.032
146	YBL072C	RPS8A	-	133.372	140.79	134.153	149.546	166.025	158.093
147	YBL074C	AAR2	-	1999.82	2132.5	1216.22	1534.5	1798.5	1980.76
148	YBL075C	SSA3	-	925.167	126.516	-137.486	581.724	347.393	493.393
149	YBL076C	ILS1	-	65.4807	26.58	-176.04	4.7364	-39.0635	-19.5736
150	YBL078C	ATG8	-	321.196	316.812	332.717	351.595	317.776	301.361
151	YBL079W	NUP170	+	13.6967	-40.4384	-462.619	-142.604	-217.823	-154.579
152	YBL080C	PET112	-	103.833	2.76923	-8	93.0769	38.1053	88.6667
153	YBL081W	NA	+	168.368	108.589	71.6543	100.85	118.554	80.988
154	YBL082C	ALG3	-	60.7404	75.8319	-23.3017	62.4747	60.9451	62.0127
155	YBL084C	CDC27	-	-719	-606.775	-171.258	-318.378	-526.733	-734.394
156	YBL085W	BOI1	+	14.8293	52.1923	-114.855	22.6575	-120.495	-89.5417
157	YBL086C	NA	-	14.0286	37.7419	-67.2895	48.05	1.81395	26.7222
158	YBL087C	RPL23A	-	96.0763	95.9705	81.6254	97.0073	91.9254	98.1781
159	YBL088C	TEL1	-	-1212.35	-1281.91	-2015.11	-2069.06	-1130.33	-1260.77
160	YBL089W	AVT5	+	-50	7.375	15.5143	-113.348	-170.969	-35.6
161	YBL090W	MRP21	+	502.969	379.537	402.787	518.678	318.536	366.551
162	YBL091C	MAP2	-	193.894	172.109	115.776	213.419	261.139	184.484
163	YBL091C-A	SCS22	-	130.939	117.96	93.0488	134.756	129.128	32.2941
164	YBL092W	RPL32	+	92.9695	92.7862	93.3622	94.4082	100.276	101.501
165	YBL093C	ROX3	-	181.776	165.867	119.824	162.741	180.465	195.163
166	YBL095W	MRX3	+	99.3714	118.92	-8.71429	82.878	83.3488	98.0833
167	YBL097W	BRN1	+	819.958	612.2	568.708	701.143	343.737	465.4
168	YBL098W	BNA4	+	57.8108	46.125	-11.0656	-16.0588	21.5965	49.9804
169	YBL099W	ATP1	+	169.979	194.123	77.5976	163.612	149.749	166.432
170	YBL100W-C	NA	+	548.143	509	476.667	350	557.882	430
171	YBL101C	ECM21	-	-54.8617	-162.547	-407.071	-154.108	-127	-42.2791
172	YBL102W	SFT2	+	172.847	167.582	138.961	161.509	177.802	179.856
173	YBL103C	RTG3	-	294.571	314.745	229.676	334.061	306.358	299.429
174	YBL104C	SEA4	-	32.425	-25.1714	-277.044	-131.333	-21	-96.1351
175	YBL105C	PKC1	-	58.0541	84.2574	-215.036	131.258	99.4253	-184.771
176	YBL106C	SRO77	-	230.231	158.176	-127.091	57.32	135.5	381.5
177	YBL107C	MIX23	-	98.6322	115.348	101.07	101.463	109.183	100.979
178	YBL111C	NA	-	2136.25	2488.36	2704.86	2334.54	2681.13	2465.47
179	YBL112C	NA	-	2305.14	2350.73	2379.86	2381.5	2376.76	2373.41
180	YBL113C	NA	-	-14.7941	60.8485	-105.5	64	46.075	53.52
181	YBR001C	NTH2	-	37.0943	-112.5	-248.574	-53.1282	-130.134	-54.3529
182	YBR002C	RER2	-	148.149	152.657	133	154.359	180.269	110.27
183	YBR003W	COQ1	+	16.2292	34.2075	-35.5	61.84	1.37097	40.0189
184	YBR004C	GPI18	-	7.80447	12.175	-70.1701	14.7297	-61.9594	-56.973
185	YBR005W	RCR1	+	152.801	177.099	124.749	161.89	158.172	158.21
186	YBR006W	UGA2	+	102.457	131.729	30.4815	67.1957	128.436	92.8333
187	YBR007C	DSF2	-	152.466	170.485	-59.2182	40.0645	52.44	74.8438
188	YBR008C	FLR1	-	170.235	54.1111	120.083	137.321	352.069	93.9524
189	YBR009C	HHF1	-	214.324	225.684	222.932	238.651	267.711	253.344
190	YBR010W	HHT1	+	145.861	144.335	126.5	146.518	150.78	151.432
191	YBR011C	IPP1	-	103.6	101.141	52.6518	102.437	103.495	108.151
192	YBR014C	GRX7	-	117.831	135.941	97.9381	127.259	141.69	135.851
193	YBR015C	MNN2	-	120.066	124.899	0.125561	110.247	56.265	101.317
194	YBR016W	CPP1	+	210.693	221.278	208.424	208.185	211.693	217.139
195	YBR017C	KAP104	-	98.5	40.0059	-79.5714	23.2	49.8456	-25.7483
196	YBR018C	GAL7	-	186.5	156.5	121.714	157.2	20.3846	136.333
197	YBR019C	GAL10	-	211.389	275.364	16.7857	48.1429	257.231	110
198	YBR020W	GAL1	+	2327	1827	964.333	982.235	1316.76	1651.07
199	YBR021W	FUR4	+	109.852	63.7414	28.7838	147.128	40.5333	46.5818
200	YBR022W	POA1	+	136.086	146.364	130.667	141.061	142.771	68.25
201	YBR023C	CHS3	-	14.114	59.6564	-207.914	11.2932	-105.684	-82.3057
202	YBR024W	SCO2	+	218.368	250.565	217.294	169.675	176.892	228.333
203	YBR025C	OLA1	-	186.39	181.717	106.174	164.975	184.547	177.384
204	YBR026C	ETR1	-	122.385	117.385	9.84685	109.772	114.368	108.172
205	YBR027C	NA	-	816.6	519.5	992	915	1098.5	1249
206	YBR028C	YPK3	-	173.884	101.322	206.346	118.944	142.293	99.2414
207	YBR029C	CDS1	-	102.012	98.1307	42.773	111.669	105.098	83.3551
208	YBR030W	RKM3	+	136.373	76	-113.577	132.214	92.6	131.468
209	YBR031W	RPL4A	+	83.2734	86.8046	61.4141	84.1757	84.5247	82.4242
210	YBR033W	EDS1	+	-311.7	47.3	-140.333	-184.75	-209.9	-617
211	YBR034C	HMT1	-	221.134	227.367	126.01	170.75	263.629	192.535
212	YBR035C	PDX3	-	112	113.393	78.3412	105.706	111.955	117.217
213	YBR036C	CSG2	-	172.765	159.261	87.8019	157.379	169.947	133.016
214	YBR037C	SCO1	-	16.6111	89.8571	26.0857	64.5217	42.3871	-1.95652
215	YBR038W	CHS2	+	3.67308	45.3457	-72.8269	77.3171	76.058	-21.3273
216	YBR039W	ATP3	+	185.762	168.361	114.743	167.147	173.337	161.374
217	YBR041W	FAT1	+	70.8793	40.3019	-177.268	99.413	51.2973	37.514
218	YBR042C	CST26	-	22.1735	105	-5.78161	64.6632	-14.3333	74
219	YBR043C	QDR3	-	107.535	153.385	-152.672	-52.7	19.25	27.0488
220	YBR044C	TCM62	-	-68.4118	-20.375	-198.97	-129.667	-236.5	-105.64
221	YBR045C	GIP1	-	126	131.875	110.533	261.6	112.111	332.625
222	YBR046C	ZTA1	-	253.394	191.609	212.518	229	232.876	245.167
223	YBR047W	FMP23	+	131.522	93.4865	73.6935	89.8085	105.164	86.9796
224	YBR048W	RPS11B	+	205.157	208.432	185.6	205.278	204.606	201.244
225	YBR049C	REB1	-	167.455	172.405	107.629	224.72	195.41	117.718
226	YBR050C	REG2	-	17.75	-3.04348	-48.9688	19.8333	-47	35.2778
227	YBR052C	RFS1	-	84.5463	72.5196	34.5795	97.9078	85.7926	74.777
228	YBR053C	NA	-	825.172	656.867	691.253	737.543	757.514	717.098
229	YBR054W	YRO2	+	373.015	365.876	328.77	358.32	350.189	338.645
230	YBR055C	PRP6	-	-0.380952	66.6129	-144.705	-96.4182	-11.5294	-2.30189
231	YBR056W	MRX18	+	3.59459	34.6042	-32.4375	49.0444	82.8909	12.8036
232	YBR056W-A	MNC1	+	421.786	428.102	406.15	429.369	418.156	408.711
233	YBR057C	MUM2	-	126.65	120.047	40.0455	57.66	127	150.619
234	YBR058C	UBP14	-	539.816	658.918	546.058	628.712	668.5	671.806
235	YBR058C-A	TSC3	-	327.841	331.41	306.95	336.169	380.62	313.683
236	YBR059C	AKL1	-	-57.3611	-19.7013	-243.387	34.6709	-45.3853	-30.7683
237	YBR060C	ORC2	-	51.75	16.3214	-113.067	6.72	16.9057	150.719
238	YBR061C	TRM7	-	174.188	137.078	128	138.692	123.407	131.266
239	YBR062C	NA	-	139.295	99.8085	84.4824	123.861	142.637	83.2121
240	YBR063C	CNM1	-	197.792	124.412	137.611	336.562	359.727	15.1053
241	YBR065C	ECM2	-	1215.1	928.361	817.469	1227.58	881.814	917.902
242	YBR066C	NRG2	-	118.233	84.5741	52.6066	113.966	93.1	64.675
243	YBR067C	TIP1	-	117.641	113.218	93.349	109.36	114.587	114.603
244	YBR068C	BAP2	-	-154.913	-118.133	-118.931	-47.8374	-227.33	-244.233
245	YBR069C	TAT1	-	150.525	108.776	-24.502	58.3205	92.7419	127.714
246	YBR070C	ALG14	-	63	84.661	0.532258	40.2097	97.9016	63.2333
247	YBR071W	NA	+	256.784	275.468	213.5	253.291	261.911	238.341
248	YBR072W	HSP26	+	175.74	152.81	138.898	197.206	149.521	157.107
249	YBR073W	RDH54	+	71.5122	24.6327	-169.909	32.1158	-5.64662	1.80172
250	YBR074W	PFF1	+	-23.8916	-58.9255	-257.55	-60.6882	-21.7526	-32.75
251	YBR076W	ECM8	+	210.8	466	313.778	224	125.8	326.4
252	YBR077C	SLM4	-	249.787	273.667	252.61	330.485	229.171	222.221
253	YBR078W	ECM33	+	249.84	236.696	164.693	222.702	235.983	249.253
254	YBR079C	RPG1	-	52.5074	29.946	-126.324	30.5755	38.5486	36.7659
255	YBR080C	SEC18	-	69.771	116.612	-37.6259	43.3071	39.9935	96.2774
256	YBR081C	SPT7	-	32.9091	-94.2267	-370.062	-22.8909	-196.667	-137.667
257	YBR082C	UBC4	-	153.864	152.793	147.182	153.28	149.889	152.475
258	YBR083W	TEC1	+	57.8547	46.4564	-35.4964	41.4867	24.6258	-6.71094
259	YBR084C-A	RPL19A	-	88.0025	89.3385	70.5499	88.3132	86.6963	86.7009
260	YBR084W	MIS1	+	102.248	51.438	-149.917	83.8623	97.9945	63.4836
261	YBR085C-A	NA	-	358.317	347.47	329.841	344.661	347.437	346.992
262	YBR085W	AAC3	+	250.056	237	109.75	191.167	209.333	246.167
263	YBR086C	IST2	-	-49.8297	8.54275	-81.3154	60.5057	-90.5161	-107.379
264	YBR087W	RFC5	+	55.1226	59.8286	15.1327	55.1351	59.3265	22.6168
265	YBR088C	POL30	-	74.583	75.0266	52.7723	64.4826	74.5133	86.4829
266	YBR089C-A	NHP6B	-	172.854	170.59	169.151	169.099	173.526	174.799
267	YBR090C	NA	-	265.899	273.509	286.123	295.317	270.252	282.321
268	YBR091C	TIM12	-	104.451	110.337	91.087	109.805	95.5275	117.658
269	YBR092C	PHO3	-	29.2752	49.0082	-11.055	52.3581	41.2104	18.2253
270	YBR093C	PHO5	-	55.25	101.443	6.18062	46.5935	42.2905	50.0489
271	YBR094W	PBY1	+	21.7547	81.0455	-87.169	-107.873	-2.14035	-19.6438
272	YBR095C	RXT2	-	76.5238	95.1765	12.5263	14.7838	40.5273	33.54
273	YBR096W	NA	+	276.07	285	307.5	315.355	177.586	163.166
274	YBR097W	VPS15	+	-209.28	-272.077	-967.194	-217.71	-1033	-804.706
275	YBR098W	MMS4	+	196.562	287.067	225.8	104.176	79.1875	62.3077
276	YBR101C	FES1	-	194.231	163.537	39.9444	73.9383	130.593	179.407
277	YBR102C	EXO84	-	237.951	345.333	-125.095	77.2857	112.63	102.714
278	YBR103W	SIF2	+	49.8	57.4872	-51.2581	32.7273	56.875	49.4138
279	YBR104W	YMC2	+	83.25	110.735	60.4194	74.0473	78.3529	72.9783
280	YBR105C	VID24	-	147.885	131.857	104.673	120.061	131.067	119.915
281	YBR106W	SND3	+	160.702	150.659	128.109	149.664	142.421	146.219
282	YBR107C	IML3	-	420.067	407.444	291.96	398.407	387.789	398.417
283	YBR108W	AIM3	+	171.025	159.286	-164.36	135.024	20.4038	88.9773
284	YBR109C	CMD1	-	200.2	200.333	178.232	194.173	200.471	197.019
285	YBR110W	ALG1	+	114.824	185.023	2.27826	83.7333	155.819	92.4945
286	YBR111C	YSA1	-	181.858	234.645	28.1698	84.6403	272.881	294.617
287	YBR111W-A	SUS1	+	160.522	157.224	145.25	157.969	147.637	148.519
288	YBR112C	CYC8	-	132.993	-84.1159	-56.5833	41.2169	-14.8993	-66.6933
289	YBR114W	RAD16	+	8.8046	-1.17722	-212.773	-1.89362	-81.4902	34.6962
290	YBR115C	LYS2	-	-28.1411	11.5373	-345.283	9.18382	-110.552	-36.6393
291	YBR118W	TEF2	+	74.3861	76.5514	28.596	77.8398	72.1897	73.9223
292	YBR119W	MUD1	+	229.419	322.568	184.652	295.393	222.984	192.409
293	YBR120C	CBP6	-	71.9062	74.6216	43.3095	49.7179	92.7547	61.1579
294	YBR121C	GRS1	-	82.4396	83.7179	-31.7173	81.6793	75.7974	81.8406
295	YBR122C	MRPL36	-	184.758	196.435	150.085	156.425	170.981	184.365
296	YBR123C	TFC1	-	35.0278	66.5676	-104.188	-84.6	22.4375	9.77778
297	YBR125C	PTC4	-	212.333	163.797	137.175	138.581	147.735	160.386
298	YBR126C	TPS1	-	100.613	103.341	49.44	86.5667	88.3313	99.5208
299	YBR126W-A	MEO1	+	146.857	145.612	140.282	144.546	147.188	144.432
300	YBR127C	VMA2	-	156.253	169.552	73.0541	152.635	156.875	159.225
301	YBR128C	ATG14	-	295.5	-167.667	-166.385	-110.091	-93.6667	117.583
302	YBR129C	OPY1	-	170.333	131.356	57.6429	108.78	84.7347	89.9714
303	YBR130C	SHE3	-	122.972	58.2159	-19.0926	65.6316	116.732	63.8
304	YBR131W	CCZ1	+	109.808	217.192	51.0455	-97.375	51.9643	244.571
305	YBR132C	AGP2	-	142.049	158.4	-143.385	-92.9268	92.7273	99.4
306	YBR133C	HSL7	-	358.12	291.338	487.043	354.02	784.078	236.853
307	YBR135W	CKS1	+	161.587	161.236	182.761	184.214	166.765	226.948
308	YBR136W	MEC1	+	-344.158	-143.2	-1403.34	-204.261	-692.267	-237.35
309	YBR137W	NA	+	131.739	162.773	96.0667	138.078	139.34	153.19
310	YBR138C	NA	-	137.25	121.033	-36.8824	127.816	152.458	139.429
311	YBR139W	ATG42	+	132.946	89.7778	-21.2545	91.41	76.3333	38.4839
312	YBR140C	IRA1	-	-1013.67	-820.786	-1765.19	-489.389	-1142.82	-968.375
313	YBR141C	BMT2	-	970.258	1520.79	1133.21	2272.63	1667.25	1471.77
314	YBR142W	MAK5	+	151.031	115.413	-17.7947	106.079	105.994	83.2483
315	YBR143C	SUP45	-	141.837	135.021	59.2667	144.473	135.655	153.946
316	YBR145W	ADH5	+	89.6638	78.5326	18.5763	74.8623	77.57	45.4096
317	YBR146W	MRPS9	+	354.258	298.504	289.259	436.018	419.417	279.504
318	YBR147W	RTC2	+	137.688	149.918	50.4205	42.4421	81.3564	92.0517
319	YBR148W	YSW1	+	78.1111	87.3333	94.125	242.222	-64.8	87
320	YBR149W	ARA1	+	134.579	118.868	53.1368	112.575	138.164	129.205
321	YBR150C	TBS1	-	-212.63	-282.458	-597.186	-138.382	-420.407	-534.364
322	YBR151W	APD1	+	133.652	144.765	81.4904	112.464	144.051	159.006
323	YBR152W	SPP381	+	967.812	979.611	1000.45	983.857	997.059	929.389
324	YBR153W	RIB7	+	179.07	162.571	143.143	189.545	141.5	121.154
325	YBR154C	RPB5	-	87.252	95.0102	71.9974	89.379	87.6468	90.4557
326	YBR155W	CNS1	+	128.737	90.4958	62.5492	82.1231	118.902	103.873
327	YBR156C	SLI15	-	102.024	168.342	115.9	106.655	109.641	150.25
328	YBR157C	ICS2	-	297	72.0833	224.176	442.933	296.214	355.2
329	YBR158W	AMN1	+	104.498	96.3636	10.2438	50.7073	15.2951	-53.1972
330	YBR159W	IFA38	+	88.694	92.0198	44.9831	96.1863	98.7189	88.9116
331	YBR160W	CDC28	+	192.343	163.636	124.559	225.856	139.875	137.653
332	YBR161W	CSH1	+	116.591	178	9.64286	157	116.286	123
333	YBR162C	TOS1	-	269.871	276.71	201.081	285.401	262.351	261.509
334	YBR162W-A	YSY6	+	111.05	99.4295	86.2078	91.6085	107.042	97.3681
335	YBR163W	EXO5	+	133.667	127.83	-69.8049	27.5122	-6.36111	59.871
336	YBR164C	ARL1	-	157.402	156.88	128.425	160.498	153.058	172.665
337	YBR165W	UBS1	+	125.458	147.659	127.738	129.634	131.942	140.408
338	YBR166C	TYR1	-	6.8	6.21014	-46.7477	-9.41753	-4.77654	27.2878
339	YBR167C	POP7	-	101	79.4754	58.3188	73.3	74.6667	80.5
340	YBR168W	PEX32	+	86.8974	156.226	98.973	112	86.2	196.893
341	YBR169C	SSE2	-	144.618	130.404	72.9818	54.617	109.254	173.54
342	YBR170C	NPL4	-	132.803	428.121	-11.2329	109.912	183.167	135.787
343	YBR171W	SEC66	+	112.498	115.421	87.6705	108.935	97.6552	112.995
344	YBR172C	SMY2	-	103.007	103.714	-40.5827	84.8487	88.9504	99.7692
345	YBR173C	UMP1	-	178.047	186.858	145.926	156.285	172.248	170.043
346	YBR175W	SWD3	+	106.867	118.043	43.7097	49.0286	65.9697	89.1212
347	YBR176W	ECM31	+	113.48	133.71	99.4167	87.4	114.896	114.711
348	YBR177C	EHT1	-	169.648	97.9107	30.7614	75.3023	147.233	129.19
349	YBR179C	FZO1	-	102.132	34.1842	-75.1026	-139.5	-53.2642	25.125
350	YBR180W	DTR1	+	74	106.75	71.6923	82.1667	94.1667	54.3333
351	YBR181C	RPS6B	-	81.5246	83.8238	51.0533	81.7206	80.9628	79.8979
352	YBR182C	SMP1	-	241.246	283.438	175.455	236.32	217.14	346.688
353	YBR182C-A	NA	-	1831.9	1850.92	1649	1899.89	1435.6	1398.29
354	YBR183W	YPC1	+	70.8689	70.6197	-0.254545	35.088	55.7821	41.6944
355	YBR185C	MBA1	-	150.85	145.188	120.7	123.667	118.556	126.448
356	YBR187W	GDT1	+	134.465	139.794	112.532	144.193	133.852	131.379
357	YBR188C	NTC20	-	283.381	232.205	214.711	205.5	240.311	186.552
358	YBR189W	RPS9B	+	58.563	63.2655	34.4498	56.2526	59.9127	60.6637
359	YBR191W	RPL21A	+	108.494	112.716	93.3339	109.095	111.715	109.489
360	YBR192W	RIM2	+	170.254	188.738	93	179.243	158.587	179.045
361	YBR193C	MED8	-	301.556	299.016	290.431	288.818	287.022	255.927
362	YBR194W	AIM4	+	176.367	158.914	181.891	214.533	162.5	179.857
363	YBR195C	MSI1	-	131.381	123	-5.75	70.2609	134.69	100.833
364	YBR196C	PGI1	-	126.68	137.204	49.0712	119.731	125.708	130.077
365	YBR196C-A	NA	-	1703.94	1855.58	1567.78	1851.4	1762.13	1612.71
366	YBR196C-B	NA	-	1012.75	797.143	423.25	1868.8	406.75	920
367	YBR197C	NA	-	601.328	614.714	508.317	893.275	570.59	504.979
368	YBR198C	TAF5	-	58.5851	25.23	-239.647	13.7241	-52.9753	-86.5588
369	YBR199W	KTR4	+	219.602	167.642	57.5584	150.921	233.333	197.84
370	YBR200W	BEM1	+	225.118	229.091	80.5714	207.232	214.654	126.436
371	YBR201C-A	MIN7	-	299.5	242	256.639	237.833	237.433	244.355
372	YBR201W	DER1	+	273.657	139.923	80.3148	114.852	170.5	168.627
373	YBR202W	MCM7	+	134.764	57.9889	-101.239	30.6931	1.69565	78.6984
374	YBR203W	COS111	+	26.7419	-132.311	-380.378	-423	-208.979	-8.37681
375	YBR204C	LDH1	-	184.326	193.625	118.521	175.562	162.8	182.951
376	YBR205W	KTR3	+	122.909	121.41	64.7579	107.532	111.727	108.314
377	YBR207W	FTH1	+	76.5096	70.024	39.5833	94.7619	92.2065	68.2569
378	YBR208C	DUR12	-	14.3158	53.1695	-444.551	-238.022	3.08	-43.5122
379	YBR210W	ERV15	+	210.706	202.77	168.229	179.037	203.921	171.678
380	YBR211C	AME1	-	147.333	121.944	43.2778	105.282	113.595	31.7812
381	YBR212W	NGR1	+	159.484	144.642	60.252	106.021	129.36	113.169
382	YBR213W	MET8	+	803.754	1078.26	868.681	919.385	1073.67	1060.91
383	YBR214W	SDS24	+	156.255	115.34	51.9167	104.361	157.467	95.0759
384	YBR215W	HPC2	+	170.865	102.417	41.5781	179.646	222.958	129.789
385	YBR216C	YBP1	-	443.405	406.314	-44.413	214.3	364.887	84.093
386	YBR217W	ATG12	+	279.731	231.222	273.724	251.192	338.571	312.44
387	YBR218C	PYC2	-	91.7726	90.5349	-188.738	59.8687	44.7019	50.2405
388	YBR219C	NA	-	-348.647	-348.75	-354.05	-142.957	-339.118	-339.211
389	YBR220C	NA	-	72.6757	88.775	47.2462	160.559	118.046	130.455
390	YBR221C	PDB1	-	224.134	220.605	167.073	227.109	211.063	216.727
391	YBR222C	PCS60	-	87.8468	109.163	-8.02632	89.0833	91.2372	89.582
392	YBR223C	TDP1	-	406	337.414	183.756	283.237	419.75	133.786
393	YBR225W	NA	+	-112.756	56.1471	-242.162	-26.1176	-38.0667	-46.4074
394	YBR227C	MCX1	-	22.25	34.7234	-101.928	86.463	57.9787	57.359
395	YBR228W	SLX1	+	387.03	210.926	16.037	116.735	141.552	130.828
396	YBR229C	ROT2	-	94.0526	72.1081	-213.729	105.754	31.0943	6.29091
397	YBR230C	OM14	-	95.6861	93.3256	88.4489	90.5671	87.3682	84.5752
398	YBR230W-A	COQ21	+	122.929	128	118.523	127.697	131.265	129.218
399	YBR231C	SWC5	-	102.885	50.234	1.61364	42.4524	31.3269	43.3958
400	YBR233W	PBP2	+	111.585	142.263	95.7857	116.562	182.31	57.48
401	YBR233W-A	DAD3	+	224.308	213.486	210.471	198.8	204.656	182.84
402	YBR234C	ARC40	-	44.8205	50.5792	-16.8865	54.1	48.3321	36.2179
403	YBR235W	VHC1	+	43.3846	30.4324	-197.859	67.9474	8.48333	17.62
404	YBR236C	ABD1	-	168.575	191.893	67.957	117.487	131.342	168.567
405	YBR237W	PRP5	+	47.2	-75.6129	-175.571	-95.4	-56.7714	-22.25
406	YBR238C	NA	-	385.308	403.35	268.49	394.297	290.855	295.088
407	YBR239C	ERT1	-	71.8043	84.6176	-57.2	-57.5918	72.0893	15.2895
408	YBR240C	THI2	-	330.143	192.333	116.231	102.625	200.588	188.308
409	YBR241C	VVS1	-	21.6	53.8929	-41.9474	37.9615	61.6364	85.1
410	YBR242W	NA	+	83.298	79.7143	55.4556	79.1146	90.2979	59.6154
411	YBR243C	ALG7	-	17.5968	71.2222	47.125	117.818	74	143.061
412	YBR244W	GPX2	+	117.488	120.978	91.45	114.358	141.286	122.904
413	YBR245C	ISW1	-	113.253	73.9375	-157.229	-48.4891	-20.1509	-42.5349
414	YBR246W	RRT2	+	93.898	102.953	28.75	100.851	92.5294	139.237
415	YBR247C	ENP1	-	152.183	189.629	36.403	118.993	124.931	111.118
416	YBR248C	HIS7	-	94.7543	75.0134	-32.621	58.4468	43.2346	71.6636
417	YBR249C	ARO4	-	115.842	122.241	63.4947	101.771	115.906	105.235
418	YBR251W	MRPS5	+	100.326	66.0217	-8.22727	57.8627	89.4706	56.4521
419	YBR252W	DUT1	+	178.325	194.912	241.59	236.551	223.635	219.253
420	YBR253W	SRB6	+	72.5833	84.9688	79.5412	80.9756	81.8028	87.9138
421	YBR254C	TRS20	-	115.394	124.596	102.123	125.432	130.12	110.508
422	YBR255C-A	RCF3	-	90.9194	102.425	74.4688	77.5094	101.103	98.5077
423	YBR255W	MTC4	+	108.321	44.5385	-32.4138	31.4783	135.257	31.0256
424	YBR256C	RIB5	-	134.153	178.164	55.8642	106.136	121.339	149.118
425	YBR257W	POP4	+	63.1216	84.6197	9.80769	61.971	50.1781	50.2911
426	YBR258C	SHG1	-	117.831	151.97	130.956	155.81	91.2778	111.879
427	YBR259W	NA	+	125.432	62.2	-150.485	8.06897	32.2326	27.5862
428	YBR260C	RGD1	-	81.6078	75.9206	-38.0755	102.069	78	97.6667
429	YBR261C	TAE1	-	142.182	159.887	122.51	126.079	123.447	131.95
430	YBR262C	MIC12	-	111.827	135.729	104.979	110.558	134.041	115.583
431	YBR263W	SHM1	+	53.0385	52.1692	-35.9215	36.6458	54.8973	53.2945
432	YBR264C	YPT10	-	64.06	39.75	21.6667	43.92	13.7778	34.9535
433	YBR265W	TSC10	+	133.2	131.836	85.5176	171.865	151.957	120.549
434	YBR267W	REI1	+	114.443	101.235	49.2517	110.233	117.379	100.246
435	YBR268W	MRPL37	+	115.919	105.063	104.094	105.061	102.021	109.35
436	YBR269C	SDH8	-	150.262	154.579	133.712	144.182	128.341	152.753
437	YBR270C	BIT2	-	4.28571	-140.25	-241.077	-10.8667	-165.667	34.7778
438	YBR271W	EFM2	+	107.431	95.2073	34.6909	80.561	96.1316	113.273
439	YBR272C	HSM3	-	152.022	145.8	-2.69231	253.038	173.964	137.098
440	YBR273C	UBX7	-	120.148	98.7059	64.1932	183.28	85.4184	96.7857
441	YBR274W	CHK1	+	195.633	179.569	81.52	173.154	195.651	147.548
442	YBR275C	RIF1	-	111.214	-59.0241	-433.824	-234.347	-232.62	28.3148
443	YBR276C	PPS1	-	-19.7881	-56.6121	-172.942	-131.416	-130.956	-152.2
444	YBR278W	DPB3	+	81.7805	135.887	73.2105	92.2881	81.5833	104.52
445	YBR279W	PAF1	+	106.276	136.543	115.422	112.025	151.412	85.5949
446	YBR280C	SAF1	-	64.3529	67.25	-45.8333	101.933	142.778	6.33333
447	YBR281C	DUG2	-	79.9863	101.279	-133.539	-16.9265	45.0339	57.7714
448	YBR282W	MRPL27	+	82.6667	93.1905	77.7463	94.7397	103.127	91.4712
449	YBR283C	SSH1	-	132.383	147.832	50.1475	129.791	140.142	133.082
450	YBR284W	NA	+	-649.909	-529.875	-314.2	-35.25	100.562	-483.9
451	YBR285W	HAB1	+	152.5	136	210.111	114.231	141.824	144.5
452	YBR286W	APE3	+	44.1056	42.412	-44.374	26.2211	35.8971	44.085
453	YBR287W	NA	+	77.9721	68.7903	-1.1934	31.3651	61.4508	53.3785
454	YBR288C	APM3	-	132.543	131.021	-10.5319	31.6771	98.6852	7.42254
455	YBR289W	SNF5	+	47.6222	55.5833	28.5	0	4.10526	-2.56818
456	YBR290W	BSD2	+	82.2542	108.929	2.55	49.5935	123.361	101.02
457	YBR291C	CTP1	-	52.4859	52.8125	-2.87374	55.7175	54.8912	31.4359
458	YBR293W	VBA2	+	75.96	2.87234	-161.98	-6.25	-125.939	-13.0435
459	YBR295W	PCA1	+	-280.229	-362.283	-592.27	-468.916	-422.54	-308.146
460	YBR296C	PHO89	-	172.5	186.363	38.4615	161.63	80.7234	180.241
461	YBR297W	MAL33	+	98.4261	55.7193	-45.2821	-40.2118	84.9326	-15.4267
462	YBR298C	MAL31	-	32.6531	45.4468	-37.3284	-64.6267	1.44	-69.24
463	YBR299W	MAL32	+	119.5	152.5	27.9375	82.7778	143.818	130.545
464	YBR301W	PAU24	+	133.2	136	125.857	133.75	136	144
465	YBR302C	COS2	-	147.561	92.8209	79.5179	79.283	108.925	125.656
466	YCL001W	RER1	+	76.2933	81.85	63.3141	76.0747	101.796	80.28
467	YCL002C	NA	-	160.824	158.91	113.589	170.329	107.577	133.736
468	YCL004W	PGS1	+	145.1	178.808	-89.52	-13.4194	350	362.15
469	YCL005W	LDB16	+	140.5	120.731	73.4878	126.455	123.55	166.906
470	YCL005W-A	VMA9	+	120.071	105.636	107.522	110.108	110.115	108.798
471	YCL008C	STP22	-	370.385	294.58	89.8657	231.821	282.846	279.426
472	YCL009C	ILV6	-	114.015	116.248	87.2654	115.147	109.611	123.151
473	YCL010C	SGF29	-	1436.23	1424.62	1346.3	1491.79	1333.05	1387.86
474	YCL011C	GBP2	-	142.361	100.758	100.207	114.31	128.983	117.728
475	YCL012C	NA	-	113.515	117.28	123.435	118.319	119.344	120.102
476	YCL014W	BUD3	+	-53.1579	-121.91	-315.968	-164.426	-449.5	-379.796
477	YCL016C	DCC1	-	127.321	159.872	74.3103	106.882	103.172	133.067
478	YCL017C	NFS1	-	126.937	95.1839	23.6725	106.08	126.873	118.987
479	YCL018W	LEU2	+	85.1957	89.4989	70.2935	87.0442	92.7838	87.6672
480	YCL021W-A	NA	+	653.333	664.4	669.273	453.923	601.083	614.714
481	YCL024W	KCC4	+	57.625	-26.5556	-59.5556	114.786	41.2759	-37.5
482	YCL025C	AGP1	-	48.1778	78.8516	-91.5	-7.53797	-24.6512	39.3053
483	YCL026C-B	HBN1	-	107.724	70.0833	28.7826	62.375	64.4615	506.222
484	YCL027W	FUS1	+	89.8182	143.034	-31.5789	66.0556	93.95	127.571
485	YCL028W	RNQ1	+	76.065	82.4844	-0.120879	66.6823	107.428	85.191
486	YCL029C	BIK1	-	1045.68	1298.81	599.65	911.609	1065.47	884.29
487	YCL030C	HIS4	-	52.5647	61.6267	-70.2276	54.364	59.2261	69.6312
488	YCL031C	RRP7	-	87.7931	104.518	51.1438	94.2929	87.6902	92.8282
489	YCL032W	STE50	+	102.7	137.657	79.8293	128.511	143.268	167.255
490	YCL033C	MXR2	-	71.0227	85.3664	83.5571	73.4242	73.3892	72.128
491	YCL034W	LSB5	+	25.6714	69.806	-2.33803	59.3188	70.7949	49.4769
492	YCL035C	GRX1	-	114.611	115.269	105.611	114.065	111.918	113.167
493	YCL036W	GFD2	+	113.271	91.1964	-26.6087	97.15	102.977	90.02
494	YCL037C	SRO9	-	479.43	435.412	451.15	472.129	423.194	434.312
495	YCL038C	ATG22	-	15.7125	13.8136	-77.0617	-30.013	13.5915	-14.8136
496	YCL039W	GID7	+	-149.975	-114.577	-169.765	-49.1017	8.87234	67.8824
497	YCL040W	GLK1	+	136.227	103.255	11.5805	91.518	94.3618	26.232
498	YCL042W	NA	+	1502.87	1467.17	1286.59	1467.52	1450.44	1335.55
499	YCL043C	PDI1	-	69.898	72.3375	-22.3592	57.0061	75.7214	75.3259
500	YCL044C	MGR1	-	179.727	207.323	71	149.762	175.74	142.309
501	YCL045C	EMC1	-	-10.8109	31.9351	-154.726	12.0893	25.6932	-36.1538
502	YCL047C	POF1	-	106.293	86.0435	81.8205	130.867	87.0625	100.171
503	YCL048W	SPS22	+	90.7931	97.8571	103.241	103.321	95.5417	341.643
504	YCL048W-A	NA	+	602.111	506.889	366.25	214.429	227.25	224.542
505	YCL049C	NA	-	124.735	139.169	87.5894	139.087	134.407	105.769
506	YCL050C	APA1	-	110.841	104.679	76.3415	91.6379	101.028	84.6066
507	YCL051W	LRE1	+	106.474	101.226	-0.96	122.273	105.956	112.781
508	YCL052C	PBN1	-	139.203	78.6481	46.7727	91.069	104.562	75.8276
509	YCL054W	SPB1	+	87.55	77.3532	-49.1223	38	87.1189	44.61
510	YCL055W	KAR4	+	158.018	179.642	117.27	114.692	101.993	118.303
511	YCL056C	PEX34	-	62.4464	78.7857	68.9375	40.6522	72.8551	45.3684
512	YCL057C-A	MIC10	-	118.414	118.579	116.644	125.308	122.35	120.047
513	YCL057W	PRD1	+	81.8021	92.7308	-45.7407	89.8676	87.6444	58.7206
514	YCL058W-A	ADF1	+	64.343	66.4885	56.8298	60.4634	65.5503	65.5291
515	YCL059C	KRR1	-	96.5602	99.9363	63.301	107.873	97.8169	98.5733
516	YCL061C	MRC1	-	325.897	326.97	58.75	213.741	100.303	57.9143
517	YCL063W	VAC17	+	142.6	109.675	92.6333	153.737	155.833	126.558
518	YCL064C	CHA1	-	101.23	108.636	12.794	101.473	99.2301	101.282
519	YCL067C	HMLALPHA2	-	77.75	85.2222	88.2	81	81.5833	84.75
520	YCR002C	CDC10	-	116.017	86.2564	52.2585	111.721	106.026	110.858
521	YCR003W	MRPL32	+	146.508	143.741	144.84	123.721	129.178	142.575
522	YCR004C	YCP4	-	149.613	161.451	117.512	127.284	150.676	154.012
523	YCR005C	CIT2	-	147.854	169.898	-11.6529	62.9434	86.9877	146.532
524	YCR006C	NA	-	1636.43	1434.81	1308	1566.27	1508.06	1527.18
525	YCR007C	DFP3	-	216.294	170.5	141.143	145.75	82.871	116.05
526	YCR008W	SAT4	+	226.656	246.91	33.6164	207.467	141.275	180.08
527	YCR009C	RVS161	-	198.212	218.628	128.985	156.411	211.245	221.422
528	YCR011C	ADP1	-	-227.093	-151.352	-263.309	-195.018	-268.276	-477.412
529	YCR012W	PGK1	+	137.603	143.817	54.5445	135.64	136.332	135.652
530	YCR014C	POL4	-	94.2917	101.875	47.6875	96.1471	87.6562	-12.4167
531	YCR015C	CTO1	-	298.07	531.87	239.691	383.152	235.727	240.949
532	YCR016W	RBP95	+	156.573	159.207	118.275	150.771	164.747	134.442
533	YCR017C	CWH43	-	128.06	57.9026	-35.2516	81.1761	33.7425	0.918519
534	YCR018C	SRD1	-	181.894	174.331	160.103	195.258	174.133	152.343
535	YCR019W	MAK32	+	110.346	138.467	82.2222	172.909	185.878	108.379
536	YCR020C	PET18	-	86.4286	-3.84615	82.3636	39.6667	84.5	16.9333
537	YCR020C-A	MAK31	-	215.106	233.4	206.452	175.415	313.8	275.333
538	YCR020W-B	HTL1	+	484.478	481.925	448.943	469.897	481.275	474.429
539	YCR021C	HSP30	-	168.091	168.769	251.176	172.9	302.385	95.3333
540	YCR022C	NA	-	724.692	683.714	1008.23	808.692	1088.3	1198.56
541	YCR023C	NA	-	80.96	63.2973	-103.419	19.5	-273.4	-49.3214
542	YCR024C	SLM5	-	109.65	329.5	89.1351	191.25	168.167	205.853
543	YCR024C-A	PMP1	-	521.942	523.442	512.098	521.566	511.286	514.462
544	YCR024C-B	NA	-	184.637	184.003	180.629	185.206	178.947	182.851
545	YCR026C	NPP1	-	184.811	204.762	51.6447	173.419	153.514	189.173
546	YCR027C	RHB1	-	294.804	287.314	240.68	258.46	325.897	269.038
547	YCR028C	FEN2	-	469.81	393.516	345.566	419.692	430.644	376.312
548	YCR028C-A	RIM1	-	173.281	176.916	147.743	170.071	175.91	170.099
549	YCR030C	SYP1	-	953.904	937.288	835.227	900.402	893.604	852.951
550	YCR031C	RPS14A	-	115.038	118.32	104.786	120.241	120.691	122.83
551	YCR032W	BPH1	+	-244.743	-411.417	-1081.79	-546.41	-410.708	-661
552	YCR033W	SNT1	+	122.596	-27.2899	-135.945	-4.87097	71.9242	1.61538
553	YCR034W	ELO2	+	128.222	119.681	90.8373	118.505	106.544	121.366
554	YCR035C	RRP43	-	139.917	122.935	43.0451	140.701	165.938	156.767
555	YCR036W	RBK1	+	59.75	86.7431	8.76667	72.942	85.0714	71.6901
556	YCR037C	PHO87	-	-17.0488	19.3433	-193.338	-139.611	-223.538	-48.2115
557	YCR038C	BUD5	-	36.6364	124.71	79.5	-78.4375	-81.4167	114.333
558	YCR039C	MATALPHA2	-	183.5	148.754	84.4667	100.016	112.187	85.3385
559	YCR040W	MATALPHA1	+	243.333	220.167	226.3	218.391	222.8	221.692
560	YCR042C	TAF2	-	24.9868	-298.646	-384.372	-287.513	-449.582	-501.357
561	YCR043C	NA	-	170.212	166.42	144.656	165.006	173.13	203.222
562	YCR044C	PER1	-	66.3208	83.0909	45.7297	40.5556	31.7778	45.1471
563	YCR046C	IMG1	-	123.714	134.933	56.43	105.205	122.306	130.938
564	YCR047C	BUD23	-	162.039	175.515	136.164	149.103	150.988	151.305
565	YCR048W	ARE1	+	187.569	215.012	66.5312	172.316	156.887	143.857
566	YCR051W	NA	+	178.689	192.177	151.882	177.642	157.201	176.968
567	YCR052W	RSC6	+	1653.23	1630.06	1505.72	1591.41	1649.33	1663.72
568	YCR053W	THR4	+	67.2827	80.2978	-7.63944	75.5174	69.4856	81.2217
569	YCR054C	CTR86	-	100.244	154.683	120.533	128.152	104.613	-5.5
570	YCR057C	PWP2	-	61.1381	73.0305	-132.873	33.3687	12.7318	48.8207
571	YCR059C	YIH1	-	994.098	899.316	738.859	853.099	860.1	905.66
572	YCR060W	TAH1	+	120.964	125.117	112.787	124.269	126.097	125.129
573	YCR061W	TVS1	+	293.95	148.714	174.844	226	207.628	221.735
574	YCR063W	BUD31	+	1662.88	1659.58	1299.15	1076.62	931.375	798.196
575	YCR065W	HCM1	+	272.694	291.297	250.714	314.649	234.818	318.185
576	YCR066W	RAD18	+	146.462	156.7	20.12	172.16	66.2895	111.897
577	YCR067C	SED4	-	-135.662	46.3	-333.145	-192.192	-156.319	29.9118
578	YCR068W	ATG15	+	1067.28	1299.31	765.214	1037.73	852.074	886.963
579	YCR069W	CPR4	+	117.556	87.0889	56.0909	90.7358	84.1475	101.056
580	YCR071C	IMG2	-	84.1194	103.095	70.6731	78.6825	75.141	81.4588
581	YCR072C	RSA4	-	59.9113	78.0845	-9.07143	37.7982	43.5618	59.3387
582	YCR073C	SSK22	-	-491.179	-596.381	-970.845	-843.541	-653.926	-632.282
583	YCR073W-A	SOL2	+	117.151	138.408	54.0306	109.189	110.017	111.511
584	YCR075C	ERS1	-	115.684	136.85	116	146.833	126.857	146.429
585	YCR075W-A	EGO2	+	86.0556	92.7385	102.521	110.043	89.8889	118.559
586	YCR076C	FUB1	-	167.567	95.3333	121.154	117.03	122.4	147.609
587	YCR077C	PAT1	-	113.089	80.0486	-60.1772	54.8525	104.652	23.0805
588	YCR079W	PTC6	+	119.167	63.4	13.0278	126.615	103.032	8.61905
589	YCR081W	SRB8	+	74.125	66.6739	177.969	98.55	-154.471	532.483
590	YCR082W	AHC2	+	147.491	145.605	119.736	123.654	162.331	151.107
591	YCR083W	TRX3	+	150.426	143.079	112.767	117.484	123.702	128.051
592	YCR084C	TUP1	-	245.397	206.415	73.2486	232.185	226.761	212.35
593	YCR086W	CSM1	+	50.75	56.0408	58.3667	55.6341	69.8261	44.9375
594	YCR087C-A	NA	-	64.0831	53.4192	46.5282	66.6635	63.7541	60.8649
595	YCR088W	ABP1	+	103.457	80.2077	16.0843	102.561	89.3425	192.974
596	YCR089W	FIG2	+	-386.615	-137.4	-727.097	-250.2	-374.123	-358.5
597	YCR090C	NA	-	71.454	73.2621	62.0649	70.0076	70.0286	77.0909
598	YCR091W	KIN82	+	241.286	-112.273	-14.25	136.773	115.143	59.5
599	YCR092C	MSH3	-	-410.229	-414.286	-458.588	-311.29	-858.933	-975.9
600	YCR093W	CDC39	+	-230.274	-420.491	-607.866	-417.462	-738.831	-439.388
601	YCR094W	CDC50	+	301.037	276.45	190.591	202.926	238.697	212.985
602	YCR095C	OCA4	-	74.8936	110.086	17.4865	46.5476	66.9184	81.6579
603	YCR095W-A	NA	+	1276	1145.04	1181.5	1173.22	1171.75	1189.22
604	YCR098C	GIT1	-	249.455	219.8	255.429	57.4286	231.444	180
605	YCR099C	NA	-	554.667	739.667	299.083	309.333	482.727	565.429
606	YCR100C	EMA35	-	795.4	798.87	625.087	655.862	682.444	826.033
607	YCR101C	NA	-	1919.29	1640.11	1050.48	1386.74	1576.17	1589.68
608	YCR102C	NA	-	273.5	89.3333	-76.3333	-89	114.273	122.167
609	YCR105W	ADH7	+	13.5	37.6667	56.6	18	49.1111	37.2
610	YCR106W	RDS1	+	1081.23	1179	305.296	888.588	1112.74	1086.8
611	YCR107W	AAD3	+	332	246.062	33.1667	215.833	270.962	168.111
612	YDL001W	RMD1	+	93.4545	46.8421	20.4	99.6562	8.22581	67.08
613	YDL002C	NHP10	-	262	287.811	181.641	289.322	253.737	214.161
614	YDL003W	MCD1	+	155.694	87.6122	7.72973	88.2	63.5909	108.19
615	YDL004W	ATP16	+	265.729	282.377	222.232	241.361	269.5	253.582
616	YDL005C	MED2	-	203.686	217.127	87.0988	154.641	187.807	185.717
617	YDL006W	PTC1	+	110.667	122.821	70.6226	106.966	75.3261	104.804
618	YDL007W	RPT2	+	64.7598	64.9624	-20.9258	56.9375	52.423	46.9269
619	YDL008W	APC11	+	108.426	96.0263	95.1667	132.949	118.333	101.491
620	YDL010W	GRX6	+	223.608	249.972	183.167	249.778	215.809	254.095
621	YDL012C	NA	-	156.127	162.688	162.667	159.19	153.857	153.882
622	YDL013W	SLX5	+	59.3889	-62.8205	-79.4643	-5	39.7692	64.8936
623	YDL014W	NOP1	+	178.19	171.363	125.015	178.118	167.667	168.499
624	YDL015C	TSC13	-	221.42	229.807	185.769	205.16	212.733	222.387
625	YDL017W	CDC7	+	196.106	101.75	-158.37	68.9268	144.792	173.275
626	YDL018C	ERP3	-	169.34	178.183	104.818	231.44	142.635	175.432
627	YDL019C	OSH2	-	64.7073	-128.176	-351.337	-134.839	13.9808	-3.55319
628	YDL020C	RPN4	-	102.848	117.04	24.5864	66.4268	29.1854	20.7279
629	YDL021W	GPM2	+	5.28571	93.7333	69.1154	52.2857	101	31.3684
630	YDL022W	GPD1	+	193.139	148.656	95.6357	142.559	130.56	149.459
631	YDL024C	DIA3	-	284	513.5	-59.8889	261	162.6	286.111
632	YDL025C	RTK1	-	166.25	139.98	117.254	82.1045	92.0921	138.603
633	YDL027C	MRX9	-	36.5366	156.079	7.27778	94.3509	-48.6909	20.6
634	YDL028C	MPS1	-	150.03	110.432	-66.7179	117.884	4.5814	-152.651
635	YDL029W	ARP2	+	146.154	143.371	92.6123	116.071	136.468	162.749
636	YDL030W	PRP9	+	-4.8125	-14.4324	-132.333	-21.7857	-75.2	-95.4118
637	YDL031W	DBP10	+	56.1791	54.8251	-148.621	48.2941	-0.5	-36.4187
638	YDL033C	SLM3	-	21.8636	179.5	4.52	259.708	-91.5	-5.36842
639	YDL035C	GPR1	-	-147.763	-85.9176	-160.839	50.337	-52.3654	-119.955
640	YDL036C	PUS9	-	288.475	236.782	177.941	194.475	194.333	277.119
641	YDL037C	BSC1	-	2847.38	2581.75	2193.46	2667.71	2314.28	2477.72
642	YDL039C	PRM7	-	211.409	128.463	35.5	150.228	73.4904	108.103
643	YDL040C	NAT1	-	77.0703	41.4663	-44.3228	60.0129	67.0552	48.9622
644	YDL042C	SIR2	-	-6.7193	-14.4375	-0.8	60.619	-84.2581	-102.361
645	YDL043C	PRP11	-	387.556	718.778	525.105	515.203	501.338	598.305
646	YDL044C	MTF2	-	-49.2	345.25	-32.2308	91.3043	74.2857	105
647	YDL045C	FAD1	-	112.49	171.773	65.6825	88.5493	108.586	97.7377
648	YDL045W-A	MRP10	+	119.846	121.287	114.71	123.223	120.382	117.512
649	YDL046W	NPC2	+	264.913	267.039	240.16	260.094	269.364	258.084
650	YDL047W	SIT4	+	283.907	313.849	267.109	310.838	296.639	302.669
651	YDL048C	STP4	-	76.6588	40.0886	46.3564	68.1723	66.1774	49.6736
652	YDL049C	KNH1	-	206.661	175.388	209.052	216.482	128.35	160.875
653	YDL051W	LHP1	+	104.901	113.819	75.2667	97.0952	110.209	101.658
654	YDL052C	SLC1	-	328.44	301.743	258.58	257.633	305.241	308.876
655	YDL053C	PBP4	-	213.683	175.337	159.739	179.109	170.819	169.59
656	YDL054C	MCH1	-	76.4409	33.9231	-79.6022	53.9906	45.2524	18.5714
657	YDL055C	PSA1	-	170.34	167.777	111.21	172.388	177.304	180.104
658	YDL056W	MBP1	+	8.44444	63.125	-105.729	-9.14286	-24.8182	44.9231
659	YDL057W	NA	+	166.115	203.435	46.5667	65.5	87.3636	406.706
660	YDL058W	USO1	+	-231.465	-188.191	-682.703	-173.8	-248.274	-396.492
661	YDL059C	RAD59	-	262.667	275.6	227.1	252.393	248.7	244.706
662	YDL060W	TSR1	+	65.5561	70.6035	-157.225	39.2554	57.338	53.6286
663	YDL061C	RPS29B	-	173.234	176.274	175.373	175.844	172.478	170.716
664	YDL063C	SYO1	-	115.593	95.4387	-12.8596	89.4789	93.0242	91.4383
665	YDL064W	UBC9	+	123.511	128.516	102.727	121.878	128.127	131.629
666	YDL065C	PEX19	-	76.2188	88.75	7.18966	58.431	46.6301	56.8222
667	YDL066W	IDP1	+	81.0491	97.7844	38.7602	63.3075	88.3629	70.9333
668	YDL067C	COX9	-	236.793	241.688	230.759	240.56	248.277	238.939
669	YDL069C	CBS1	-	65.8095	86.5714	49.5926	75.7826	74.4118	37.1875
670	YDL070W	BDF2	+	82.8635	53.4916	-46.0997	25.9757	-8.57059	-7.60851
671	YDL072C	YET3	-	100.909	94.9316	76.4112	88.7536	88.5592	83.5787
672	YDL073W	AHK1	+	-350.726	-435.438	-446.466	-117.021	-700.78	-518.706
673	YDL074C	BRE1	-	-22.7292	-6.30769	-167	12.6082	-106.309	-24.16
674	YDL075W	RPL31A	+	63.5531	65.6494	55.3831	64.427	64.7278	63.8973
675	YDL076C	RXT3	-	192.688	195.607	162.593	154.059	166.333	198.85
676	YDL077C	VAM6	-	-143.081	-67.8718	-375.5	-164.853	-266.225	-149.943
677	YDL078C	MDH3	-	357.599	293.754	451.198	444.756	423.995	343.282
678	YDL079C	MRK1	-	-591.333	-767.172	-743.45	-670.386	-569.857	-619.594
679	YDL080C	THI3	-	65.6279	63.0465	6	103.109	1.83333	-42.9318
680	YDL081C	RPP1A	-	108.642	107.709	98.1512	103.1	108.233	107.551
681	YDL082W	RPL13A	+	123.22	128.484	87.8766	126.042	124.512	124.563
682	YDL083C	RPS16B	-	124.856	128.285	108.894	126.306	129.36	129.512
683	YDL084W	SUB2	+	76.3312	77.0274	16.2588	80.8587	75.9621	81.6812
684	YDL085C-A	NA	-	158.631	171.333	153.921	223.096	191.591	222.747
685	YDL085W	NDE2	+	1778.77	1781.31	1637.34	1791.39	1746.83	1768.94
686	YDL086W	NA	+	76.5498	100.785	44.5802	85.2152	100.264	90.198
687	YDL087C	LUC7	-	1386.98	1367.6	1100.55	1152.68	1398.56	1102.41
688	YDL088C	ASM4	-	97.4219	118.638	52.9041	97.6818	68.9906	81.087
689	YDL089W	NUR1	+	-106.368	-86.8125	-144.393	-61.7692	110.63	-48.4242
690	YDL090C	RAM1	-	513.778	433.977	500.044	769.7	857.227	694.61
691	YDL091C	UBX3	-	20.85	60.4615	69.8519	64.0769	53.1818	49.5217
692	YDL092W	SRP14	+	138.063	141.03	126.717	142.555	134.472	131.899
693	YDL093W	PMT5	+	277.815	248.521	126.585	279.143	201.5	132.188
694	YDL095W	PMT1	+	91.1939	154.061	-1.47801	73.8146	98.1921	110.623
695	YDL097C	RPN6	-	105.743	115.35	23.6432	87.3832	80.5733	77.0823
696	YDL098C	SNU23	-	163.871	154.167	124.276	142.031	144.174	138.192
697	YDL099W	BUG1	+	78.7835	56.2923	14.1346	49.9247	75.9213	65.1098
698	YDL100C	GET3	-	89.5701	104.298	20.84	70.263	73.7643	61.8563
699	YDL101C	DUN1	-	120.457	80.5294	-63.129	31.2222	39.5278	80.8571
700	YDL102W	POL3	+	61.55	60.7403	-168.5	2.04255	46.125	71.9524
701	YDL103C	QRI1	-	107.93	99.0189	6.60396	69.7423	81.8764	119.337
702	YDL104C	QRI7	-	56.8824	88.8571	60.5	67.5	179.087	50.8
703	YDL105W	NSE4	+	406.333	204.667	74.4286	280.286	321.269	97.5385
704	YDL106C	PHO2	-	99.2647	156.727	-55.541	5.90476	124.286	103.903
705	YDL107W	MSS2	+	120.35	127.448	140.4	137.871	132.739	157.654
706	YDL108W	KIN28	+	64.2241	48.1481	-36.6222	51.807	40.4386	71.8431
707	YDL109C	NA	-	403.545	550.5	17.25	382.571	215.944	268.615
708	YDL110C	TMA17	-	166.916	214.706	140.32	161.333	157.131	141.372
709	YDL111C	RRP42	-	83.7833	101.457	43.672	64.3294	77.8	82.3782
710	YDL112W	TRM3	+	-61.1385	-86.1527	-171.991	-35.8279	-252.452	-124.767
711	YDL113C	ATG20	-	79.8182	-9.91489	-67.8571	-69.5581	-38.7586	-11.5116
712	YDL115C	IWR1	-	69.7857	40.7593	-10.9667	57.34	59.6286	75
713	YDL116W	NUP84	+	81.0723	103.476	-67.2022	25.9901	-4.09091	25.55
714	YDL117W	CYK3	+	-0.964912	15.6379	-237.558	-27.7451	-299.8	-136.288
715	YDL119C	HEM25	-	117.894	111.286	56.4559	87.5846	133.148	44.3922
716	YDL120W	YFH1	+	137.796	141.027	126.33	127.725	131.786	115.704
717	YDL121C	EXP1	-	152.8	158.109	136.966	142.438	147.988	149.581
718	YDL122W	UBP1	+	33.9524	18.3114	-183.606	3.25824	-18.6159	-34.8937
719	YDL123W	SNA4	+	563.97	489.146	416.854	512.927	463.221	408.816
720	YDL124W	NA	+	107	102.281	27.5213	74.9569	50.8428	62.1568
721	YDL125C	HNT1	-	122.148	118.562	105.801	127.247	113.23	118.585
722	YDL126C	CDC48	-	31.4345	42.0211	-169.904	38.5878	53	52.6095
723	YDL127W	PCL2	+	149.414	148.466	142.316	162.828	161.373	159.951
724	YDL128W	VCX1	+	145.459	146.44	142.927	130.969	151.75	145.651
725	YDL129W	NA	+	351.405	361.361	300.724	391.433	282.897	305.385
726	YDL130W	RPP1B	+	96.0136	96.3764	91.8059	96.3339	96.6621	95.1801
727	YDL130W-A	STF1	+	159.685	160.486	145.946	154.357	157.38	157.251
728	YDL131W	LYS21	+	70.9536	93.8299	0.180519	81.3364	74.5199	75.5475
729	YDL132W	CDC53	+	69.7816	24.044	-99.7197	-44.8929	-59.0213	-17.3077
730	YDL133C-A	RPL41B	-	205.072	205.703	204.355	206.23	207.057	206.121
731	YDL133W	SRF1	+	104.46	89.0976	98.6923	52.1818	41.1935	16.7632
732	YDL134C	PPH21	-	52.8158	83.3729	19.5922	65.9249	85.2679	63.2824
733	YDL135C	RDI1	-	154.604	169.403	152.283	153.754	137.382	140.241
734	YDL136W	RPL35B	+	100.645	100.659	83.2962	93.4157	100.628	103.535
735	YDL137W	ARF2	+	157.027	157.236	149.639	148.25	149.194	152.641
736	YDL138W	RGT2	+	-41.9167	80.65	-90.8919	17.6875	-262.032	-111.407
737	YDL139C	SCM3	-	131.241	131.455	74.1471	135.88	117.194	74.7273
738	YDL140C	RPO21	-	-48.1797	-105.452	-643.086	-163.371	-120.053	-144.407
739	YDL141W	BPL1	+	35.5303	155.789	64.9167	70.7206	-7.62903	126.311
740	YDL142C	CRD1	-	106.214	119.789	102.417	121.148	117.206	135.08
741	YDL143W	CCT4	+	72.2357	76.8021	4.70531	74.9576	92.5095	75.6099
742	YDL144C	NA	-	103.56	107.698	20.0185	83.2292	96.9649	98.26
743	YDL145C	COP1	-	79.0065	92.273	-186.15	24.5967	33.1598	24.865
744	YDL146W	LDB17	+	32.05	69.8158	-50.2667	-4	-167.205	-65.68
745	YDL147W	RPN5	+	238.528	274.137	81.7534	188.261	165.362	208.745
746	YDL148C	NOP14	-	217.293	238.613	101.724	202.108	179.915	207.782
747	YDL149W	ATG9	+	-0.8	-63.6667	-417.692	-203.773	-415.211	-671.25
748	YDL150W	RPC53	+	73.8531	91	26.3101	90.4435	102.811	73.4908
749	YDL153C	SAS10	-	101.566	92.7032	-47.1616	102.277	70.2421	72.0889
750	YDL154W	MSH5	+	-54.2692	53.6923	-97.1935	64.4167	-176.4	123.333
751	YDL155W	CLB3	+	122.318	70.4211	43.6415	29.3958	60.0597	-42.125
752	YDL156W	CMR1	+	1486.85	1509.04	1095.49	1477.23	1322.72	1121.07
753	YDL157C	DMO2	-	163.96	161.341	164.789	166.423	149.712	157.602
754	YDL159W	STE7	+	45.8511	-46.0714	-50.7857	16.4444	10.5962	40.7917
755	YDL160C	DHH1	-	487.515	468.952	472.623	476.089	295.342	359.503
756	YDL160C-A	MHF2	-	205.535	257.941	207.879	233.924	261.8	223.056
757	YDL161W	ENT1	+	111.573	117.764	65.9157	156.843	119.026	83.7375
758	YDL164C	CDC9	-	129.508	119.362	68.6786	116.268	76.9048	118.551
759	YDL165W	CDC36	+	63.3111	55.9275	37.5965	47.9043	64.3846	50.7792
760	YDL166C	FAP7	-	68.7407	85.6165	60.8153	83.6859	82.2374	77.6346
761	YDL167C	NRP1	-	116.306	60.6828	41.5854	97.5487	37.4953	5.20192
762	YDL168W	SFA1	+	115.844	125.574	80.6306	95.3544	144.533	112.693
763	YDL169C	UGX2	-	59.3529	76.375	2.3913	40.1333	153.444	80.4091
764	YDL170W	UGA3	+	170.558	129.439	-30.0563	83.7571	76.6818	92.1333
765	YDL171C	GLT1	-	-110.404	41.066	-636.347	-136.38	-100.173	-131.48
766	YDL173W	PAR32	+	101.103	107.394	74.4803	103.217	90.0098	95.2873
767	YDL174C	DLD1	-	54.8333	74.9398	-79.2135	61.4163	42.0104	39.5886
768	YDL175C	AIR2	-	220.639	184.818	100.514	121.651	115.149	149.4
769	YDL176W	GID12	+	2.02857	-5.27778	-221.545	-146.333	-98.2593	-235.917
770	YDL177C	NA	-	91.7391	69.7143	64.3684	94.1579	87.5556	49.7
771	YDL178W	DLD2	+	41.8507	16.6596	-100.275	19.984	24.2866	-31.3248
772	YDL179W	PCL9	+	142.056	144.776	124.811	130.239	125.817	144.969
773	YDL180W	AIT1	+	80.5	86.2093	-76	14.3529	23.3	9.21429
774	YDL181W	INH1	+	235.267	118.258	329.021	120.629	304.938	198.455
775	YDL182W	LYS20	+	74.6022	77.2389	-0.40066	72.046	65.5703	56.7887
776	YDL183C	MRX19	-	128	148.581	96.4667	70	112.912	56.25
777	YDL184C	RPL41A	-	216.124	216.746	216.315	217.44	218.568	218.193
778	YDL185W	VMA1	+	41.4485	43.5333	-199.585	19.7467	51.722	48.7772
779	YDL188C	PPH22	-	73.6835	92.9346	34.5747	86.4186	92.6598	92.2439
780	YDL189W	RBS1	+	50.475	74.35	-4.13514	84.8065	29.7568	4
781	YDL190C	UFD2	-	32	-9.32877	-112.642	83.5116	57.6477	69.9853
782	YDL191W	RPL35A	+	93.414	98.0125	86.4987	95.23	99.2916	97.4023
783	YDL192W	ARF1	+	139.43	144.125	104.418	129.667	148.942	169.044
784	YDL193W	NUS1	+	218.976	185.887	102.934	170.187	156.514	204.754
785	YDL194W	SNF3	+	33.5833	-69.3214	-338	-143.933	-452.881	-264.553
786	YDL195W	SEC31	+	76.9953	72.1681	-187.782	88.7047	63.0368	35.9128
787	YDL197C	ASF2	-	302.714	548	67.7931	216.192	251.577	277.632
788	YDL198C	GGC1	-	129.444	136.257	93.8575	124.142	119.72	146.797
789	YDL199C	NA	-	397.5	241.5	-35.9375	-293.867	-360.333	123.235
790	YDL200C	MGT1	-	73.4595	58.0323	64.2273	79.6571	101	99.8085
791	YDL201W	TRM8	+	92.4198	85.6716	52.6158	80.5033	81.6139	48.446
792	YDL202W	MRPL11	+	923.735	988.983	927.309	888.614	777.93	732.632
793	YDL203C	ACK1	-	122.667	152.137	-96.0943	119.5	88.549	152.756
794	YDL204W	RTN2	+	-16	154.636	-24.5909	76.4	79.1429	80.3333
795	YDL205C	HEM3	-	211.613	217.24	181.234	252.888	206.884	208.202
796	YDL206W	YCX1	+	-421.421	-122.737	-520.2	-358.806	-420.824	-513.278
797	YDL207W	GLE1	+	126.784	194.377	-101.952	69.537	15.3433	40.9423
798	YDL208W	NHP2	+	120.667	119.164	95.4981	119.716	120.852	121.25
799	YDL209C	CWC2	-	190.069	169.097	98.7692	197.893	206.875	149.277
800	YDL210W	UGA4	+	94.375	53.5	64.7143	96.6	86	90
801	YDL211C	NA	-	356.167	124.63	121.053	60.35	129.722	87.55
802	YDL212W	SHR3	+	135.177	142.723	120.792	145.871	141.996	143.145
803	YDL213C	NOP6	-	150.215	107.209	112.374	129.664	116.902	126.087
804	YDL214C	PRR2	-	490	130	-296	-146	231.667	-113.571
805	YDL215C	GDH2	-	-125.067	-121.194	-469.578	-285.413	-233.09	-186.801
806	YDL216C	RRI1	-	144.056	405.556	-39.4	33.2414	170.333	46.5789
807	YDL217C	TIM22	-	289.684	338.821	312.123	324.232	281.839	213.66
808	YDL219W	DTD1	+	230.333	248.062	178.724	183.709	238.723	234.638
809	YDL220C	CDC13	-	440.974	306.889	165.098	271.615	700.179	1298.62
810	YDL222C	FMP45	-	1928.78	1361.6	834.9	1213.83	1409.32	1318.31
811	YDL223C	HBT1	-	310.609	250.1	-39	264.412	166.311	47.8431
812	YDL224C	WHI4	-	133.073	162.903	120.985	112.051	153.354	63.3966
813	YDL225W	SHS1	+	108.011	95.6774	47.98	90.8696	57.8899	59.0676
814	YDL226C	GCS1	-	205.965	201.517	143.574	207.416	195.387	215.052
815	YDL227C	HO	-	68.7692	-34.1739	-142.048	56.3704	64.1364	66.25
816	YDL229W	SSB1	+	79.4626	82.6789	7.39912	83.4345	80.2532	76.2845
817	YDL230W	PTP1	+	53.8333	52.1026	35.8529	4.3125	50.2727	29.5455
818	YDL231C	BRE4	-	-45.9545	76.3438	-182.854	-40.7959	-26.8333	-55.6154
819	YDL232W	OST4	+	259.189	265.606	256.66	266.102	264.068	264.373
820	YDL233W	MFG1	+	184.83	129.065	113.722	123.857	72.5342	143.304
821	YDL234C	GYP7	-	93.0921	71.8319	-75.6739	35.2824	-11.6757	-18.129
822	YDL235C	YPD1	-	120.902	126.118	115.825	129.385	126.568	130.271
823	YDL236W	PHO13	+	141.799	147.217	113.833	133.444	142.037	140.995
824	YDL237W	AIM6	+	149.121	202.495	120.702	159.449	143.339	180.876
825	YDL238C	GUD1	-	916.938	358.471	241.476	665.5	531.333	1202.53
826	YDL239C	ADY3	-	61	49.5	-344	-50.25	-41.6154	80.6923
827	YDL240W	LRG1	+	291.324	149.658	-445.909	-124.667	-48.0714	-210.333
828	YDL241W	NA	+	276.077	266.402	242.43	278.37	253.521	251.687
829	YDL243C	AAD4	-	221	815	143.438	149.1	142.538	311.625
830	YDL244W	THI13	+	150.875	142.643	140.25	158.231	162.167	173.1
831	YDR001C	NTH1	-	118.792	86.0325	-140.856	19.5882	40.069	21.8514
832	YDR002W	YRB1	+	163.565	173.684	136.418	171.549	168.269	168.114
833	YDR003W	RCR2	+	284.596	284.522	298.619	306.047	284.804	289.712
834	YDR003W-A	NA	+	151.286	354.667	590.643	188.875	341.455	180.312
835	YDR004W	RAD57	+	163.857	142.781	-79.1132	103.545	167.85	126.745
836	YDR005C	MAF1	-	157.281	127.844	75.8088	78.9808	91.6712	142.435
837	YDR006C	SOK1	-	24.0143	33.5145	-165.088	-7.27389	-55.8136	7.9771
838	YDR009W	GAL3	+	2135.43	1112.85	465.389	983.667	845.308	797.4
839	YDR011W	SNQ2	+	-32.9235	-146.099	-383.765	39.8258	-222.613	-252.935
840	YDR012W	RPL4B	+	93.0203	90.1447	62.9913	87.127	94.223	85.713
841	YDR013W	PSF1	+	130.418	154.294	25.7209	124.96	52.9565	168.325
842	YDR014W	RAD61	+	97.6818	207.034	201.571	243.536	230.238	72.4444
843	YDR014W-A	HED1	+	159.688	201.214	185.941	157.52	242.444	159.364
844	YDR016C	DAD1	-	111.712	119.493	115.667	135.426	112.38	113.288
845	YDR017C	KCS1	-	52.3529	-33.2857	-285.848	-81.759	-194.582	-316.642
846	YDR018C	MLG1	-	-16.3571	62.4	30.4615	38.0625	-92.5556	55
847	YDR019C	GCV1	-	173.347	162.216	94.7925	148.089	155.691	148.888
848	YDR020C	DAS2	-	1372.11	1377.33	1341.71	1375.08	1414.77	1334.74
849	YDR021W	FAL1	+	69.9615	75.0682	7.57692	52.8627	27.3731	-5.56522
850	YDR022C	ATG31	-	110.833	114.842	65.35	114.769	113.538	109.364
851	YDR023W	SES1	+	121.357	132.392	32.6553	121.402	121.896	112.083
852	YDR025W	RPS11A	+	89.0082	89.6768	79.3753	88.7823	88.3785	86.0964
853	YDR026C	NSI1	-	72.2931	-43.6774	-105.882	-63.6038	41.0169	-85.2857
854	YDR027C	VPS54	-	-257.875	-166.311	-544.14	-217.864	-305.647	-378.571
855	YDR028C	REG1	-	235.681	210.194	-196.968	273.457	70.6142	238.699
856	YDR030C	RAD28	-	-94.8	6.9	-84.6	26.1429	-4.66667	9.88889
857	YDR031W	MIX14	+	147.953	148.25	122.469	161.038	148.121	141.255
858	YDR032C	PST2	-	150.885	154.837	138.614	157.941	167.305	165.032
859	YDR033W	MRH1	+	395.852	392.755	375.966	422.7	359.087	362.846
860	YDR034C	LYS14	-	6.73563	73.175	-215.645	-199.127	-24.8333	-87.6932
861	YDR034W-B	CPP3	+	835.539	981.279	676.525	665.508	695.628	832.688
862	YDR035W	ARO3	+	195.928	186.761	142.162	185.41	171.456	174.153
863	YDR036C	EHD3	-	132.169	91.3208	133.152	103.35	124.103	111.61
864	YDR037W	KRS1	+	51.7635	59.1404	-69.3265	59.6956	34.5026	34.8689
865	YDR038C	ENA5	-	148.825	165.207	133.143	139.381	157.578	144.26
866	YDR039C	ENA2	-	109.493	114.683	100.083	94.5797	100.488	109.4
867	YDR040C	ENA1	-	152.82	122.731	92.4694	76.963	117.034	122.698
868	YDR041W	RSM10	+	166.383	220.512	156.375	171.274	183.935	154.051
869	YDR042C	NA	-	116.75	91.9	63.1538	71.1333	102.333	100.143
870	YDR043C	NRG1	-	146.48	129.8	95.7308	98.9752	83.0849	141.152
871	YDR044W	HEM13	+	123.742	135.659	104.266	133.616	134.729	136.929
872	YDR045C	RPC11	-	205.652	205.275	209.232	209.718	208.582	222.239
873	YDR046C	BAP3	-	43.1699	68.3319	-21.9187	45.6716	-14.1803	36.092
874	YDR047W	HEM12	+	50.2547	103.394	10.3962	67.1368	76.9649	58.7228
875	YDR049W	VMS1	+	109.556	130.048	10.2083	68.5385	112.925	71.9535
876	YDR050C	TPI1	-	73.4791	73.7107	36.0929	69.8351	69.8863	70.1027
877	YDR051C	DET1	-	24.0649	76.5333	29.3924	34.25	43.7547	54.4225
878	YDR052C	DBF4	-	118.79	102.987	-76.4091	68.3538	-24.5811	66.8182
879	YDR054C	CDC34	-	411.08	423.626	349.901	407.025	414.959	395.557
880	YDR055W	PST1	+	132.631	152.331	51.5968	97.5475	106.635	109.448
881	YDR056C	EMC10	-	77.2812	85.9554	53.7597	77.7261	73.6938	77.522
882	YDR057W	YOS9	+	46.0213	98.2353	-13.8732	60.5417	93.9762	19.1961
883	YDR058C	TGL2	-	125.609	142.438	2	61.6667	46.7188	102.2
884	YDR059C	UBC5	-	119.975	115.692	113.774	119.303	112.737	112.074
885	YDR060W	MAK21	+	15.4542	37.6516	-82.136	50.8133	-41.6198	-69.4091
886	YDR061W	NA	+	67.9216	101.387	-33.0408	64.8158	42.3404	91.3333
887	YDR062W	LCB2	+	383.243	405.681	355.526	416.466	374.827	351.839
888	YDR063W	AIM7	+	109.219	79.7403	71.48	86.0988	64.9157	74.5128
889	YDR064W	RPS13	+	79.2488	81.6479	63.354	77.4814	81.5396	79.5521
890	YDR065W	RRG1	+	709.935	577.5	337.69	601.548	374.242	589.917
891	YDR066C	RTR2	-	111	70.28	61.0909	148.24	53.5625	210.182
892	YDR067C	OCA6	-	87.5	111.383	36.9457	85.3025	110.183	81.9667
893	YDR068W	DOS2	+	124.033	171.387	37.4177	152.427	128.245	128.042
894	YDR069C	DOA4	-	-90.7059	213.36	-171.04	114.625	1.08	48.0952
895	YDR070C	FMP16	-	144.933	147.636	117.35	141	383.321	514.333
896	YDR071C	PAA1	-	85.4585	84.6068	64.7798	84.8407	85.7423	92.6413
897	YDR072C	IPT1	-	-155.595	-241.319	-95.1226	-48.9637	-232.221	-258.269
898	YDR073W	SNF11	+	36.1391	-13.9256	-45.0476	-3.41772	-36.5659	32.3196
899	YDR074W	TPS2	+	212.266	159.944	-93.25	107.742	95.7623	-121.932
900	YDR075W	PPH3	+	134.305	122.193	84.4074	162.711	115.889	135.163
901	YDR076W	RAD55	+	1245.2	1137.93	607.528	843.125	526.897	476.92
902	YDR077W	SED1	+	294.668	298.095	274.52	292.591	292.878	291.396
903	YDR078C	SHU2	-	-30.4	-4.73913	-79.3	-69.5789	26.0741	-85.7059
904	YDR079C-A	TFB5	-	202.28	200.185	183.382	177.424	203.628	198.992
905	YDR079W	PET100	+	181.792	221.627	175.326	203.419	189.944	278.268
906	YDR080W	VPS41	+	279.12	-18.1667	-8.27451	67.5294	-69.4103	-159.698
907	YDR081C	PDC2	-	-116.844	-188.875	-90.75	-153.081	-205.327	-387.571
908	YDR082W	STN1	+	311.212	596.95	209.742	216.429	429.8	429.897
909	YDR083W	RRP8	+	91.8767	86.8158	18.3723	93.1135	94.4924	72.3803
910	YDR084C	TVP23	-	174.375	189.268	99.3718	185.947	154.042	160.966
911	YDR085C	AFR1	-	-3.312	6.21622	-118.363	-77.7114	0.393805	-5.43709
912	YDR086C	SSS1	-	256.625	280.772	225.2	254.945	286.43	251.494
913	YDR087C	RRP1	-	104.218	95.913	62.4496	87.2339	92.8506	83.7844
914	YDR088C	SLU7	-	217.848	215.912	147.468	270.543	218.85	138.63
915	YDR089W	VTC5	+	136.078	-3.16393	-114.704	-67.55	-275.667	-56.4848
916	YDR090C	ILT1	-	352.673	346.627	265.756	342.366	295.982	341.439
917	YDR091C	RLI1	-	280.564	259.396	197.787	283.598	188.461	231.313
918	YDR092W	UBC13	+	87.0099	86.9943	82.582	90.6374	144.903	95.5915
919	YDR093W	DNF2	+	-385.606	-344.244	-548.611	-37.989	-425.406	-311.967
920	YDR096W	GIS1	+	49.0161	-127.542	-181.231	-81.1667	-6.35821	-167.4
921	YDR097C	MSH6	-	-58.125	-50.7436	-251.732	-17.7581	1.09877	33.6207
922	YDR098C	GRX3	-	108.096	59.2547	58.1905	61.9045	91.4315	90.801
923	YDR099W	BMH2	+	226.786	233.313	225.162	231.551	232.853	229.517
924	YDR100W	TVP15	+	191.286	179.475	150.449	151.099	173.99	180.802
925	YDR101C	ARX1	-	54.0521	81.6257	-31.2691	80.2565	75.8828	76.1748
926	YDR103W	STE5	+	-52.1961	-42.06	-183.148	-77.129	-130.097	-14.7818
927	YDR104C	SPO71	-	208	53.3043	-541.4	-191.125	-29.1333	-118.057
928	YDR105C	TMS1	-	19.7812	-27.2075	-21.9825	85.5283	-34.8036	-92.1569
929	YDR106W	ARP10	+	-108.4	-344.333	54	-6.5	-28.1667	-20.75
930	YDR107C	TMN2	-	-61.7429	-34.5366	-53.3125	-16.7941	-251.385	-87.931
931	YDR108W	TRS85	+	66.96	50.9167	-107.564	41.7297	51.45	-117.811
932	YDR109C	NA	-	-9.29268	188.529	-146.36	-179.071	26.5172	52.7917
933	YDR110W	FOB1	+	152.095	34.6522	116.594	140.886	50.8605	-2.1875
934	YDR111C	ALT2	-	234.25	192.125	149.412	169.326	151	306.259
935	YDR113C	PDS1	-	79.6207	48.9062	22.1818	88.0455	73.4091	79.619
936	YDR115W	MRX14	+	165.587	155	147.214	150.673	149.676	154.254
937	YDR116C	MRPL1	-	100.333	121.787	68.7013	117.431	108.97	111.971
938	YDR117C	TMA64	-	137.702	122.493	-70.375	74.2931	69.3673	66.75
939	YDR118W	APC4	+	-13.5217	-64.0312	-226.3	52.5556	-135.968	-123.824
940	YDR119W	VBA4	+	-177.163	-183.764	-220.765	-172.874	-267.089	-297.829
941	YDR119W-A	COX26	+	238.409	211.459	225.879	219.931	253.029	234.364
942	YDR120C	TRM1	-	197.25	190.677	71.9119	184.151	162.057	166.219
943	YDR121W	DPB4	+	94	108.295	107.352	98.9688	99.1875	100.516
944	YDR122W	KIN1	+	-17.125	120.207	-214.841	-413.169	-194.744	-71.5857
945	YDR123C	INO2	-	550.851	551.341	493.557	534.366	520.09	545.148
946	YDR124W	NA	+	405.485	386.14	248.097	231.207	336.018	340
947	YDR125C	ECM18	-	210.889	285	341.533	182	-24.7143	217.053
948	YDR126W	SWF1	+	3310.54	3619.65	2737.77	2919.5	2568.64	2964.48
949	YDR127W	ARO1	+	-32.4511	-87.5679	-337.309	-27.9709	-101.665	-160.086
950	YDR128W	MTC5	+	152.019	38.5	-73.1562	-11.125	117.19	-67.3617
951	YDR129C	SAC6	-	86.2172	112.708	13.8031	90.9398	58.6264	86.2227
952	YDR130C	FIN1	-	1702.3	1633.1	1632.33	2113.45	1675.43	1899.91
953	YDR131C	NA	-	39.5385	46.3103	42	13.1154	-53.7857	-74.8696
954	YDR132C	MRX16	-	123.677	103.25	-5.10526	127.967	193	117.778
955	YDR135C	YCF1	-	-84.7358	-48.2426	-508.41	-135.257	-37.8691	-50.5345
956	YDR137W	RGP1	+	61.9362	10.6136	-44	7.19048	-36.8167	-19.8947
957	YDR138W	HPR1	+	467.364	260.964	318.132	477.95	232.305	101.3
958	YDR139C	RUB1	-	181.951	181.808	166.347	181.957	174.46	179.616
959	YDR140W	MTQ2	+	112.957	82.2424	79.5556	119.082	106.756	98.1884
960	YDR141C	DOP1	-	41.5789	74.5811	-429.775	-111.08	-391.048	-400.051
961	YDR142C	PEX7	-	69.24	49.2321	-18.5789	18.9362	59.6034	61.3333
962	YDR143C	SAN1	-	166.529	81	-27.494	90.3214	85.8475	81.2797
963	YDR144C	MKC7	-	668.291	729.012	377.401	444.974	748.941	780.358
964	YDR145W	TAF12	+	118.92	108.3	-8.4065	111.214	111.123	65.9545
965	YDR146C	SWI5	-	123.234	139.4	-77.8684	87.1596	23.3286	129.064
966	YDR147W	EKI1	+	-71.3571	-105.59	-229.212	-231.208	-66.8421	-92.8571
967	YDR148C	KGD2	-	192.983	210.283	53.6055	193	146.816	222.774
968	YDR150W	NUM1	+	-316.746	-118.029	-679.799	-303.992	-102.51	-134.98
969	YDR151C	CTH1	-	164.192	177.842	121.644	171.964	157.965	151.412
970	YDR152W	GIR2	+	71.3113	77.9725	46.6332	85.436	74.9591	74.7697
971	YDR153C	ENT5	-	99.9342	114.091	29.1716	125.42	103.158	93.4628
972	YDR155C	CPR1	-	106.173	109.415	91.8701	105.953	108.872	108.771
973	YDR156W	RPA14	+	102.122	97.2023	93.4681	100.283	96.7423	94.9439
974	YDR157W	NA	+	165.5	-278	-274.053	-260.818	-196.895	-277.667
975	YDR158W	HOM2	+	108.629	116.212	39.6463	104.54	109.457	101.249
976	YDR159W	SAC3	+	-420.058	-267.362	-575.075	-478.189	-460.415	-524
977	YDR160W	SSY1	+	-154.4	-271.667	-295.706	-144	-325.905	-40.16
978	YDR161W	ACL4	+	84.7151	95.3412	11.7405	79.2825	97.5073	78.7931
979	YDR162C	NBP2	-	183.884	197.338	146.239	179.232	188.419	179.848
980	YDR163W	CWC15	+	79.371	77.9286	65.5882	72.7143	98.6944	80.1
981	YDR164C	SEC1	-	93.4762	157.585	-120.814	-18.6909	116.911	30.5476
982	YDR165W	TRM82	+	67.2611	86.8526	-1.45513	63.5988	57.9321	48.522
983	YDR166C	SEC5	-	-74.8235	-82.4783	-465.034	-7.9	-149.195	-222.913
984	YDR167W	TAF10	+	83.7203	126.25	56.3721	108.093	116.5	112.713
985	YDR168W	CDC37	+	103.858	85.1562	-16.878	124.169	86.1868	74.9517
986	YDR169C	STB3	-	276.02	245.333	218.055	208.127	226.985	219.618
987	YDR170C	SEC7	-	-18.4199	33.1659	-543.351	-69.7806	27.0687	-214.149
988	YDR171W	HSP42	+	66.3235	80.8333	33.5294	137.5	35.6667	77.2917
989	YDR172W	SUP35	+	129.159	130.188	12.0659	115.977	124.208	118.938
990	YDR173C	ARG82	-	-31.1111	-78.1739	-41.8857	20.9	-158.25	-174.12
991	YDR174W	HMO1	+	164.64	169.388	125.505	169.178	165.227	168.309
992	YDR175C	RSM24	-	135.413	136.395	67.98	104.455	81.902	61.1957
993	YDR176W	NGG1	+	844.219	875.924	703.464	785.653	839.407	889.573
994	YDR177W	UBC1	+	94.3565	112.813	76.21	94.6368	98.2096	97.2857
995	YDR178W	SDH4	+	200.43	192.661	121.176	178.479	156.801	160.359
996	YDR179C	CSN9	-	149.1	118.719	120.194	122.92	143.348	145.893
997	YDR179W-A	NVJ3	+	98.3929	452.941	118.955	-133.348	-252.706	303.421
998	YDR180W	SCC2	+	-256.718	-456.225	-387.695	-460.455	-755.024	-734.5
999	YDR181C	SAS4	-	163.553	219.273	137.205	160.212	153.122	209.892
1000	YDR182W	CDC1	+	79.7416	77.7527	1.49153	97.17	22.6696	93.2174
1001	YDR182W-A	NA	+	952.231	998.12	980.353	952.611	999.6	980.389
1002	YDR183W	PLP1	+	94.8462	87.3191	23	66.4375	86.5957	82.6809
1003	YDR184C	ATC1	-	166.358	190.544	176.485	190.771	169.971	156.491
1004	YDR185C	UPS3	-	584.792	546.429	248.44	202.875	196	334.714
1005	YDR186C	SND1	-	133.548	52.0667	-84.0325	22.4957	96.882	50.6279
1006	YDR188W	CCT6	+	143.73	153.203	46.4895	139.162	123.358	132.376
1007	YDR189W	SLY1	+	97.0899	93.5273	-36.8125	116.506	88.9913	44.8077
1008	YDR190C	RVB1	-	91.6717	97.4077	2.34848	104.562	73.0174	89.0658
1009	YDR191W	HST4	+	106.706	209.65	8.91667	78.6087	124.625	76.2609
1010	YDR192C	NUP42	-	83.4082	54.1136	38.4138	87.8919	83.4048	88.7143
1011	YDR194C	MSS116	-	104.642	107.574	-22.6818	95.6391	100.335	111.896
1012	YDR195W	REF2	+	56.1404	62.8923	-86.7115	34.1017	6.17308	33.9574
1013	YDR196C	CAB5	-	88.0429	116.851	82.0833	114.24	104.746	118.5
1014	YDR197W	CBS2	+	49.9394	70.4348	38.3784	20.4242	29.3636	31.1562
1015	YDR198C	RKM2	-	5.46774	20.7	0.930233	97.3778	-0.824561	-10.451
1016	YDR200C	VPS64	-	222.162	92.6905	-83	230.2	203.204	54.3023
1017	YDR201W	SPC19	+	120.645	124.286	82.0698	121.75	87.0323	118.75
1018	YDR202C	RAV2	-	61.5152	71.1613	-12.2391	59.5526	193.49	41.5294
1019	YDR204W	COQ4	+	679.894	656	481.836	667.785	537.161	613.049
1020	YDR205W	MSC2	+	-22.8571	-70.3793	-137	102.936	-316.65	-213.977
1021	YDR206W	EBS1	+	6.84884	51.4146	-127.241	111.035	-74.9677	-171.983
1022	YDR207C	UME6	-	175.63	123.375	-9.42308	188.757	51.4	150.571
1023	YDR208W	MSS4	+	97.7982	30.8571	-48.3458	91.26	32.8103	67.914
1024	YDR210W	CPP2	+	306.988	298.719	291.228	306.847	311.409	319.113
1025	YDR211W	GCD6	+	212.46	242.839	-15.5657	163.218	164.48	196.303
1026	YDR212W	TCP1	+	197.869	184.915	48.9389	154.033	225.167	185.55
1027	YDR213W	UPC2	+	40.8776	-54.0976	-283.548	20.6585	-114.386	-178.683
1028	YDR214W	AHA1	+	153.612	165.33	25.9385	60.3886	123.512	27.6496
1029	YDR215C	NA	-	1040.91	1373.89	931.786	1271.14	953.583	1038.5
1030	YDR216W	ADR1	+	-145.649	-34.6061	-782.659	-347.581	-212.392	-209
1031	YDR217C	RAD9	-	-81.3208	-96.6304	-306.962	-162.383	-197.415	-257.982
1032	YDR218C	SPR28	-	8.8	91	78.3846	66.6	98.3125	106.818
1033	YDR219C	MFB1	-	227.147	210.875	70.4516	137.2	270.448	119.321
1034	YDR221W	GTB1	+	715.5	775.475	278.452	335.906	478.449	462.642
1035	YDR222W	NA	+	143.5	125	149.667	155.444	149.115	142.778
1036	YDR223W	CRF1	+	327	145.667	-249.5	-110.556	363	-146.4
1037	YDR224C	HTB1	-	114.422	118.193	103.49	113.792	113.031	113.143
1038	YDR225W	HTA1	+	154.034	156.279	131.837	146.112	153.685	148.765
1039	YDR226W	ADK1	+	117.183	114.725	92.8234	117.585	111.793	124.582
1040	YDR227W	SIR4	+	190.944	151.444	-335.015	46.0943	28.4808	12.6977
1041	YDR228C	PCF11	-	-25.2174	42.4314	-35.6364	40.9091	-22.7091	-45.7872
1042	YDR229W	IVY1	+	86.7568	26.2821	-3.86957	28.8636	18.6275	42.3696
1043	YDR231C	COX20	-	145.6	163.375	104.263	150.78	155.205	149.939
1044	YDR232W	HEM1	+	119.401	150.496	33.8202	119.602	127.34	139.639
1045	YDR233C	RTN1	-	117.545	118.244	80.9703	108.692	114.413	118.826
1046	YDR234W	LYS4	+	71.9566	65.554	-47.4325	72.4293	88.5862	71.6831
1047	YDR235W	PRP42	+	70.1154	19.587	-163.196	-59.8333	-51.6744	14.5278
1048	YDR236C	FMN1	-	87.6842	81.2453	107.434	102.882	109.8	101.444
1049	YDR237W	MRPL7	+	158.519	153.982	148.243	145.122	139.412	154.963
1050	YDR238C	SEC26	-	147.006	114.093	-46.6111	121.022	136.678	145.494
1051	YDR239C	NA	-	-54.3659	-28.1579	-230.93	-299.724	-380.806	-285.926
1052	YDR240C	SNU56	-	175.318	150.529	8.84	26.0857	148.132	254.731
1053	YDR242W	AMD2	+	148.019	139.451	-72.4615	184.526	44.8052	152.901
1054	YDR243C	PRP28	-	332.756	188.892	350.696	272.219	206.8	552.5
1055	YDR244W	PEX5	+	101.283	74.0208	39.1395	96.0612	55	-5
1056	YDR245W	MNN10	+	163.89	140.961	79.5893	148.824	153.946	136.772
1057	YDR246W	TRS23	+	304.831	174.4	120.094	257.444	224.797	188.467
1058	YDR247W	VHS1	+	280.312	297.091	103.723	272.183	181.868	138.298
1059	YDR248C	NA	-	135.241	100.75	111.212	119.789	124.885	81.6061
1060	YDR249C	NA	-	81.1042	127.17	80.5909	64.5122	98.4821	107.132
1061	YDR251W	PAM1	+	108.964	-24.4444	-190.857	19.4245	-65.7756	-8.51261
1062	YDR252W	BTT1	+	621.867	735.542	508.526	562	488.75	485
1063	YDR253C	MET32	-	110.421	106.4	101.875	163.571	74.5	146.875
1064	YDR254W	CHL4	+	523.632	482.95	369.833	331	329.111	309.286
1065	YDR255C	RMD5	-	577.677	447.5	221.442	325.39	275.404	412.806
1066	YDR257C	RKM4	-	357.29	293.391	143.233	195.282	342.225	288.329
1067	YDR258C	HSP78	-	398.636	-12.2273	-91.5952	33.1892	453.472	-21.0526
1068	YDR259C	YAP6	-	230.302	196.296	41.2222	232.655	264.367	63.4583
1069	YDR260C	SWM1	-	986.479	757.475	726.239	859.621	804.371	730.099
1070	YDR261C	EXG2	-	55.0887	23.24	-56.1579	-9.99505	-24.0935	42.9435
1071	YDR262W	NA	+	186.257	196.992	142.367	168.62	205.95	201.388
1072	YDR263C	DIN7	-	201.533	124.5	82.3333	162.538	83.75	23.0769
1073	YDR264C	AKR1	-	221.024	135.967	34.125	145.108	105.665	87.2766
1074	YDR265W	PEX10	+	140.439	124.904	177.581	153.045	68.7679	139.889
1075	YDR266C	HEL2	-	45.2268	138.633	1.93023	61.4836	94.9551	25.9457
1076	YDR267C	CIA1	-	232.771	357.778	218.512	361.29	313.143	280.6
1077	YDR268W	MSW1	+	141.4	373	52.1562	81.7143	37.9744	36.3529
1078	YDR270W	CCC2	+	17.7581	-132.583	-302.893	-88.7692	-365.36	-107.015
1079	YDR272W	GLO2	+	190.583	139.659	70.7898	146.891	160.664	225.772
1080	YDR273W	DON1	+	255.909	94.8	88.5556	397.5	98.9091	157.231
1081	YDR275W	TLD1	+	299.132	267.643	249.75	290.921	227.927	243.638
1082	YDR276C	PMP3	-	208.81	211.1	211.699	212.438	214.732	214.777
1083	YDR277C	MTH1	-	365.821	379.52	144.991	197.24	354.409	346.471
1084	YDR279W	RNH202	+	213	73.52	17.0556	18.8491	88.38	38.6098
1085	YDR280W	RRP45	+	124.638	112.154	35.7922	110.268	94.6356	119.972
1086	YDR281C	PHM6	-	240.727	232.808	236.5	221.84	192.947	219.933
1087	YDR282C	MRX10	-	207.346	39.7143	38.75	51.7778	181.909	79.6667
1088	YDR283C	GCN2	-	121.319	39.9583	-251.97	-236.492	3.11538	-342.565
1089	YDR284C	DPP1	-	145.33	71.8	-1.44882	17.68	51.3876	55.5263
1090	YDR285W	ZIP1	+	-2.83333	302.188	-72.7059	-98.7647	251.08	43.4444
1091	YDR286C	MGP12	-	80.2069	85.7778	82.6667	92.5862	85.7105	83.1724
1092	YDR287W	INM2	+	554.962	615.969	407.847	628.083	591.402	666.225
1093	YDR288W	NSE3	+	152.684	144.039	-0.315789	117.429	160	158.109
1094	YDR289C	RTT103	-	127.146	92.5106	-29.3509	96.5283	94.069	44.0877
1095	YDR291W	HRQ1	+	161.793	194.61	-82.2308	124.562	-56.3542	67.7059
1096	YDR292C	SRP101	-	69.5766	80.7899	-24.3486	86.6931	91.968	29.3465
1097	YDR293C	SSD1	-	196.839	116.859	-248.053	81.7368	82.754	-17.0498
1098	YDR294C	DPL1	-	40.8952	13.7252	-41.4937	10.5772	20.0814	-26.305
1099	YDR295C	HDA2	-	223.476	52.1458	-58.3404	-5	62.234	-71.725
1100	YDR296W	MHR1	+	97.3117	94.9101	79.8906	93.1067	107.664	97.7944
1101	YDR297W	SUR2	+	148.649	137.303	100.523	147.148	142.434	150.427
1102	YDR298C	ATP5	-	159.072	166.985	142.166	164.19	160.49	170.933
1103	YDR299W	BFR2	+	162.594	137.051	57.1818	84	94.3197	96.9474
1104	YDR300C	PRO1	-	111.57	95.4231	55.5333	62.2458	106.008	105.848
1105	YDR301W	CFT1	+	-373.254	-321	-470.914	-73.5385	-653.745	-486.364
1106	YDR302W	GPI11	+	96.2692	95.6833	95.2568	78.321	83.127	83.6032
1107	YDR303C	RSC3	-	4.60976	-40.5054	-181.603	-57.6481	53.4444	-61.3958
1108	YDR304C	CPR5	-	75.4217	73.9301	45.1057	65.9511	70.5697	72.3687
1109	YDR305C	HNT2	-	60.5932	86.7797	54.1731	94.12	97.623	49.9574
1110	YDR306C	PFU1	-	582.264	503.726	445.92	549.306	644.792	486.098
1111	YDR307W	PMT7	+	-4.5625	32.7391	39.4828	-100.133	98.2381	-53.5484
1112	YDR308C	SRB7	-	209.712	163.548	148.14	173.853	190.906	246.111
1113	YDR309C	GIC2	-	330.609	310.598	268.425	333.011	298.753	309.296
1114	YDR310C	SUM1	-	175.274	140.042	-29.4286	188.362	49.6389	100.014
1115	YDR311W	TFB1	+	101.07	86.7069	-98.6964	66.3091	41.381	68.9556
1116	YDR312W	SSF2	+	129.376	141.667	49.7105	143.099	121.225	113.824
1117	YDR313C	PIB1	-	169.96	161.207	55.9091	114.417	142.656	158.237
1118	YDR314C	RAD34	-	562.471	135.8	320.714	249.071	237.483	81.7692
1119	YDR315C	IPK1	-	128.348	185.387	30.7368	458.474	262.68	90.8621
1120	YDR316W	OMS1	+	44.2941	54.0727	4.90323	28.2857	21.5775	46.0769
1121	YDR317W	HIM1	+	550.938	264.227	125.429	327.316	224.846	-34.6471
1122	YDR318W	MCM21	+	174.917	203.464	75.5161	174.607	163	186.318
1123	YDR319C	YFT2	-	140.558	104.45	54.4773	182.208	14.7317	16.1935
1124	YDR320C	SWA2	-	37.9333	133.49	-5.71739	78.4737	161.538	154.476
1125	YDR320C-A	DAD4	-	122.529	168.019	85.5783	105.216	195.634	155.505
1126	YDR321W	ASP1	+	103.955	124.147	50.3596	85.5028	113.51	129.811
1127	YDR322C-A	TIM11	-	211.588	208.607	193.295	206.56	206.819	208.741
1128	YDR322W	MRPL35	+	116.696	71.6852	-2.92424	51.3478	77.7975	120.062
1129	YDR323C	PEP7	-	87.1667	-9.71429	-31.7273	-94.2105	-121.571	119.867
1130	YDR324C	UTP4	-	149.262	172.317	55.8851	161.034	109.335	188.184
1131	YDR325W	YCG1	+	-82.1143	-95.5161	-265.739	-54.641	-297.129	-326.529
1132	YDR326C	YSP2	-	-23.5575	72.7109	-168.521	-113.856	-10.082	-21.1294
1133	YDR328C	SKP1	-	215.634	190.358	154.916	193.26	193.463	197.366
1134	YDR329C	PEX3	-	77.3864	53.4107	-11.1346	89.2791	32.4643	39.8182
1135	YDR330W	UBX5	+	206.5	190	-50.2368	226.442	256.418	273.952
1136	YDR331W	GPI8	+	86.7556	69.4757	-40.5139	117.594	97.8354	76.378
1137	YDR332W	IRC3	+	-9.42308	129.864	-385	-20.5556	-193.692	-54.5714
1138	YDR333C	RQC1	-	141.097	65.2614	28.5806	133.207	126.14	67.7705
1139	YDR334W	SWR1	+	290.167	-467.033	-756.39	-517.911	-596.657	-735.922
1140	YDR335W	MSN5	+	47.2162	91	-184.163	-90.1651	-32.2391	-223.214
1141	YDR336W	MRX8	+	62.7143	93.4333	11.6522	72.7083	-31.1176	279.273
1142	YDR337W	MRPS28	+	79.2273	57.6607	20.6349	34.1552	37.9886	43.5556
1143	YDR338C	NA	-	3.86842	-109.821	-148.842	36.3488	6.7027	-46.5405
1144	YDR339C	FCF1	-	157.74	173.231	118.542	162.367	114.347	166.366
1145	YDR341C	NA	-	94.1011	93.6204	-42.1106	97.9839	90.3814	87.0101
1146	YDR342C	HXT7	-	138.41	141.569	140.57	141.893	157.06	140.528
1147	YDR343C	HXT6	-	82	86	-131.8	-29.4444	-76.4286	84
1148	YDR344C	NA	-	2217.78	2483.25	1860.71	2180.89	1810.44	1740.5
1149	YDR345C	HXT3	-	110.572	110.206	30.0646	80.9737	64.335	58.8987
1150	YDR346C	SVF1	-	206.183	194.953	130.685	207.813	153.095	165.552
1151	YDR347W	MRP1	+	85.8992	94.3137	29.7981	53.1186	99.4626	67.9221
1152	YDR348C	PAL1	-	164.611	173.935	114.144	171.667	179.355	191.234
1153	YDR349C	YPS7	-	114.016	69.7241	-31.1407	44.5848	67.1991	54.5181
1154	YDR350C	ATP22	-	-44.4605	-69.2571	-193.681	-66.8784	-150.351	-268.424
1155	YDR351W	SBE2	+	28.6838	-49.3984	-348.659	-73.693	-186.709	-183.825
1156	YDR352W	YPQ2	+	1265.58	1349.82	1204.16	1272.3	1364.14	1311.79
1157	YDR353W	TRR1	+	89.1599	100.788	59.0947	110.626	92.9151	107.359
1158	YDR354W	TRP4	+	55.3195	52.3643	-19.1018	67.2604	64.6719	48.3443
1159	YDR356W	SPC110	+	319.355	339.125	-91.0217	307.485	244.594	168.32
1160	YDR357C	CNL1	-	65.315	74.1957	60.5714	68.2794	53.5495	54.1196
1161	YDR358W	GGA1	+	160.37	171.095	-131.567	72.9062	99.1842	58.6
1162	YDR359C	EAF1	-	-5.38889	-98.0615	-61.4082	15.625	-47	-266.941
1163	YDR361C	BCP1	-	473.1	671.523	340.97	488.486	357.266	507.702
1164	YDR362C	TFC6	-	-15.6977	55.9091	-282.043	-233.561	-126.226	-169.414
1165	YDR363W	ESC2	+	403.4	374.9	287.333	499.136	315.953	317.019
1166	YDR363W-A	SEM1	+	157.553	168.287	163.553	154.469	142.121	151.224
1167	YDR364C	CDC40	-	397.34	375.417	198.588	300.105	326.787	275.714
1168	YDR365C	ESF1	-	60.2088	66.7904	-27.8182	57.0976	60.917	89.5625
1169	YDR367W	KEI1	+	77.3333	57.28	40.2124	45.4148	63.3007	47.1452
1170	YDR368W	YPR1	+	128.036	155.365	93.303	132.57	151.829	145.149
1171	YDR369C	XRS2	-	110	-63.9655	-334.688	-196.042	-176.08	-190.722
1172	YDR370C	DXO1	-	132.143	35.8983	-9.85714	7.32558	34.8293	-12.1622
1173	YDR371W	CTS2	+	46.2619	108.683	-30.9429	-5.28571	74.6944	14.7381
1174	YDR372C	VPS74	-	130.383	117.082	67.122	144	113.41	104.16
1175	YDR373W	FRQ1	+	113.688	114.509	87.1937	109.906	128.132	113.783
1176	YDR374C	PHO92	-	332.235	299.583	83	120.3	578.2	86.5
1177	YDR374W-A	WIP1	+	166.299	135.022	134.238	126.018	167.828	167.304
1178	YDR375C	BCS1	-	11.6744	16.94	-120.517	15.5385	-42.1452	-44.5745
1179	YDR376W	ARH1	+	36.6613	62.3095	-58.8226	73.2	49.1207	7.65625
1180	YDR377W	ATP17	+	299.743	292.876	266.972	281.466	291.267	292.918
1181	YDR378C	LSM6	-	186.855	194.027	179.626	180.672	187.386	199.921
1182	YDR379C-A	SDH6	-	136.071	142.538	116.364	124.588	119.417	147.786
1183	YDR379W	RGA2	+	34.9787	2.04444	-238.686	76.0513	-51.2615	20.2115
1184	YDR380W	ARO10	+	124.333	449.5	127.417	129	129.538	125.625
1185	YDR381C-A	COI1	-	128.872	128.442	109.75	124.697	141.694	130.289
1186	YDR381W	YRA1	+	119.696	113.351	101.915	125.092	79.3699	42.1362
1187	YDR382W	RPP2B	+	143.283	143.511	133.276	141.887	142.37	141.346
1188	YDR383C	NKP1	-	1369.18	1409.41	1286.64	1322.2	1455.88	1520.39
1189	YDR384C	ATO3	-	148.157	136.58	123.842	131.181	148.062	120.963
1190	YDR385W	EFT2	+	135.058	119.331	18.467	127.979	120.642	128.945
1191	YDR386W	MUS81	+	11.2581	27.9643	-135.438	174.944	178.381	122.643
1192	YDR387C	CIN10	-	-19.9722	118.767	-47	-89.4865	-2.89286	41.6897
1193	YDR388W	RVS167	+	263.733	354.901	131.566	263.071	308.076	242.882
1194	YDR389W	SAC7	+	275.616	210.084	80.7917	262.317	136.769	147.237
1195	YDR390C	UBA2	-	97.0167	27.7654	-49.8028	67.6966	87.8587	-7.66667
1196	YDR391C	NA	-	79.6429	80.6094	54.4144	86.3562	82.58	67.9762
1197	YDR392W	SPT3	+	557.543	629.043	350.452	304.471	268.896	317.245
1198	YDR393W	SHE9	+	133.606	132.444	129.682	242.889	248.889	179.947
1199	YDR394W	RPT3	+	62.3232	82.75	26.8021	73.8696	84.3836	69.0671
1200	YDR395W	SXM1	+	25.1682	61.8662	-96.5024	37.1848	32.9686	-8.4346
1201	YDR397C	NCB2	-	151.28	171.192	106.514	138.621	139.688	127.535
1202	YDR398W	UTP5	+	102.784	108.766	-6.86364	99.0415	82.8182	77.5104
1203	YDR399W	HPT1	+	122.586	116.598	96.9217	107.067	129.419	105.123
1204	YDR400W	URH1	+	204.596	187.856	152.911	141.653	250.229	182
1205	YDR402C	DIT2	-	103.4	84.3333	66.6	64.3333	106.5	63
1206	YDR403W	DIT1	+	187.652	154.875	141.071	266.762	174.167	177.25
1207	YDR404C	RPB7	-	166.21	169.129	148.813	149.72	166.177	204.412
1208	YDR405W	MRP20	+	281.391	222.805	74.3529	264.722	196.879	297.469
1209	YDR406W	PDR15	+	-458.308	-488.368	-207.524	-378	-660.345	-382.379
1210	YDR407C	TRS120	-	-316.758	-454.92	-826.238	-198.894	-227.261	-416.559
1211	YDR408C	ADE8	-	133.912	123.208	79.3055	114.442	109.984	111.55
1212	YDR409W	SIZ1	+	-340.467	-438.265	-219.037	-298.536	-443.194	-357.1
1213	YDR410C	STE14	-	183.506	66.1408	24.2561	86.25	147.017	97.12
1214	YDR411C	DFM1	-	-52.7073	-43.6444	-97.7073	-17.6735	-141.2	-238
1215	YDR412W	RRP17	+	137.628	141.411	123.911	150.088	149.409	146.697
1216	YDR414C	ERD1	-	135.962	127.34	46.12	134.92	139.745	123.909
1217	YDR415C	NA	-	713.915	719.633	476.319	622.724	321.057	492.968
1218	YDR416W	SYF1	+	-105.382	-66.5094	-226.972	-49.3409	-332.477	-304.387
1219	YDR418W	RPL12B	+	80.8659	85.8071	67.1016	84.7213	80.8269	83.0844
1220	YDR419W	RAD30	+	160.343	126.083	173.963	-10.2581	49.1707	194.062
1221	YDR420W	HKR1	+	-74.8705	66.8559	-473.155	-219.514	-105.396	-64.835
1222	YDR421W	ARO80	+	-17.4211	-357.677	-350.316	-345.542	-175.263	-251.2
1223	YDR422C	SIP1	-	214.359	293.026	103.441	151.976	116.455	95.6154
1224	YDR423C	CAD1	-	240.542	313.229	11.8	160.016	115.48	234.479
1225	YDR424C	DYN2	-	50.4375	77.1275	33.5035	34.4	49.4755	43.7345
1226	YDR425W	SNX41	+	26.1622	-15.6977	-221.279	6.98276	13.0244	0.818182
1227	YDR427W	RPN9	+	81.2958	77.4599	20.8052	69.6927	72.6491	64.2161
1228	YDR428C	BNA7	-	145.381	117.531	59.6494	125.638	87.6667	102.925
1229	YDR429C	TIF35	-	220.832	234.324	150.759	194.888	178.135	171.448
1230	YDR430C	CYM1	-	-406.611	-316.886	-442.438	-365.961	-388.632	-396.873
1231	YDR432W	NPL3	+	347.079	348.572	177.142	271.406	347.513	362.574
1232	YDR434W	GPI17	+	70.246	97.4962	-36.7478	39.0084	78.8968	64.1277
1233	YDR435C	PPM1	-	110.61	156.422	75.6909	122.559	118.143	86.32
1234	YDR436W	PPZ2	+	-46.3611	-156.711	-23.0588	73.0488	46.4038	-137
1235	YDR437W	GPI19	+	1378.38	1526.11	1145.18	1345.85	1294.34	1176.2
1236	YDR438W	THI74	+	5.11538	-4.19231	-29.4545	68.3333	-5.44	-60.1905
1237	YDR439W	LRS4	+	166.5	142.611	74.122	122.667	172.743	95.6471
1238	YDR440W	DOT1	+	261.868	156.857	24.0476	217.95	98.375	252.938
1239	YDR441C	APT2	-	192.139	187.482	167.783	204.024	189.944	192.413
1240	YDR443C	SSN2	-	109.857	-25.5897	-167.941	160.133	-248.167	-230.026
1241	YDR444W	NA	+	-107.727	-146.318	-202.152	-88.122	-224.622	-264.871
1242	YDR447C	RPS17B	-	127.164	128.686	109.652	124.553	129.502	130.143
1243	YDR448W	ADA2	+	195.8	140.655	77.5789	199.143	183.526	182.2
1244	YDR449C	UTP6	-	138.024	78.121	1.53982	120.106	91.115	87.1481
1245	YDR450W	RPS18A	+	112.434	111.174	96.3892	111.087	113.437	108.712
1246	YDR451C	YHP1	-	165.72	156.923	128.522	117.974	133.419	170.719
1247	YDR452W	PPN1	+	118.124	85.1146	-82.075	50.0825	81.375	20.5062
1248	YDR453C	TSA2	-	120.911	103.591	94.5682	90.5918	129.317	97.0909
1249	YDR454C	GUK1	-	110.875	117.269	94.2673	107.611	117.258	110.062
1250	YDR456W	NHX1	+	-14.7683	-47.01	-250.494	-73.6143	-35.9195	-20.6707
1251	YDR457W	TOM1	+	-576.354	-544.052	-1061.04	-671.952	-535.144	-576.496
1252	YDR458C	HEH2	-	63.6304	133.434	-102.081	86.8103	43.194	47.4375
1253	YDR459C	PFA5	-	91.9062	60.3095	14.7632	50.7368	14.4	107.562
1254	YDR460W	TFB3	+	163.868	149.4	115.907	164.2	147.6	155.071
1255	YDR461C-A	CMI8	-	176	142.409	145.174	191.35	164.167	140.773
1256	YDR461W	MFA1	+	137.167	148.5	136.667	147	132.308	149.2
1257	YDR462W	MRPL28	+	112.25	124.458	118.431	162.462	124.351	188.556
1258	YDR463W	STP1	+	165.26	176.347	23.5455	170.354	152.587	185.67
1259	YDR464W	SPP41	+	146.75	42.3571	-433.235	51.1818	28.4667	-35.1765
1260	YDR465C	RMT2	-	125.944	150.133	54.8434	118.264	121.243	122.152
1261	YDR466W	PKH3	+	189.6	128.771	-44.9231	189.617	42.4286	53.5714
1262	YDR468C	TLG1	-	110.397	129.92	100	157.526	152.976	117.535
1263	YDR469W	SDC1	+	238.29	296.473	280.963	267.592	246.276	270.91
1264	YDR470C	UGO1	-	178.167	-29.375	62.6667	132.571	21.1053	24.2941
1265	YDR471W	RPL27B	+	110.635	113.046	100.358	112.523	112.817	109.88
1266	YDR472W	TRS31	+	140.972	125.181	67.3103	133.086	112.392	115.5
1267	YDR473C	PRP3	-	40.7895	136.703	61.4118	175.486	81.675	61.2941
1268	YDR475C	JIP4	-	111.074	-37.3684	-162.195	71.9524	-29.76	29.5476
1269	YDR476C	NA	-	200.287	195.117	167.395	180.746	199.336	212.008
1270	YDR477W	SNF1	+	77.3826	72.1456	60.9082	133.309	89.4694	99.9851
1271	YDR478W	SNM1	+	681.787	744.2	415.743	638.3	422.1	427.483
1272	YDR479C	PEX29	-	-297.558	-204.5	-243.471	-242.081	-530.388	-350.581
1273	YDR480W	DIG2	+	109.357	103.48	97.0455	134.941	86.0938	138.824
1274	YDR481C	PHO8	-	76.0622	78.1344	-44.6554	85.004	84.0563	80.3917
1275	YDR482C	CWC21	-	292.392	228.074	291.152	379.595	413.299	464.613
1276	YDR483W	KRE2	+	131.029	145.708	32.4424	118.32	117.48	125.565
1277	YDR484W	VPS52	+	90.1944	65.878	-89.7561	17.5588	-66.4643	-26.3889
1278	YDR485C	VPS72	-	272.923	146.536	-33.2424	185.765	28.5682	42.0952
1279	YDR486C	VPS60	-	456.656	650.652	509.25	463.643	475.126	392.758
1280	YDR487C	RIB3	-	93.1783	94.2511	69.7382	92.0124	94.9236	100.116
1281	YDR488C	PAC11	-	780.567	843.714	721.35	830.84	545.793	305.2
1282	YDR489W	SLD5	+	221.225	219.15	158.592	191.745	361.25	131.949
1283	YDR490C	PKH1	-	88.7586	116.071	-104.769	103.429	198.308	-43.3514
1284	YDR492W	IZH1	+	107.746	110.653	80.7125	103.33	122.848	115.8
1285	YDR493W	MZM1	+	98.9268	108.692	109.703	117.457	102.343	109.167
1286	YDR494W	RSM28	+	60.8571	57.519	36.4533	53.4103	68.9765	64.4375
1287	YDR495C	VPS3	-	16.1379	71.7778	-288.706	-74.9412	-10.3333	-116.609
1288	YDR496C	PUF6	-	70.4752	64.2075	-44.4505	71.4015	38.2181	49.0307
1289	YDR497C	ITR1	-	68.2629	88.1637	-29.6329	54.4714	88.9636	63.7897
1290	YDR498C	SEC20	-	1916.49	1976.48	1610.45	1805.99	1803.71	1720.96
1291	YDR499W	LCD1	+	61.381	6.39286	-312	-85.7742	-161.048	-16.68
1292	YDR500C	RPL37B	-	90.3722	91.7133	85.1071	90.5651	91.0013	90.044
1293	YDR501W	PLM2	+	167.538	156.357	226.571	158.3	147.7	184
1294	YDR502C	SAM2	-	293.942	265.308	194.044	256.235	259.205	251.429
1295	YDR503C	LPP1	-	138.27	133.6	138.487	181.714	161.804	171.077
1296	YDR504C	SPG3	-	84.5	333.375	100.125	207.389	231.5	78.1818
1297	YDR505C	PSP1	-	185.043	247.213	-80.2766	273.91	121.833	52.2381
1298	YDR506C	GMC1	-	2977.18	2743.82	1476.06	2285.21	2225.35	2070.6
1299	YDR507C	GIN4	-	115.889	-20.5116	-74.913	151.883	56.4615	106.053
1300	YDR508C	GNP1	-	160.339	165.291	88.4286	138.586	99.9127	68.869
1301	YDR510W	SMT3	+	139.88	137.985	124.242	140.104	141.16	137.609
1302	YDR511W	SDH7	+	239.516	347.164	265.783	329.034	291.25	345.595
1303	YDR512C	EMI1	-	99.8	97	91.0115	98.6484	86.6698	90.5122
1304	YDR513W	GRX2	+	81.026	86.9458	75.682	84.5113	85.3918	88.6029
1305	YDR514C	NA	-	87.16	66.3	-1.425	79.7273	65.0984	15.069
1306	YDR515W	SLF1	+	82.3103	68.8	-1.83784	9.60606	41.8571	35.2308
1307	YDR516C	EMI2	-	87.092	92.5464	-34.0345	85.0699	55.0769	56.0354
1308	YDR517W	GRH1	+	85	96.3386	7.056	108.637	169.684	170.906
1309	YDR518W	EUG1	+	46.6164	38.7778	-66.9231	25.7391	-8.62712	36.5
1310	YDR519W	FPR2	+	220.995	218.772	203.194	220.896	216.688	257.688
1311	YDR520C	URC2	-	8.2	-5.58824	-335.316	-15.0417	-151.906	-216.467
1312	YDR523C	SPS1	-	-96.5455	191.9	76	-3.6	378.6	106.333
1313	YDR524C	AGE1	-	167.798	265.098	132.042	163.824	-15.0816	16.0366
1314	YDR524C-B	NA	-	300.821	299.808	290.081	291.125	301.7	297.574
1315	YDR525W-A	SNA2	+	261.094	339.105	244.76	237.762	308.752	287.079
1316	YDR527W	RBA50	+	191.853	127.426	19.809	166.632	218.555	220.817
1317	YDR528W	HLR1	+	89.913	91.2	122.762	52.8571	118.045	86.8667
1318	YDR529C	QCR7	-	214.521	202.92	188.814	213.45	208.592	204.491
1319	YDR530C	APA2	-	706.554	705.765	612.751	659.357	670.099	701.725
1320	YDR531W	CAB1	+	71.265	67.6404	-6.09929	78.0698	64.0227	65.73
1321	YDR532C	KRE28	-	78.7308	22	-28.3077	63.9355	61.0625	2.125
1322	YDR533C	HSP31	-	190.598	139.308	95.7204	109.641	136.425	183.639
1323	YDR534C	FIT1	-	196.015	224.8	181.5	124.636	224.413	242.727
1324	YDR538W	PAD1	+	237.859	280.353	217.475	276.689	213.644	178.333
1325	YDR539W	FDC1	+	85.9189	115.872	-37.1183	78.3067	118.681	74.2444
1326	YDR540C	IRC4	-	661.381	347.75	593.571	504.091	471.64	505.619
1327	YDR541C	NA	-	199.577	206.265	147.615	189.5	254.811	190.296
1328	YEL001C	IRC22	-	630.086	606.384	495.054	624.125	634.524	665.433
1329	YEL002C	WBP1	-	70.1724	80.0072	13.1533	69.4583	62.6194	53.9701
1330	YEL003W	GIM4	+	136.691	119.433	117.543	122.5	119.882	114.786
1331	YEL004W	YEA4	+	694.868	668.418	645.058	657.751	615.714	608.781
1332	YEL005C	VAB2	-	78.5714	47.8485	38.5714	90.4857	131.395	85.3095
1333	YEL006W	YEA6	+	302.814	328.203	245.881	239.743	276.68	302.234
1334	YEL007W	MIT1	+	-548.175	-509.487	-413.883	-331.5	-708.233	-588.433
1335	YEL008W	NA	+	380.5	283.5	295.2	260.25	282.333	311.2
1336	YEL009C	GCN4	-	91.1568	89.7776	68.6224	83.5652	88.0766	82.8108
1337	YEL011W	GLC3	+	-33.7179	-91.9833	-164.784	-151.729	-159.18	-117.05
1338	YEL012W	UBC8	+	89.35	94.5122	79.8525	80.9322	74.7692	73.7843
1339	YEL013W	VAC8	+	238.703	191.26	142.367	272.22	176.94	147.095
1340	YEL015W	EDC3	+	1230.57	1187.13	1062.82	1122.42	1242.07	1132.27
1341	YEL016C	NPP2	-	106.722	34.6897	22.9167	151.095	84.3684	117.462
1342	YEL017C-A	PMP2	-	446.68	446.259	435.216	452.136	441.812	435.862
1343	YEL017W	GTT3	+	53.7308	79.375	34.15	30.1765	2.96296	60.2353
1344	YEL018W	EAF5	+	127.933	99.619	23.1613	103.435	99.9	101.814
1345	YEL019C	MMS21	-	1107.5	1299	1333.25	1164.38	1022.26	536.625
1346	YEL020C	PXP1	-	91.625	18.3333	3.30435	88.3333	53.4118	-182.357
1347	YEL020W-A	TIM9	+	104.114	111.542	99.7167	98.5181	111.789	102.927
1348	YEL021W	URA3	+	69.5192	79.1635	45.983	76.5259	65.5947	63.6745
1349	YEL022W	GEA2	+	51.8404	8.04762	-421.808	-187.696	-189.933	-166.618
1350	YEL023C	NA	-	30.25	-9.46667	61	37.6	67.8	-68.2
1351	YEL024W	RIP1	+	459.295	438.421	381.245	428.778	435.015	449.597
1352	YEL025C	NA	-	183.595	67.9483	0.525	126.452	38.4231	-56
1353	YEL026W	SNU13	+	77.4099	77.5009	70.1359	76.7895	78.4518	78.1049
1354	YEL027W	VMA3	+	690.665	678.6	613.05	664.612	680.792	675.983
1355	YEL028W	NA	+	385.75	225.8	291	254.833	246.25	62
1356	YEL029C	BUD16	-	199.056	203.507	123.148	115.109	141.238	181.623
1357	YEL030W	ECM10	+	190.929	395.545	-21.8421	198.667	186.955	201.333
1358	YEL031W	SPF1	+	35.5493	-18.0031	-270.563	-1.60828	-36.2143	-37.2641
1359	YEL032W	MCM3	+	129.556	141.544	3.31	11.7619	60.3596	70.4681
1360	YEL033W	MTC7	+	-231.635	-231.174	-210.691	-214.993	-229.959	-229.268
1361	YEL034W	HYP2	+	207.774	210.9	194.228	207.549	206.728	207.421
1362	YEL036C	ANP1	-	95.3825	52.7181	0.281915	57.5616	49.6908	37.5629
1363	YEL037C	RAD23	-	177.805	186.557	82.2011	165.423	189.643	167.085
1364	YEL038W	UTR4	+	82.8551	75.4621	47.6483	72.1986	72.3688	65.1579
1365	YEL039C	CYC7	-	141.45	106.4	95.1084	99.1667	103.181	124.122
1366	YEL040W	UTR2	+	113.176	123.869	41.5165	94.1211	113.515	103.415
1367	YEL041W	YEF1	+	-225.667	405.778	-376.727	-272.625	-451.812	-247
1368	YEL042W	GDA1	+	158.725	157.417	75.633	171.028	181.354	160.351
1369	YEL043W	GTA1	+	65.2051	57.9815	45.9286	104.558	44.1228	43.7436
1370	YEL044W	IES6	+	129.653	88.5817	85.4307	113.248	76.9015	93.8636
1371	YEL046C	GLY1	-	496.619	479.395	475.097	507.514	430.896	402.761
1372	YEL047C	FRD1	-	51.2312	66.9412	-3.4183	32.0833	52.3036	48.2
1373	YEL048C	TCA17	-	919.108	723.72	858.515	662.125	646.588	685.841
1374	YEL049W	PAU2	+	179.455	101.571	117.68	126.077	122.818	97
1375	YEL050C	RML2	-	143.781	133.9	96.4938	125.189	151.516	98.5556
1376	YEL051W	VMA8	+	99.1546	104.76	64.2241	106.193	102.193	104.396
1377	YEL052W	AFG1	+	5.67073	35.4194	-1.94203	6.94521	20.2614	-20.4512
1378	YEL053C	MAK10	-	77.5873	64.4706	-143.213	24.4062	27.029	39.7368
1379	YEL054C	RPL12A	-	180.686	185.382	149.46	168.397	190.772	187.72
1380	YEL055C	POL5	-	12.3495	15.4792	-146.336	50.0682	-34.8908	71.8058
1381	YEL056W	HAT2	+	252.089	167.19	66.2586	129.988	185.589	292.627
1382	YEL057C	SDD1	-	69.2727	122	86.1034	201.471	111	103
1383	YEL058W	PCM1	+	128.648	132.091	-2.63397	68.331	172.556	148.709
1384	YEL059C-A	SOM1	-	59.7238	95.7262	62.0976	68.1507	89.4	62.6364
1385	YEL060C	PRB1	-	149.657	108.866	-3.86458	106.275	102.816	82.5926
1386	YEL061C	CIN8	-	202.611	159.471	58.9655	397.577	-143.133	-155.375
1387	YEL062W	NPR2	+	100.781	41.2222	-90.6905	-94.7188	-96.9697	-181.424
1388	YEL063C	CAN1	-	270.193	218.522	170.669	257.74	194.792	160.548
1389	YEL064C	AVT2	-	203.059	83.8636	97	88.6552	41.8125	221
1390	YEL065W	SIT1	+	29.2492	47.6351	-9.15487	55.7153	34.8933	43.0647
1391	YEL066W	HPA3	+	247.549	305.953	199.678	133.008	175.868	376.643
1392	YEL067C	NA	-	784	780.25	784.25	785.222	682.182	762.273
1393	YEL068C	NA	-	233.256	212.533	226.314	227.677	231.73	253.367
1394	YEL070W	DSF1	+	120.375	131.833	126.75	291	129.941	55.6364
1395	YEL071W	DLD3	+	74.7957	88.6042	25.0184	72.5024	94.5896	117.121
1396	YEL072W	RMD6	+	428.5	418.533	161.417	265.708	197.846	349.857
1397	YEL073C	NA	-	665.065	648.68	596.65	558.483	552.913	629.25
1398	YEL077C	NA	-	57	73.75	-10.0476	71.5185	47.1034	-4.6
1399	YER001W	MNN1	+	208.88	170.699	31.6324	131.712	74.6063	149.179
1400	YER002W	NOP16	+	98.2273	91.9756	68.27	93.4057	99.031	90.6631
1401	YER003C	PMI40	-	79.7031	71.9726	5.98993	63.518	88.5425	98.2541
1402	YER004W	FMP52	+	311.789	324.814	226.678	261.485	264.813	256.148
1403	YER005W	YND1	+	667.341	839.42	504.239	704.542	810.423	786.767
1404	YER006W	NUG1	+	79.9265	73.2378	5.00591	55.7831	60.0131	57.0558
1405	YER007C-A	TMA20	-	116.587	120.099	105.399	116.628	116.573	120.324
1406	YER007W	PAC2	+	133.538	68.4167	29	96.5294	33.3913	23.3333
1407	YER008C	SEC3	-	-51.3457	30.7848	-217.965	-31.7778	-248	-190.79
1408	YER009W	NTF2	+	159.729	164.115	151.096	162.05	161.932	155.671
1409	YER010C	NA	-	85.7391	81.28	49.5286	89.1613	75.4	97.2586
1410	YER011W	TIR1	+	92.717	115.643	85.3333	113.257	118.023	103.744
1411	YER012W	PRE1	+	115.538	120.393	144.129	132.895	115.932	116.623
1412	YER013W	PRP22	+	-161.784	21.375	33.8684	0	-22.0714	-17.0488
1413	YER014W	HEM14	+	150.119	84.5536	51.16	107.412	105.867	107.567
1414	YER015W	FAA2	+	146.429	-105.727	14.1739	166.167	-3.96552	63.3529
1415	YER016W	BIM1	+	106.891	122.988	23.4935	121.603	126.772	106.441
1416	YER017C	AFG3	-	116.341	118.085	-66.0163	40.3889	57.7591	-31.3511
1417	YER018C	SPC25	-	1660.83	1674.98	1668.31	1699.65	1955.64	1786.08
1418	YER019C-A	SBH2	-	166.177	157.102	164.484	153.509	163.415	154.417
1419	YER019W	ISC1	+	50.4388	52.1348	-3.73529	-1.75	49.2667	19.6329
1420	YER020W	GPA2	+	1317.78	1518.44	1201.21	1399.8	1521.73	1395.27
1421	YER021W	RPN3	+	98.1805	114.238	20.6652	88.7477	76.8094	78.936
1422	YER022W	SRB4	+	29.5484	38.1163	-49.1923	108.056	29.9821	-16.4545
1423	YER023W	PRO3	+	194.955	199.631	126.87	160.956	273.062	343.033
1424	YER024W	YAT2	+	-94.9744	36.7857	-229.951	-183.762	-114.429	111
1425	YER025W	GCD11	+	238.123	236.311	152.721	239.491	228.756	220.383
1426	YER026C	CHO1	-	108.066	101.761	72.2447	103.786	93.9019	99.1598
1427	YER027C	GAL83	-	190.403	171.294	18.942	146.795	178.269	120
1428	YER028C	MIG3	-	565.905	724.865	506.835	703.955	503.181	331.905
1429	YER029C	SMB1	-	90.5714	88.2468	53.1379	84.8026	78.3239	80.4915
1430	YER030W	CHZ1	+	119.898	116.39	107.137	122.369	122.97	129.076
1431	YER031C	YPT31	-	169.218	161.272	124.45	167.261	160.432	172.59
1432	YER032W	FIR1	+	196.71	183.308	84.3125	164.062	112.931	295.333
1433	YER033C	ZRG8	-	142.636	124.864	-171.514	189.033	116.186	48.1923
1434	YER034W	NA	+	575.687	567.215	546.771	570.417	575.261	524.315
1435	YER035W	EDC2	+	152.027	170.692	128.392	157.6	137.824	147.266
1436	YER036C	ARB1	-	79.4145	80.8275	-44.023	93.2295	81.3025	86.5732
1437	YER037W	PHM8	+	240.271	181.426	143.863	188.286	221.583	196.444
1438	YER038C	KRE29	-	435.762	492.471	491.312	450.588	233.56	88.0417
1439	YER038W-A	FMP49	+	679	620.25	494	364.5	648.167	692.364
1440	YER039C	HVG1	-	146.2	114.769	56	93.3	103.857	431.778
1441	YER039C-A	NA	-	947.25	820.25	679.6	395.5	667.714	918
1442	YER040W	GLN3	+	275.864	457.922	19.1395	237.353	186.377	129.275
1443	YER041W	YEN1	+	404.929	436.828	117.429	28.4231	124.971	-280.656
1444	YER042W	MXR1	+	138.303	157.574	84.881	112.19	111.989	137.355
1445	YER043C	SAH1	-	191.324	205.199	119.849	197.527	199.287	195.291
1446	YER044C	ERG28	-	122.002	121.763	109.324	117.222	122.429	110.99
1447	YER044C-A	MEI4	-	725.545	407	355.412	509.583	420.077	662.455
1448	YER045C	ACA1	-	139.283	91.224	11.6384	111.508	72.3228	81.771
1449	YER046W	SPO73	+	76.8143	76.1765	74.84	67.1111	97.7797	127.421
1450	YER047C	SAP1	-	39.8033	-11.907	-135.369	53.5918	-191.596	-264.932
1451	YER048C	CAJ1	-	271.293	289.762	178.601	204.591	215.475	282.174
1452	YER048W-A	ISD11	+	794.477	853.04	635.416	590.848	617.656	619.422
1453	YER049W	TPA1	+	83.08	74.5583	-60.3741	80.3466	66.7914	65.2629
1454	YER050C	RSM18	-	116.929	131.031	123.631	108.866	148.973	112.857
1455	YER051W	JHD1	+	19.3529	169.615	36.7	92.9231	67.4762	51.3333
1456	YER052C	HOM3	-	87.6362	106.781	10.7907	99.031	98.9644	93.4419
1457	YER053C	PIC2	-	225.481	128.3	118.513	113.478	138.75	72.2995
1458	YER053C-A	NA	-	371	393.847	341.154	347.577	327.353	323.286
1459	YER054C	GIP2	-	328.308	276.048	154.778	318.824	161.75	116.545
1460	YER055C	HIS1	-	119.447	114.17	54.6796	109.33	132.97	116.662
1461	YER056C	FCY2	-	1010.19	1033.51	981.338	982.177	994.452	939.71
1462	YER056C-A	RPL34A	-	84.5793	84.5429	76.4134	83.6176	85.1242	85.6189
1463	YER057C	HMF1	-	110.262	96.4203	87.2727	94.948	93.8295	111.828
1464	YER058W	PET117	+	133.36	133.75	90.7333	131.032	181.121	177.562
1465	YER059W	PCL6	+	89.1111	168.162	60.52	78.4565	42.9286	5.04878
1466	YER060W	FCY21	+	112.613	119.213	18.7568	63.6731	98.7407	97.1552
1467	YER060W-A	FCY22	+	116.75	93.4667	87.5	100.5	151.667	137
1468	YER061C	CEM1	-	297.489	369.552	117.137	239.261	173.123	265.293
1469	YER062C	GPP2	-	139.639	160.506	129.634	166.955	155.853	156.924
1470	YER063W	THO1	+	169.253	181.482	146.932	169.718	185.614	188.895
1471	YER064C	VHR2	-	259.294	300.914	144.541	214.36	204.451	227.952
1472	YER065C	ICL1	-	99.0909	118.783	-7.21951	-35.0682	-31	117.222
1473	YER066W	RRT13	+	147.833	148.429	100.643	135.917	123.368	115.5
1474	YER067W	RGI1	+	97.0356	85.628	74.1503	81.5737	82.5612	92.0472
1475	YER068W	MOT2	+	53.7126	84.3973	-59.2921	65.8095	78.7551	70.8889
1476	YER069W	ARG56	+	62.9967	134.896	-66.7248	88.8137	-32.3762	10.3654
1477	YER070W	RNR1	+	134.084	130.893	22.542	165.631	158.424	167.306
1478	YER071C	TDA2	-	194.125	212.161	171.682	176.016	186.097	208.455
1479	YER072W	VTC1	+	133.412	136.827	122.243	132.955	136.891	134.698
1480	YER073W	ALD5	+	185.147	177.662	101.661	181.493	163.81	172.168
1481	YER074W	RPS24A	+	101.772	103.32	90.5119	100.396	103.453	101.789
1482	YER074W-A	YOS1	+	92.98	96.3765	93.6473	95.9548	110.982	97.8104
1483	YER075C	PTP3	-	81.8727	75.775	-132.333	37	-32.7551	-51.0789
1484	YER076C	NA	-	212	237.095	147	195.462	181.897	239.533
1485	YER077C	MRX1	-	60.6207	4.95588	-71.3692	-32.6515	-43.7091	-71.6875
1486	YER078C	ICP55	-	60.726	52.66	-25.2778	62.5806	63.8676	108.333
1487	YER079W	NA	+	185.043	191.923	151.889	206.286	212.405	316.463
1488	YER080W	AIM9	+	87.6526	34.9623	-70.4505	104.691	70.1833	54.9626
1489	YER081W	SER3	+	116.872	124.403	30.9336	119.364	90.3189	49.2353
1490	YER082C	UTP7	-	86.0922	67.9221	-43.6036	42.709	50.7021	20.0545
1491	YER083C	GET2	-	660.005	836.544	584.957	600.324	822.898	905.569
1492	YER084W	NA	+	184.7	156.429	182.143	169.7	212.632	172.308
1493	YER086W	ILV1	+	105.229	119.214	-5.11307	117.074	112.063	102.661
1494	YER087C-B	SBH1	-	215.841	210.27	195.245	209.929	210.246	206.856
1495	YER087W	AIM10	+	121.688	124.053	46.25	51.963	77.6	138.625
1496	YER088C	DOT6	-	53.2281	122.832	50.7706	123.906	103.381	105.178
1497	YER089C	PTC2	-	195.248	234.044	213.68	272.554	351.267	301.157
1498	YER090W	TRP2	+	97.9053	92.713	-6.73158	78.8218	76.5094	86.6957
1499	YER091C	MET6	-	190.027	169.02	-3.60927	187.987	188.26	177.963
1500	YER092W	IES5	+	213.914	214.93	218.602	225.508	208.084	215.165
1501	YER093C	TSC11	-	-103.314	-178.486	-596.176	-222.121	-200.722	-450.909
1502	YER093C-A	AIM11	-	123.838	121.821	104.286	124.511	122.345	111.441
1503	YER094C	PUP3	-	149.233	148.016	110.632	145.81	161.223	159.074
1504	YER095W	RAD51	+	238.874	203.587	75.6383	195.079	177.681	266.662
1505	YER096W	SHC1	+	79.2222	130.3	144.571	205.222	57.4444	174.471
1506	YER098W	UBP9	+	310.12	101.318	-233.103	197.806	-2.82609	72.64
1507	YER099C	PRS2	-	126.85	90.1786	19.9679	89.4545	91.0157	137.232
1508	YER100W	UBC6	+	98.8251	102.684	68.0432	90.3274	100.421	103.821
1509	YER101C	AST2	-	73.8438	85.0357	-7.52	81.1071	81.2439	94.2812
1510	YER102W	RPS8B	+	117.218	115.771	118.292	129.87	114.966	116.885
1511	YER103W	SSA4	+	185.929	117.673	55.7273	126.879	137.807	183.985
1512	YER104W	RTT105	+	426.571	323.769	347.44	529.091	629.769	294.609
1513	YER105C	NUP157	-	252.264	-58.7027	-424.014	-204.349	-64.0579	-45.7379
1514	YER107C	GLE2	-	123.064	116.796	80.165	106.862	110.229	126.333
1515	YER110C	KAP123	-	64.5179	70.2879	-183.526	69.4485	71.2267	60.8865
1516	YER111C	SWI4	-	-46.6102	4.53846	-275	19.5	-44.2444	-99.8333
1517	YER112W	LSM4	+	87.8485	93.7372	69.0331	98.6571	95.0657	85.0841
1518	YER113C	TMN3	-	14.8148	-12.1094	-73.931	54.6271	-94.2903	36.1282
1519	YER114C	BOI2	-	248.015	300.576	-287.954	217.77	274.078	287.154
1520	YER115C	SPR6	-	103.087	400.647	64.7857	133.615	110.353	473.929
1521	YER116C	SLX8	-	823.078	1117.69	653.696	681.725	768.237	1045.58
1522	YER117W	RPL23B	+	74.2373	76.8306	62.7419	73.9645	80.4166	79.292
1523	YER118C	SHO1	-	161.859	171.805	103.451	121.027	162.99	148.281
1524	YER119C	AVT6	-	201.769	121.974	13.5476	34.5962	51.4615	69.6061
1525	YER120W	SCS2	+	118.179	124.106	81.048	110.279	145.258	135.185
1526	YER121W	NA	+	107.091	116.769	114.286	108.964	158.294	130.45
1527	YER122C	GLO3	-	78.2872	59.2273	16.7344	66.784	100.58	57.6959
1528	YER123W	YCK3	+	357.629	337.574	124.25	321.027	278.4	245.413
1529	YER124C	DSE1	-	248.255	263.495	187.026	244.146	254.427	230.09
1530	YER125W	RSP5	+	318.22	271	75.2814	255.933	273.568	284.632
1531	YER126C	NSA2	-	172.032	163.263	107.008	165.571	172.605	182.498
1532	YER127W	LCP5	+	129.298	113.86	53.0349	77.0909	115.198	104.435
1533	YER128W	VFA1	+	1322.03	892.237	1458.1	1474.16	706.07	582.027
1534	YER129W	SAK1	+	91.767	70.2308	-121.8	-61.469	-131.727	-170.326
1535	YER130C	COM2	-	138.617	181.45	82.6587	137.5	121.244	128.5
1536	YER131W	RPS26B	+	268.369	318.977	353.379	383.735	422.821	401.676
1537	YER132C	PMD1	-	-47.5467	-290.812	-776.551	-207.844	-348.651	-222.72
1538	YER133W	GLC7	+	395.917	394.639	308.037	382.084	332.866	324.298
1539	YER134C	NA	-	241.463	249.149	204.619	315.175	243.292	242.094
1540	YER135C	NA	-	908.903	909.483	857	913.478	908.812	891.693
1541	YER136W	GDI1	+	304.881	254.664	183.495	251.705	262.763	210.742
1542	YER137C	NA	-	167.611	167.846	148.737	168.862	161.283	176.636
1543	YER138W-A	NA	+	347.143	355.02	350.81	329.921	391.85	378.006
1544	YER139C	RTR1	-	529.759	435.6	383.064	349.108	367.833	501.731
1545	YER140W	EMP65	+	1071.54	1306.58	978.756	1275.44	1206.42	1279.35
1546	YER141W	COX15	+	158.58	199.615	34.5727	123.358	206.781	188.257
1547	YER142C	MAG1	-	37.9688	71.4571	3.93103	117.333	68.4902	153.625
1548	YER143W	DDI1	+	161.449	158.974	100.294	127.059	194.133	205.49
1549	YER144C	UBP5	-	-158.559	-88.0105	-271.407	-189.014	-254.857	-455.294
1550	YER145C	FTR1	-	88.3166	87.1737	53.8991	72.67	77.6935	59.1095
1551	YER145C-A	NA	-	115.667	-36.0667	-107.667	-87.4	-176.286	-162
1552	YER146W	LSM5	+	96.8706	101.634	82.6174	86.6498	89.713	106.159
1553	YER147C	SCC4	-	66.12	70.5882	-37.3846	69.2619	62.7083	63.6829
1554	YER148W	SPT15	+	190.137	181.462	158.991	177.83	184.626	186.652
1555	YER149C	PEA2	-	60	76.9268	20.6719	55.6471	57.6923	38.88
1556	YER150W	SPI1	+	144.37	137.176	130.353	138.2	151.253	154.983
1557	YER151C	UBP3	-	32.4261	66.4	-152.418	74.1895	-37.186	-28.8559
1558	YER152C	NA	-	360.493	651.971	34.012	89.8119	455.763	286.453
1559	YER153C	PET122	-	1988.21	2408.44	1086.14	1559.4	1752.06	2282.18
1560	YER154W	OXA1	+	59.7467	59.558	25.5676	35.7521	34.3293	60.586
1561	YER155C	BEM2	-	-76.7029	-34.9362	-539.42	-215.311	-432.968	-359.807
1562	YER156C	MYG1	-	84.5513	99.3468	55.0151	105.643	101.031	99.0854
1563	YER157W	COG3	+	-2.53488	-39.3529	-326.804	-165.864	-336.022	-91.2222
1564	YER158C	NA	-	61.4906	112.216	-6.17391	105.419	116.148	62.7925
1565	YER159C	BUR6	-	142.439	137.277	150.898	142.57	130.288	120.236
1566	YER161C	SPT2	-	240.143	252.906	181.97	236.443	254.212	222.939
1567	YER162C	RAD4	-	168.593	178.864	30.32	78.2	31.3462	-24.96
1568	YER163C	GCG1	-	71.7172	90.6477	62.7168	80.534	87.1463	69.7899
1569	YER164W	CHD1	+	89.6842	-88.9259	-314.32	100.255	-80.4384	-123.425
1570	YER165W	PAB1	+	110.307	119.083	-17.9379	116.978	119.628	106.627
1571	YER166W	DNF1	+	-77.9551	-182.139	-372.111	-157.632	-262.079	-303.045
1572	YER167W	BCK2	+	133.153	48.2188	-72.7797	58.8	30.7266	-33.68
1573	YER168C	CCA1	-	26.043	94.4429	-0.342466	50.2976	7.73333	40.6071
1574	YER169W	RPH1	+	194.162	211.032	71.2727	185.776	59.9474	140.343
1575	YER170W	ADK2	+	969.367	1255.37	1054.38	1169.57	924.394	1040.47
1576	YER171W	RAD3	+	-263.269	-236.643	-331.361	-171.32	-401.354	-388.367
1577	YER172C	BRR2	-	-340.234	-387.97	-804.702	-526.449	-775.718	-845.333
1578	YER173W	RAD24	+	10.2	65.48	-252.762	-98.8571	-84.1765	-109.5
1579	YER174C	GRX4	-	86.95	152.951	81.3889	63.0862	57.6957	126.862
1580	YER175C	TMT1	-	582.253	702.067	311.576	460.622	367.512	411.938
1581	YER175W-A	NA	+	2101.78	1820.17	804.353	1291.87	1086.93	1009.57
1582	YER176W	ECM32	+	359.176	204.686	-151.545	-78.5357	-38.4	103.216
1583	YER177W	BMH1	+	163.679	160.255	122.423	159.143	150.979	161.305
1584	YER178W	PDA1	+	110.014	118.337	28.6636	107.365	111.653	103.943
1585	YER179W	DMC1	+	75.1429	104.308	55.35	110.385	311.8	72.125
1586	YER180C	ISC10	-	45.6571	43.6667	2	28.875	45.2	30.1
1587	YER180C-A	SLO1	-	1115.68	1087.97	794.487	907.571	993.424	991.842
1588	YER182W	FMP10	+	74	61.6279	52.5	75.5227	87.3077	65.2826
1589	YER183C	FAU1	-	68.5976	73.1667	56.6081	80.7527	82.6602	83.3816
1590	YER184C	TOG1	-	-117.459	-76.0714	-296.469	-118.216	-430.462	-153.69
1591	YER185W	PUG1	+	-13.1154	29.15	-27.9	-81.5556	19	30
1592	YER186C	NA	-	327.06	236.466	96.5806	194.553	243.756	214.194
1593	YER187W	NA	+	709.125	211.889	174.125	411.4	192.667	308.3
1594	YFL001W	DEG1	+	2.275	6.41667	-33.5476	-4.74286	-67.9512	-64.05
1595	YFL002C	SPB4	-	129.226	119.657	-9.48246	111.887	57.7209	25.5321
1596	YFL004W	VTC2	+	32.6585	-42.5022	-158.168	19.0048	-16.3227	-58.1582
1597	YFL005W	SEC4	+	201.928	209.958	175.524	201.489	202.936	196.762
1598	YFL007W	BLM10	+	-255.056	-625.225	-862.029	-407.636	-611.744	-458.362
1599	YFL008W	SMC1	+	120.015	16.4242	-308.103	-7.16129	-37.7534	-150.081
1600	YFL009W	CDC4	+	81.8812	93.9082	-162.876	66.8913	28.2069	4.51429
1601	YFL010C	WWM1	-	153.843	149.578	113.508	148.122	149.9	159.247
1602	YFL013C	IES1	-	86.1061	92.4627	-88.8718	28.0476	107.716	119.967
1603	YFL014W	HSP12	+	188.33	185.85	175.299	188.754	187.344	187.447
1604	YFL016C	MDJ1	-	89.5455	99.3409	-0.015873	101.407	87.4923	59.3279
1605	YFL017C	GNA1	-	104.723	119.797	98.1579	130.083	117.636	96.0357
1606	YFL017W-A	SMX2	+	69.3793	73.9277	64.0353	66.0303	68.8	64.7368
1607	YFL018C	LPD1	-	55.432	55.0748	-22.395	68.4828	53.9825	46.4398
1608	YFL020C	PAU5	-	132.385	120.6	133.429	137	149.429	220
1609	YFL021W	GAT1	+	-46.0247	12.7808	-41.8732	15.6354	32.2879	102.17
1610	YFL022C	FRS2	-	82.8238	79.8057	25.1966	89.9443	67.1063	89.5149
1611	YFL023W	BUD27	+	75.806	38.8679	-132.891	57.2245	19.2857	-38.9344
1612	YFL024C	EPL1	-	393.414	375.583	278.627	280.415	254.485	322.839
1613	YFL025C	BST1	-	30.0952	-183.8	-235.5	-428.847	-246.111	-292.8
1614	YFL026W	STE2	+	-3	-193.3	-243.286	91.8	-304	-323.5
1615	YFL027C	GYP8	-	-20.1852	96.55	42.9583	106.391	232.133	-27.1818
1616	YFL028C	CAF16	-	65.5103	54.4565	38.2462	77.1825	64.9926	83.6635
1617	YFL029C	CAK1	-	74.1489	62.2439	24.8636	60.7838	40.963	48.2432
1618	YFL030W	AGX1	+	84.5556	37.9412	84.7	77.2	88.0455	80.1818
1619	YFL031W	HAC1	+	392.026	394.252	325.284	375.665	379.814	375.872
1620	YFL033C	RIM15	-	53.3889	-6.48077	-533.632	1.45833	-246.532	-279.022
1621	YFL034C-A	RPL22B	-	76.7062	79.7048	55.16	56.4444	77.856	75.7833
1622	YFL034C-B	MOB2	-	150.956	149.716	102.194	146.51	128.071	129.641
1623	YFL034W	MIL1	+	-46.9773	-200.085	-252.225	-82.2821	-97.7609	25.9
1624	YFL036W	RPO41	+	48.13	-40.4643	-345.962	-73.7802	-166.215	-230.791
1625	YFL037W	TUB2	+	197.756	192.795	134.137	198.467	200.154	190.26
1626	YFL038C	YPT1	-	101.19	107.656	79.6701	102.561	99.7292	103.991
1627	YFL039C	ACT1	-	101.722	102.15	27.1997	96.4931	124.358	128.916
1628	YFL041W	FET5	+	140.882	110.829	-1.06452	98.7143	139.316	86.1026
1629	YFL042C	LAM5	-	57.24	151.48	-40.5818	138.667	244.136	69.1935
1630	YFL044C	OTU1	-	1089.95	1084.97	1027.86	1084.15	1050.03	1067.63
1631	YFL045C	SEC53	-	133.224	138.754	109.433	128.98	131.017	123.294
1632	YFL046W	FMP32	+	145.407	147.986	103.078	148.424	123.043	144.688
1633	YFL047W	RGD2	+	-2.01316	-140.443	-227.982	-52.7742	-194.632	22.0612
1634	YFL048C	EMP47	-	93.6098	108.209	9.36129	77.1034	104.844	95.3514
1635	YFL049W	SWP82	+	117.95	117.852	59.5679	106.532	116.688	67.5893
1636	YFL050C	ALR2	-	141.067	79.3684	4.04348	34.1053	-13.6667	-118.429
1637	YFL051C	NA	-	99.6364	697.5	177.167	1055.86	218.75	145.667
1638	YFL052W	ZNF1	+	1006.12	727.417	625.182	503.486	1068.84	1099.95
1639	YFL054C	AQY3	-	-23.9474	56.2273	-126.471	-122.791	18.775	-23.5385
1640	YFL055W	AGP3	+	475.273	261.286	203	223.4	84.4286	335.125
1641	YFL058W	THI5	+	91.8	126	126	123	144.545	101.25
1642	YFL059W	SNZ3	+	158.64	140.72	84.913	133.267	167.522	151.609
1643	YFL060C	SNO3	-	444.1	1597.12	130.2	216.778	1144.93	654.125
1644	YFR001W	LOC1	+	76.7052	77.2749	59.2387	75.3455	77.4007	67.4927
1645	YFR002W	NIC96	+	28.6381	-67.22	-160.782	-27.541	-62.5966	-48.0109
1646	YFR003C	YPI1	-	124.308	154.042	126.58	143.211	151.12	139.392
1647	YFR004W	RPN11	+	54.713	73.7946	40.0294	68.0622	67.6267	65.4928
1648	YFR005C	SAD1	-	182.143	189.545	148.106	205.435	192.056	147.621
1649	YFR006W	NA	+	72.4476	66.99	29.6667	51.8496	38.037	31.7545
1650	YFR007W	YFH7	+	37.1429	50.2	55.2353	137.839	304.387	58.25
1651	YFR008W	FAR7	+	354.036	417.24	281.967	404.261	388.538	415.16
1652	YFR009W	GCN20	+	76.3033	109.122	-133.687	35.6114	86.0231	71.8879
1653	YFR010W	UBP6	+	76.3388	86.6935	8.41538	43.1803	80.1318	51.878
1654	YFR011C	MIC19	-	150.323	164.562	149.658	166.607	167.096	161.333
1655	YFR013W	IOC3	+	71.2703	133.565	-21.5714	120.474	105.552	-10.9516
1656	YFR014C	CMK1	-	183.783	167.042	-14.0267	21.8857	89.8554	58.3662
1657	YFR015C	GSY1	-	100.435	68.5789	-112.824	-99.9292	14.7822	-61.2029
1658	YFR016C	AIP5	-	47.6458	11.9155	-207.35	-51.4423	26	144.099
1659	YFR017C	IGD1	-	79.6286	53.9778	77.55	69.4062	51.4639	60.3976
1660	YFR018C	NA	-	128.455	156.053	85.442	144.892	148.692	142.658
1661	YFR019W	FAB1	+	-157.263	-429.189	-1171.6	-676.256	-644.273	-796.537
1662	YFR020W	CSS2	+	233.286	227.692	140.487	250.621	244.167	214
1663	YFR021W	ATG18	+	135.378	128.97	-5.21622	97.6512	127.86	85.0968
1664	YFR022W	ROG3	+	126.065	-118.75	-240.308	-169	-79.1379	-216.857
1665	YFR023W	PES4	+	105.333	94.3333	-66.4	100	-58.5	104
1666	YFR024C-A	LSB3	-	213.057	180.923	74	140.776	162.369	170.237
1667	YFR025C	HIS2	-	114.083	93.5417	21.2626	123.744	82.5543	104.662
1668	YFR027W	ECO1	+	129.8	126.533	125.083	64.8	130.692	89.1667
1669	YFR028C	CDC14	-	23.0789	50.2297	-8.09589	33.8082	31.9767	56.4833
1670	YFR029W	PTR3	+	182.385	182.714	42.5385	-83.5217	161.938	310.821
1671	YFR030W	MET10	+	32.9153	36.3226	-177.744	-21.9569	-10.3889	58.5349
1672	YFR031C	SMC2	-	-195.323	-150.952	-521.707	-73.9796	-210.146	-147.7
1673	YFR031C-A	RPL2A	-	94.114	98.4785	65.8595	102.419	97.7114	96.234
1674	YFR032C	RRT5	-	177.526	146.571	293.625	98.7143	336.15	96.3636
1675	YFR032C-A	RPL29	-	99.6278	101.044	96.273	98.154	100.984	98.4206
1676	YFR032C-B	MIN10	-	552.218	555.637	548.487	548.475	551.601	557.157
1677	YFR033C	QCR6	-	133.882	133.713	114.288	138.98	132.902	136.703
1678	YFR034C	PHO4	-	797.761	782.747	728.433	791.282	762.248	797.609
1679	YFR036W	CDC26	+	127.444	128.357	89.0909	134.333	130.387	125.63
1680	YFR037C	RSC8	-	106.684	114.647	-14.5276	74.6984	100.205	121.259
1681	YFR038W	IRC5	+	85.5854	38.2391	-213.788	35.24	-22.4925	16.9574
1682	YFR039C	OSW7	-	64.1129	28.625	-82.5753	58.5333	33.102	53.9792
1683	YFR040W	SAP155	+	12.4103	-57.781	-164.541	49.9091	-11.903	-155.976
1684	YFR041C	ERJ5	-	111.266	111.655	68.0208	113.077	129.426	76.9811
1685	YFR042W	KEG1	+	92.8605	85.68	105.667	124.825	127.58	69.2619
1686	YFR043C	IRC6	-	60.7308	61.913	16.3103	8.58333	51.0882	57.0286
1687	YFR044C	DUG1	-	85.1944	77.1028	9.29592	90.4182	115.976	92.7821
1688	YFR045W	MRX20	+	63.7727	118.167	9.67742	92.7692	81.9111	71.6176
1689	YFR046C	CNN1	-	125.348	309.25	51.3913	93.2917	134.75	357.682
1690	YFR047C	BNA6	-	174.968	209.871	127.158	175.758	164.314	218.373
1691	YFR048W	RMD8	+	15.6296	66.6604	-42.8929	-25.102	3.27083	20.3158
1692	YFR049W	KGD4	+	137.824	130.439	121.178	132.288	132.517	128.415
1693	YFR050C	PRE4	-	118.213	130.362	90.223	128.492	115.57	129.179
1694	YFR051C	RET2	-	24.582	16.1534	-28.2629	30.8768	42.1885	43.2967
1695	YFR052W	RPN12	+	88.4105	92.0427	61.3487	71.0641	94.8561	79.4534
1696	YFR053C	HXK1	-	119.941	94.6646	19.9761	112.031	93.2574	98.1256
1697	YFR055W	IRC7	+	480.115	450.006	368.262	465.16	465.837	429.721
1698	YGL001C	ERG26	-	161.97	133.931	78.9053	119.848	125.777	131.99
1699	YGL002W	ERP6	+	183.573	189.279	153.81	151.311	173.186	150.22
1700	YGL003C	CDH1	-	98.5	123.481	-93.6122	-7.63265	188.635	75.5
1701	YGL004C	RPN14	-	40.4444	-11.303	38.2381	5.74359	235.71	98.6957
1702	YGL005C	COG7	-	202.98	213.366	194.017	207.818	191.436	184.714
1703	YGL006W	PMC1	+	-811.774	-521.903	-983.417	-652.157	-819.652	-802.544
1704	YGL006W-A	NA	+	3191	3092	1129.5	2715.83	2111.56	2557.67
1705	YGL007C-A	NA	-	3344.33	3357.06	2855.63	3387.58	3311.3	3295.11
1706	YGL007W	BRP1	+	679.333	752.364	809.286	606.667	827.714	706.5
1707	YGL008C	PMA1	-	423.584	422.622	217.837	424.611	402.945	393.296
1708	YGL009C	LEU1	-	120.859	121.82	-8.89764	101.992	117.407	118.618
1709	YGL010W	MPO1	+	164	181.417	131.85	188	163.786	171.913
1710	YGL011C	SCL1	-	171	196.777	125.636	136.897	173.733	182.969
1711	YGL012W	ERG4	+	74.204	80.7459	-2.70144	60.2011	57.2627	66.3516
1712	YGL013C	PDR1	-	71.5397	68.7049	-107.475	-100.736	-101.197	-26.5217
1713	YGL014W	PUF4	+	27.841	39.8937	-72.4518	22.0621	23.8798	45.0903
1714	YGL016W	KAP122	+	72.2366	-101.934	-240.558	-127.346	-124.366	30.8955
1715	YGL017W	ATE1	+	192.231	212.656	121.919	29.9459	104.154	55.3636
1716	YGL018C	JAC1	-	163.167	243.968	175.406	282.273	208.4	166.654
1717	YGL019W	CKB1	+	93.4765	103.051	100.533	98.2222	88.1311	78.5962
1718	YGL020C	GET1	-	72.8037	52.6705	62.0984	75.0467	75.95	52.5682
1719	YGL021W	ALK1	+	79.3238	47.3836	-72.375	8.16832	52.275	-17.013
1720	YGL022W	STT3	+	103.185	76.5989	-53.7143	84.391	76.0728	121.916
1721	YGL023C	PIB2	-	98.2987	67.9206	2.35849	80.8732	85.5797	96.4154
1722	YGL025C	PGD1	-	83.641	48.7143	28.9706	72.8974	105.889	154.104
1723	YGL026C	TRP5	-	41.9435	77.2045	-62.721	56.8564	77.6483	155.683
1724	YGL027C	CWH41	-	65.8073	-62.4369	-232.788	-8.14474	-214.19	25.75
1725	YGL028C	SCW11	-	257.067	270.162	181.065	226.816	228.324	226.372
1726	YGL029W	CGR1	+	186.006	183.402	163.821	177.894	175.59	175.629
1727	YGL030W	RPL30	+	98.3125	98.7277	92.1914	97.6193	98.1356	99.92
1728	YGL031C	RPL24A	-	98.8733	101.535	92.8404	102.655	98.4974	97.5973
1729	YGL033W	HOP2	+	197.714	191.25	182.923	151.9	348.625	237.6
1730	YGL035C	MIG1	-	110.484	130.559	-8.6087	63.8824	81.3667	91.6296
1731	YGL036W	VIR1	+	-95.9703	-168.882	-280.841	-56.7094	-242.678	-192.731
1732	YGL037C	PNC1	-	118.317	128.571	91.6882	124.564	127.041	130.046
1733	YGL038C	OCH1	-	170.127	147.377	107.809	149.764	148.809	137.583
1734	YGL039W	NA	+	101.004	94.5123	45.9429	85.8	73.7644	94.8594
1735	YGL040C	HEM2	-	206.799	201.253	118.63	196.635	179.994	205.752
1736	YGL041W-A	DPC13	+	149.5	143.625	111.395	139.638	156.695	142.283
1737	YGL043W	DST1	+	340.565	329.691	385.38	369.029	382.665	332.93
1738	YGL044C	RNA15	-	194.711	199.81	118.793	176.187	225.656	199.194
1739	YGL045W	RIM8	+	182.175	175.436	19.9024	138.759	73.7273	92.0364
1740	YGL047W	ALG13	+	1267.45	994.912	1065.46	1089.72	927.904	1296.24
1741	YGL048C	RPT6	-	88.4886	111.261	29.9825	92.251	90.961	99.8814
1742	YGL049C	TIF4632	-	89.4889	164.306	-85.832	121.96	37.3961	103.842
1743	YGL050W	TYW3	+	114.881	130.576	56.1948	77.7209	144.22	35.3273
1744	YGL053W	PRM8	+	273.395	175.367	197.125	193.132	263.792	187.143
1745	YGL054C	ERV14	-	304.678	305.109	287.406	308.626	305.231	301.025
1746	YGL055W	OLE1	+	201.107	206.221	118.099	198.68	182.897	188.69
1747	YGL056C	SDS23	-	80.1882	80.9459	-18.8603	50.669	76.9935	37.4336
1748	YGL057C	GEP7	-	131.538	168.024	154.762	178.188	162.861	131.208
1749	YGL058W	RAD6	+	346.179	350.408	305.47	342.766	342.059	331.684
1750	YGL059W	PKP2	+	55.1702	19.1429	-55.0167	23.9846	69.7833	-33.3415
1751	YGL060W	YBP2	+	1093.58	920.263	621.618	832.794	818.5	914.517
1752	YGL061C	DUO1	-	117.879	123.735	67.25	94.1724	85.2826	102.75
1753	YGL062W	PYC1	+	36.4074	17.9766	-207.223	18.6433	34.3919	58.7665
1754	YGL063W	PUS2	+	1663.27	2053.9	1683.43	2253.75	2623.38	2701.42
1755	YGL064C	MRH4	-	54.6667	52.9143	-91.2368	96.5652	61.6383	-38.9512
1756	YGL065C	ALG2	-	53.9259	17.1636	-50.6462	6.34286	23.7692	6.36538
1757	YGL066W	SGF73	+	284.196	276.961	73.2676	85.5833	302.306	194.76
1758	YGL067W	NPY1	+	509.476	325.957	459.602	416.717	432.703	535.012
1759	YGL068W	MNP1	+	163.266	160.804	192.417	162.944	143.954	140.817
1760	YGL070C	RPB9	-	277.985	288.798	256.06	292.695	274.763	260.737
1761	YGL071W	AFT1	+	68.1875	62.949	-2.0641	13.8469	30.1111	60.3412
1762	YGL073W	HSF1	+	-41.125	-27.5217	-257.339	-229.872	-99.6154	-174.047
1763	YGL075C	MPS2	-	455.389	484.573	351.385	422.431	420.439	419.302
1764	YGL076C	RPL7A	-	104.993	120.652	65.2004	108.284	100.402	97.6153
1765	YGL077C	HNM1	-	1055.41	985.423	887.27	1079.63	1003.07	1236.41
1766	YGL078C	DBP3	-	175.215	163.022	40.5501	162.173	152.023	156.506
1767	YGL079W	KXD1	+	117.841	97.1915	66.5405	84.35	87.0189	184.93
1768	YGL080W	MPC1	+	256.139	257.285	226.2	256.34	258.758	256
1769	YGL081W	NA	+	568.552	790.844	806.733	726.897	784.625	612.467
1770	YGL082W	NA	+	282.482	305.18	116.042	295.299	233.438	204.267
1771	YGL083W	SCY1	+	55.6964	84.5143	-57.2791	35.5152	-143.488	102.533
1772	YGL084C	GUP1	-	126.258	88.717	42.8367	40.6575	30.0645	35.5536
1773	YGL085W	LCL3	+	213.2	143.275	49.8148	137.857	111.828	89.7667
1774	YGL086W	MAD1	+	156.8	46.7647	-211.159	2.36842	109.721	34.8197
1775	YGL087C	MMS2	-	104.708	123.746	97.1348	114.026	112.225	114.888
1776	YGL088W	NA	+	131.419	120.41	120.956	135.177	202.933	97.4783
1777	YGL089C	MF(ALPHA)2	-	186.803	181.435	171.703	189.719	177.401	176.856
1778	YGL090W	LIF1	+	678.37	806.1	309.763	301.417	589.862	793.667
1779	YGL091C	NBP35	-	141.053	147.683	70.1607	119.297	117.686	134.115
1780	YGL092W	NUP145	+	19.5344	-23.6984	-253.956	9.58772	10.0861	-67.6121
1781	YGL093W	SPC105	+	-10.5897	271.593	-123.065	7.69231	-103.226	-109.375
1782	YGL094C	PAN2	-	92.3934	50.4407	-227.385	-14.4667	-23.0816	40.3191
1783	YGL095C	VPS45	-	28.2593	-24.1169	-111.897	23.0984	-161.292	-100.105
1784	YGL096W	TOS8	+	496.667	628.093	503.511	620.179	585.581	433
1785	YGL097W	SRM1	+	72.3712	86.4629	23.3654	161.815	96.7484	96.0308
1786	YGL098W	USE1	+	622.371	492.522	360	335.303	553.745	560.567
1787	YGL099W	LSG1	+	39.9167	46.7764	-105.566	37.7639	18.266	-4.26994
1788	YGL100W	SEH1	+	82.1034	98.0686	70.8846	103.14	86.875	99.9747
1789	YGL101W	YGK1	+	231.297	233.822	243.225	231.535	225.097	193.93
1790	YGL103W	RPL28	+	74.4697	77.8342	61.752	75.0742	73.5008	73.0654
1791	YGL104C	VPS73	-	26	103.8	68.5	141.062	55.2	119.545
1792	YGL105W	ARC1	+	97.0777	94.6583	33.1252	77	80.7938	87.8384
1793	YGL106W	MLC1	+	206.355	217.701	203.218	223.505	213.659	211.571
1794	YGL107C	RMD9	-	-21.4844	38.9	-85.5319	58.9265	-7.57143	-8.16667
1795	YGL108C	NA	-	831.984	868	644.763	909.121	871.198	678.107
1796	YGL110C	CUE3	-	21.3421	83.7292	16.0278	78.9464	62.1452	15.1944
1797	YGL111W	NSA1	+	162.56	153.894	106.315	158.985	154.671	141.306
1798	YGL112C	TAF6	-	106.875	132.309	1.52222	121.282	106.598	99.7571
1799	YGL113W	SLD3	+	-44.5854	104.781	-146.067	-5.72973	199.387	44.2593
1800	YGL114W	NA	+	90.5714	2.41772	-191.025	-56.321	-13.1619	40.641
1801	YGL115W	SNF4	+	86.6338	64.4091	33.6512	54.4397	70.3169	57.3664
1802	YGL116W	CDC20	+	145.869	78.1579	3.53571	95.5	49.3396	14.6053
1803	YGL117W	ARO5	+	400.764	477.442	253.927	258.892	283.304	331.184
1804	YGL119W	COQ8	+	91.6346	76.8182	0.444444	33.8936	52.9825	37.3111
1805	YGL120C	PRP43	-	87.4216	75.4829	-2.47203	79.7212	102.285	67.6207
1806	YGL121C	GPG1	-	399.452	199.865	183.981	313.973	227.12	224.807
1807	YGL122C	NAB2	-	132.734	126.255	59.3408	122.198	130.158	148.05
1808	YGL123W	RPS2	+	76.6786	79.3822	54.0916	76.5296	79.5264	76.9549
1809	YGL124C	MON1	-	-25.0328	101.704	-158.057	-5.6	-28.1455	-127.833
1810	YGL125W	MET13	+	346.683	334.968	201.401	338.915	284.611	233.87
1811	YGL126W	SCS3	+	199.14	241.058	97.7054	234.238	266.303	213.559
1812	YGL127C	SOH1	-	141.58	137.831	123.4	191.827	159.764	123.467
1813	YGL128C	CWC23	-	684.367	607.233	583.194	648.207	786.822	963.848
1814	YGL129C	RSM23	-	114.879	119.259	77.5652	123.151	130.394	148.538
1815	YGL130W	CEG1	+	143.538	103.703	21.2857	112.154	134.75	108.769
1816	YGL131C	SNT2	-	90.037	-129.029	-440.333	308.781	-162.6	-116.675
1817	YGL133W	ITC1	+	-24.0364	-49.9655	-313.625	11	-48.25	-55.0185
1818	YGL134W	PCL10	+	111.286	97.5152	25.381	12.4167	92.2647	152.714
1819	YGL135W	RPL1B	+	85.25	90.0043	67.2491	86.1558	84.2464	85.2494
1820	YGL136C	MRM2	-	122.348	106.929	75.76	101.556	47.0789	121.562
1821	YGL137W	SEC27	+	146.257	140.701	-37.02	179.738	210.858	221.656
1822	YGL139W	FLC3	+	278.198	237.364	25.1375	178.562	178.905	245.667
1823	YGL140C	NA	-	197.584	91.5124	-126.175	145.703	11.9318	-14.641
1824	YGL141W	HUL5	+	-69	-43.0152	-349.831	-37.6275	48.8806	-53.3704
1825	YGL142C	GPI10	-	48.8364	-36.3333	-100.066	-77.9649	-167.579	-231.121
1826	YGL143C	MRF1	-	118.789	168.444	29.0882	103.463	103.911	78.5714
1827	YGL144C	ROG1	-	47.9143	36.2326	-140.444	6.21212	-3.40541	-18.0217
1828	YGL145W	TIP20	+	-69.2083	22.069	-109.758	21.4722	56.4318	-44.8511
1829	YGL146C	RRT6	-	775.579	959.306	635.02	923.365	951.422	926.607
1830	YGL147C	RPL9A	-	109.321	116.377	97.6548	129.707	111.746	110.441
1831	YGL148W	ARO2	+	86.2918	93.3034	34.6818	91.3046	105.526	93.9009
1832	YGL150C	INO80	-	74.4359	33.1596	-329.287	-118.105	-123.942	-95.6591
1833	YGL151W	NUT1	+	-141.509	-82.6923	-99.3571	-34.9804	-280.378	-209.283
1834	YGL153W	PEX14	+	39.5625	46.102	-26.3913	22.4889	34.6364	12.7647
1835	YGL154C	LYS5	-	2.21951	-3.75	-28.2121	-4.87097	-29.2295	22.1481
1836	YGL155W	CDC43	+	204.047	138.088	100.604	207.789	160.347	130.625
1837	YGL156W	AMS1	+	154.538	104.8	-305.774	-34.6667	-171.241	80.45
1838	YGL157W	ARI1	+	77.7233	69.8768	61.5591	72.3672	80.2124	85.8967
1839	YGL158W	RCK1	+	92.2368	122.923	75.7391	-30.6	63.8571	54.1176
1840	YGL159W	NA	+	306.633	142.415	185.128	116.145	235.274	232.857
1841	YGL160W	AIM14	+	-8.75862	10.3968	-55.8243	-68.2941	-77.3158	-77.4444
1842	YGL161C	YIP5	-	80.2045	123.839	42.4848	107.027	100.77	105.864
1843	YGL162W	SUT1	+	145.085	109.078	76.4419	99.5267	127.5	105.011
1844	YGL163C	RAD54	-	80.587	-87.8214	-150.821	-46.4722	-8.57447	-73.625
1845	YGL164C	YRB30	-	113.553	61.7419	-170.905	-25	58.0727	77.6346
1846	YGL166W	CUP2	+	145.596	156.238	127.53	155.928	157.298	154.179
1847	YGL167C	PMR1	-	-14.6564	42.3021	-179.978	73.663	-59.8852	-97.0353
1848	YGL169W	SUA5	+	128.065	100.058	73.1263	130.364	85.7069	100.619
1849	YGL171W	ROK1	+	82.2222	107.112	21.5586	76.1957	98.4967	119.866
1850	YGL172W	NUP49	+	99.1089	76.4524	10.6092	97.4096	173.494	135.473
1851	YGL173C	XRN1	-	-11.1478	-79.1126	-413.517	-20.166	-104.165	-94.9815
1852	YGL174W	BUD13	+	155.794	143.833	103.114	156	153.804	152.417
1853	YGL175C	SAE2	-	1763.07	1897.33	1616.75	1700.04	1543.69	1662.25
1854	YGL176C	NA	-	107.467	70.4	42.6765	20.0909	14.7586	-3.66038
1855	YGL178W	MPT5	+	319.804	182.659	-134.304	267.833	8.7619	-138.226
1856	YGL179C	TOS3	-	11.1944	-16.6047	-8.86047	-71.5205	-70.3636	21.9394
1857	YGL180W	ATG1	+	229.048	150.407	-199.862	103.458	87.2333	-61.7419
1858	YGL181W	GTS1	+	91.7627	98.6364	66.8085	97.093	115.682	112.965
1859	YGL184C	STR3	-	130.429	97.425	35.0579	88.5882	62.9	83.48
1860	YGL185C	NA	-	861.848	694.568	314.308	513.103	575.148	600.326
1861	YGL186C	TPN1	-	-17.6802	-5.27451	-69.7853	10.7871	-28.9735	-30.7389
1862	YGL187C	COX4	-	236.902	236.058	239.53	271.557	207.153	215.421
1863	YGL188C-A	NA	-	664.966	666.906	655.072	661.783	665.543	665.675
1864	YGL189C	RPS26A	-	70.4485	72.1029	61.5536	66.9736	70.8168	71.2403
1865	YGL190C	CDC55	-	37.2297	-11.248	64.3982	30.2342	-147.609	-91.5444
1866	YGL191W	COX13	+	146.971	145.222	155.216	166.669	177.306	172.645
1867	YGL192W	IME4	+	1183.06	1208.51	1172.4	1181.67	1258.75	1226
1868	YGL194C	HOS2	-	90.0256	78.2609	1.65	90.9474	74.8718	54.7619
1869	YGL194C-A	NA	-	143.625	143.8	146	149.487	152.731	150.095
1870	YGL195W	GCN1	+	-306.417	-396.067	-985.358	-205.537	-256.352	-382.107
1871	YGL196W	DSD1	+	71.6562	104.304	8.86765	85.1633	131.037	133.44
1872	YGL197W	MDS3	+	226.49	241.081	-636.448	210.597	-137.885	-12.9492
1873	YGL198W	YIP4	+	851.756	934.358	380.94	1217.84	548.728	428.776
1874	YGL200C	EMP24	-	99.3744	104.889	85.359	98.9728	98.7209	99.3618
1875	YGL201C	MCM6	-	84.8947	129.068	-153.714	44.413	33.7143	76.4462
1876	YGL202W	ARO8	+	89.9609	82.095	10.7201	71.6506	83.5676	77.8593
1877	YGL203C	KEX1	-	72.6207	31.9529	-175.484	57.9341	-32.028	66.9231
1878	YGL204C	NA	-	475.031	445.528	445.738	462.409	453.643	458.545
1879	YGL206C	CHC1	-	12.1916	164.91	-385.596	148.785	-119.456	67.2228
1880	YGL207W	SPT16	+	94.3098	120.473	-131.975	84.4733	65.2629	58.5778
1881	YGL208W	SIP2	+	271.9	771.182	-93.2692	513.423	291.583	231.292
1882	YGL209W	MIG2	+	161.766	164.597	88.3758	125.26	163.231	101.057
1883	YGL210W	YPT32	+	101.845	113.104	82.0707	112.133	92.3656	98.6184
1884	YGL211W	NCS6	+	622.634	569.207	567.491	635.298	556.012	576.175
1885	YGL212W	VAM7	+	1266.28	1247.06	1188.38	1163.53	1183.57	1073.91
1886	YGL213C	SKI8	-	102.606	113.015	57.3947	36.0571	95.137	100.833
1887	YGL215W	CLG1	+	520.93	506.644	434.921	515.176	478.155	466.964
1888	YGL216W	KIP3	+	-33.4375	-30.2034	-91.6512	46.6444	-96.1311	-105.121
1889	YGL219C	MDM34	-	82.1791	13.1633	-86.8246	10.8033	50.5185	48.0185
1890	YGL220W	BOL2	+	178.349	178.856	169.338	176.379	180.567	180.348
1891	YGL221C	NIF3	-	114.471	154.222	94.7593	152.474	164.409	181.365
1892	YGL222C	EDC1	-	139.893	137.13	125.87	146.694	131.569	110.444
1893	YGL223C	COG1	-	118.162	127.4	107.286	104	60.92	3.43333
1894	YGL224C	SDT1	-	65.1958	65.6129	58.7651	80.1657	76.4653	74.8367
1895	YGL225W	VRG4	+	118.636	123.954	78.824	102.56	145.491	137.561
1896	YGL226C-A	OST5	-	159.436	158.315	155.335	165.521	170.624	163.17
1897	YGL226W	MTC3	+	74.9683	77.0364	61.5833	70.5	85.9615	79.6491
1898	YGL227W	VID30	+	-23.6	56.2414	-268.865	59.1957	-55.28	-133.769
1899	YGL228W	SHE10	+	114.545	144.771	8.5748	117.248	131.907	90.1485
1900	YGL229C	SAP4	-	358.556	-57.8	-283.455	214.556	-43.1538	-405.812
1901	YGL230C	NA	-	151.444	101.667	284.5	328.5	208.6	96
1902	YGL231C	EMC4	-	72.9649	77.0295	60.5381	61.4342	82.5812	95.5517
1903	YGL232W	TAN1	+	45.552	51.6752	27.7838	57.4545	41.336	33.7456
1904	YGL233W	SEC15	+	-29.4667	-48.8082	-352.162	-82.5443	-213.797	-313.292
1905	YGL234W	ADE57	+	52.0526	60.9815	-73.3317	44.0565	57.3998	41.4993
1906	YGL236C	MTO1	-	-20.0811	37.54	-147.486	-3.61905	-104.029	-60.7833
1907	YGL237C	HAP2	-	166.486	140.719	84.4074	137.034	165.961	141.667
1908	YGL238W	CSE1	+	-108.605	-170.671	-182.135	-87.1646	-192.969	-73.8414
1909	YGL240W	DOC1	+	2406.72	2463.36	1987.19	2460.51	2088.29	2467.38
1910	YGL241W	KAP114	+	59.5946	73.359	-294.451	-173.838	-309	-169.974
1911	YGL242C	ANK1	-	157.2	159.674	144.184	158.384	154.658	166.169
1912	YGL243W	TAD1	+	106.667	100.366	43.8718	110.939	58	68.3171
1913	YGL244W	RTF1	+	39.8583	93.2455	-24.2936	76.837	62.7521	97.0632
1914	YGL245W	GUS1	+	54.8852	37.9218	-142.171	32.4844	20.0094	21.1498
1915	YGL246C	RAI1	-	155.263	167.104	61.5138	123.339	120.382	103.822
1916	YGL247W	BRR6	+	83.0789	61.1579	113.606	122.2	121.077	100.35
1917	YGL248W	PDE1	+	256.283	251.7	116.576	156.69	106.145	148.015
1918	YGL250W	RMR1	+	448.167	215.667	171.733	222.895	226.333	290.474
1919	YGL251C	HFM1	-	-4.36364	219.586	-328.419	-49.0645	-92.4706	-346.769
1920	YGL252C	RTG2	-	66.5155	58.871	-16.7023	84.9286	76.5968	76.5488
1921	YGL253W	HXK2	+	170.008	167.714	96.5382	156.791	154.105	153.548
1922	YGL254W	FZF1	+	2194.72	2267.69	2088.64	2217.34	2201.58	2210.73
1923	YGL255W	ZRT1	+	106.668	158.787	51.3675	66.1007	100.529	97.7458
1924	YGL256W	ADH4	+	190.681	142.719	154.22	138.833	169.473	186.367
1925	YGL257C	MNT2	-	150.296	115.148	-78.28	54.8983	52.9538	42.8657
1926	YGL263W	COS12	+	225.875	115.4	55	94	-28.5	46
1927	YGR001C	EFM5	-	30.8808	22.0598	-12.006	39.8603	-16.4178	17.5
1928	YGR002C	SWC4	-	254.736	253.745	154.164	225.705	206.383	228.132
1929	YGR003W	CUL3	+	234.179	218.296	18.7111	170.229	42.86	200.844
1930	YGR004W	PEX31	+	226.826	227.627	173.231	179.159	102.465	223.5
1931	YGR005C	TFG2	-	102.813	89.8842	-36.8409	87.3684	51.3929	69.3902
1932	YGR006W	PRP18	+	1112.75	1012.74	1062.41	1143.95	1096.57	1041.3
1933	YGR007W	ECT1	+	114.627	117.221	32.9856	127.114	114.718	120.989
1934	YGR008C	STF2	-	203.439	156.915	143.31	151.713	154.519	147.275
1935	YGR009C	SEC9	-	81.3538	101.918	-26.0471	71.3562	68.9158	90.4384
1936	YGR010W	NMA2	+	182.024	173.139	76.6842	176.806	174.938	243.429
1937	YGR012W	MCY1	+	143.191	97.3768	20.2982	75.0169	177.904	28.6364
1938	YGR013W	SNU71	+	500.627	465.276	108.946	232.979	347.611	171.5
1939	YGR014W	MSB2	+	-8.72685	-6.87324	-225.429	-5.44162	2.45714	22.8698
1940	YGR015C	EAT1	-	218.556	223.708	168.969	137.087	118.714	197.429
1941	YGR016W	NA	+	1745.21	1759.67	1521.74	1669.33	1639.84	1506.84
1942	YGR017W	NA	+	112.104	120.272	72.5929	105.416	98.7857	101.808
1943	YGR019W	UGA1	+	89.5333	85.1571	3.71429	55.2262	87.3306	73.629
1944	YGR020C	VMA7	-	141.799	143.728	134.204	141.747	146.746	144.852
1945	YGR021W	DPC29	+	50.6667	91.4865	1.83871	66.2222	64.1231	77.3
1946	YGR023W	MTL1	+	200.735	171.457	107.709	147.791	190.822	139.887
1947	YGR024C	THG1	-	74.1846	73.9474	53.8451	74.5643	55.4514	75.6312
1948	YGR025W	NA	+	1043.53	1043.12	993.776	1043.38	1021.11	1009.97
1949	YGR026W	NA	+	159.076	174.178	155.832	170.057	169.91	146.953
1950	YGR027C	RPS25A	-	77.0732	80.4469	73.6469	76.0948	76.9783	74.7346
1951	YGR028W	MSP1	+	194.698	172.055	102.145	99.2857	153.507	152.643
1952	YGR029W	ERV1	+	136.604	136.419	101.5	134.667	120.186	142.87
1953	YGR030C	POP6	-	73.8537	77.6667	50.9857	71.9455	102.604	78.7419
1954	YGR031W	IMO32	+	1804.5	1653.82	897.144	1836.82	1495.07	2249.4
1955	YGR032W	GSC2	+	-419.855	-509.016	-826.132	-528.052	-626.153	-703.98
1956	YGR033C	TIM21	-	258.699	266.948	249.212	241.814	252.091	258.886
1957	YGR034W	RPL26B	+	106.446	109.309	98.402	111.361	107.778	107.583
1958	YGR035C	NA	-	162.808	143.697	159.854	150.419	132.912	155.242
1959	YGR036C	CAX4	-	384.091	396.239	344.422	413.396	285.882	303.246
1960	YGR037C	ACB1	-	200.616	203.752	199.616	209.208	197.692	197.999
1961	YGR038W	ORM1	+	120.245	110.805	105.145	143.784	85.4048	133.026
1962	YGR039W	NA	+	1089.32	1127.89	871.467	919.444	738.591	797.933
1963	YGR040W	KSS1	+	830.25	626.213	307.991	449.471	388.58	453.154
1964	YGR041W	BUD9	+	403.069	533.722	84	216.308	272	230.4
1965	YGR042W	MTE1	+	100.405	119.216	86.3962	93.7111	107.5	114.667
1966	YGR043C	NQM1	-	198.387	116.536	72.2222	132.708	114	152.365
1967	YGR044C	RME1	-	224.952	240.33	194.524	197.987	241.537	218.639
1968	YGR045C	NA	-	1143.59	1166.36	1068.79	1050.27	1127.79	1053.31
1969	YGR046W	TAM41	+	314.574	279.882	196.118	285.848	295.096	259.75
1970	YGR047C	TFC4	-	47	-34.5952	-381.19	-43.4318	-105.975	-223.647
1971	YGR048W	UFD1	+	74.7887	99.8983	-34.9663	25.253	61.6078	67.0563
1972	YGR049W	SCM4	+	185.132	187.488	150.8	198.179	180.542	172.739
1973	YGR050C	NA	-	128.762	160.2	170.944	141.95	179.8	217.286
1974	YGR052W	FMP48	+	178.2	174	98.8571	63	141.444	98.5
1975	YGR053C	MCO32	-	116.667	73.1429	0.6	59.25	89.5714	12.7273
1976	YGR054W	NA	+	154.781	122.181	14.1754	130.618	118.836	109.538
1977	YGR055W	MUP1	+	73.2913	99.4033	25.5525	78.6719	149.648	54.8105
1978	YGR056W	RSC1	+	76.0179	101.574	-269.048	73.2857	16.2969	34.4815
1979	YGR057C	LST7	-	321.188	325.024	233.892	330.564	258.327	322.282
1980	YGR058W	PEF1	+	304.2	392.682	387.65	317.206	268.486	301.351
1981	YGR060W	ERG25	+	256.054	262.334	205.07	247.571	253.837	261.38
1982	YGR061C	ADE6	-	-2.05349	14.9254	-300.839	-44.7634	-77.7795	7.10067
1983	YGR062C	COX18	-	3119.5	3463.33	2546.2	3158.08	2755.64	2756.48
1984	YGR063C	SPT4	-	266.665	254.791	207.203	237.455	243.653	239.521
1985	YGR065C	VHT1	-	-135.179	-69.7018	-131.167	-16.8793	-145.952	-59.2188
1986	YGR067C	NA	-	109.778	-258.727	-230.389	108.8	-196.167	-104.167
1987	YGR068C	ART5	-	329.604	315.286	284.444	391.729	371.083	252.238
1988	YGR070W	ROM1	+	-630.233	-682.4	-830.296	-698.029	-467.65	-1020
1989	YGR071C	ENV11	-	-191.933	-278.156	-234.977	-190.968	-510.438	-413.19
1990	YGR072W	UPF3	+	74.7759	75.9848	18	61.209	72.6711	25.8125
1991	YGR074W	SMD1	+	289.368	281.644	235.233	276.677	288.823	295.868
1992	YGR075C	PRP38	-	342.375	470.25	397.824	312.296	199.533	242.688
1993	YGR076C	MRPL25	-	112.612	119.488	80.9429	116.238	114.796	121.4
1994	YGR077C	PEX8	-	71.5143	-5.43243	-54.3019	63.7838	45.5135	161.528
1995	YGR078C	PAC10	-	165.839	89.0992	90.5289	143.882	126.773	149.1
1996	YGR079W	NA	+	111.153	132.782	24.0926	55.3846	122.038	102.649
1997	YGR080W	TWF1	+	84.6406	87.0896	51.4471	63.3462	72.3086	24.2879
1998	YGR081C	SLX9	-	128.206	146.906	87.5132	109.195	109.467	136.299
1999	YGR082W	TOM20	+	132.192	138.562	131.217	131.295	139.185	133.97
[truncated: 3,471 more rows]
