# Supplementary material
Source: HighWire-hosted journal article supplement (doi:10.1101/rna.080781.125)
Supplement: Supplemental_TableS3.xlsx [file Supplemental_TableS3.xlsx]

## Sheet: all_mutants_DE_20260311
gene_name	gene_id	seqnames.x	strand.x	baseMean_h7_vs_WT	log2FoldChange_h7_vs_WT	lfcSE_h7_vs_WT	stat_h7_vs_WT	pvalue_h7_vs_WT	padj_h7_vs_WT		baseMean_M_vs_WT	log2FoldChange_M_vs_WT	lfcSE_M_vs_WT	stat_M_vs_WT	pvalue_M_vs_WT	padj_M_vs_WT
MNN4	YKL201C	chrXI	-	119.88	2.6784	1.49184	1.79536	0.0725956	0.606306		119.88	0.0440919	1.49837	0.0294267	0.976524	0.999182
NA	YHR175W-A	chrVIII	+	273.103	2.372	0.374989	6.32553	2.52e-10	8.02e-08		273.103	1.09491	0.378712	2.89115	0.0038383	0.204172
CWC24	YLR323C	chrXII	-	143.721	1.94147	0.235152	8.25622	1.5e-16	1.43e-13		143.721	1.29876	0.240216	5.40664	6.42e-08	4.08e-05
NA	YBR099C	chrII	-	14.3669	1.90257	0.739152	2.57399	0.0100533	0.208388		14.3669	2.00742	0.735355	2.72986	0.00633603	0.266108
AGA1	YNR044W	chrXIV	+	202.57	1.88411	0.213522	8.82397	1.1e-18	2.11e-15		202.57	0.819368	0.220757	3.71163	0.00020593	0.027707
SPO19	YPL130W	chrXVI	+	16.3792	1.54063	0.667609	2.30768	0.0210171	0.32585		16.3792	1.68798	0.662719	2.54705	0.0108638	0.339627
CHA1	YCL064C	chrIII	-	387.949	1.48542	0.172671	8.60263	7.79e-18	1.11e-14		387.949	-0.116983	0.181117	-0.645896	0.518346	0.999182
HSP12	YFL014W	chrVI	+	792.828	1.40139	0.439847	3.18608	0.00144217	0.0585153		792.828	0.0062743	0.441227	0.0142201	0.988654	0.999182
RRN7	YJL025W	chrX	+	21.982	1.39901	0.552406	2.53258	0.0113228	0.221841		21.982	0.793072	0.566387	1.40023	0.161445	0.977274
HSP30	YCR021C	chrIII	-	29.7918	1.39741	0.451968	3.09185	0.00198916	0.0748684		29.7918	0.0461445	0.485074	0.0951286	0.924213	0.999182
NA	YMR141C	chrXIII	-	48.2935	1.38687	0.363146	3.81905	0.000133968	0.00923409		48.2935	0.38709	0.380542	1.01721	0.309054	0.999182
MRS2	YOR334W	chrXV	+	21.1314	1.37379	0.542048	2.53444	0.0112628	0.221613		21.1314	0.648417	0.560298	1.15727	0.247161	0.999182
PUL4	YNR063W	chrXIV	+	17.7011	1.36911	0.601807	2.275	0.0229061	0.343129		17.7011	0.401403	0.629393	0.637762	0.523628	0.999182
COX17	YLL009C	chrXII	-	117.068	1.35514	0.244049	5.55275	2.81e-08	5.36e-06		117.068	0.151735	0.257614	0.589003	0.555859	0.999182
USE1	YGL098W	chrVII	+	116.743	1.34585	0.236604	5.68821	1.28e-08	2.82e-06		116.743	-0.304396	0.258018	-1.17975	0.2381	0.999182
AGA2	YGL032C	chrVII	-	10.5487	1.33398	0.771885	1.72821	0.0839507	0.638731		10.5487	0.884547	0.7868	1.12423	0.260914	0.999182
ANB1	YJR047C	chrX	-	29.0381	1.32568	0.467211	2.83744	0.00454764	0.128797		29.0381	0.352999	0.489207	0.721573	0.470557	0.999182
NA	YIL025C	chrIX	-	43.0086	1.29652	0.406719	3.18775	0.00143385	0.0585153		43.0086	1.09909	0.409312	2.68521	0.0072484	0.28019
ECM13	YBL043W	chrII	+	54.5781	1.26252	0.33734	3.74257	0.000182148	0.0122597		54.5781	0.297885	0.353504	0.842663	0.399417	0.999182
NA	YHR071C-A	chrVIII	-	8.65262	1.25787	0.815518	1.54242	0.122971	0.750819		8.65262	0.00464731	0.87382	0.00531838	0.995757	0.999182
NA	YCR022C	chrIII	-	20.5157	1.23232	0.547709	2.24996	0.0244516	0.353252		20.5157	0.154303	0.57824	0.266849	0.789586	0.999182
IDH2	YOR136W	chrXV	+	530.679	1.20475	0.150717	7.99346	1.31e-15	9.38e-13		530.679	0.0166459	0.155643	0.106949	0.914829	0.999182
KAR4	YCL055W	chrIII	+	110.896	1.19859	0.258942	4.62879	3.68e-06	0.000438333		110.896	0.590377	0.265043	2.22748	0.0259155	0.522052
NA	YJL022W	chrX	+	34.2108	1.19147	0.437652	2.72242	0.00648061	0.164051		34.2108	1.04279	0.439756	2.37128	0.0177265	0.437127
TDH1	YJL052W	chrX	+	500.675	1.18675	0.147018	8.07213	6.91e-16	5.65e-13		500.675	-0.148879	0.153268	-0.971365	0.331366	0.999182
MUD1	YBR119W	chrII	+	81.8119	1.18181	0.305512	3.86831	0.000109594	0.00774059		81.8119	-0.0253945	0.321494	-0.078989	0.937041	0.999182
SNR53	YNCE0003W	chrV	+	18.6408	1.17366	0.588954	1.99278	0.0462854	0.490023		18.6408	0.941723	0.594108	1.5851	0.112943	0.892466
AAR2	YBL074C	chrII	-	13.2861	1.15162	0.687986	1.6739	0.0941507	0.667455		13.2861	0.621433	0.704471	0.882127	0.377708	0.999182
NA	YIL082W	chrIX	+	13.8567	1.14337	0.666288	1.71602	0.086158	0.645079		13.8567	0.00213273	0.706681	0.00301795	0.997592	0.99955
IDH1	YNL037C	chrXIV	-	385.089	1.13424	0.149544	7.58465	3.33e-14	1.91e-11		385.089	-0.0491752	0.156387	-0.314446	0.753182	0.999182
BSC5	YNR069C	chrXIV	-	14.5833	1.12958	0.651558	1.73366	0.082979	0.636839		14.5833	0.56427	0.668669	0.84387	0.398742	0.999182
GAS2	YLR343W	chrXII	+	27.6631	1.11553	0.478872	2.32949	0.0198334	0.311722		27.6631	0.466209	0.493281	0.945118	0.344598	0.999182
NA	YBR292C	chrII	-	22.0766	1.10515	0.541536	2.04077	0.0412741	0.46851		22.0766	0.864174	0.546552	1.58114	0.113847	0.893481
NFG1	YLR042C	chrXII	-	36.5077	1.09932	0.4445	2.47316	0.0133925	0.243233		36.5077	0.743508	0.450389	1.65081	0.0987769	0.863405
CTR3	YLR411W	chrXII	+	14.7213	1.09327	0.637412	1.71518	0.0863124	0.645079		14.7213	0.442072	0.657894	0.671949	0.501616	0.999182
MOH1	YBL049W	chrII	+	42.4536	1.08711	0.407341	2.6688	0.0076123	0.178221		42.4536	0.162411	0.424172	0.382889	0.701802	0.999182
NA	YDL109C	chrIV	-	11.7707	1.08551	0.717748	1.51238	0.130438	0.758899		11.7707	0.745541	0.728475	1.02343	0.306106	0.999182
FUS1	YCL027W	chrIII	+	28.9746	1.07888	0.459276	2.34908	0.0188198	0.29825		28.9746	0.385132	0.474837	0.811083	0.417318	0.999182
RRT5	YFR032C	chrVI	-	14.3518	1.07603	0.685721	1.56919	0.116603	0.729853		14.3518	1.45917	0.672912	2.16844	0.0301252	0.558687
RRT1	YBL048W	chrII	+	37.8934	1.06166	0.418722	2.53547	0.0112296	0.221613		37.8934	0.154295	0.436701	0.353321	0.723848	0.999182
SAG1	YJR004C	chrX	-	281.188	1.03998	0.312427	3.32873	0.000872442	0.040252		281.188	0.735391	0.313338	2.34696	0.0189275	0.441975
NA	YLR302C	chrXII	-	14.0507	1.02873	0.744054	1.3826	0.166787	0.835705		14.0507	1.82693	0.719616	2.53876	0.0111246	0.342171
NA	YGR035W-A	chrVII	+	29.2514	1.02668	0.450683	2.27804	0.0227239	0.343017		29.2514	-0.228299	0.483163	-0.472509	0.636563	0.999182
SNO1	YMR095C	chrXIII	-	99.4708	1.01516	0.293313	3.46101	0.000538146	0.0287732		99.4708	-0.342792	0.30982	-1.10642	0.268543	0.999182
ATG10	YLL042C	chrXII	-	23.7106	1.00932	0.514225	1.96281	0.0496685	0.505611		23.7106	0.722932	0.52036	1.38929	0.164743	0.979481
DPC29	YGR021W	chrVII	+	41.0139	1.00314	0.383398	2.61645	0.00888503	0.194013		41.0139	0.315504	0.396576	0.795571	0.426282	0.999182
MRX15	YNR040W	chrXIV	+	30.4998	1.00187	0.440118	2.27637	0.0228239	0.343129		30.4998	0.0711337	0.462206	0.153901	0.877688	0.999182
NA	YNL143C	chrXIV	-	15.1353	0.997139	0.651524	1.53047	0.1259	0.752311		15.1353	0.685483	0.659962	1.03867	0.298958	0.999182
HSP26	YBR072W	chrII	+	229.796	0.973382	0.361699	2.69114	0.00712078	0.173353		229.796	-0.0894732	0.366008	-0.244457	0.806877	0.999182
YPT53	YNL093W	chrXIV	+	9.33404	0.969097	0.807256	1.20048	0.229952	0.905636		9.33404	-0.192797	0.8591	-0.224417	0.822433	0.999182
FIG2	YCR089W	chrIII	+	54.8895	0.968273	0.348988	2.77452	0.00552834	0.144947		54.8895	0.526245	0.355539	1.48013	0.138838	0.948449
AQY2	YLL052C	chrXII	-	22.337	0.962291	0.553001	1.74012	0.0818373	0.631837		22.337	0.550311	0.562364	0.978566	0.327794	0.999182
GUF1	YLR289W	chrXII	+	19.6815	0.954785	0.56885	1.67845	0.0932597	0.664542		19.6815	0.771669	0.572698	1.34743	0.177843	0.994245
SPO77	YLR341W	chrXII	+	10.1542	0.953786	0.755196	1.26297	0.206601	0.89205		10.1542	-0.0835372	0.799652	-0.104467	0.916799	0.999182
GRE2	YOL151W	chrXV	+	36.6701	0.952543	0.430861	2.21079	0.0270505	0.371118		36.6701	0.634793	0.436271	1.45504	0.145657	0.959851
MRPL19	YNL185C	chrXIV	-	77.5671	0.945508	0.285009	3.31746	0.000908385	0.0409662		77.5671	0.292841	0.293926	0.996309	0.3191	0.999182
DIA4	YHR011W	chrVIII	+	21.47	0.94443	0.531602	1.77657	0.0756387	0.622632		21.47	0.673633	0.537797	1.25258	0.210359	0.999182
ACO1	YLR304C	chrXII	-	406.087	0.944123	0.301464	3.1318	0.00173741	0.0673847		406.087	-0.123662	0.304426	-0.406214	0.684585	0.999182
NA	YNR068C	chrXIV	-	19.0341	0.942718	0.559519	1.68487	0.0920133	0.662148		19.0341	0.462645	0.572519	0.808087	0.419041	0.999182
SNU66	YOR308C	chrXV	-	30.8081	0.939206	0.447552	2.09854	0.0358574	0.435541		30.8081	0.128826	0.465983	0.27646	0.782195	0.999182
NA	YGR240C-A	chrVII	-	15.3455	0.934773	0.710616	1.31544	0.188362	0.869928		15.3455	0.608266	0.718733	0.846303	0.397384	0.999182
YAT1	YAR035W	chrI	+	41.4467	0.93305	0.414204	2.25263	0.0242822	0.352881		41.4467	0.387723	0.42357	0.91537	0.359997	0.999182
NA	YJR149W	chrX	+	87.0972	0.932757	0.273488	3.4106	0.000648204	0.0328175		87.0972	0.191575	0.283117	0.676662	0.49862	0.999182
MAK32	YCR019W	chrIII	+	30.5252	0.929087	0.450036	2.06447	0.0389727	0.454669		30.5252	0.613499	0.456224	1.34473	0.178711	0.994245
NA	YNL184C	chrXIV	-	64.2217	0.923059	0.313652	2.94294	0.00325108	0.104742		64.2217	0.294217	0.32306	0.910719	0.362443	0.999182
NA	YML131W	chrXIII	+	41.5342	0.914776	0.383793	2.38351	0.0171482	0.284363		41.5342	0.262056	0.396227	0.661377	0.50837	0.999182
MRPL44	YMR225C	chrXIII	-	92.7933	0.913076	0.263154	3.46974	0.000520958	0.028117		92.7933	0.459802	0.268482	1.7126	0.0867859	0.833898
MST1	YKL194C	chrXI	-	32.3843	0.907715	0.436157	2.08116	0.037419	0.443801		32.3843	0.404359	0.446555	0.905507	0.365197	0.999182
CYT2	YKL087C	chrXI	-	72.6698	0.905368	0.305573	2.96285	0.00304803	0.101382		72.6698	0.250266	0.314569	0.795583	0.426275	0.999182
LIN1	YHR156C	chrVIII	-	31.4578	0.895852	0.435666	2.05628	0.0397555	0.458836		31.4578	0.390008	0.446468	0.873541	0.382368	0.999182
PET100	YDR079W	chrIV	+	127.187	0.888297	0.244015	3.64033	0.000272285	0.016932		127.187	0.396181	0.248646	1.59335	0.111081	0.886324
GSP2	YOR185C	chrXV	-	99.9841	0.884208	0.260905	3.389	0.000701478	0.034897		99.9841	0.132474	0.269911	0.490807	0.623563	0.999182
RIF2	YLR453C	chrXII	-	72.8234	0.880191	0.302931	2.90559	0.00366565	0.111305		72.8234	0.440823	0.30865	1.42823	0.153227	0.970951
CSA1	YPR174C	chrXVI	-	33.752	0.876169	0.441852	1.98294	0.0473736	0.4948		33.752	0.264702	0.454254	0.582718	0.560083	0.999182
SHY1	YGR112W	chrVII	+	23.0164	0.875552	0.510577	1.71483	0.0863765	0.645079		23.0164	-0.0772675	0.53713	-0.143852	0.885617	0.999182
ARN1	YHL040C	chrVIII	-	71.6441	0.872119	0.346339	2.51811	0.0117988	0.227148		71.6441	0.643677	0.348667	1.84611	0.0648765	0.753061
POL12	YBL035C	chrII	-	52.2983	0.869867	0.404197	2.15209	0.0313904	0.407307		52.2983	1.08879	0.400411	2.71918	0.00654448	0.26936
SFL1	YOR140W	chrXV	+	34.9847	0.867241	0.414992	2.08978	0.0366376	0.440075		34.9847	0.443188	0.423354	1.04685	0.295169	0.999182
BFA1	YJR053W	chrX	+	8.75988	0.861132	0.807356	1.06661	0.286149	0.956539		8.75988	0.00485067	0.846115	0.00573288	0.995426	0.999182
MBR1	YKL093W	chrXI	+	12.7777	0.85773	0.68525	1.2517	0.210678	0.896196		12.7777	0.152228	0.710224	0.214338	0.830283	0.999182
SNR58	YNCO0003C	chrXV	-	13.3597	0.855326	0.716255	1.19417	0.232413	0.907602		13.3597	0.799834	0.716671	1.11604	0.264405	0.999182
NA	YGR064W	chrVII	+	15.2691	0.853983	0.631777	1.35172	0.176466	0.850514		15.2691	0.700206	0.635368	1.10205	0.27044	0.999182
MNP1	YGL068W	chrVII	+	148.175	0.852405	0.22183	3.8426	0.000121739	0.00849355		148.175	0.078247	0.229286	0.341264	0.732905	0.999182
CWC2	YDL209C	chrIV	-	35.1776	0.851615	0.409307	2.08062	0.0374683	0.443801		35.1776	0.132629	0.424871	0.312162	0.754917	0.999182
HSP10	YOR020C	chrXV	-	786.312	0.843761	0.147784	5.70943	1.13e-08	2.59e-06		786.312	-0.140485	0.150638	-0.932601	0.351026	0.999182
CIN2	YPL241C	chrXVI	-	172.956	0.842692	0.241122	3.49488	0.000474267	0.0268642		172.956	-0.112233	0.248744	-0.4512	0.651846	0.999182
MRPL7	YDR237W	chrIV	+	58.4362	0.838661	0.347337	2.41455	0.0157548	0.273153		58.4362	0.340143	0.35457	0.959309	0.337403	0.999182
MSY1	YPL097W	chrXVI	+	32.8065	0.831926	0.425546	1.95496	0.0505879	0.506239		32.8065	0.295724	0.43701	0.676698	0.498598	0.999182
MAM33	YIL070C	chrIX	-	122.178	0.822935	0.235907	3.48838	0.000485956	0.0272564		122.178	0.204651	0.242471	0.844023	0.398657	0.999182
PMT6	YGR199W	chrVII	+	43.2998	0.819009	0.386775	2.11753	0.0342147	0.425591		43.2998	0.503819	0.391945	1.28543	0.198641	0.999182
EHD3	YDR036C	chrIV	-	53.3878	0.818057	0.343654	2.38046	0.0172908	0.285074		53.3878	0.60357	0.346601	1.7414	0.0816142	0.82693
NA	YLL053C	chrXII	-	25.1377	0.816564	0.52738	1.54834	0.121541	0.747672		25.1377	0.596434	0.531591	1.12198	0.261871	0.999182
ITR2	YOL103W	chrXV	+	130.713	0.815138	0.227648	3.58069	0.000342684	0.0208563		130.713	0.501335	0.230541	2.17461	0.0296596	0.558166
NA	YER121W	chrV	+	75.2383	0.814797	0.286275	2.84621	0.00442433	0.126258		75.2383	-0.0401388	0.299136	-0.134183	0.893258	0.999182
NQM1	YGR043C	chrVII	-	34.5256	0.814778	0.426403	1.91082	0.0560282	0.527159		34.5256	0.183246	0.439606	0.41684	0.676795	0.999182
NA	YLR123C	chrXII	-	16.1905	0.812397	0.608958	1.33408	0.182179	0.862519		16.1905	0.271106	0.625386	0.433503	0.66465	0.999182
KCC4	YCL024W	chrIII	+	25.0923	0.811408	0.499142	1.6256	0.104034	0.699366		25.0923	0.918737	0.495456	1.85432	0.0636928	0.745166
HSP60	YLR259C	chrXII	-	897.061	0.805676	0.139045	5.79435	6.86e-09	1.63e-06		897.061	-0.357222	0.142356	-2.50935	0.0120952	0.356068
NA	YGL052W	chrVII	+	11.066	0.804299	0.729032	1.10324	0.269922	0.941683		11.066	0.315367	0.746905	0.422232	0.672856	0.999182
YRO2	YBR054W	chrII	+	234.88	0.803094	0.188879	4.2519	2.12e-05	0.00198791		234.88	-0.28032	0.197293	-1.42083	0.155366	0.971508
GEP3	YOR205C	chrXV	-	39.4696	0.802847	0.394577	2.0347	0.0418808	0.470768		39.4696	0.56777	0.398483	1.42483	0.154207	0.970951
HXT9	YJL219W	chrX	+	7.21156	0.801541	0.920507	0.870761	0.383885	0.979867		7.21156	0.356889	0.939945	0.379691	0.704175	0.999182
MRPL13	YKR006C	chrXI	-	92.0774	0.800764	0.263376	3.04039	0.00236275	0.0834403		92.0774	0.211965	0.270772	0.782817	0.433734	0.999182
GTT1	YIR038C	chrIX	-	126.413	0.799273	0.236061	3.38587	0.00070952	0.0349928		126.413	0.0273921	0.244323	0.112114	0.910733	0.999182
SNR82	YNCG0010W	chrVII	+	92.6348	0.799101	0.270508	2.95407	0.00313608	0.102526		92.6348	-0.351372	0.286526	-1.22632	0.220079	0.999182
MDM36	YPR083W	chrXVI	+	20.2109	0.798337	0.557334	1.43242	0.152023	0.804708		20.2109	0.612013	0.561347	1.09026	0.275599	0.999182
FMC1	YIL098C	chrIX	-	48.3384	0.79805	0.358048	2.22889	0.0258211	0.362955		48.3384	0.323487	0.366131	0.883526	0.376952	0.999182
NA	YGR146C-A	chrVII	-	26.3311	0.798026	0.49026	1.62776	0.103575	0.698513		26.3311	0.677279	0.492157	1.37614	0.168777	0.984274
NA	YLR311C	chrXII	-	38.5028	0.791722	0.400621	1.97624	0.048128	0.497005		38.5028	0.253371	0.411122	0.616292	0.537702	0.999182
ECM2	YBR065C	chrII	-	37.4185	0.787806	0.403117	1.95428	0.0506676	0.506239		37.4185	0.124781	0.416767	0.299402	0.764633	0.999182
MUS81	YDR386W	chrIV	+	26.5725	0.787722	0.501159	1.5718	0.115997	0.728296		26.5725	0.920987	0.497069	1.85284	0.0639057	0.746131
RFA1	YAR007C	chrI	-	74.0369	0.785624	0.298755	2.62966	0.00854708	0.189527		74.0369	0.915948	0.296338	3.09089	0.00199559	0.13231
SSY5	YJL156C	chrX	-	48.1335	0.783871	0.364252	2.152	0.031397	0.407307		48.1335	0.370912	0.371069	0.999579	0.317514	0.999182
FRE5	YOR384W	chrXV	+	26.262	0.781314	0.575396	1.35787	0.174504	0.845726		26.262	0.593177	0.57842	1.02551	0.305121	0.999182
ZRT1	YGL255W	chrVII	+	175.923	0.779062	0.50575	1.54041	0.12346	0.751546		175.923	0.00957534	0.508554	0.0188286	0.984978	0.999182
GTT2	YLL060C	chrXII	-	34.8068	0.777992	0.430171	1.80856	0.0705186	0.594063		34.8068	-0.143017	0.450501	-0.317461	0.750894	0.999182
NA	YNL146W	chrXIV	+	31.5178	0.77779	0.440872	1.76421	0.0776966	0.624828		31.5178	0.645277	0.44291	1.4569	0.145143	0.959851
MRPL17	YNL252C	chrXIV	-	69.4762	0.770023	0.30386	2.53414	0.0112724	0.221613		69.4762	0.106897	0.313676	0.340789	0.733262	0.999182
SST2	YLR452C	chrXII	-	101.26	0.766993	0.26406	2.90461	0.00367709	0.111305		101.26	0.414232	0.267787	1.54687	0.121894	0.910059
MDM35	YKL053C-A	chrXI	-	143.143	0.76402	0.219789	3.47615	0.000508671	0.0277153		143.143	0.164036	0.225658	0.726923	0.467273	0.999182
SGA1	YIL099W	chrIX	+	9.07119	0.763963	0.827254	0.923493	0.35575	0.977915		9.07119	0.946095	0.818005	1.15659	0.247441	0.999182
AIM33	YML087C	chrXIII	-	15.221	0.763789	0.631524	1.20944	0.226495	0.905141		15.221	0.232797	0.648207	0.35914	0.71949	0.999182
SNR161	YNCB0009C	chrII	-	9.36638	0.763731	0.803713	0.950254	0.341983	0.975636		9.36638	0.1941	0.826694	0.234791	0.814371	0.999182
VPS69	YPR087W	chrXVI	+	73.5644	0.763504	0.296852	2.572	0.0101113	0.208833		73.5644	0.224863	0.304312	0.738924	0.459953	0.999182
MRP35	YNL122C	chrXIV	-	75.2844	0.762049	0.295713	2.57699	0.00996661	0.208267		75.2844	0.129848	0.304523	0.426397	0.669818	0.999182
COS5	YJR161C	chrX	-	70.0358	0.761459	0.323374	2.35473	0.0185359	0.297877		70.0358	0.326398	0.328997	0.9921	0.321149	0.999182
GEP7	YGL057C	chrVII	-	27.2677	0.75672	0.49428	1.53095	0.125781	0.752311		27.2677	0.86654	0.490771	1.76567	0.0774511	0.813023
TGL2	YDR058C	chrIV	-	24.8879	0.752804	0.490674	1.53422	0.124974	0.752311		24.8879	-0.0968608	0.513445	-0.188649	0.850368	0.999182
MRPL50	YNR022C	chrXIV	-	83.439	0.75156	0.278716	2.69651	0.00700701	0.172789		83.439	0.401103	0.282979	1.41743	0.156356	0.971508
OMS1	YDR316W	chrIV	+	50.4169	0.749038	0.355294	2.10822	0.0350121	0.428577		50.4169	0.504333	0.358889	1.40526	0.159943	0.977274
MTF1	YMR228W	chrXIII	+	36.117	0.748847	0.423353	1.76885	0.076919	0.624828		36.117	0.332695	0.431288	0.771399	0.44047	0.999182
NA	YAL037W	chrI	+	55.5555	0.741981	0.372148	1.99378	0.0461761	0.490023		55.5555	0.433709	0.376281	1.15262	0.249066	0.999182
YNG2	YHR090C	chrVIII	-	65.7526	0.741567	0.311517	2.3805	0.017289	0.285074		65.7526	0.558175	0.313698	1.77934	0.0751845	0.806691
AAD3	YCR107W	chrIII	+	29.2367	0.739917	0.472633	1.56552	0.117461	0.732818		29.2367	0.55464	0.475914	1.16542	0.243848	0.999182
MRPL38	YKL170W	chrXI	+	92.1494	0.739763	0.277281	2.66792	0.00763226	0.178221		92.1494	0.144737	0.284464	0.508806	0.610889	0.999182
RRF1	YHR038W	chrVIII	+	46.9531	0.735491	0.354337	2.07568	0.0379236	0.448266		46.9531	-0.0477479	0.369528	-0.129213	0.897189	0.999182
MRPL40	YPL173W	chrXVI	+	69.9708	0.73482	0.306163	2.4001	0.0163908	0.276613		69.9708	0.292497	0.312239	0.936771	0.348876	0.999182
RTG1	YOL067C	chrXV	-	70.9297	0.734737	0.300022	2.44895	0.0143275	0.255351		70.9297	0.298942	0.306045	0.97679	0.328673	0.999182
HST1	YOL068C	chrXV	-	90.3447	0.729518	0.269173	2.71022	0.00672385	0.168716		90.3447	0.31784	0.274113	1.15952	0.246243	0.999182
DIP5	YPL265W	chrXVI	+	125.688	0.728908	0.231958	3.14241	0.00167563	0.067037		125.688	-0.203424	0.242691	-0.838202	0.401917	0.999182
DPI8	YJL133C-A	chrX	-	241.815	0.727607	0.192791	3.77407	0.000160605	0.0109383		241.815	0.185885	0.196341	0.946746	0.343768	0.999182
COX14	YML129C	chrXIII	-	141.988	0.727553	0.23581	3.08534	0.00203321	0.0756844		141.988	-0.0133409	0.242933	-0.0549159	0.956205	0.999182
NA	YBL111C	chrII	-	15.1832	0.727337	0.65811	1.10519	0.269076	0.941683		15.1832	0.965816	0.649342	1.48738	0.136915	0.946007
MRX14	YDR115W	chrIV	+	109.551	0.727304	0.273386	2.66036	0.00780576	0.180568		109.551	0.31348	0.277424	1.12997	0.258489	0.999182
NA	YEL028W	chrV	+	31.0212	0.724513	0.451469	1.60479	0.108539	0.708306		31.0212	0.201071	0.462787	0.434479	0.663941	0.999182
NA	YLR402W	chrXII	+	45.8186	0.721622	0.386063	1.86918	0.0615973	0.554958		45.8186	0.773369	0.384389	2.01194	0.0442261	0.653771
ATG11	YPR049C	chrXVI	-	36.9651	0.721354	0.410441	1.75751	0.078831	0.624828		36.9651	0.466245	0.414929	1.12367	0.261151	0.999182
MGR1	YCL044C	chrIII	-	63.5274	0.721247	0.314054	2.29657	0.0216434	0.333752		63.5274	0.479244	0.317256	1.51059	0.130893	0.939303
PEX34	YCL056C	chrIII	-	60.0669	0.718779	0.324154	2.2174	0.0265957	0.367789		60.0669	0.323573	0.33005	0.980375	0.326901	0.999182
NA	YMR046W-A	chrXIII	+	20.7765	0.717864	0.544717	1.31787	0.187548	0.869928		20.7765	0.651599	0.545386	1.19475	0.232185	0.999182
BCS1	YDR375C	chrIV	-	44.808	0.716898	0.376513	1.90404	0.0569046	0.532817		44.808	0.456417	0.380657	1.19902	0.230519	0.999182
OPI3	YJR073C	chrX	-	162.364	0.715039	0.213078	3.35577	0.000791453	0.0377325		162.364	0.124825	0.218365	0.571637	0.567568	0.999182
SPO22	YIL073C	chrIX	-	9.29773	0.711736	0.76865	0.925956	0.354469	0.977915		9.29773	-0.491814	0.828675	-0.593494	0.55285	0.999182
CMC1	YKL137W	chrXI	+	91.4917	0.711055	0.269052	2.64282	0.0082219	0.185539		91.4917	0.0153821	0.278043	0.0553229	0.955881	0.999182
NA	YBL112C	chrII	-	15.4936	0.710896	0.649642	1.09429	0.273828	0.943093		15.4936	0.711441	0.648295	1.0974	0.272465	0.999182
COA3	YJL062W-A	chrX	+	142.957	0.709646	0.225023	3.15366	0.00161238	0.0649608		142.957	0.0763033	0.2312	0.330032	0.741376	0.999182
GPG1	YGL121C	chrVII	-	56.0816	0.708134	0.332675	2.1286	0.033287	0.419461		56.0816	0.0254958	0.34427	0.0740577	0.940965	0.999182
INO4	YOL108C	chrXV	-	73.8672	0.708104	0.295909	2.39298	0.0167122	0.278844		73.8672	0.434989	0.299306	1.45332	0.146134	0.959851
RCF3	YBR255C-A	chrII	-	62.0634	0.707483	0.343493	2.05967	0.03943	0.456637		62.0634	0.769331	0.341951	2.24983	0.0244598	0.509805
MSS116	YDR194C	chrIV	-	172.942	0.703768	0.202338	3.47818	0.000504828	0.0277153		172.942	0.256841	0.206132	1.246	0.212763	0.999182
TSR3	YOR006C	chrXV	-	124.177	0.701097	0.23829	2.9422	0.00325888	0.104742		124.177	0.345495	0.241725	1.42929	0.152921	0.970951
ZPS1	YOL154W	chrXV	+	32.927	0.69928	0.442797	1.57923	0.114282	0.720455		32.927	0.655781	0.44282	1.48092	0.138628	0.948449
IRC6	YFR043C	chrVI	-	75.3605	0.698555	0.284057	2.45921	0.0139244	0.250508		75.3605	-0.447495	0.303007	-1.47685	0.139716	0.948449
PRX1	YBL064C	chrII	-	149.465	0.697439	0.210158	3.31863	0.000904591	0.0409662		149.465	-0.109916	0.218584	-0.502854	0.615067	0.999182
COX23	YHR116W	chrVIII	+	40.5721	0.697112	0.411479	1.69416	0.0902343	0.655688		40.5721	0.113796	0.422311	0.26946	0.787575	0.999182
CIT3	YPR001W	chrXVI	+	12.4	0.695924	0.696777	0.998776	0.317903	0.972219		12.4	0.462678	0.70386	0.657344	0.51096	0.999182
MRPL27	YBR282W	chrII	+	93.3786	0.695495	0.260453	2.67033	0.00757765	0.178221		93.3786	0.237251	0.266074	0.891672	0.372569	0.999182
MAK16	YAL025C	chrI	-	142.607	0.693869	0.23546	2.94686	0.00321014	0.104348		142.607	0.619914	0.235753	2.6295	0.00855097	0.309137
NA	YMR085W	chrXIII	+	13.5942	0.693095	0.660409	1.04949	0.293951	0.960253		13.5942	0.01321	0.684436	0.0193006	0.984601	0.999182
MRPL33	YMR286W	chrXIII	+	118.848	0.692169	0.242186	2.85801	0.00426307	0.12382		118.848	0.338399	0.245705	1.37725	0.168433	0.98418
NA	YGL165C	chrVII	-	37.843	0.688907	0.412822	1.66878	0.0951619	0.668822		37.843	0.136216	0.423717	0.321478	0.747848	0.999182
SGF11	YPL047W	chrXVI	+	79.0144	0.688123	0.285696	2.40858	0.0160145	0.27349		79.0144	0.453456	0.288435	1.57212	0.115922	0.893647
EMP46	YLR080W	chrXII	+	10.2265	0.687213	0.757116	0.907672	0.364052	0.977915		10.2265	0.0865598	0.781231	0.110799	0.911776	0.999182
RSM27	YGR215W	chrVII	+	81.1034	0.687185	0.284564	2.41487	0.0157407	0.273153		81.1034	0.181244	0.291226	0.622349	0.533712	0.999182
DAL4	YIR028W	chrIX	+	12.4274	0.684542	0.711172	0.962555	0.335771	0.973123		12.4274	1.09496	0.695143	1.57516	0.11522	0.893647
RIM13	YMR154C	chrXIII	-	18.8761	0.684438	0.549402	1.24579	0.212842	0.896665		18.8761	-0.177316	0.577007	-0.307303	0.758613	0.999182
HEF3	YNL014W	chrXIV	+	13.822	0.684355	0.693975	0.986138	0.324065	0.972559		13.822	0.138881	0.711403	0.195221	0.84522	0.999182
NA	YPL264C	chrXVI	-	39.6144	0.682616	0.389576	1.7522	0.0797389	0.62577		39.6144	0.295459	0.396881	0.744453	0.456603	0.999182
MHR1	YDR296W	chrIV	+	87.4508	0.675988	0.27297	2.47642	0.0132706	0.241788		87.4508	0.241667	0.278376	0.868132	0.385322	0.999182
MSI1	YBR195C	chrII	-	28.0783	0.674844	0.481725	1.40089	0.161247	0.82735		28.0783	0.379204	0.487783	0.777403	0.436921	0.999182
CUS2	YNL286W	chrXIV	+	41.3224	0.673773	0.384237	1.75354	0.0795097	0.624828		41.3224	0.360949	0.389773	0.926049	0.354421	0.999182
NA	YLR122C	chrXII	-	14.3645	0.67316	0.652569	1.03155	0.302281	0.965936		14.3645	0.290292	0.664431	0.436902	0.662182	0.999182
MSC1	YML128C	chrXIII	-	47.0789	0.670962	0.380762	1.76216	0.0780427	0.624828		47.0789	-0.175143	0.396423	-0.44181	0.658627	0.999182
CIT1	YNR001C	chrXIV	-	261.105	0.669863	0.171281	3.91091	9.19e-05	0.00688188		261.105	-0.477637	0.18048	-2.64648	0.00813339	0.30215
SPH1	YLR313C	chrXII	-	34.7864	0.669689	0.418844	1.5989	0.109843	0.71007		34.7864	0.509988	0.421424	1.21015	0.22622	0.999182
MTO1	YGL236C	chrVII	-	52.9304	0.668441	0.346544	1.92887	0.0537464	0.52293		52.9304	0.163311	0.354933	0.460119	0.645431	0.999182
BOP3	YNL042W	chrXIV	+	58.1535	0.66728	0.323421	2.0632	0.039094	0.454669		58.1535	0.246448	0.33004	0.746722	0.455231	0.999182
NA	YPL038W-A	chrXVI	+	28.9744	0.666968	0.457201	1.45881	0.144619	0.794015		28.9744	0.344997	0.464063	0.743428	0.457222	0.999182
GDB1	YPR184W	chrXVI	+	45.7282	0.665501	0.363214	1.83225	0.0669138	0.57574		45.7282	-0.778686	0.396591	-1.96345	0.0495938	0.678626
TTI2	YJR136C	chrX	-	24.9697	0.655114	0.508118	1.28929	0.197296	0.879757		24.9697	0.834794	0.502595	1.66097	0.0967201	0.863405
NA	YOL099C	chrXV	-	34.6597	0.654387	0.429231	1.52455	0.12737	0.752311		34.6597	0.595189	0.429591	1.38548	0.165906	0.979795
ATG39	YLR312C	chrXII	-	20.3678	0.652347	0.527217	1.23734	0.215961	0.899896		20.3678	-0.342499	0.559138	-0.612549	0.540175	0.999182
NA	YER053C-A	chrV	-	74.2277	0.652301	0.321817	2.02693	0.0426694	0.474003		74.2277	-0.55964	0.340378	-1.64417	0.10014	0.863946
CIT2	YCR005C	chrIII	-	140.953	0.650642	0.248641	2.61679	0.00887602	0.194013		140.953	0.00339525	0.254535	0.013339	0.989357	0.999182
APE1	YKL103C	chrXI	-	28.3926	0.650641	0.454035	1.43302	0.151852	0.804708		28.3926	-0.366603	0.481353	-0.761609	0.446293	0.999182
NA	YNL134C	chrXIV	-	111.711	0.649565	0.24397	2.66248	0.00775683	0.180394		111.711	-0.0327919	0.252005	-0.130124	0.896469	0.999182
NA	YCR006C	chrIII	-	83.8322	0.649426	0.287915	2.25561	0.0240949	0.352549		83.8322	0.128856	0.294542	0.437481	0.661763	0.999182
NA	YJL175W	chrX	+	281.132	0.647378	0.165869	3.90294	9.5e-05	0.00688188		281.132	0.464136	0.16684	2.78193	0.00540374	0.247592
NA	YNL162W-A	chrXIV	+	28.1959	0.644404	0.468054	1.37677	0.168583	0.837552		28.1959	0.433107	0.472199	0.917213	0.359031	0.999182
PXA2	YKL188C	chrXI	-	18.4442	0.644395	0.574187	1.12227	0.261746	0.939205		18.4442	-0.0335427	0.594646	-0.0564078	0.955017	0.999182
THI11	YJR156C	chrX	-	21.9819	0.643439	0.512747	1.25489	0.20952	0.896196		21.9819	0.0818836	0.528239	0.155012	0.876812	0.999182
HST4	YDR191W	chrIV	+	21.579	0.642888	0.531882	1.2087	0.226776	0.905141		21.579	0.117608	0.545962	0.215414	0.829444	0.999182
SNP1	YIL061C	chrIX	-	33.2513	0.64267	0.435426	1.47596	0.139955	0.787673		33.2513	-0.0971786	0.452068	-0.214964	0.829795	0.999182
AGX1	YFL030W	chrVI	+	16.975	0.640823	0.606992	1.05574	0.291089	0.95763		16.975	0.513601	0.609632	0.842477	0.399521	0.999182
NA	YPR145C-A	chrXVI	-	27.8837	0.640549	0.468029	1.36861	0.171121	0.841776		27.8837	0.29891	0.475541	0.628568	0.529632	0.999182
YLF2	YHL014C	chrVIII	-	31.6734	0.640351	0.455587	1.40555	0.159857	0.821692		31.6734	0.457609	0.458733	0.997551	0.318497	0.999182
NA	YPL039W	chrXVI	+	27.9883	0.636708	0.464481	1.37079	0.170439	0.841776		27.9883	0.32574	0.471228	0.691258	0.489403	0.999182
NA	YKR041W	chrXI	+	1607.28	0.634216	0.124261	5.1039	3.33e-07	5.14e-05		1607.28	0.399845	0.124571	3.20978	0.00132837	0.105032
NA	YCL048W-A	chrIII	+	17.4221	0.631653	0.594876	1.06182	0.288316	0.956539		17.4221	0.461292	0.598876	0.770263	0.441144	0.999182
NA	YPR012W	chrXVI	+	8.47645	0.630585	0.798657	0.789557	0.429787	0.984362		8.47645	-0.530823	0.8602	-0.617093	0.537174	0.999182
MRPL31	YKL138C	chrXI	-	91.6114	0.62948	0.266112	2.36547	0.0180071	0.293267		91.6114	0.561279	0.266451	2.1065	0.0351606	0.585257
POL3	YDL102W	chrIV	+	64.5462	0.627596	0.315126	1.99157	0.0464179	0.490023		64.5462	0.796357	0.311838	2.55375	0.0106569	0.334988
RSM10	YDR041W	chrIV	+	84.3548	0.626629	0.274686	2.28126	0.0225333	0.342506		84.3548	0.274433	0.279086	0.983329	0.325446	0.999182
MSK1	YNL073W	chrXIV	+	57.8847	0.626426	0.330136	1.89748	0.0577651	0.535615		57.8847	0.379428	0.333619	1.13731	0.255408	0.999182
ASF1	YJL115W	chrX	+	70.5711	0.624145	0.314539	1.98432	0.0472204	0.494776		70.5711	0.332525	0.318209	1.04499	0.296028	0.999182
CNM1	YBR063C	chrII	-	45.8574	0.622321	0.363668	1.71123	0.0870384	0.645079		45.8574	0.203913	0.371136	0.549428	0.582712	0.999182
THI7	YLR237W	chrXII	+	106.205	0.621846	0.255183	2.43686	0.0148152	0.262408		106.205	0.170328	0.260214	0.654567	0.512747	0.999182
ECM4	YKR076W	chrXI	+	53.3077	0.620732	0.338687	1.83276	0.0668381	0.57574		53.3077	0.117976	0.347231	0.339764	0.734035	0.999182
MRPL9	YGR220C	chrVII	-	104.849	0.620543	0.250144	2.48075	0.0131108	0.240406		104.849	0.0652987	0.256744	0.254334	0.799238	0.999182
HNT3	YOR258W	chrXV	+	23.9997	0.620044	0.501547	1.23626	0.216361	0.899896		23.9997	0.274164	0.509852	0.537732	0.590762	0.999182
PRI2	YKL045W	chrXI	+	65.3566	0.619516	0.309472	2.00185	0.0453011	0.48784		65.3566	0.047992	0.318319	0.150767	0.880159	0.999182
PMA2	YPL036W	chrXVI	+	23.3615	0.61821	0.533568	1.15863	0.246605	0.927567		23.3615	0.600219	0.532937	1.12625	0.260061	0.999182
SEN2	YLR105C	chrXII	-	51.4248	0.61803	0.348731	1.77222	0.0763573	0.624828		51.4248	0.423622	0.351483	1.20524	0.22811	0.999182
SNR74	YNCM0015W	chrXIII	+	84.5168	0.617982	0.277661	2.22567	0.0260366	0.365086		84.5168	0.491253	0.27882	1.7619	0.0780864	0.815205
AMD2	YDR242W	chrIV	+	59.7881	0.617381	0.329839	1.87176	0.0612392	0.553474		59.7881	0.0453048	0.338942	0.133666	0.893667	0.999182
ISU1	YPL135W	chrXVI	+	476.166	0.617298	0.141257	4.37004	1.24e-05	0.00120455		476.166	0.140782	0.143418	0.981617	0.326289	0.999182
MRPL1	YDR116C	chrIV	-	80.9088	0.617011	0.287078	2.14928	0.031612	0.40834		80.9088	0.071649	0.29439	0.243381	0.80771	0.999182
NA	YBR284W	chrII	+	11.9704	0.61657	0.714909	0.862446	0.388442	0.982439		11.9704	0.137237	0.731989	0.187484	0.851281	0.999182
NA	YGR079W	chrVII	+	76.7608	0.615215	0.293762	2.09426	0.0362366	0.438287		76.7608	0.916467	0.288938	3.17185	0.0015147	0.110199
NA	YGR122W	chrVII	+	40.9498	0.611985	0.400134	1.52945	0.126153	0.752311		40.9498	0.596583	0.399605	1.49293	0.135455	0.946007
NA	YMR153C-A	chrXIII	-	16.8357	0.611365	0.58501	1.04505	0.296	0.960531		16.8357	-0.528309	0.626592	-0.843147	0.399146	0.999182
NA	YPL257W	chrXVI	+	36.6615	0.609429	0.421545	1.4457	0.148261	0.798683		36.6615	0.753572	0.417701	1.80409	0.0712169	0.788069
NA	YDR401W	chrIV	+	12.8136	0.608081	0.688407	0.883316	0.377066	0.977915		12.8136	0.665541	0.684795	0.971883	0.331109	0.999182
RGP1	YDR137W	chrIV	+	49.1216	0.607857	0.350972	1.73192	0.0832874	0.636839		49.1216	0.172022	0.358581	0.479729	0.63142	0.999182
MEP3	YPR138C	chrXVI	-	71.6912	0.606734	0.319564	1.89863	0.0576127	0.535615		71.6912	0.45339	0.321129	1.41186	0.157991	0.972787
MRPS5	YBR251W	chrII	+	55.0849	0.606301	0.333771	1.81652	0.069291	0.586411		55.0849	-0.0396387	0.345038	-0.114882	0.908539	0.999182
FMO1	YHR176W	chrVIII	+	40.5662	0.60491	0.4053	1.4925	0.135568	0.775585		40.5662	0.978678	0.397276	2.46347	0.0137598	0.369578
POL1	YNL102W	chrXIV	+	73.5825	0.60421	0.306227	1.97308	0.0484864	0.49892		73.5825	0.350153	0.309298	1.13209	0.257597	0.999182
PDR8	YLR266C	chrXII	-	27.4203	0.603983	0.464248	1.30099	0.193261	0.878139		27.4203	0.0711548	0.477247	0.149094	0.881479	0.999182
MRPS17	YMR188C	chrXIII	-	67.7113	0.602289	0.299501	2.01098	0.0443279	0.483098		67.7113	0.0198557	0.308556	0.0643506	0.948691	0.999182
ROX1	YPR065W	chrXVI	+	172.227	0.601723	0.208767	2.88228	0.0039481	0.116178		172.227	0.23524	0.211752	1.11092	0.266602	0.999182
PRM5	YIL117C	chrIX	-	322.587	0.601035	0.177685	3.38259	0.000718058	0.0351112		322.587	-0.0551217	0.181385	-0.303894	0.761209	0.999182
MZM1	YDR493W	chrIV	+	49.3621	0.600745	0.354058	1.69674	0.0897451	0.6545		49.3621	0.0393119	0.36412	0.107964	0.914024	0.999182
FMP46	YKR049C	chrXI	-	81.3368	0.599769	0.274654	2.18372	0.0289827	0.391061		81.3368	0.00754136	0.283039	0.0266442	0.978744	0.999182
COS3	YML132W	chrXIII	+	61.0962	0.599477	0.331339	1.80926	0.0704114	0.594063		61.0962	0.692569	0.329199	2.1038	0.0353957	0.585257
EGO4	YNR034W-A	chrXIV	+	43.4527	0.598296	0.364674	1.64063	0.100874	0.689833		43.4527	-0.314541	0.38434	-0.818393	0.413133	0.999182
THI20	YOL055C	chrXV	-	44.0809	0.597876	0.362841	1.64776	0.099401	0.685148		44.0809	-0.167842	0.37865	-0.443265	0.657574	0.999182
URC2	YDR520C	chrIV	-	26.9744	0.59745	0.485325	1.23103	0.218312	0.899896		26.9744	0.386383	0.489529	0.789296	0.429939	0.999182
PAM16	YJL104W	chrX	+	145.753	0.597227	0.218203	2.73703	0.00619969	0.157637		145.753	0.196195	0.221956	0.883937	0.37673	0.999182
PTH4	YOL114C	chrXV	-	20.4348	0.596807	0.559125	1.0674	0.285793	0.956539		20.4348	0.851674	0.550881	1.54602	0.1221	0.910059
MSC6	YOR354C	chrXV	-	61.9659	0.59596	0.321727	1.85238	0.0639713	0.562181		61.9659	0.268767	0.326439	0.82333	0.41032	0.999182
NA	YOR338W	chrXV	+	164.162	0.594804	0.230869	2.57637	0.00998432	0.208267		164.162	0.249279	0.233516	1.0675	0.285745	0.999182
SSC1	YJR045C	chrX	-	712.409	0.594396	0.120508	4.93244	8.12e-07	0.000119129		712.409	0.0896235	0.122328	0.732649	0.463772	0.999182
MMS21	YEL019C	chrV	-	12.4451	0.593908	0.674178	0.880936	0.378353	0.97843		12.4451	-0.571025	0.724461	-0.788206	0.430576	0.999182
TOS2	YGR221C	chrVII	-	102.178	0.593836	0.252425	2.35253	0.0186463	0.29825		102.178	0.11225	0.258142	0.434839	0.663679	0.999182
THI72	YOR192C	chrXV	-	29.9228	0.59348	0.464914	1.27654	0.201766	0.886478		29.9228	0.548379	0.464976	1.17937	0.238251	0.999182
SFG1	YOR315W	chrXV	+	40.4666	0.592591	0.412437	1.43681	0.150773	0.804708		40.4666	0.557212	0.412297	1.35148	0.176541	0.993721
CYC7	YEL039C	chrV	-	83.5267	0.591228	0.266048	2.22226	0.0262658	0.366504		83.5267	-0.925761	0.293121	-3.15829	0.00158697	0.113488
ENO1	YGR254W	chrVII	+	1442.4	0.591111	0.130451	4.5313	5.86e-06	0.000637084		1442.4	-0.265156	0.132014	-2.00855	0.0445852	0.654031
NA	YHR022C-A	chrVIII	-	11.9567	0.588675	0.699415	0.841668	0.399974	0.984362		11.9567	0.214595	0.71258	0.301152	0.763298	0.999182
IPK1	YDR315C	chrIV	-	24.5023	0.587326	0.500906	1.17253	0.240985	0.919731		24.5023	0.514426	0.501713	1.02534	0.305203	0.999182
ATP11	YNL315C	chrXIV	-	95.5186	0.586012	0.263608	2.22305	0.0262127	0.366504		95.5186	-0.121624	0.272791	-0.44585	0.655706	0.999182
MIC19	YFR011C	chrVI	-	96.9701	0.585818	0.260181	2.25158	0.024349	0.352881		96.9701	0.254335	0.263973	0.96349	0.335302	0.999182
MRPL6	YHR147C	chrVIII	-	89.3248	0.583754	0.269467	2.16633	0.0302859	0.396817		89.3248	-0.144903	0.27943	-0.518566	0.604063	0.999182
SYF2	YGR129W	chrVII	+	27.2686	0.583523	0.473061	1.2335	0.217388	0.899896		27.2686	0.0671632	0.485466	0.138348	0.889965	0.999182
NAT2	YGR147C	chrVII	-	117.061	0.583331	0.234401	2.48861	0.0128244	0.236934		117.061	0.247271	0.237942	1.0392	0.29871	0.999182
SRO9	YCL037C	chrIII	-	174.724	0.583231	0.200591	2.90757	0.00364251	0.111305		174.724	0.508205	0.200889	2.52978	0.0114134	0.349178
RGC1	YPR115W	chrXVI	+	78.1516	0.582952	0.30463	1.91364	0.0556657	0.526428		78.1516	0.313728	0.307753	1.01942	0.308006	0.999182
ATP25	YMR098C	chrXIII	-	42.4445	0.582718	0.394975	1.47533	0.140125	0.787673		42.4445	0.0900848	0.404038	0.222961	0.823566	0.999182
MRPS18	YNL306W	chrXIV	+	153.122	0.581816	0.221939	2.62151	0.00875411	0.192624		153.122	0.311522	0.22414	1.38985	0.164574	0.979481
TIM10	YHR005C-A	chrVIII	-	578.334	0.581372	0.131116	4.43403	9.25e-06	0.000962056		578.334	0.283369	0.132226	2.14306	0.0321087	0.572255
MIP6	YHR015W	chrVIII	+	12.8947	0.581297	0.702696	0.827239	0.408102	0.984362		12.8947	0.316289	0.71079	0.444983	0.656332	0.999182
MRP4	YHL004W	chrVIII	+	84.7839	0.580697	0.276278	2.10186	0.035566	0.432921		84.7839	0.158617	0.281703	0.563062	0.573392	0.999182
SNR57	YNCL0043C	chrXII	-	120.357	0.580696	0.232358	2.49915	0.0124493	0.235057		120.357	0.12282	0.237349	0.517464	0.604833	0.999182
RTC6	YPL183W-A	chrXVI	+	98.1655	0.580404	0.253115	2.29304	0.0218457	0.335965		98.1655	0.132765	0.258586	0.513429	0.607651	0.999182
DLD3	YEL071W	chrV	+	428.52	0.576473	0.177193	3.25336	0.00114047	0.049429		428.52	-0.101623	0.180119	-0.564199	0.572619	0.999182
KRE29	YER038C	chrV	-	20.1389	0.575416	0.535884	1.07377	0.282926	0.955501		20.1389	0.167838	0.547194	0.306724	0.759053	0.999182
SHC1	YER096W	chrV	+	14.7781	0.575303	0.637454	0.902502	0.36679	0.977915		14.7781	0.174576	0.65015	0.268516	0.788302	0.999182
MSD1	YPL104W	chrXVI	+	27.3973	0.57281	0.463008	1.23715	0.216032	0.899896		27.3973	-0.11748	0.480737	-0.244376	0.80694	0.999182
COA1	YIL157C	chrIX	-	123.504	0.572421	0.230159	2.48707	0.01288	0.236934		123.504	0.0351704	0.236074	0.14898	0.881569	0.999182
BNI4	YNL233W	chrXIV	+	41.3583	0.572164	0.386251	1.48133	0.138519	0.787673		41.3583	0.0266743	0.396965	0.0671956	0.946426	0.999182
PAU15	YIR041W	chrIX	+	27.3373	0.571375	0.476014	1.20033	0.23001	0.905636		27.3373	0.380793	0.479743	0.793744	0.427345	0.999182
BOP2	YLR267W	chrXII	+	25.5839	0.571115	0.500257	1.14164	0.253603	0.93243		25.5839	-0.364843	0.525568	-0.694187	0.487565	0.999182
AQR1	YNL065W	chrXIV	+	591.923	0.570447	0.160132	3.56236	0.000367534	0.0221333		591.923	0.454319	0.16038	2.83278	0.00461457	0.229762
EPL1	YFL024C	chrVI	-	61.4326	0.570351	0.319769	1.78363	0.0744834	0.61578		61.4326	0.511426	0.320042	1.598	0.110044	0.885618
MRH4	YGL064C	chrVII	-	37.1565	0.569456	0.407402	1.39777	0.162181	0.829796		37.1565	0.247313	0.413522	0.598064	0.549798	0.999182
INP2	YMR163C	chrXIII	-	24.7658	0.569353	0.493898	1.15278	0.249003	0.928955		24.7658	0.477417	0.495217	0.964056	0.335018	0.999182
THI12	YNL332W	chrXIV	+	14.7945	0.567717	0.61381	0.924908	0.355014	0.977915		14.7945	-0.895447	0.676937	-1.32279	0.185904	0.999182
SSA4	YER103W	chrV	+	88.6494	0.566905	0.263776	2.14919	0.0316194	0.40834		88.6494	-0.183396	0.274409	-0.668332	0.503922	0.999182
ZTA1	YBR046C	chrII	-	81.6112	0.566035	0.29967	1.88887	0.0589098	0.540441		81.6112	-0.386603	0.313242	-1.2342	0.217129	0.999182
PYC1	YGL062W	chrVII	+	180.431	0.564405	0.199789	2.82501	0.0047279	0.129418		180.431	-0.21093	0.206985	-1.01906	0.308175	0.999182
GFD2	YCL036W	chrIII	+	46.0464	0.562177	0.392889	1.43088	0.152465	0.806147		46.0464	0.816388	0.387641	2.10604	0.0352006	0.585257
NA	YOR169C	chrXV	-	12.3316	0.561942	0.690922	0.813322	0.416033	0.984362		12.3316	-0.058021	0.714189	-0.0812404	0.935251	0.999182
IMG2	YCR071C	chrIII	-	65.3114	0.561171	0.328305	1.70929	0.0873964	0.645417		65.3114	-0.0715163	0.337836	-0.211689	0.83235	0.999182
INO1	YJL153C	chrX	-	11.6623	0.560556	0.720003	0.778546	0.436247	0.985317		11.6623	0.345532	0.726764	0.475439	0.634474	0.999182
HAP4	YKL109W	chrXI	+	363.422	0.560169	0.167963	3.33508	0.000852761	0.0399889		363.422	-0.0845813	0.171394	-0.49349	0.621667	0.999182
ECO1	YFR027W	chrVI	+	13.0478	0.558844	0.675949	0.826755	0.408376	0.984362		13.0478	0.193598	0.688186	0.281317	0.778468	0.999182
SIP1	YDR422C	chrIV	-	46.8467	0.558828	0.357587	1.56278	0.118105	0.736036		46.8467	-0.0478288	0.369172	-0.129557	0.896917	0.999182
TIR4	YOR009W	chrXV	+	20.2759	0.55872	0.577357	0.96772	0.333184	0.972559		20.2759	0.71012	0.572043	1.24137	0.214467	0.999182
YEN1	YER041W	chrV	+	28.6379	0.558119	0.456545	1.22248	0.221525	0.901764		28.6379	0.308848	0.461767	0.66884	0.503597	0.999182
CTK1	YKL139W	chrXI	+	61.9853	0.557731	0.319017	1.74828	0.0804154	0.629265		61.9853	0.12273	0.325702	0.376816	0.70631	0.999182
IFM1	YOL023W	chrXV	+	29.7934	0.557359	0.454657	1.22589	0.220241	0.90079		29.7934	0.327682	0.459202	0.713589	0.475481	0.999182
NA	YAR053W	chrI	+	10.9555	0.556676	0.757796	0.734598	0.462584	0.986476		10.9555	0.755632	0.748488	1.00954	0.312713	0.999182
SLD2	YKL108W	chrXI	+	255.682	0.556624	0.180444	3.08474	0.0020373	0.0756844		255.682	0.0433274	0.18392	0.235578	0.81376	0.999182
MRP21	YBL090W	chrII	+	95.3779	0.556455	0.266615	2.08711	0.0368783	0.440461		95.3779	0.15785	0.271314	0.581798	0.560703	0.999182
MRPL51	YPR100W	chrXVI	+	110.662	0.556255	0.24125	2.30572	0.0211263	0.326658		110.662	0.146328	0.245867	0.595153	0.551741	0.999182
INA22	YIR024C	chrIX	-	36.96	0.553276	0.406455	1.36122	0.173444	0.845716		36.96	0.0717251	0.41636	0.172267	0.863228	0.999182
NA	YOR366W	chrXV	+	13.9164	0.552548	0.643032	0.859285	0.390184	0.983366		13.9164	-0.296169	0.675217	-0.438628	0.660931	0.999182
MSR1	YHR091C	chrVIII	-	36.9139	0.551079	0.411175	1.34025	0.180163	0.861079		36.9139	0.0997525	0.420258	0.23736	0.812377	0.999182
COG5	YNL051W	chrXIV	+	44.1958	0.55095	0.364686	1.51075	0.130851	0.759229		44.1958	0.117025	0.372865	0.313852	0.753633	0.999182
PML39	YML107C	chrXIII	-	32.0808	0.550266	0.430601	1.2779	0.201283	0.88596		32.0808	-0.233135	0.449593	-0.518545	0.604078	0.999182
ATP12	YJL180C	chrX	-	56.0919	0.549876	0.330203	1.66527	0.0958594	0.669681		56.0919	-0.0511326	0.340577	-0.150135	0.880658	0.999182
BMT5	YIL096C	chrIX	-	74.3639	0.54863	0.299683	1.8307	0.0671457	0.576787		74.3639	0.678482	0.297199	2.28292	0.0224351	0.491174
UTH1	YKR042W	chrXI	+	2276.54	0.547426	0.114695	4.7729	1.82e-06	0.000241604		2276.54	0.310764	0.114938	2.70374	0.00685633	0.278156
DFP4	YHL044W	chrVIII	+	12.1569	0.54708	0.711582	0.768822	0.441999	0.986476		12.1569	0.50764	0.711476	0.713503	0.475535	0.999182
FUI1	YBL042C	chrII	-	297.931	0.546199	0.162927	3.35241	0.000801118	0.0378777		297.931	0.422055	0.163474	2.58178	0.0098291	0.324442
NA	YLL059C	chrXII	-	13.4094	0.545209	0.639026	0.853188	0.393555	0.983851		13.4094	-0.521638	0.683473	-0.763217	0.445334	0.999182
FRD1	YEL047C	chrV	-	181.138	0.544906	0.196522	2.77276	0.00555839	0.144947		181.138	0.252752	0.198849	1.27107	0.203703	0.999182
ISM1	YPL040C	chrXVI	-	33.6431	0.544809	0.418166	1.30285	0.192625	0.877848		33.6431	0.0332328	0.429526	0.0773709	0.938328	0.999182
SWT21	YNL187W	chrXIV	+	80.8516	0.544702	0.31033	1.75523	0.0792193	0.624828		80.8516	0.686651	0.30796	2.22968	0.0257687	0.520929
MRP17	YKL003C	chrXI	-	84.2799	0.544636	0.273936	1.98818	0.0467914	0.492083		84.2799	0.289425	0.276983	1.04492	0.29606	0.999182
SNZ1	YMR096W	chrXIII	+	415.138	0.543895	0.428908	1.26809	0.204765	0.889021		415.138	-0.776388	0.43184	-1.79786	0.0721992	0.794297
FUS3	YBL016W	chrII	+	124.687	0.542309	0.239433	2.26497	0.0235147	0.34672		124.687	0.0100285	0.24505	0.0409241	0.967356	0.999182
RRI2	YOL117W	chrXV	+	32.1912	0.541996	0.454392	1.19279	0.23295	0.90826		32.1912	0.793132	0.44797	1.7705	0.0766437	0.810952
FTR1	YER145C	chrV	-	506.43	0.541232	0.335872	1.61143	0.107087	0.705811		506.43	0.764313	0.335369	2.27902	0.0226656	0.491174
BSC1	YDL037C	chrIV	-	77.0532	0.541178	0.703773	0.768967	0.441913	0.986476		77.0532	0.671277	0.702737	0.955232	0.339461	0.999182
MRPL4	YLR439W	chrXII	+	54.3971	0.540113	0.346658	1.55806	0.11922	0.739759		54.3971	0.393413	0.348472	1.12897	0.258912	0.999182
NA	YDR514C	chrIV	-	51.2452	0.540016	0.343065	1.57409	0.115466	0.725915		51.2452	0.238913	0.347961	0.686609	0.492329	0.999182
ECM10	YEL030W	chrV	+	14.8705	0.539753	0.649754	0.830704	0.406141	0.984362		14.8705	-0.0940345	0.670945	-0.140152	0.88854	0.999182
RPC19	YNL113W	chrXIV	+	309.16	0.539746	0.159683	3.38011	0.000724558	0.0351288		309.16	0.475591	0.159823	2.97574	0.0029228	0.165558
RXT2	YBR095C	chrII	-	43.2422	0.539699	0.369696	1.45985	0.144332	0.793251		43.2422	0.0262229	0.379742	0.0690544	0.944946	0.999182
POL30	YBR088C	chrII	-	239.25	0.53914	0.179306	3.00681	0.00264001	0.0909851		239.25	0.471686	0.179492	2.62789	0.00859165	0.309137
NA	YPL135C-A	chrXVI	-	14.718	0.536917	0.669337	0.802162	0.422459	0.984362		14.718	0.16546	0.680558	0.243123	0.80791	0.999182
COS1	YNL336W	chrXIV	+	62.2039	0.536882	0.334745	1.60385	0.108746	0.708306		62.2039	0.0443646	0.342097	0.129684	0.896816	0.999182
MRPS28	YDR337W	chrIV	+	69.508	0.534732	0.297491	1.79747	0.0722603	0.604388		69.508	0.0433613	0.304881	0.142224	0.886903	0.999182
GPA1	YHR005C	chrVIII	-	139.197	0.534101	0.233514	2.28723	0.0221821	0.338561		139.197	0.234136	0.236153	0.991459	0.321461	0.999182
NA	YOR289W	chrXV	+	23.8	0.533981	0.51534	1.03617	0.300122	0.965147		23.8	-0.0938123	0.531907	-0.17637	0.860003	0.999182
NA	YMR187C	chrXIII	-	92.2621	0.532748	0.268833	1.98171	0.0475119	0.4948		92.2621	0.152804	0.273404	0.558894	0.576234	0.999182
OXA1	YER154W	chrV	+	141.262	0.532335	0.220917	2.40967	0.0159671	0.27349		141.262	0.322307	0.222688	1.44735	0.1478	0.966358
ZNG1	YNR029C	chrXIV	-	69.6821	0.531409	0.310257	1.7128	0.0867488	0.645079		69.6821	0.335762	0.312593	1.07412	0.282769	0.999182
NA	YAL064W-B	chrI	+	19.3084	0.527973	0.554388	0.952354	0.340918	0.974927		19.3084	-0.38879	0.584058	-0.66567	0.505622	0.999182
YJU2	YKL095W	chrXI	+	26.5261	0.526913	0.478148	1.10199	0.270468	0.941683		26.5261	-0.0849155	0.493665	-0.17201	0.863429	0.999182
PIB1	YDR313C	chrIV	-	45.82	0.526003	0.359955	1.4613	0.143932	0.793251		45.82	0.027242	0.369391	0.0737483	0.941211	0.999182
GZF3	YJL110C	chrX	-	56.8507	0.525061	0.327346	1.60399	0.108715	0.708306		56.8507	0.22861	0.331897	0.688796	0.490951	0.999182
REC102	YLR329W	chrXII	+	6.29545	0.524323	0.955253	0.548883	0.583086	0.998763		6.29545	0.492853	0.954681	0.516249	0.60568	0.999182
ATG16	YMR159C	chrXIII	-	10.2822	0.524062	0.759963	0.68959	0.490452	0.996828		10.2822	-0.24361	0.793051	-0.307181	0.758705	0.999182
NA	YJR087W	chrX	+	43.851	0.523719	0.397017	1.31913	0.187124	0.868942		43.851	0.0441725	0.405589	0.108909	0.913274	0.999182
NA	YIL134C-A	chrIX	-	38.6055	0.522357	0.401634	1.30058	0.193402	0.878139		38.6055	0.578085	0.399584	1.44672	0.147976	0.966406
CYC3	YAL039C	chrI	-	234.653	0.521964	0.186682	2.79601	0.00517381	0.138315		234.653	-0.0416111	0.190794	-0.218095	0.827355	0.999182
VFA1	YER128W	chrV	+	55.6598	0.521673	0.353341	1.4764	0.139837	0.787673		55.6598	0.0365843	0.361032	0.101332	0.919287	0.999182
HAP3	YBL021C	chrII	-	29.8912	0.519052	0.449322	1.15519	0.248012	0.928394		29.8912	0.37116	0.451909	0.821316	0.411466	0.999182
LCP5	YER127W	chrV	+	105.827	0.518698	0.27116	1.91289	0.0557622	0.526428		105.827	0.324218	0.272909	1.18801	0.234829	0.999182
INP54	YOL065C	chrXV	-	34.5538	0.518475	0.425232	1.21928	0.22274	0.902432		34.5538	0.638784	0.421659	1.51493	0.12979	0.935642
MRP10	YDL045W-A	chrIV	+	113.124	0.518475	0.239369	2.166	0.030311	0.396817		113.124	0.216841	0.242567	0.893944	0.371352	0.999182
CHK1	YBR274W	chrII	+	34.4377	0.518221	0.440122	1.17745	0.239016	0.918341		34.4377	0.619067	0.437064	1.41642	0.156652	0.971508
DBP7	YKR024C	chrXI	-	124.257	0.517834	0.233677	2.21603	0.0266895	0.367789		124.257	0.278447	0.235927	1.18022	0.237911	0.999182
APC11	YDL008W	chrIV	+	48.4069	0.517802	0.353081	1.46653	0.142505	0.790759		48.4069	0.00870236	0.362428	0.0240113	0.980844	0.999182
NA	YGR111W	chrVII	+	44.023	0.517106	0.372492	1.38824	0.165065	0.832751		44.023	0.0797513	0.38066	0.209508	0.834052	0.999182
FYV4	YHR059W	chrVIII	+	56.2335	0.516709	0.370492	1.39466	0.163119	0.830252		56.2335	0.397957	0.371688	1.07068	0.284316	0.999182
NA	YHR022C	chrVIII	-	18.34	0.514697	0.560504	0.918275	0.358475	0.977915		18.34	-0.0341142	0.577425	-0.0590799	0.952888	0.999182
SAP4	YGL229C	chrVII	-	13.003	0.513172	0.654749	0.78377	0.433175	0.984362		13.003	-0.183654	0.681791	-0.269369	0.787646	0.999182
IMA1	YGR287C	chrVII	-	20.1175	0.512567	0.551237	0.929849	0.352449	0.977915		20.1175	0.393223	0.553515	0.710411	0.477449	0.999182
BNA2	YJR078W	chrX	+	55.9634	0.512308	0.334398	1.53203	0.125515	0.752311		55.9634	0.36609	0.336224	1.08883	0.27623	0.999182
2026-10-01	YKL134C	chrXI	-	24.8593	0.511567	0.515376	0.992609	0.3209	0.972559		24.8593	0.637114	0.511134	1.24647	0.212591	0.999182
PFA4	YOL003C	chrXV	-	40.6464	0.511004	0.39415	1.29647	0.194813	0.879588		40.6464	0.217161	0.399392	0.54373	0.586627	0.999182
AST2	YER101C	chrV	-	33.0381	0.509405	0.425616	1.19687	0.231359	0.907123		33.0381	0.149426	0.433216	0.344924	0.730152	0.999182
ARR3	YPR201W	chrXVI	+	11.7868	0.508928	0.718401	0.708418	0.478685	0.991598		11.7868	0.466669	0.718402	0.649594	0.515955	0.999182
CDC21	YOR074C	chrXV	-	71.3719	0.508435	0.332485	1.5292	0.126216	0.752311		71.3719	0.432431	0.332942	1.29882	0.194007	0.999182
NA	YDL085C-A	chrIV	-	165.454	0.507981	0.209039	2.43008	0.0150953	0.266545		165.454	0.146144	0.21215	0.688873	0.490903	0.999182
QRI5	YLR204W	chrXII	+	133.346	0.507109	0.226031	2.24353	0.0248626	0.353828		133.346	0.0130029	0.231169	0.0562483	0.955144	0.999182
ABM1	YJR108W	chrX	+	14.5817	0.506773	0.645418	0.785185	0.432345	0.984362		14.5817	0.381212	0.648329	0.587992	0.556537	0.999182
TOM20	YGR082W	chrVII	+	268.722	0.505876	0.18205	2.77877	0.00545648	0.144947		268.722	0.139451	0.184285	0.756713	0.449222	0.999182
AIM45	YPR004C	chrXVI	-	177.013	0.505144	0.205533	2.45772	0.013982	0.250756		177.013	0.292353	0.207086	1.41175	0.158024	0.972787
SNF3	YDL194W	chrIV	+	36.8655	0.504528	0.40735	1.23856	0.215508	0.899896		36.8655	-0.0129064	0.418229	-0.0308596	0.975382	0.999182
TUF1	YOR187W	chrXV	+	232.214	0.504048	0.178094	2.83023	0.00465148	0.12918		232.214	0.0564351	0.181434	0.311051	0.755762	0.999182
MIG2	YGL209W	chrVII	+	185.647	0.503615	0.204701	2.46025	0.0138841	0.250508		185.647	0.239531	0.206644	1.15915	0.246395	0.999182
KTI12	YKL110C	chrXI	-	156.396	0.503049	0.212396	2.36844	0.0178632	0.291986		156.396	0.19443	0.215082	0.903977	0.366008	0.999182
HAP2	YGL237C	chrVII	-	33.1454	0.502608	0.436163	1.15234	0.249182	0.928955		33.1454	0.265417	0.440636	0.60235	0.546942	0.999182
NA	YDR124W	chrIV	+	44.7929	0.502508	0.388384	1.29384	0.19572	0.879588		44.7929	0.25186	0.392361	0.641908	0.520933	0.999182
NA	YLR296W	chrXII	+	57.7805	0.502338	0.329111	1.52635	0.126924	0.752311		57.7805	0.143756	0.334719	0.429484	0.667571	0.999182
MTC2	YKL098W	chrXI	+	48.1916	0.501628	0.369068	1.35917	0.174091	0.845716		48.1916	0.433225	0.369546	1.17232	0.24107	0.999182
BFR2	YDR299W	chrIV	+	99.1406	0.501345	0.25943	1.93249	0.0532991	0.521411		99.1406	0.475286	0.259221	1.83352	0.0667256	0.754916
NA	YJR112W-A	chrX	+	57.3209	0.501021	0.344769	1.45321	0.146166	0.794125		57.3209	0.331323	0.346901	0.955094	0.33953	0.999182
TOM5	YPR133W-A	chrXVI	+	394.057	0.500475	0.151027	3.31381	0.000920331	0.0411345		394.057	0.332823	0.15172	2.19367	0.0282591	0.545016
YCS4	YLR272C	chrXII	-	42.6722	0.500275	0.406655	1.23022	0.218615	0.899896		42.6722	0.651789	0.403027	1.61723	0.105828	0.880786
YAP5	YIR018W	chrIX	+	28.5733	0.50009	0.454611	1.10004	0.271314	0.941683		28.5733	-0.0775758	0.468866	-0.165454	0.868586	0.999182
MRPL20	YKR085C	chrXI	-	87.4653	0.498929	0.276364	1.80534	0.0710221	0.596648		87.4653	0.0962227	0.281419	0.34192	0.732411	0.999182
RML2	YEL050C	chrV	-	96.228	0.498643	0.25589	1.94866	0.0513363	0.509133		96.228	-0.210897	0.265484	-0.794386	0.426971	0.999182
YAH1	YPL252C	chrXVI	-	193.491	0.497333	0.197571	2.51724	0.011828	0.227148		193.491	0.364882	0.198345	1.83963	0.065822	0.754916
RIM4	YHL024W	chrVIII	+	19.6785	0.497255	0.552787	0.899541	0.368364	0.977915		19.6785	0.0529522	0.565358	0.0936614	0.925378	0.999182
CRC1	YOR100C	chrXV	-	13.5779	0.496943	0.664627	0.747701	0.45464	0.986476		13.5779	0.237922	0.672666	0.353699	0.723564	0.999182
NA	YPL229W	chrXVI	+	50.4468	0.49621	0.37371	1.32779	0.184246	0.865862		50.4468	0.0968196	0.380141	0.254694	0.79896	0.999182
NA	YPR096C	chrXVI	-	13.1119	0.494897	0.712045	0.695036	0.487032	0.995823		13.1119	0.694923	0.703642	0.987608	0.323344	0.999182
MSA2	YKR077W	chrXI	+	35.8641	0.494125	0.41019	1.20463	0.228348	0.905636		35.8641	0.162353	0.416818	0.389505	0.696903	0.999182
XDJ1	YLR090W	chrXII	+	81.7173	0.493831	0.283012	1.74491	0.0810001	0.629265		81.7173	-0.065274	0.290752	-0.2245	0.822368	0.999182
CQD1	YPL109C	chrXVI	-	20.2526	0.493355	0.558531	0.883309	0.37707	0.977915		20.2526	0.0458859	0.570719	0.0804002	0.935919	0.999182
PET191	YJR034W	chrX	+	62.8162	0.4932	0.317951	1.55118	0.120858	0.745878		62.8162	0.351721	0.319592	1.10053	0.271102	0.999182
CSM3	YMR048W	chrXIII	+	27.4112	0.491644	0.472253	1.04106	0.297848	0.963223		27.4112	0.397797	0.473563	0.840009	0.400903	0.999182
MEF1	YLR069C	chrXII	-	82.8023	0.491077	0.278086	1.76591	0.0774103	0.624828		82.8023	-0.164801	0.287455	-0.573309	0.566435	0.999182
DCN1	YLR128W	chrXII	+	21.358	0.490813	0.524308	0.936115	0.349214	0.977915		21.358	0.156032	0.533117	0.292678	0.769768	0.999182
RAD34	YDR314C	chrIV	-	17.423	0.490743	0.591239	0.830024	0.406525	0.984362		17.423	0.0537969	0.604254	0.0890303	0.929058	0.999182
ULI1	YFR026C	chrVI	-	9.50177	0.490253	0.770841	0.635998	0.524778	0.998763		9.50177	0.00844645	0.791422	0.0106725	0.991485	0.999182
NSE4	YDL105W	chrIV	+	16.523	0.489756	0.65809	0.744208	0.456751	0.986476		16.523	0.234185	0.664628	0.352356	0.724572	0.999182
FUR4	YBR021W	chrII	+	56.979	0.489495	0.329801	1.48421	0.137752	0.784939		56.979	0.370897	0.33114	1.12006	0.262688	0.999182
TIP1	YBR067C	chrII	-	1532.69	0.488927	0.123738	3.9513	7.77e-05	0.00609158		1532.69	-0.077282	0.124704	-0.619724	0.535439	0.999182
PGD1	YGL025C	chrVII	-	44.21	0.487517	0.372777	1.3078	0.190942	0.876005		44.21	0.253081	0.376666	0.671898	0.501649	0.999182
NA	YER135C	chrV	-	87.6188	0.486148	0.284187	1.71066	0.0871437	0.645079		87.6188	0.29169	0.28621	1.01915	0.308134	0.999182
RRN11	YML043C	chrXIII	-	32.6634	0.485209	0.458388	1.05851	0.289823	0.956539		32.6634	0.792047	0.450837	1.75684	0.0789457	0.818204
AUS1	YOR011W	chrXV	+	34.7997	0.484711	0.427309	1.13434	0.256654	0.934426		34.7997	-0.0402238	0.438507	-0.0917289	0.926913	0.999182
SNR191	YNCN0019C	chrXIV	-	286.479	0.484194	0.180324	2.68513	0.0072502	0.175756		286.479	0.67048	0.178885	3.74811	0.000178173	0.0248616
NA	YOR097C	chrXV	-	42.701	0.483095	0.384755	1.25559	0.209264	0.896108		42.701	-0.29093	0.400719	-0.726018	0.467828	0.999182
PDH1	YPR002W	chrXVI	+	41.6561	0.482841	0.380501	1.26896	0.204455	0.888929		41.6561	-0.151706	0.393616	-0.385417	0.699929	0.999182
PRM7	YDL039C	chrIV	-	170.205	0.482469	0.386155	1.24942	0.211512	0.896196		170.205	0.657407	0.385074	1.70722	0.0877807	0.837643
HSH49	YOR319W	chrXV	+	64.8788	0.482079	0.316523	1.52305	0.127747	0.752311		64.8788	0.0679443	0.322682	0.210561	0.83323	0.999182
PAU17	YLL025W	chrXII	+	14.8942	0.482042	0.617282	0.78091	0.434855	0.9848		14.8942	-0.21089	0.642271	-0.32835	0.742647	0.999182
DFR1	YOR236W	chrXV	+	84.7199	0.481864	0.280982	1.71493	0.0863586	0.645079		84.7199	0.290347	0.283062	1.02574	0.305016	0.999182
CCC2	YDR270W	chrIV	+	69.4429	0.481765	0.31849	1.51265	0.130367	0.758899		69.4429	-0.227933	0.329203	-0.692378	0.4887	0.999182
XYL2	YLR070C	chrXII	-	9.48253	0.481353	0.776941	0.619548	0.535555	0.998763		9.48253	0.00638346	0.797093	0.00800843	0.99361	0.999182
NA	YDR406W-A	chrIV	+	16.7574	0.48062	0.597595	0.804258	0.421248	0.984362		16.7574	0.00734386	0.612397	0.011992	0.990432	0.999182
NA	YNL198C	chrXIV	-	33.8065	0.479996	0.428523	1.12012	0.262664	0.940268		33.8065	0.522003	0.426622	1.22357	0.221114	0.999182
SPP381	YBR152W	chrII	+	15.825	0.479153	0.609482	0.786163	0.431772	0.984362		15.825	0.393058	0.610987	0.643316	0.520019	0.999182
MRPL25	YGR076C	chrVII	-	48.7609	0.479101	0.355793	1.34657	0.178119	0.854881		48.7609	0.245419	0.35948	0.682706	0.494793	0.999182
FMP40	YPL222W	chrXVI	+	23.873	0.478356	0.480551	0.995434	0.319525	0.972559		23.873	-0.93683	0.52921	-1.77024	0.0766868	0.810952
SGT1	YOR057W	chrXV	+	69.5953	0.478129	0.306132	1.56184	0.118325	0.736605		69.5953	0.154756	0.310585	0.498271	0.618293	0.999182
DPB2	YPR175W	chrXVI	+	41.8821	0.477753	0.390027	1.22492	0.220604	0.900841		41.8821	0.678101	0.385208	1.76035	0.0783489	0.816455
RIB2	YOL066C	chrXV	-	49.0151	0.477607	0.36035	1.3254	0.18504	0.865862		49.0151	0.589255	0.357512	1.64821	0.0993097	0.863405
GYP8	YFL027C	chrVI	-	26.673	0.47662	0.473112	1.00742	0.313735	0.96968		26.673	0.0970134	0.482194	0.201192	0.840549	0.999182
NA	YER137C	chrV	-	38.7241	0.47635	0.393981	1.20907	0.226636	0.905141		38.7241	0.191808	0.399315	0.480342	0.630984	0.999182
MRP51	YPL118W	chrXVI	+	109.496	0.476093	0.240888	1.97641	0.0481084	0.497005		109.496	0.122444	0.244884	0.500011	0.617067	0.999182
VID24	YBR105C	chrII	-	327.954	0.476026	0.164723	2.88985	0.00385421	0.115445		327.954	0.421927	0.16479	2.5604	0.0104553	0.334988
NA	YNL234W	chrXIV	+	56.0516	0.475671	0.345017	1.37869	0.167991	0.836133		56.0516	0.213054	0.348839	0.610751	0.541365	0.999182
ACM1	YPL267W	chrXVI	+	77.4218	0.47382	0.283766	1.66976	0.0949678	0.668822		77.4218	0.118731	0.288585	0.411423	0.680762	0.999182
NOC2	YOR206W	chrXV	+	266.332	0.472757	0.177767	2.65942	0.00782747	0.180568		266.332	0.499012	0.177287	2.81471	0.00488206	0.239305
ANK1	YGL242C	chrVII	-	123.426	0.472594	0.231527	2.0412	0.0412307	0.46851		123.426	0.204833	0.234174	0.874704	0.381735	0.999182
PHM8	YER037W	chrV	+	70.4867	0.471813	0.305191	1.54596	0.122115	0.749591		70.4867	-0.515802	0.321638	-1.60367	0.108786	0.884044
CSS1	YIL169C	chrIX	-	10.7968	0.469484	0.805015	0.583199	0.559759	0.998763		10.7968	0.356361	0.80769	0.441211	0.65906	0.999182
PRP28	YDR243C	chrIV	-	34.5426	0.468517	0.424878	1.10271	0.270153	0.941683		34.5426	0.526786	0.422636	1.24643	0.212606	0.999182
LEA1	YPL213W	chrXVI	+	52.0928	0.468192	0.344863	1.35762	0.174585	0.845726		52.0928	0.0984821	0.351056	0.280531	0.77907	0.999182
MPO1	YGL010W	chrVII	+	20.9086	0.467593	0.535644	0.872956	0.382687	0.979867		20.9086	-0.0301605	0.549671	-0.0548701	0.956242	0.999182
SMC1	YFL008W	chrVI	+	69.4742	0.466514	0.308235	1.5135	0.130152	0.758899		69.4742	0.120366	0.31305	0.384496	0.700611	0.999182
PIH1	YHR034C	chrVIII	-	39.4384	0.466369	0.397205	1.17413	0.240343	0.919731		39.4384	0.00374373	0.406419	0.00921149	0.99265	0.999182
HSP104	YLL026W	chrXII	+	133.905	0.464713	0.225247	2.06312	0.039101	0.454669		133.905	-0.678321	0.239388	-2.83357	0.00460319	0.229762
MRPS12	YNR036C	chrXIV	-	216.298	0.46414	0.183543	2.52878	0.011446	0.22349		216.298	0.00776465	0.187131	0.0414933	0.966903	0.999182
COA2	YPL189C-A	chrXVI	-	131.122	0.463512	0.240703	1.92566	0.0541464	0.523263		131.122	-0.0735196	0.246162	-0.298663	0.765197	0.999182
MMT1	YMR177W	chrXIII	+	44.7844	0.46048	0.383031	1.2022	0.229286	0.905636		44.7844	0.352864	0.384291	0.91822	0.358503	0.999182
AHP1	YLR109W	chrXII	+	3882.42	0.458698	0.101827	4.5047	6.65e-06	0.000704194		3882.42	-0.0827058	0.102269	-0.808706	0.418684	0.999182
MRPL8	YJL063C	chrX	-	82.9403	0.458569	0.273223	1.67837	0.0932752	0.664542		82.9403	0.158266	0.277068	0.571219	0.567851	0.999182
SYS1	YJL004C	chrX	-	82.0017	0.458261	0.27801	1.64836	0.0992788	0.685131		82.0017	0.168178	0.281675	0.597063	0.550465	0.999182
CDD1	YLR245C	chrXII	-	233.569	0.458248	0.178849	2.56221	0.0104008	0.211516		233.569	0.388712	0.17906	2.17084	0.0299432	0.558687
ESC8	YOL017W	chrXV	+	30.5574	0.458208	0.45895	0.998383	0.318094	0.972219		30.5574	0.428033	0.458662	0.933222	0.350706	0.999182
POC4	YPL144W	chrXVI	+	62.0572	0.457125	0.323382	1.41357	0.157487	0.815368		62.0572	0.652046	0.319526	2.04066	0.0412843	0.625205
NA	YER175W-A	chrV	+	16.3681	0.456555	0.585425	0.779869	0.435468	0.984861		16.3681	-1.03395	0.648288	-1.59489	0.110737	0.885618
RDL2	YOR286W	chrXV	+	159.657	0.456309	0.213812	2.13415	0.0328302	0.417381		159.657	0.177029	0.21615	0.81901	0.412781	0.999182
NA	YBR238C	chrII	-	106.256	0.456247	0.259874	1.75565	0.0791482	0.624828		106.256	0.326886	0.260918	1.25283	0.210267	0.999182
LYS5	YGL154C	chrVII	-	37.9791	0.456196	0.423129	1.07815	0.280968	0.951894		37.9791	0.271318	0.426079	0.636779	0.524269	0.999182
FET3	YMR058W	chrXIII	+	862.153	0.456124	0.52389	0.870648	0.383946	0.979867		862.153	0.526869	0.523806	1.00585	0.314489	0.999182
MRP1	YDR347W	chrIV	+	125.525	0.455791	0.238153	1.91386	0.0556382	0.526428		125.525	-0.0263475	0.243242	-0.108318	0.913743	0.999182
RDH54	YBR073W	chrII	+	103.038	0.455778	0.248264	1.83586	0.0663782	0.575378		103.038	-0.0396111	0.254392	-0.155709	0.876262	0.999182
SFK1	YKL051W	chrXI	+	191.104	0.455734	0.205657	2.21599	0.0266922	0.367789		191.104	0.0563345	0.208761	0.269852	0.787274	0.999182
PUT1	YLR142W	chrXII	+	24.3753	0.454538	0.497048	0.914477	0.360466	0.977915		24.3753	0.527947	0.493921	1.06889	0.285119	0.999182
TOM70	YNL121C	chrXIV	-	201.851	0.454353	0.187431	2.42411	0.0153461	0.26931		201.851	0.106385	0.190175	0.559405	0.575885	0.999182
DNL4	YOR005C	chrXV	-	34.6562	0.453577	0.420548	1.07854	0.280794	0.951894		34.6562	-0.0856994	0.432394	-0.198197	0.842891	0.999182
ALR2	YFL050C	chrVI	-	25.1433	0.452805	0.492968	0.918529	0.358342	0.977915		25.1433	0.164345	0.499678	0.328903	0.742229	0.999182
PAR32	YDL173W	chrIV	+	164.438	0.452685	0.204129	2.21764	0.0265795	0.367789		164.438	0.0994602	0.207279	0.479837	0.631343	0.999182
CYR1	YJL005W	chrX	+	56.0854	0.452285	0.347307	1.30226	0.192827	0.877848		56.0854	-0.321172	0.360884	-0.88996	0.373487	0.999182
NA	YMR158C-A	chrXIII	-	15.9015	0.451346	0.604648	0.746461	0.455389	0.986476		15.9015	-0.0438972	0.620987	-0.0706894	0.943645	0.999182
MET32	YDR253C	chrIV	-	16.5643	0.450877	0.63382	0.711364	0.476858	0.990992		16.5643	0.634743	0.626813	1.01265	0.311227	0.999182
MRPS8	YMR158W	chrXIII	+	56.3814	0.449375	0.327936	1.37031	0.170589	0.841776		56.3814	-0.0361919	0.336222	-0.107643	0.914279	0.999182
NSE3	YDR288W	chrIV	+	50.6016	0.44867	0.354615	1.26523	0.205788	0.891231		50.6016	0.0832218	0.360756	0.230687	0.817558	0.999182
RSM7	YJR113C	chrX	-	108.815	0.448354	0.255244	1.75657	0.0789912	0.624828		108.815	0.0702058	0.259375	0.270673	0.786643	0.999182
YDC1	YPL087W	chrXVI	+	84.9885	0.446926	0.266568	1.67659	0.0936226	0.666005		84.9885	-0.285216	0.277497	-1.02782	0.304035	0.999182
PET123	YOR158W	chrXV	+	83.0926	0.446415	0.274709	1.62504	0.104153	0.699366		83.0926	0.0551335	0.279942	0.196946	0.843869	0.999182
PEX11	YOL147C	chrXV	-	102.699	0.446229	0.256657	1.73862	0.0821011	0.63302		102.699	0.105359	0.26051	0.404433	0.685895	0.999182
VVS1	YBR241C	chrII	-	26.8098	0.445658	0.480148	0.928168	0.35332	0.977915		26.8098	-0.146945	0.495178	-0.296753	0.766655	0.999182
NA	YLR202C	chrXII	-	131.986	0.444552	0.231773	1.91805	0.0551049	0.52604		131.986	0.182979	0.234191	0.781326	0.434611	0.999182
SSF1	YHR066W	chrVIII	+	145.803	0.444343	0.224213	1.98179	0.0475026	0.4948		145.803	0.37568	0.224476	1.67359	0.0942112	0.853571
GRX1	YCL035C	chrIII	-	341.011	0.443057	0.155222	2.85435	0.00431254	0.12398		341.011	-0.14712	0.158871	-0.926035	0.354428	0.999182
NA	YHR033W	chrVIII	+	34.3204	0.44292	0.418047	1.0595	0.289373	0.956539		34.3204	0.191127	0.422966	0.451872	0.651361	0.999182
COX10	YPL172C	chrXVI	-	36.5596	0.442724	0.414857	1.06717	0.285895	0.956539		36.5596	-0.097416	0.426313	-0.228508	0.819251	0.999182
RCI50	YKL133C	chrXI	-	29.9868	0.442387	0.483216	0.915506	0.359926	0.977915		29.9868	-0.128477	0.495989	-0.259031	0.795611	0.999182
UGA1	YGR019W	chrVII	+	96.62	0.441674	0.257987	1.712	0.0868962	0.645079		96.62	-0.355195	0.268999	-1.32043	0.186691	0.999182
REI1	YBR267W	chrII	+	167.691	0.441282	0.2079	2.12257	0.0337901	0.423933		167.691	0.220561	0.209616	1.05221	0.292702	0.999182
FIT2	YOR382W	chrXV	+	547.362	0.441281	0.892199	0.494599	0.620883	0.998763		547.362	0.203367	0.892332	0.227905	0.81972	0.999182
NA	YGL072C	chrVII	-	46.4889	0.438995	0.370101	1.18615	0.235563	0.912032		46.4889	0.50523	0.368023	1.37282	0.169807	0.988789
MEP1	YGR121C	chrVII	-	14.92	0.438865	0.64023	0.68548	0.493041	0.997087		14.92	0.831822	0.625399	1.33007	0.183496	0.999182
RSM26	YJR101W	chrX	+	98.5018	0.438278	0.251227	1.74454	0.0810642	0.629265		98.5018	0.0081449	0.256622	0.0317389	0.97468	0.999182
CTR1	YPR124W	chrXVI	+	165.213	0.438234	0.202924	2.1596	0.0308039	0.402349		165.213	-0.190431	0.209121	-0.910624	0.362494	0.999182
URA2	YJL130C	chrX	-	1350	0.438231	0.109888	3.98797	6.66e-05	0.00569047		1350	0.125003	0.110507	1.13117	0.257984	0.999182
NA	YJR079W	chrX	+	57.6812	0.438166	0.329674	1.32909	0.183819	0.865536		57.6812	0.473991	0.32832	1.44368	0.148828	0.966999
CMR3	YPR013C	chrXVI	-	38.9913	0.438146	0.403049	1.08708	0.277002	0.948939		38.9913	0.559204	0.399635	1.39929	0.161727	0.977274
PDR15	YDR406W	chrIV	+	24.9677	0.437939	0.483748	0.905303	0.365305	0.977915		24.9677	0.0377835	0.493914	0.0764981	0.939023	0.999182
ELG1	YOR144C	chrXV	-	29.9099	0.437628	0.457027	0.957554	0.338288	0.974761		29.9099	0.461525	0.45543	1.01338	0.310877	0.999182
RAD53	YPL153C	chrXVI	-	19.3495	0.436583	0.568391	0.768104	0.442425	0.986476		19.3495	0.899294	0.553452	1.62488	0.104188	0.880786
MRPL15	YLR312W-A	chrXII	+	79.3134	0.436257	0.298657	1.46073	0.144089	0.793251		79.3134	0.144773	0.302218	0.479033	0.631915	0.999182
NA	YLR460C	chrXII	-	11.9816	0.435695	0.721988	0.603466	0.546199	0.998763		11.9816	0.559991	0.715664	0.782477	0.433934	0.999182
NA	YBL113C	chrII	-	34.0954	0.435265	0.425092	1.02393	0.305867	0.96639		34.0954	0.445974	0.423887	1.05211	0.29275	0.999182
RMP1	YLR145W	chrXII	+	39.3059	0.434694	0.391845	1.10935	0.267278	0.941683		39.3059	0.244641	0.395063	0.619245	0.535755	0.999182
TIM23	YNR017W	chrXIV	+	312.451	0.434275	0.16199	2.68088	0.00734293	0.175861		312.451	0.149198	0.163613	0.911894	0.361824	0.999182
FMP48	YGR052W	chrVII	+	7.6356	0.433561	0.869531	0.498615	0.618051	0.998763		7.6356	0.308295	0.87371	0.352857	0.724195	0.999182
TSR2	YLR435W	chrXII	+	162.643	0.432634	0.207153	2.08848	0.036755	0.440075		162.643	0.361158	0.207438	1.74104	0.0816762	0.82693
HSP82	YPL240C	chrXVI	-	196.891	0.432038	0.338013	1.27817	0.201191	0.88596		196.891	-0.730639	0.344752	-2.11932	0.0340635	0.577788
MRPS16	YPL013C	chrXVI	-	116.722	0.431639	0.241739	1.78556	0.0741713	0.614977		116.722	-0.0165609	0.24671	-0.0671268	0.946481	0.999182
NDJ1	YOL104C	chrXV	-	57.8103	0.430258	0.337152	1.27615	0.201902	0.886478		57.8103	0.061112	0.342891	0.178226	0.858546	0.999182
PER1	YCR044C	chrIII	-	57.3936	0.429173	0.352322	1.21813	0.223175	0.902432		57.3936	0.097359	0.357207	0.272557	0.785194	0.999182
SFI1	YLL003W	chrXII	+	29.8172	0.429164	0.474998	0.903506	0.366257	0.977915		29.8172	0.435096	0.473864	0.918187	0.358521	0.999182
RAD7	YJR052W	chrX	+	64.384	0.428957	0.306725	1.39851	0.161961	0.829523		64.384	-0.10513	0.315428	-0.333295	0.738912	0.999182
MRP2	YPR166C	chrXVI	-	116.085	0.428346	0.242457	1.76669	0.0772799	0.624828		116.085	0.257881	0.243981	1.05697	0.290525	0.999182
KAR3	YPR141C	chrXVI	-	20.5937	0.428282	0.565236	0.757705	0.448627	0.986476		20.5937	-0.021363	0.577336	-0.0370027	0.970483	0.999182
MCM10	YIL150C	chrIX	-	29.046	0.427957	0.470587	0.909412	0.363133	0.977915		29.046	0.166767	0.476011	0.350343	0.726081	0.999182
YPI1	YFR003C	chrVI	-	73.0946	0.427834	0.302188	1.41579	0.156838	0.814377		73.0946	-0.154957	0.310807	-0.498564	0.618087	0.999182
PIR3	YKL163W	chrXI	+	613.855	0.427789	0.158504	2.69892	0.00695645	0.172285		613.855	-0.218807	0.160729	-1.36134	0.173406	0.992181
CSM1	YCR086W	chrIII	+	43.6304	0.427704	0.381449	1.12126	0.262176	0.939205		43.6304	0.369284	0.38177	0.967293	0.333398	0.999182
DAT1	YML113W	chrXIII	+	86.6701	0.427449	0.282129	1.51508	0.129751	0.758899		86.6701	0.454763	0.281184	1.61731	0.105811	0.880786
SDH4	YDR178W	chrIV	+	120.568	0.427175	0.241694	1.76742	0.0771577	0.624828		120.568	0.076095	0.245316	0.310192	0.756415	0.999182
SHG1	YBR258C	chrII	-	50.2964	0.42704	0.379066	1.12656	0.259929	0.938204		50.2964	0.192135	0.382473	0.502348	0.615423	0.999182
ISY1	YJR050W	chrX	+	53.4717	0.427037	0.34245	1.247	0.212396	0.896665		53.4717	-0.288154	0.355673	-0.810164	0.417846	0.999182
MIX17	YMR002W	chrXIII	+	339.107	0.426905	0.15376	2.77644	0.00549571	0.144947		339.107	0.096946	0.15564	0.622885	0.53336	0.999182
NA	YGL108C	chrVII	-	67.9741	0.42634	0.298564	1.42797	0.153301	0.807581		67.9741	-0.0406537	0.305819	-0.132934	0.894246	0.999182
RTS2	YOR077W	chrXV	+	166.029	0.42416	0.209999	2.01982	0.0434023	0.478297		166.029	0.253409	0.211232	1.19967	0.230267	0.999182
CTA1	YDR256C	chrIV	-	24.5418	0.424102	0.493043	0.860173	0.389694	0.982565		24.5418	0.494672	0.489973	1.00959	0.312692	0.999182
SNR62	YNCO0015C	chrXV	-	129.951	0.424073	0.509858	0.831746	0.405552	0.984362		129.951	0.52083	0.509157	1.02293	0.306343	0.999182
PDS1	YDR113C	chrIV	-	22.9462	0.423587	0.540738	0.783349	0.433422	0.984362		22.9462	0.911193	0.526789	1.72971	0.083682	0.827884
HXT7	YDR342C	chrIV	-	118.909	0.42325	0.427341	0.990427	0.321965	0.972559		118.909	-0.693109	0.435715	-1.59074	0.111668	0.888284
ADF1	YCL058W-A	chrIII	+	151.36	0.423037	0.240836	1.75654	0.078997	0.624828		151.36	0.212339	0.242389	0.876028	0.381015	0.999182
PHO84	YML123C	chrXIII	-	1697.17	0.422833	0.114482	3.69344	0.000221237	0.0145483		1697.17	0.210408	0.114775	1.83322	0.0667693	0.754916
DPC7	YKL065W-A	chrXI	+	15.4486	0.422304	0.652365	0.647342	0.51741	0.998763		15.4486	0.800119	0.638748	1.25264	0.210338	0.999182
TIM12	YBR091C	chrII	-	78.6291	0.422087	0.323915	1.30308	0.192547	0.877848		78.6291	0.385699	0.323829	1.19106	0.233631	0.999182
CBP4	YGR174C	chrVII	-	70.9234	0.421491	0.310031	1.35952	0.173983	0.845716		70.9234	0.279254	0.31155	0.896336	0.370074	0.999182
RPS14B	YJL191W	chrX	+	846.888	0.420161	0.120778	3.47878	0.000503705	0.0277153		846.888	0.396744	0.120712	3.2867	0.0010137	0.0878692
CWC22	YGR278W	chrVII	+	35.3484	0.418958	0.418751	1.00049	0.317071	0.972219		35.3484	0.727617	0.410997	1.77037	0.0766654	0.810952
NA	YPL247C	chrXVI	-	37.8587	0.418539	0.398765	1.04959	0.293907	0.960253		37.8587	-0.184206	0.41188	-0.447233	0.654707	0.999182
GPP2	YER062C	chrV	-	214.615	0.418274	0.192524	2.17258	0.0298117	0.396634		214.615	-0.187804	0.197368	-0.95154	0.34133	0.999182
VAM7	YGL212W	chrVII	+	65.7114	0.417809	0.304801	1.37076	0.17045	0.841776		65.7114	0.126202	0.309037	0.408373	0.683	0.999182
NOG2	YNR053C	chrXIV	-	427.555	0.41712	0.147118	2.83527	0.00457864	0.129037		427.555	0.468545	0.146621	3.19563	0.00139528	0.105032
FCY21	YER060W	chrV	+	55.1646	0.416948	0.347658	1.19931	0.230409	0.906474		55.1646	0.478281	0.345868	1.38284	0.166713	0.980097
NA	YLR146W-A	chrXII	+	139.942	0.416817	0.224118	1.85981	0.0629124	0.558885		139.942	0.424992	0.223581	1.90084	0.0573228	0.714474
CWC15	YDR163W	chrIV	+	59.4298	0.416161	0.330648	1.25862	0.208166	0.89552		59.4298	-0.0609377	0.338353	-0.180101	0.857073	0.999182
MIF2	YKL089W	chrXI	+	24.4051	0.416107	0.491063	0.84736	0.396795	0.984362		24.4051	0.378206	0.490946	0.770362	0.441085	0.999182
CFT2	YLR115W	chrXII	+	47.9367	0.41564	0.376532	1.10386	0.269653	0.941683		47.9367	0.500878	0.374199	1.33853	0.180723	0.997991
NA	YLR101C	chrXII	-	27.0628	0.415075	0.495795	0.83719	0.402486	0.984362		27.0628	0.147891	0.501471	0.294914	0.768059	0.999182
ZRT2	YLR130C	chrXII	-	145.96	0.414399	0.224778	1.84359	0.0652425	0.568982		145.96	0.226009	0.226274	0.998831	0.317877	0.999182
CYC2	YOR037W	chrXV	+	38.4619	0.413863	0.398922	1.03745	0.299524	0.965147		38.4619	0.283221	0.400854	0.706544	0.47985	0.999182
FYV10	YIL097W	chrIX	+	22.9641	0.412526	0.512236	0.805343	0.420622	0.984362		22.9641	-0.588973	0.543122	-1.08442	0.278177	0.999182
IBD2	YNL164C	chrXIV	-	59.0521	0.412255	0.337055	1.22311	0.221289	0.901764		59.0521	0.243079	0.339192	0.71664	0.473596	0.999182
PAP2	YOL115W	chrXV	+	195.417	0.411814	0.194736	2.11473	0.0344528	0.426515		195.417	0.358359	0.194829	1.83935	0.0658642	0.754916
ZPR1	YGR211W	chrVII	+	174.605	0.4118	0.205771	2.00126	0.0453646	0.48784		174.605	0.274227	0.206657	1.32697	0.18452	0.999182
NA	YIL014C-A	chrIX	-	38.2329	0.411083	0.416133	0.987866	0.323218	0.972559		38.2329	0.455966	0.414315	1.10053	0.271102	0.999182
COS2	YBR302C	chrII	-	59.3345	0.41088	0.33531	1.22537	0.220435	0.90079		59.3345	-0.00528191	0.341801	-0.0154532	0.987671	0.999182
RAD30	YDR419W	chrIV	+	33.9941	0.410033	0.418916	0.978795	0.327681	0.972559		33.9941	0.318056	0.420085	0.757122	0.448977	0.999182
SNR55	YNCL0042C	chrXII	-	62.0238	0.409367	0.332374	1.23165	0.218082	0.899896		62.0238	0.5307	0.32975	1.6094	0.107529	0.880786
YHC1	YLR298C	chrXII	-	67.5447	0.409271	0.304725	1.34308	0.179246	0.858848		67.5447	0.157719	0.30817	0.511793	0.608796	0.999182
ZDS1	YMR273C	chrXIII	-	55.8402	0.409004	0.34002	1.20288	0.229023	0.905636		55.8402	0.0789256	0.345197	0.228639	0.81915	0.999182
YOX1	YML027W	chrXIII	+	22.6969	0.408999	0.519809	0.786826	0.431384	0.984362		22.6969	0.494892	0.516224	0.958677	0.337722	0.999182
IRR1	YIL026C	chrIX	-	48.9775	0.408871	0.35174	1.16242	0.245064	0.9242		48.9775	0.302506	0.352987	0.85699	0.39145	0.999182
ZIP1	YDR285W	chrIV	+	17.5499	0.407451	0.56664	0.719065	0.472101	0.990049		17.5499	-0.272677	0.589609	-0.462472	0.643743	0.999182
RNT1	YMR239C	chrXIII	-	69.0536	0.406988	0.309326	1.31572	0.188266	0.869928		69.0536	0.532345	0.30674	1.7355	0.082653	0.82693
VAB2	YEL005C	chrV	-	35.7463	0.406605	0.421823	0.963925	0.335084	0.972649		35.7463	-0.201019	0.43516	-0.461943	0.644122	0.999182
TAD1	YGL243W	chrVII	+	39.9311	0.406395	0.386427	1.05167	0.29295	0.960253		39.9311	0.0289181	0.393898	0.0734152	0.941476	0.999182
TOS6	YNL300W	chrXIV	+	417.669	0.406026	0.311821	1.30211	0.192878	0.877848		417.669	0.547436	0.311351	1.75826	0.0787037	0.818194
RAD18	YCR066W	chrIII	+	27.3565	0.404884	0.458273	0.8835	0.376966	0.977915		27.3565	-0.169534	0.473254	-0.358231	0.720171	0.999182
RSF1	YMR030W	chrXIII	+	28.7458	0.404523	0.480928	0.841131	0.400275	0.984362		28.7458	0.348904	0.481243	0.725006	0.468448	0.999182
NA	YER158C	chrV	-	50.2872	0.404181	0.369495	1.09387	0.274011	0.943093		50.2872	0.283516	0.370905	0.76439	0.444635	0.999182
TIR1	YER011W	chrV	+	39.2515	0.403927	0.415819	0.971399	0.33135	0.972559		39.2515	0.259046	0.417929	0.619834	0.535367	0.999182
YRF1-6	YNL339C	chrXIV	-	15.7619	0.402398	0.603472	0.666805	0.504897	0.998763		15.7619	0.152939	0.610871	0.250361	0.802308	0.999182
SKG6	YHR149C	chrVIII	-	70.9375	0.402358	0.315083	1.27699	0.201606	0.886478		70.9375	0.570597	0.311976	1.82898	0.0674032	0.759082
RIB1	YBL033C	chrII	-	131.428	0.402207	0.227825	1.76542	0.077493	0.624828		131.428	0.18915	0.229751	0.823282	0.410348	0.999182
LST8	YNL006W	chrXIV	+	48.9154	0.402053	0.348221	1.15459	0.248258	0.928394		48.9154	-0.0577101	0.356746	-0.161768	0.871489	0.999182
MRPL16	YBL038W	chrII	+	71.9307	0.402033	0.295287	1.3615	0.173356	0.845716		71.9307	-0.0890033	0.302668	-0.294063	0.76871	0.999182
YPT11	YNL304W	chrXIV	+	18.6679	0.401005	0.59899	0.669469	0.503197	0.998763		18.6679	0.554879	0.59321	0.935384	0.349591	0.999182
EST2	YLR318W	chrXII	+	14.4972	0.400486	0.649338	0.61676	0.537393	0.998763		14.4972	0.265151	0.652665	0.406259	0.684553	0.999182
AMD1	YML035C	chrXIII	-	124.111	0.400358	0.236086	1.69582	0.0899209	0.6545		124.111	0.162061	0.238356	0.679912	0.49656	0.999182
CTL1	YMR180C	chrXIII	-	116.732	0.400292	0.234901	1.70409	0.0883648	0.647292		116.732	0.0998945	0.238116	0.41952	0.674836	0.999182
UPA2	YMR310C	chrXIII	-	286.275	0.400267	0.172118	2.32554	0.0200433	0.314158		286.275	0.330747	0.172298	1.91963	0.0549053	0.7082
RPC37	YKR025W	chrXI	+	141.971	0.399704	0.227903	1.75383	0.0794593	0.624828		141.971	0.0347907	0.231337	0.15039	0.880457	0.999182
THI74	YDR438W	chrIV	+	32.6754	0.399434	0.447006	0.893576	0.371549	0.977915		32.6754	0.108485	0.452813	0.239581	0.810655	0.999182
GPI19	YDR437W	chrIV	+	32.3462	0.399426	0.446614	0.894343	0.371139	0.977915		32.3462	0.061948	0.453621	0.136563	0.891376	0.999182
MEU1	YLR017W	chrXII	+	218.369	0.398654	0.18203	2.19004	0.0285211	0.385743		218.369	0.104221	0.184196	0.565814	0.57152	0.999182
ATG8	YBL078C	chrII	-	122.43	0.397706	0.23033	1.72668	0.0842247	0.638731		122.43	-0.321428	0.239019	-1.34478	0.178697	0.994245
PUS2	YGL063W	chrVII	+	89.0208	0.396452	0.278758	1.42221	0.154966	0.810266		89.0208	0.126855	0.281881	0.45003	0.652689	0.999182
NOP8	YOL144W	chrXV	+	69.9797	0.39639	0.305364	1.29809	0.194256	0.879226		69.9797	0.291958	0.306337	0.953062	0.340559	0.999182
LAA2	YBL010C	chrII	-	23.5082	0.396206	0.492807	0.803978	0.421409	0.984362		23.5082	-0.197758	0.50972	-0.387973	0.698036	0.999182
PAL1	YDR348C	chrIV	-	97.6388	0.395906	0.267873	1.47796	0.139419	0.787673		97.6388	0.407373	0.267186	1.52468	0.127339	0.926852
SAN1	YDR143C	chrIV	-	117.993	0.394957	0.238355	1.65701	0.0975166	0.675833		117.993	0.382303	0.238001	1.60631	0.108206	0.881836
ORC4	YPR162C	chrXVI	-	35.2785	0.394006	0.408426	0.964694	0.334698	0.972649		35.2785	0.138332	0.413472	0.334562	0.737956	0.999182
GYP1	YOR070C	chrXV	-	50.8689	0.392894	0.369339	1.06378	0.28743	0.956539		50.8689	0.390368	0.36863	1.05897	0.289613	0.999182
CHL4	YDR254W	chrIV	+	19.6174	0.391536	0.550028	0.711848	0.476559	0.990992		19.6174	0.165161	0.55581	0.297154	0.766349	0.999182
MSM1	YGR171C	chrVII	-	27.2511	0.390858	0.462364	0.845347	0.397917	0.984362		27.2511	0.203009	0.466278	0.435383	0.663285	0.999182
PHB1	YGR132C	chrVII	-	198.299	0.390407	0.192729	2.02569	0.0427971	0.4745		198.299	-0.0317874	0.196184	-0.162029	0.871283	0.999182
RNR1	YER070W	chrV	+	307.316	0.390249	0.159521	2.44639	0.0144296	0.256371		307.316	0.399089	0.159169	2.50733	0.0121648	0.356068
TOM6	YOR045W	chrXV	+	318.915	0.390224	0.165157	2.36274	0.0181405	0.293267		318.915	0.109352	0.166704	0.655968	0.511845	0.999182
NA	YLL054C	chrXII	-	19.5724	0.38999	0.582647	0.669341	0.503278	0.998763		19.5724	0.173399	0.587828	0.294983	0.768007	0.999182
DOT5	YIL010W	chrIX	+	133.41	0.389908	0.237291	1.64316	0.10035	0.688322		133.41	-0.050022	0.241665	-0.206989	0.836018	0.999182
MEC3	YLR288C	chrXII	-	24.8757	0.389389	0.483414	0.805497	0.420533	0.984362		24.8757	0.191798	0.487791	0.393196	0.694175	0.999182
RPO41	YFL036W	chrVI	+	107.019	0.388082	0.248652	1.56074	0.118585	0.737417		107.019	-0.102139	0.254551	-0.401253	0.688234	0.999182
STP4	YDL048C	chrIV	-	244.072	0.387995	0.198487	1.95476	0.0506111	0.506239		244.072	-0.141745	0.202044	-0.701556	0.482956	0.999182
SED1	YDR077W	chrIV	+	6459.69	0.387755	0.243345	1.59344	0.111062	0.71152		6459.69	0.145349	0.243388	0.59719	0.550381	0.999182
REX3	YLR107W	chrXII	+	74.588	0.387431	0.301142	1.28654	0.198256	0.880058		74.588	0.204424	0.303257	0.674096	0.500251	0.999182
DCS1	YLR270W	chrXII	+	74.3576	0.38727	0.292393	1.32449	0.185342	0.865862		74.3576	-0.242499	0.302066	-0.802802	0.422089	0.999182
MCR1	YKL150W	chrXI	+	11.0711	0.387129	0.729534	0.530653	0.595659	0.998763		11.0711	0.537933	0.721648	0.745423	0.456016	0.999182
AIM2	YAL049C	chrI	-	135.696	0.386686	0.220464	1.75396	0.079437	0.624828		135.696	0.0237455	0.224163	0.10593	0.915638	0.999182
PST2	YDR032C	chrIV	-	411.035	0.386505	0.143007	2.7027	0.00687793	0.171828		411.035	-0.0104925	0.145099	-0.0723127	0.942353	0.999182
DIG2	YDR480W	chrIV	+	23.5449	0.385997	0.516152	0.747837	0.454559	0.986476		23.5449	0.479294	0.512462	0.935278	0.349645	0.999182
SYO1	YDL063C	chrIV	-	143.857	0.385824	0.23377	1.65044	0.0988528	0.683015		143.857	0.0697875	0.236565	0.295004	0.767991	0.999182
MRPL35	YDR322W	chrIV	+	59.0019	0.384949	0.326036	1.1807	0.237723	0.915426		59.0019	-0.165129	0.335367	-0.492384	0.622448	0.999182
MIX23	YBL107C	chrII	-	83.6215	0.384906	0.283333	1.35849	0.174307	0.845726		83.6215	0.0338423	0.287829	0.117578	0.906402	0.999182
SGF29	YCL010C	chrIII	-	293.34	0.384861	0.162896	2.36261	0.0181466	0.293267		293.34	0.335781	0.16294	2.06077	0.0393254	0.61136
PLP1	YDR183W	chrIV	+	47.9154	0.38483	0.356183	1.08043	0.279952	0.951085		47.9154	0.229348	0.358426	0.639877	0.522253	0.999182
MDH2	YOL126C	chrXV	-	315.798	0.384309	0.160562	2.39353	0.0166872	0.278844		315.798	0.283623	0.160944	1.76224	0.0780284	0.815205
ARX1	YDR101C	chrIV	-	325.255	0.384021	0.159736	2.4041	0.0162124	0.275225		325.255	0.189576	0.160725	1.17951	0.238196	0.999182
UBC5	YDR059C	chrIV	-	95.5348	0.38327	0.256777	1.49262	0.135537	0.775585		95.5348	-0.202876	0.264657	-0.766561	0.443343	0.999182
BIG1	YHR101C	chrVIII	-	85.3255	0.382044	0.292302	1.30702	0.191206	0.876513		85.3255	0.406147	0.291408	1.39374	0.163396	0.978838
POA1	YBR022W	chrII	+	82.0961	0.381764	0.281841	1.35454	0.175565	0.849036		82.0961	0.491554	0.279661	1.75768	0.0788017	0.818194
SAS10	YDL153C	chrIV	-	215.61	0.381672	0.183047	2.08511	0.0370596	0.440786		215.61	0.230808	0.183973	1.25457	0.209634	0.999182
SIT1	YEL065W	chrV	+	216.622	0.381522	0.554416	0.688152	0.491357	0.996828		216.622	0.345695	0.554391	0.623558	0.532918	0.999182
OYE2	YHR179W	chrVIII	+	907.13	0.380714	0.115769	3.28857	0.00100698	0.0443151		907.13	0.0865298	0.11659	0.742174	0.457982	0.999182
JJJ3	YJR097W	chrX	+	31.2937	0.380464	0.456915	0.832681	0.405025	0.984362		31.2937	0.588621	0.451123	1.30479	0.191964	0.999182
MRPL37	YBR268W	chrII	+	129.649	0.379501	0.23305	1.62841	0.103439	0.698513		129.649	0.240463	0.234128	1.02706	0.304394	0.999182
ENT4	YLL038C	chrXII	-	249.511	0.377784	0.177198	2.13199	0.033008	0.418711		249.511	-0.255177	0.181999	-1.40208	0.160893	0.977274
IRC3	YDR332W	chrIV	+	22.3688	0.377205	0.514123	0.733685	0.463141	0.986476		22.3688	0.374153	0.512989	0.729359	0.465782	0.999182
NOC4	YPR144C	chrXVI	-	139.571	0.37712	0.224261	1.68161	0.092645	0.664188		139.571	0.437713	0.223163	1.9614	0.049832	0.678626
MAK11	YKL021C	chrXI	-	156.308	0.375318	0.212044	1.77	0.0767264	0.624828		156.308	0.272872	0.212652	1.28318	0.199428	0.999182
MRPL10	YNL284C	chrXIV	-	74.017	0.375216	0.299654	1.25216	0.210511	0.896196		74.017	0.23388	0.301163	0.776591	0.4374	0.999182
NMA111	YNL123W	chrXIV	+	193.405	0.375158	0.191736	1.95663	0.0503905	0.506239		193.405	0.247123	0.192514	1.28366	0.19926	0.999182
KXD1	YGL079W	chrVII	+	43.97	0.374933	0.368826	1.01656	0.309364	0.96639		43.97	0.247676	0.370597	0.668315	0.503932	0.999182
BZZ1	YHR114W	chrVIII	+	67.5278	0.37462	0.306715	1.22139	0.221937	0.901764		67.5278	-0.0885849	0.313843	-0.282259	0.777745	0.999182
NA	YPR015C	chrXVI	-	13.7237	0.374424	0.650587	0.575517	0.564941	0.998763		13.7237	-0.556331	0.6882	-0.808386	0.418868	0.999182
NA	YGR039W	chrVII	+	34.576	0.37433	0.414833	0.902362	0.366864	0.977915		34.576	0.227969	0.417286	0.546313	0.584851	0.999182
POM33	YLL023C	chrXII	-	147.065	0.373916	0.214138	1.74615	0.0807848	0.629265		147.065	0.0968011	0.216689	0.446728	0.655072	0.999182
SNR80	YNCE0001C	chrV	-	34.5455	0.373628	0.424567	0.880023	0.378847	0.978689		34.5455	0.413627	0.422696	0.978547	0.327804	0.999182
FAF1	YIL019W	chrIX	+	105.192	0.373517	0.249186	1.49895	0.133887	0.769566		105.192	0.348186	0.248968	1.39852	0.161958	0.977274
SLX4	YLR135W	chrXII	+	25.5316	0.373472	0.495884	0.753145	0.451363	0.986476		25.5316	0.33015	0.49591	0.665746	0.505573	0.999182
SSO2	YMR183C	chrXIII	-	211.36	0.373364	0.183361	2.03623	0.0417276	0.470768		211.36	0.343676	0.183249	1.87546	0.0607292	0.731436
RSM19	YNR037C	chrXIV	-	137.518	0.373271	0.224236	1.66463	0.0959865	0.669681		137.518	-0.163094	0.22991	-0.709383	0.478087	0.999182
ENP1	YBR247C	chrII	-	167.831	0.37271	0.214104	1.74079	0.0817203	0.631786		167.831	0.144453	0.215867	0.669176	0.503383	0.999182
YAP3	YHL009C	chrVIII	-	44.2341	0.37236	0.365478	1.01883	0.308284	0.96639		44.2341	0.0605564	0.371209	0.163133	0.870414	0.999182
ATP10	YLR393W	chrXII	+	30.9268	0.371482	0.440209	0.843876	0.398739	0.984362		30.9268	0.0362634	0.447634	0.0810112	0.935433	0.999182
PDE2	YOR360C	chrXV	-	164.603	0.371156	0.213573	1.73785	0.0822381	0.633222		164.603	0.338754	0.213474	1.58687	0.112543	0.89177
RSM23	YGL129C	chrVII	-	68.6539	0.369879	0.30035	1.23149	0.218139	0.899896		68.6539	0.151199	0.303267	0.498567	0.618084	0.999182
SLD7	YOR060C	chrXV	-	71.6092	0.369831	0.292703	1.2635	0.206408	0.891889		71.6092	-0.179645	0.301283	-0.596266	0.550998	0.999182
UGX2	YDL169C	chrIV	-	19.083	0.369562	0.557773	0.662568	0.507607	0.998763		19.083	-0.666664	0.593763	-1.12278	0.261532	0.999182
PIM1	YBL022C	chrII	-	134.605	0.369217	0.225435	1.6378	0.101463	0.690215		134.605	-0.0606641	0.229898	-0.263874	0.791877	0.999182
LSG1	YGL099W	chrVII	+	167.086	0.368039	0.203342	1.80995	0.0703042	0.594063		167.086	0.225323	0.20434	1.10269	0.270162	0.999182
MF(ALPHA)1	YPL187W	chrXVI	+	2475.66	0.368018	0.117492	3.13227	0.00173457	0.0673847		2475.66	0.312879	0.117504	2.6627	0.00775165	0.294418
PFD1	YJL179W	chrX	+	140.238	0.367992	0.217265	1.69375	0.0903133	0.655688		140.238	0.0891021	0.219929	0.405141	0.685374	0.999182
ECM31	YBR176W	chrII	+	68.6887	0.36788	0.302923	1.21444	0.224581	0.902432		68.6887	0.332906	0.302804	1.09941	0.271589	0.999182
ROG1	YGL144C	chrVII	-	40.0105	0.367838	0.393396	0.935032	0.349772	0.977915		40.0105	0.198884	0.39613	0.502067	0.615621	0.999182
TAF1	YGR274C	chrVII	-	64.0316	0.367207	0.310308	1.18337	0.236664	0.912549		64.0316	0.081042	0.314518	0.257671	0.796661	0.999182
ADA2	YDR448W	chrIV	+	21.2602	0.366989	0.539979	0.679636	0.496735	0.997087		21.2602	0.720662	0.5286	1.36334	0.172775	0.992181
UTP15	YMR093W	chrXIII	+	159.04	0.366887	0.207976	1.76409	0.0777172	0.624828		159.04	0.262434	0.208607	1.25803	0.208382	0.999182
MRS1	YIR021W	chrIX	+	41.964	0.366599	0.380497	0.963475	0.335309	0.972649		41.964	0.395495	0.379009	1.0435	0.296719	0.999182
PET20	YPL159C	chrXVI	-	85.8576	0.36594	0.289978	1.26196	0.206963	0.892937		85.8576	0.321391	0.290003	1.10824	0.26776	0.999182
NA	YDL187C	chrIV	-	23.2908	0.36594	0.528597	0.692285	0.488758	0.996033		23.2908	1.00588	0.51026	1.9713	0.0486894	0.67814
CIM1	YOR114W	chrXV	+	16.7078	0.365681	0.621956	0.587953	0.556564	0.998763		16.7078	0.273805	0.623565	0.439096	0.660592	0.999182
DBP1	YPL119C	chrXVI	-	13.1523	0.365099	0.675237	0.540698	0.588716	0.998763		13.1523	-0.11066	0.692405	-0.159819	0.873024	0.999182
DFG16	YOR030W	chrXV	+	78.9845	0.364985	0.296917	1.22925	0.218979	0.899896		78.9845	-0.157566	0.304173	-0.518014	0.604448	0.999182
SGO1	YOR073W	chrXV	+	24.69	0.364921	0.502975	0.725526	0.46813	0.987609		24.69	0.649481	0.494283	1.31399	0.188851	0.999182
RBD2	YPL246C	chrXVI	-	195.391	0.364775	0.193754	1.88267	0.0597458	0.544276		195.391	0.120703	0.195576	0.617165	0.537126	0.999182
ZNF1	YFL052W	chrVI	+	46.8168	0.364445	0.368179	0.989858	0.322244	0.972559		46.8168	-0.395779	0.383462	-1.03212	0.302015	0.999182
TDH2	YJR009C	chrX	-	2716.36	0.364318	0.127522	2.85691	0.00427787	0.12382		2716.36	0.15034	0.127689	1.17739	0.239041	0.999182
MBA1	YBR185C	chrII	-	51.2137	0.363662	0.340039	1.06947	0.284857	0.956539		51.2137	-0.147465	0.349552	-0.421869	0.673121	0.999182
YIP4	YGL198W	chrVII	+	98.5058	0.36349	0.261598	1.3895	0.164682	0.832751		98.5058	0.100449	0.264532	0.379725	0.70415	0.999182
ATO2	YNR002C	chrXIV	-	21.3827	0.363325	0.517601	0.701942	0.482716	0.992956		21.3827	-0.0282153	0.52857	-0.0533804	0.957429	0.999182
ADY3	YDL239C	chrIV	-	12.4737	0.363188	0.685104	0.530121	0.596028	0.998763		12.4737	-0.188669	0.706297	-0.267125	0.789373	0.999182
NA	YGL176C	chrVII	-	36.6177	0.362506	0.431238	0.840616	0.400563	0.984362		36.6177	-0.304636	0.445614	-0.683633	0.494207	0.999182
ATE1	YGL017W	chrVII	+	40.4988	0.362186	0.379532	0.954299	0.339932	0.974761		40.4988	-0.108925	0.389334	-0.279772	0.779652	0.999182
COQ4	YDR204W	chrIV	+	75.7901	0.361877	0.289813	1.24866	0.211791	0.896196		75.7901	-0.0156756	0.295117	-0.0531165	0.957639	0.999182
NA	YIR020C	chrIX	-	12.5426	0.361219	0.683394	0.528566	0.597107	0.998763		12.5426	-0.603909	0.724473	-0.833584	0.404515	0.999182
NA	YBR071W	chrII	+	140.726	0.361135	0.234946	1.53709	0.12427	0.752311		140.726	0.0757601	0.23747	0.31903	0.749704	0.999182
PFK27	YOL136C	chrXV	-	192.656	0.360168	0.190708	1.88859	0.0589469	0.540441		192.656	0.196246	0.191829	1.02303	0.306296	0.999182
DAM1	YGR113W	chrVII	+	26.9487	0.360141	0.47008	0.766127	0.443601	0.986476		26.9487	0.366467	0.468797	0.781718	0.43438	0.999182
CMR1	YDL156W	chrIV	+	60.6856	0.359694	0.323527	1.11179	0.266229	0.941683		60.6856	0.243712	0.324794	0.750359	0.453038	0.999182
RAD5	YLR032W	chrXII	+	49.2793	0.359543	0.362505	0.991829	0.321281	0.972559		49.2793	0.132753	0.366036	0.362678	0.716845	0.999182
MRP7	YNL005C	chrXIV	-	107.098	0.35939	0.248402	1.44681	0.147951	0.798683		107.098	0.0216676	0.252247	0.085898	0.931547	0.999182
NA	YBL100W-C	chrII	+	10.6823	0.35932	0.779528	0.460945	0.644838	0.998763		10.6823	0.415876	0.775571	0.536219	0.591807	0.999182
SNZ2	YNL333W	chrXIV	+	23.9989	0.358727	0.489507	0.732834	0.463659	0.986476		23.9989	-0.160348	0.503887	-0.318222	0.750317	0.999182
MRPS35	YGR165W	chrVII	+	68.9248	0.358566	0.304521	1.17747	0.239007	0.918341		68.9248	-0.155627	0.312492	-0.498021	0.61847	0.999182
LPL1	YOR059C	chrXV	-	75.5652	0.358452	0.285206	1.25682	0.208819	0.896108		75.5652	-0.179952	0.29338	-0.613375	0.539628	0.999182
YSF3	YNL138W-A	chrXIV	+	52.4574	0.358422	0.36476	0.982625	0.325792	0.972559		52.4574	0.468785	0.362093	1.29466	0.195439	0.999182
NFU1	YKL040C	chrXI	-	133.265	0.357886	0.226928	1.57709	0.114775	0.722363		133.265	0.381492	0.226196	1.68656	0.0916886	0.843732
ATP23	YNR020C	chrXIV	-	35.1124	0.357705	0.416717	0.858387	0.390679	0.983606		35.1124	0.306466	0.416925	0.735064	0.4623	0.999182
VCX1	YDL128W	chrIV	+	143.425	0.357671	0.218498	1.63696	0.101639	0.690592		143.425	0.2024	0.219719	0.921175	0.356959	0.999182
MIC26	YGR235C	chrVII	-	106.413	0.357397	0.252111	1.41762	0.156302	0.814377		106.413	0.234741	0.253122	0.927381	0.353729	0.999182
ERV14	YGL054C	chrVII	-	294.117	0.356931	0.173813	2.05353	0.0400208	0.458836		294.117	0.236337	0.174327	1.35571	0.175191	0.992181
MED7	YOL135C	chrXV	-	40.3029	0.356536	0.387299	0.920569	0.357275	0.977915		40.3029	0.252366	0.388641	0.649354	0.51611	0.999182
BUD21	YOR078W	chrXV	+	174.333	0.356277	0.206248	1.72742	0.0840923	0.638731		174.333	0.165883	0.207649	0.798864	0.424369	0.999182
GEP5	YLR091W	chrXII	+	27.3022	0.356113	0.459494	0.775011	0.438333	0.986092		27.3022	-0.0207878	0.468777	-0.0443448	0.96463	0.999182
MDM38	YOL027C	chrXV	-	163.197	0.355578	0.206433	1.72248	0.0849825	0.64215		163.197	0.0532682	0.209094	0.254757	0.798911	0.999182
KEG1	YFR042W	chrVI	+	42.9824	0.355558	0.377261	0.942473	0.34595	0.977915		42.9824	0.335584	0.3768	0.890618	0.373134	0.999182
BDP1	YNL039W	chrXIV	+	66.0615	0.355316	0.312814	1.13587	0.256011	0.934426		66.0615	0.225385	0.31425	0.717215	0.473242	0.999182
BUR6	YER159C	chrV	-	253.453	0.354842	0.16991	2.08841	0.036761	0.440075		253.453	0.0981157	0.171617	0.571714	0.567516	0.999182
MGP12	YDR286C	chrIV	-	30.9865	0.354813	0.443268	0.800448	0.423451	0.984362		30.9865	0.127277	0.447881	0.284176	0.776276	0.999182
MSS18	YPR134W	chrXVI	+	37.6852	0.354656	0.394998	0.897868	0.369256	0.977915		37.6852	-0.404503	0.412696	-0.980147	0.327014	0.999182
PRP31	YGR091W	chrVII	+	39.9803	0.35452	0.399239	0.88799	0.374546	0.977915		39.9803	0.162634	0.402433	0.404126	0.68612	0.999182
PLM2	YDR501W	chrIV	+	10.8228	0.354416	0.747823	0.47393	0.63555	0.998763		10.8228	0.671714	0.733108	0.916255	0.359533	0.999182
MRP20	YDR405W	chrIV	+	47.0589	0.354219	0.360648	0.982174	0.326014	0.972559		47.0589	-0.005508	0.367138	-0.0150025	0.98803	0.999182
GIP2	YER054C	chrV	-	31.0178	0.353627	0.445429	0.793904	0.427252	0.984362		31.0178	0.363688	0.444159	0.818824	0.412887	0.999182
ADH4	YGL256W	chrVII	+	65.1141	0.353309	0.331893	1.06452	0.287091	0.956539		65.1141	0.25643	0.332742	0.770657	0.44091	0.999182
KEL2	YGR238C	chrVII	-	20.5245	0.353117	0.540579	0.65322	0.513614	0.998763		20.5245	0.260541	0.542113	0.480604	0.630798	0.999182
APM2	YHL019C	chrVIII	-	26.91	0.35311	0.472808	0.746837	0.455162	0.986476		26.91	-0.0820217	0.483612	-0.169602	0.865323	0.999182
RRD1	YIL153W	chrIX	+	87.0157	0.35275	0.277999	1.26889	0.20448	0.888929		87.0157	-0.0173242	0.282709	-0.0612792	0.951137	0.999182
UBP10	YNL186W	chrXIV	+	202.035	0.352454	0.189261	1.86226	0.0625664	0.558682		202.035	0.374165	0.188697	1.98289	0.0473798	0.669535
NA	YCL042W	chrIII	+	362.182	0.352166	0.146635	2.40165	0.0163215	0.276258		362.182	-0.545362	0.152739	-3.57055	0.000356234	0.0399611
MTR10	YOR160W	chrXV	+	65.5346	0.350243	0.304424	1.15051	0.249933	0.928955		65.5346	0.125279	0.307559	0.407334	0.683762	0.999182
GPI16	YHR188C	chrVIII	-	141.94	0.350188	0.219317	1.59672	0.110328	0.71051		141.94	0.105794	0.221541	0.477534	0.632982	0.999182
SRD1	YCR018C	chrIII	-	118.824	0.349895	0.248153	1.41	0.15854	0.818647		118.824	0.0827563	0.250775	0.330002	0.741399	0.999182
REC104	YHR157W	chrVIII	+	19.0335	0.349358	0.554107	0.630488	0.528375	0.998763		19.0335	0.320008	0.553701	0.577944	0.563302	0.999182
SLY41	YOR307C	chrXV	-	71.4873	0.349147	0.299829	1.16448	0.244228	0.922263		71.4873	0.392087	0.298498	1.31354	0.189003	0.999182
ERB1	YMR049C	chrXIII	-	253.197	0.347298	0.173317	2.00382	0.0450889	0.486705		253.197	0.388369	0.172677	2.24911	0.0245056	0.509805
FMP30	YPL103C	chrXVI	-	36.8288	0.347099	0.412392	0.841673	0.399971	0.984362		36.8288	0.196608	0.414814	0.473967	0.635523	0.999182
KRE1	YNL322C	chrXIV	-	286.708	0.346298	0.191539	1.80797	0.0706105	0.594063		286.708	0.307909	0.191508	1.60781	0.107877	0.880786
PRK1	YIL095W	chrIX	+	38.2466	0.346291	0.400338	0.864997	0.38704	0.980613		38.2466	0.280913	0.400848	0.700797	0.48343	0.999182
RCL1	YOL010W	chrXV	+	162.469	0.346132	0.206603	1.67535	0.0938663	0.666264		162.469	0.0780926	0.208917	0.373797	0.708555	0.999182
MAP1	YLR244C	chrXII	-	283.725	0.345819	0.165584	2.08848	0.0367543	0.440075		283.725	0.264701	0.165859	1.59594	0.110502	0.885618
PUF3	YLL013C	chrXII	-	90.2062	0.345276	0.263927	1.30823	0.190797	0.876005		90.2062	0.257614	0.264571	0.973706	0.330203	0.999182
PIC2	YER053C	chrV	-	152.233	0.345004	0.400963	0.860437	0.389548	0.982565		152.233	-0.855171	0.408789	-2.09196	0.0364418	0.586847
RAD9	YDR217C	chrIV	-	53.6392	0.344751	0.333698	1.03312	0.301547	0.965577		53.6392	0.00814051	0.339404	0.0239848	0.980865	0.999182
ALO1	YML086C	chrXIII	-	181.849	0.344422	0.195508	1.76168	0.0781238	0.624828		181.849	-0.029267	0.198757	-0.14725	0.882935	0.999182
LST7	YGR057C	chrVII	-	43.061	0.344401	0.374578	0.919437	0.357867	0.977915		43.061	0.250791	0.375657	0.667606	0.504385	0.999182
NA	YOL162W	chrXV	+	7.44574	0.344033	0.879724	0.391069	0.695746	0.998763		7.44574	0.311275	0.879248	0.354024	0.723321	0.999182
CTK3	YML112W	chrXIII	+	37.7369	0.343976	0.396325	0.867913	0.385442	0.979867		37.7369	-0.0319378	0.404105	-0.0790333	0.937006	0.999182
YHC3	YJL059W	chrX	+	20.5214	0.343814	0.539663	0.637091	0.524066	0.998763		20.5214	0.261637	0.540888	0.483718	0.628586	0.999182
NA	YER134C	chrV	-	100.704	0.343342	0.264324	1.29894	0.193963	0.879161		100.704	0.232864	0.265188	0.878112	0.379883	0.999182
PEX27	YOR193W	chrXV	+	81.5839	0.343133	0.284353	1.20671	0.227543	0.905636		81.5839	-0.16453	0.291466	-0.564489	0.572421	0.999182
SPI1	YER150W	chrV	+	59.474	0.341684	0.313668	1.08932	0.276014	0.946264		59.474	-0.75266	0.335785	-2.2415	0.024994	0.518082
ECM16	YMR128W	chrXIII	+	183.262	0.341566	0.204181	1.67286	0.0943542	0.66807		183.262	0.179047	0.205271	0.872248	0.383073	0.999182
SDH5	YOL071W	chrXV	+	94.2343	0.341319	0.257925	1.32333	0.185726	0.86643		94.2343	-0.211507	0.265422	-0.796868	0.425527	0.999182
ISC10	YER180C	chrV	-	36.0581	0.340934	0.428975	0.794764	0.426751	0.984362		36.0581	0.181389	0.431556	0.420314	0.674256	0.999182
HBS1	YKR084C	chrXI	-	107.912	0.3405	0.246251	1.38274	0.166745	0.835705		107.912	0.331141	0.245832	1.34702	0.177972	0.994245
NA	YGR011W	chrVII	+	40.6709	0.340169	0.380381	0.894284	0.37117	0.977915		40.6709	0.0647198	0.385581	0.16785	0.866701	0.999182
GOR1	YNL274C	chrXIV	-	28.8631	0.339368	0.439138	0.772804	0.439639	0.986301		28.8631	-0.674415	0.468698	-1.43891	0.150175	0.968232
GBP2	YCL011C	chrIII	-	314.987	0.33911	0.158069	2.14532	0.031927	0.410459		314.987	0.308307	0.157987	1.95146	0.0510018	0.684933
SDS24	YBR214W	chrII	+	95.1904	0.338846	0.255867	1.32431	0.185401	0.865862		95.1904	-0.386944	0.266167	-1.45376	0.146012	0.959851
PCF11	YDR228C	chrIV	-	50.883	0.338591	0.348833	0.970639	0.331728	0.972559		50.883	0.302678	0.348712	0.867988	0.385401	0.999182
PXR1	YGR280C	chrVII	-	209.725	0.338576	0.190384	1.77838	0.0753413	0.621974		209.725	0.278683	0.190529	1.46268	0.143555	0.954975
TIM13	YGR181W	chrVII	+	204.63	0.338549	0.192165	1.76176	0.0781097	0.624828		204.63	0.302258	0.192109	1.57337	0.115634	0.893647
EAF6	YJR082C	chrX	-	142.471	0.33853	0.230676	1.46756	0.142224	0.790553		142.471	0.132467	0.23238	0.570045	0.568647	0.999182
YPT10	YBR264C	chrII	-	42.2535	0.338038	0.398793	0.847653	0.396631	0.984362		42.2535	0.72136	0.390417	1.84767	0.0646507	0.753061
PUF2	YPR042C	chrXVI	-	43.071	0.337886	0.380557	0.887872	0.37461	0.977915		43.071	0.0773709	0.385152	0.200884	0.840789	0.999182
NA	YJL077W-A	chrX	+	79.1422	0.33778	0.28883	1.16948	0.242212	0.921339		79.1422	0.451752	0.286543	1.57656	0.114897	0.893647
HOR7	YMR251W-A	chrXIII	+	1835.1	0.337632	0.0986046	3.4241	0.000616838	0.0315083		1835.1	-0.491844	0.100254	-4.906	9.3e-07	0.000443151
ARG2	YJL071W	chrX	+	42.4827	0.33678	0.398199	0.845758	0.397688	0.984362		42.4827	0.223198	0.399623	0.558521	0.576489	0.999182
UBP7	YIL156W	chrIX	+	45.6349	0.336284	0.3694	0.910352	0.362637	0.977915		45.6349	0.192312	0.371455	0.517728	0.604648	0.999182
MPP6	YNR024W	chrXIV	+	90.4271	0.336068	0.268406	1.25209	0.210538	0.896196		90.4271	0.118653	0.270882	0.438026	0.661368	0.999182
NA	YNL303W	chrXIV	+	18.0042	0.335611	0.607993	0.551999	0.580949	0.998763		18.0042	0.60431	0.598565	1.0096	0.312688	0.999182
NA	YGL185C	chrVII	-	44.7649	0.335103	0.364654	0.918961	0.358116	0.977915		44.7649	0.20949	0.366393	0.571764	0.567482	0.999182
PRY2	YKR013W	chrXI	+	442.547	0.335002	0.16355	2.04832	0.0405289	0.463694		442.547	0.330749	0.163366	2.02459	0.0429096	0.640955
GPI8	YDR331W	chrIV	+	95.2786	0.334978	0.267939	1.2502	0.211226	0.896196		95.2786	0.52695	0.264877	1.98941	0.0466555	0.665519
TAD2	YJL035C	chrX	-	38.8228	0.334871	0.422469	0.792654	0.427979	0.984362		38.8228	0.510749	0.418023	1.22182	0.221776	0.999182
PFA3	YNL326C	chrXIV	-	52.6028	0.334602	0.343722	0.973467	0.330321	0.972559		52.6028	0.305239	0.343481	0.888663	0.374184	0.999182
PAM18	YLR008C	chrXII	-	137.22	0.334333	0.240485	1.39025	0.164454	0.832751		137.22	0.25083	0.240903	1.04121	0.297778	0.999182
MFG1	YDL233W	chrIV	+	57.4773	0.33408	0.328876	1.01583	0.309713	0.96639		57.4773	0.0746707	0.332833	0.224349	0.822486	0.999182
SNR47	YNCD0010C	chrIV	-	72.1771	0.333986	0.319172	1.04642	0.295369	0.960253		72.1771	0.74913	0.312597	2.39647	0.0165538	0.414485
CBP3	YPL215W	chrXVI	+	86.0513	0.33398	0.270716	1.23369	0.217318	0.899896		86.0513	0.199748	0.27206	0.734205	0.462824	0.999182
SHQ1	YIL104C	chrIX	-	59.713	0.333133	0.329683	1.01046	0.312274	0.969444		59.713	0.10933	0.332854	0.328461	0.742563	0.999182
CTI6	YPL181W	chrXVI	+	97.1656	0.333041	0.271596	1.22623	0.22011	0.90079		97.1656	0.0663766	0.274526	0.241787	0.808946	0.999182
CMP2	YML057W	chrXIII	+	119.313	0.332653	0.232719	1.42942	0.152884	0.806592		119.313	0.0977753	0.235103	0.415883	0.677495	0.999182
RIB7	YBR153W	chrII	+	54.3801	0.332583	0.334854	0.993219	0.320603	0.972559		54.3801	0.309327	0.334503	0.924736	0.355103	0.999182
SSE2	YBR169C	chrII	-	61.0715	0.332299	0.317697	1.04596	0.295579	0.960253		61.0715	-0.107884	0.324922	-0.332031	0.739866	0.999182
STE50	YCL032W	chrIII	+	45.862	0.332248	0.357842	0.928477	0.35316	0.977915		45.862	-0.237908	0.369379	-0.644076	0.519526	0.999182
GCR2	YNL199C	chrXIV	-	70.0069	0.332246	0.302145	1.09962	0.271496	0.941683		70.0069	0.357714	0.301068	1.18815	0.234773	0.999182
PEF1	YGR058W	chrVII	+	35.1984	0.331768	0.415666	0.798161	0.424777	0.984362		35.1984	-0.247017	0.428857	-0.575988	0.564623	0.999182
NA	YFL051C	chrVI	-	8.16594	0.331226	0.848664	0.390291	0.696321	0.998763		8.16594	0.367256	0.844868	0.434691	0.663787	0.999182
PDP3	YLR455W	chrXII	+	40.2486	0.330975	0.421653	0.784945	0.432486	0.984362		40.2486	0.5641	0.416263	1.35515	0.175369	0.992181
HLR1	YDR528W	chrIV	+	23.142	0.330442	0.506456	0.652459	0.514105	0.998763		23.142	0.359776	0.504407	0.713265	0.475682	0.999182
AFG1	YEL052W	chrV	+	77.1588	0.33042	0.288947	1.14353	0.252819	0.931996		77.1588	0.0464113	0.292699	0.158563	0.874013	0.999182
EMA35	YCR100C	chrIII	-	31.0905	0.330354	0.437559	0.754994	0.450253	0.986476		31.0905	-0.0703016	0.446801	-0.157344	0.874973	0.999182
NA	YJR084W	chrX	+	47.414	0.330057	0.357581	0.923029	0.355992	0.977915		47.414	-0.155153	0.36684	-0.422944	0.672336	0.999182
TIM9	YEL020W-A	chrV	+	1171.26	0.329893	0.114493	2.88134	0.00395992	0.116178		1171.26	0.142445	0.11486	1.24015	0.214919	0.999182
VTS1	YOR359W	chrXV	+	105.321	0.32979	0.248544	1.32689	0.184545	0.865862		105.321	0.213501	0.249504	0.855699	0.392164	0.999182
SDH7	YDR511W	chrIV	+	117.884	0.329637	0.233791	1.40997	0.158549	0.818647		117.884	0.205047	0.234807	0.873258	0.382522	0.999182
PET112	YBL080C	chrII	-	12.7186	0.329372	0.676058	0.487195	0.62612	0.998763		12.7186	-0.445028	0.707558	-0.628964	0.529373	0.999182
TIM8	YJR135W-A	chrX	+	242.654	0.329035	0.180227	1.82567	0.0678997	0.578918		242.654	0.106054	0.181644	0.583858	0.559316	0.999182
CST9	YLR394W	chrXII	+	35.0391	0.328927	0.413873	0.794754	0.426757	0.984362		35.0391	-0.011078	0.421022	-0.0263121	0.979008	0.999182
NCE101	YJL205C	chrX	-	102.565	0.328509	0.265616	1.23678	0.216169	0.899896		102.565	0.232433	0.266283	0.872879	0.382729	0.999182
SPP1	YPL138C	chrXVI	-	40.3556	0.328316	0.395795	0.829511	0.406815	0.984362		40.3556	0.208624	0.397445	0.524913	0.599644	0.999182
YNG1	YOR064C	chrXV	-	30.9855	0.328126	0.442695	0.741202	0.458571	0.986476		30.9855	0.250089	0.44358	0.563797	0.572892	0.999182
RPC53	YDL150W	chrIV	+	142.214	0.327996	0.22397	1.46446	0.143068	0.791577		142.214	0.130815	0.225636	0.579759	0.562077	0.999182
CLB6	YGR109C	chrVII	-	7.6316	0.327891	0.857243	0.382495	0.702094	0.998763		7.6316	0.109635	0.866497	0.126526	0.899315	0.999182
MRC1	YCL061C	chrIII	-	31.3213	0.327573	0.436183	0.751	0.452653	0.986476		31.3213	0.127701	0.440148	0.290131	0.771716	0.999182
TUM1	YOR251C	chrXV	-	110.256	0.327272	0.240633	1.36005	0.173814	0.845716		110.256	0.218717	0.241481	0.905728	0.36508	0.999182
MRPL23	YOR150W	chrXV	+	84.0891	0.32687	0.290287	1.12602	0.260157	0.938434		84.0891	0.0414896	0.293735	0.141248	0.887674	0.999182
UBS1	YBR165W	chrII	+	46.8797	0.32668	0.356961	0.915172	0.360101	0.977915		46.8797	0.153261	0.359646	0.426145	0.670002	0.999182
RBA50	YDR527W	chrIV	+	114.265	0.326564	0.242005	1.34941	0.177206	0.853291		114.265	0.235369	0.242604	0.970178	0.331958	0.999182
JAC1	YGL018C	chrVII	-	31.1998	0.326471	0.446732	0.730799	0.464902	0.986476		31.1998	0.364566	0.444795	0.819627	0.412429	0.999182
PGK1	YCR012W	chrIII	+	8320.53	0.326429	0.106714	3.05891	0.00222145	0.0814676		8320.53	-0.0385236	0.106841	-0.360568	0.718423	0.999182
SKI6	YGR195W	chrVII	+	125.955	0.325326	0.228248	1.42532	0.154066	0.807891		125.955	-0.0469142	0.232262	-0.201988	0.839926	0.999182
PCL10	YGL134W	chrVII	+	31.0931	0.325206	0.459943	0.707057	0.479531	0.991598		31.0931	-0.0731223	0.468688	-0.156015	0.876021	0.999182
RKM2	YDR198C	chrIV	-	51.9533	0.324323	0.348556	0.930475	0.352125	0.977915		51.9533	0.38937	0.346563	1.12352	0.261217	0.999182
PSF1	YDR013W	chrIV	+	56.9719	0.324242	0.339459	0.955175	0.339489	0.974761		56.9719	0.293391	0.339256	0.864807	0.387145	0.999182
SPE2	YOL052C	chrXV	-	94.5736	0.323596	0.263926	1.22609	0.220166	0.90079		94.5736	0.0167278	0.267608	0.0625087	0.950158	0.999182
SWS2	YNL081C	chrXIV	-	139.063	0.323285	0.221456	1.45982	0.144341	0.793251		139.063	-0.015038	0.224806	-0.0668932	0.946667	0.999182
PEP4	YPL154C	chrXVI	-	671.883	0.322718	0.122656	2.63108	0.00851147	0.189471		671.883	-0.188	0.124689	-1.50775	0.131619	0.939303
TRM7	YBR061C	chrII	-	112.301	0.32213	0.244035	1.32001	0.18683	0.86871		112.301	0.101198	0.246279	0.410906	0.681141	0.999182
NA	YOL107W	chrXV	+	27.8183	0.322027	0.451644	0.713011	0.475839	0.990992		27.8183	-0.250045	0.466784	-0.535676	0.592183	0.999182
RDS1	YCR106W	chrIII	+	33.4059	0.321975	0.43228	0.744829	0.456375	0.986476		33.4059	0.118831	0.436109	0.27248	0.785253	0.999182
PSY3	YLR376C	chrXII	-	25.5752	0.321944	0.495427	0.649832	0.515801	0.998763		25.5752	0.216843	0.497111	0.436207	0.662687	0.999182
MSF1	YPR047W	chrXVI	+	34.5653	0.321908	0.429064	0.750257	0.4531	0.986476		34.5653	-0.435112	0.446907	-0.973606	0.330252	0.999182
SAY1	YGR263C	chrVII	-	32.7153	0.320698	0.432894	0.740823	0.458801	0.986476		32.7153	0.0998661	0.437244	0.228399	0.819336	0.999182
YAE1	YJR067C	chrX	-	102.834	0.320507	0.251499	1.27438	0.202527	0.886856		102.834	0.281337	0.251457	1.11883	0.263214	0.999182
MKS1	YNL076W	chrXIV	+	59.6047	0.32026	0.327905	0.976686	0.328724	0.972559		59.6047	0.19347	0.329379	0.587379	0.556949	0.999182
MSP1	YGR028W	chrVII	+	57.5689	0.31866	0.323535	0.984933	0.324657	0.972559		57.5689	-0.0720607	0.330103	-0.218298	0.827197	0.999182
COQ9	YLR201C	chrXII	-	63.2898	0.318448	0.312813	1.01801	0.308671	0.96639		63.2898	0.267183	0.312967	0.853709	0.393267	0.999182
MRPL11	YDL202W	chrIV	+	205.619	0.31803	0.190325	1.67098	0.0947252	0.668822		205.619	0.22915	0.190726	1.20146	0.229572	0.999182
PLC1	YPL268W	chrXVI	+	40.2688	0.317525	0.391475	0.811099	0.417309	0.984362		40.2688	-0.125647	0.400452	-0.313762	0.753702	0.999182
MRX18	YBR056W	chrII	+	48.5953	0.316967	0.352845	0.898317	0.369016	0.977915		48.5953	-0.136926	0.361352	-0.378927	0.704742	0.999182
UTP14	YML093W	chrXIII	+	153.868	0.316917	0.208103	1.52288	0.127788	0.752311		153.868	0.0582367	0.21044	0.276738	0.781982	0.999182
AIT1	YDL180W	chrIV	+	40.7792	0.316883	0.386131	0.820662	0.411839	0.984362		40.7792	-0.00910015	0.392409	-0.0231905	0.981498	0.999182
TPS3	YMR261C	chrXIII	-	77.1976	0.316729	0.302486	1.04708	0.295061	0.960253		77.1976	-0.589858	0.316636	-1.86289	0.0624779	0.742129
NYV1	YLR093C	chrXII	-	164.835	0.316666	0.208017	1.52231	0.127933	0.752311		164.835	0.0161373	0.210632	0.0766135	0.938931	0.999182
AIM32	YML050W	chrXIII	+	19.4877	0.316538	0.537467	0.588944	0.555899	0.998763		19.4877	-0.737183	0.575169	-1.28168	0.199955	0.999182
UME6	YDR207C	chrIV	-	38.3379	0.315857	0.409755	0.770844	0.440799	0.986476		38.3379	0.42525	0.406506	1.04611	0.29551	0.999182
PRP22	YER013W	chrV	+	43.3835	0.315684	0.374186	0.843656	0.398861	0.984362		43.3835	0.0948896	0.377974	0.251048	0.801777	0.999182
HOS1	YPR068C	chrXVI	-	18.3003	0.315578	0.563757	0.559777	0.575631	0.998763		18.3003	0.0469916	0.571364	0.0822446	0.934452	0.999182
JLP2	YMR132C	chrXIII	-	192.731	0.31535	0.200686	1.57136	0.1161	0.728296		192.731	0.0890743	0.202325	0.440253	0.659754	0.999182
PCK1	YKR097W	chrXI	+	101.637	0.314673	0.283976	1.1081	0.267819	0.941683		101.637	-0.205573	0.289913	-0.709087	0.478271	0.999182
LIA1	YJR070C	chrX	-	524.697	0.31419	0.141612	2.21867	0.0265094	0.367789		524.697	0.351684	0.141245	2.48989	0.0127782	0.361388
FMP32	YFL046W	chrVI	+	72.8504	0.314142	0.300318	1.04603	0.295547	0.960253		72.8504	0.132169	0.302512	0.436905	0.662181	0.999182
CDC123	YLR215C	chrXII	-	39.4779	0.314119	0.410082	0.765991	0.443682	0.986476		39.4779	0.504596	0.405277	1.24507	0.213107	0.999182
HBT1	YDL223C	chrIV	-	43.1373	0.313918	0.392565	0.799659	0.423908	0.984362		43.1373	-0.0971823	0.400249	-0.242804	0.808157	0.999182
NTH1	YDR001C	chrIV	-	213.592	0.312769	0.182385	1.71488	0.0863663	0.645079		213.592	-0.403342	0.188779	-2.13659	0.0326317	0.573167
MRPL3	YMR024W	chrXIII	+	91.4654	0.312471	0.261152	1.19651	0.231498	0.907123		91.4654	-0.309937	0.269974	-1.14803	0.250958	0.999182
UBP3	YER151C	chrV	-	120.779	0.312442	0.234615	1.33172	0.182952	0.863589		120.779	0.342811	0.233748	1.46659	0.142489	0.954975
SNR73	YNCM0016W	chrXIII	+	89.6879	0.312432	0.271289	1.15166	0.249461	0.928955		89.6879	0.231097	0.271834	0.850142	0.395246	0.999182
EMP65	YER140W	chrV	+	97.9394	0.312246	0.279388	1.11761	0.263735	0.94033		97.9394	0.0772431	0.281821	0.274085	0.784019	0.999182
MIN4	YML007C-A	chrXIII	-	77.843	0.312212	0.299391	1.04282	0.29703	0.962782		77.843	0.503804	0.296027	1.70188	0.0887777	0.840766
RAD1	YPL022W	chrXVI	+	67.1095	0.312186	0.305246	1.02274	0.306432	0.96639		67.1095	-0.014726	0.310088	-0.0474897	0.962123	0.999182
CUE2	YKL090W	chrXI	+	42.7513	0.311915	0.384012	0.812252	0.416647	0.984362		42.7513	0.349382	0.382371	0.913725	0.360861	0.999182
HSK3	YKL138C-A	chrXI	-	152.08	0.311649	0.212223	1.4685	0.141969	0.790553		152.08	0.439096	0.210455	2.08642	0.0369409	0.587053
HCH1	YNL281W	chrXIV	+	554.67	0.311631	0.138895	2.24365	0.0248551	0.353828		554.67	-0.172565	0.140944	-1.22435	0.220822	0.999182
SNR48	YNCG0026W	chrVII	+	36.0456	0.311623	0.455751	0.683757	0.494129	0.997087		36.0456	0.867303	0.443623	1.95504	0.0505779	0.680837
VPS28	YPL065W	chrXVI	+	33.9873	0.311295	0.434311	0.716758	0.473524	0.990589		33.9873	0.0124956	0.440362	0.0283758	0.977362	0.999182
APC9	YLR102C	chrXII	-	28.3369	0.311226	0.486394	0.639864	0.522261	0.998763		28.3369	-0.0477609	0.494428	-0.0965983	0.923045	0.999182
NA	YIL030W-A	chrIX	+	45.232	0.311159	0.365434	0.851478	0.394504	0.983851		45.232	0.222858	0.366385	0.608261	0.543015	0.999182
ISA1	YLL027W	chrXII	+	176.119	0.310503	0.205921	1.50787	0.131588	0.761187		176.119	0.209568	0.206469	1.01501	0.310102	0.999182
RGA2	YDR379W	chrIV	+	51.5251	0.309688	0.342275	0.904793	0.365575	0.977915		51.5251	-0.0797939	0.349196	-0.228508	0.819252	0.999182
HMX1	YLR205C	chrXII	-	195.691	0.309198	0.367985	0.840248	0.40077	0.984362		195.691	-0.254195	0.370612	-0.68588	0.492788	0.999182
YRB30	YGL164C	chrVII	-	45.239	0.309049	0.364317	0.848297	0.396273	0.984362		45.239	-0.275988	0.376222	-0.733578	0.463206	0.999182
CEF1	YMR213W	chrXIII	+	30.2759	0.308834	0.440295	0.701424	0.483038	0.992979		30.2759	-0.337477	0.456826	-0.738742	0.460064	0.999182
NA	YDL016C	chrIV	-	226.609	0.308412	0.191974	1.60653	0.108157	0.708306		226.609	0.216444	0.192358	1.12521	0.260499	0.999182
URE2	YNL229C	chrXIV	-	153.573	0.307983	0.212284	1.4508	0.146835	0.797003		153.573	0.0853675	0.214192	0.398556	0.69022	0.999182
QRI7	YDL104C	chrIV	-	20.0376	0.307139	0.55421	0.554193	0.579447	0.998763		20.0376	0.236296	0.555086	0.425693	0.670332	0.999182
POP2	YNR052C	chrXIV	-	95.0479	0.307018	0.27807	1.1041	0.269548	0.941683		95.0479	0.113604	0.280036	0.405676	0.68498	0.999182
NA	YIL100W	chrIX	+	14.9576	0.306402	0.638494	0.479881	0.631312	0.998763		14.9576	0.0621977	0.645791	0.0963125	0.923272	0.999182
NMA2	YGR010W	chrVII	+	40.8393	0.306326	0.38052	0.805018	0.420809	0.984362		40.8393	0.0642333	0.384972	0.166852	0.867487	0.999182
TRM44	YPL030W	chrXVI	+	73.6841	0.306145	0.293801	1.04202	0.297404	0.963223		73.6841	0.507673	0.290031	1.75041	0.0800475	0.820939
CTK2	YJL006C	chrX	-	46.2639	0.305798	0.377066	0.810993	0.41737	0.984362		46.2639	0.11979	0.379895	0.315325	0.752515	0.999182
PPG1	YNR032W	chrXIV	+	50.1334	0.305711	0.348321	0.877671	0.380122	0.978689		50.1334	0.214703	0.349274	0.614713	0.538744	0.999182
PRE8	YML092C	chrXIII	-	314.695	0.305495	0.158832	1.92338	0.0544323	0.523424		314.695	0.0157686	0.160553	0.0982138	0.921763	0.999182
NA	YLR152C	chrXII	-	37.3155	0.304865	0.401665	0.759005	0.44785	0.986476		37.3155	-0.0953238	0.41007	-0.232457	0.816183	0.999182
DUS1	YML080W	chrXIII	+	56.8329	0.304573	0.330607	0.921255	0.356917	0.977915		56.8329	0.381387	0.328469	1.16111	0.245599	0.999182
YRR1	YOR162C	chrXV	-	26.6967	0.304344	0.464521	0.655179	0.512353	0.998763		26.6967	-0.0476524	0.473273	-0.100687	0.919799	0.999182
NA	YHR138C	chrVIII	-	109.995	0.304304	0.246662	1.23369	0.217319	0.899896		109.995	-0.493925	0.257122	-1.92098	0.0547348	0.7082
ESF2	YNR054C	chrXIV	-	196.343	0.30411	0.198301	1.53358	0.125134	0.752311		196.343	0.200692	0.198833	1.00935	0.312805	0.999182
EXO1	YOR033C	chrXV	-	52.0809	0.303684	0.356503	0.851842	0.394302	0.983851		52.0809	0.128001	0.358969	0.356581	0.721406	0.999182
NUP170	YBL079W	chrII	+	126.431	0.30351	0.231297	1.31221	0.189451	0.872663		126.431	0.260704	0.231301	1.12712	0.259691	0.999182
CTH1	YDR151C	chrIV	-	77.8292	0.303467	0.286855	1.05791	0.290096	0.956539		77.8292	0.220525	0.287475	0.767108	0.443017	0.999182
SGV1	YPR161C	chrXVI	-	84.2335	0.303015	0.274242	1.10492	0.269195	0.941683		84.2335	0.063667	0.277196	0.229682	0.818339	0.999182
SNR77	YNCM0012W	chrXIII	+	225.954	0.302484	0.205504	1.47192	0.141043	0.790504		225.954	0.171764	0.206149	0.833202	0.404731	0.999182
PDX1	YGR193C	chrVII	-	24153	0.302315	0.0991454	3.0492	0.00229449	0.0826874		24153	0.14735	0.0991612	1.48596	0.137289	0.947263
CDC45	YLR103C	chrXII	-	25.6636	0.302229	0.483117	0.625583	0.531589	0.998763		25.6636	0.122352	0.486944	0.251264	0.80161	0.999182
NOP2	YNL061W	chrXIV	+	381.175	0.302116	0.147552	2.04752	0.0406066	0.463694		381.175	0.136855	0.148299	0.922829	0.356097	0.999182
BYE1	YKL005C	chrXI	-	49.4965	0.302088	0.345572	0.874167	0.382027	0.979867		49.4965	0.0234593	0.35038	0.0669539	0.946618	0.999182
KAP95	YLR347C	chrXII	-	98.58	0.301975	0.256605	1.17681	0.239272	0.918707		98.58	0.499159	0.25343	1.96961	0.048883	0.678213
RPF2	YKR081C	chrXI	-	356.668	0.301836	0.149953	2.01287	0.0441279	0.483098		356.668	0.297503	0.149708	1.98722	0.046898	0.665766
MXR2	YCL033C	chrIII	-	155.355	0.301817	0.210196	1.43588	0.151036	0.804708		155.355	-0.212814	0.215384	-0.988068	0.323119	0.999182
ECM7	YLR443W	chrXII	+	89.5412	0.301058	0.265369	1.13449	0.256589	0.934426		89.5412	0.191813	0.266333	0.7202	0.471402	0.999182
FEX2	YPL279C	chrXVI	-	18.0421	0.300847	0.605722	0.496676	0.619418	0.998763		18.0421	1.11646	0.579326	1.92717	0.0539578	0.7082
SQT1	YIR012W	chrIX	+	336.796	0.300748	0.162972	1.8454	0.0649798	0.567556		336.796	0.194838	0.163364	1.19266	0.233001	0.999182
NA	YGR122C-A	chrVII	-	17.0812	0.29985	0.576954	0.519712	0.603264	0.998763		17.0812	-0.42326	0.602484	-0.702525	0.482352	0.999182
VPS71	YML041C	chrXIII	-	36.3457	0.299607	0.408791	0.73291	0.463613	0.986476		36.3457	0.0480446	0.413671	0.116142	0.90754	0.999182
TMH11	YJR085C	chrX	-	333.456	0.299434	0.154682	1.93581	0.0528913	0.519025		333.456	0.0340844	0.156183	0.218234	0.827247	0.999182
SNR46	YNCG0024W	chrVII	+	37.381	0.298966	0.406611	0.735264	0.462179	0.986476		37.381	0.601752	0.399031	1.50803	0.131546	0.939303
MIC12	YBR262C	chrII	-	138.313	0.298799	0.218187	1.36946	0.170855	0.841776		138.313	-0.173048	0.223263	-0.775085	0.43829	0.999182
FMP25	YLR077W	chrXII	+	70.8743	0.29877	0.310116	0.963414	0.33534	0.972649		70.8743	0.441699	0.307281	1.43745	0.150591	0.968232
VPS4	YPR173C	chrXVI	-	147.715	0.298563	0.215586	1.38489	0.166086	0.835605		147.715	0.0603952	0.217714	0.277406	0.781468	0.999182
ACP1	YKL192C	chrXI	-	491.555	0.298482	0.145294	2.05432	0.0399444	0.458836		491.555	0.0258981	0.146413	0.176883	0.8596	0.999182
RAD50	YNL250W	chrXIV	+	34.0211	0.298193	0.418932	0.711794	0.476592	0.990992		34.0211	-0.375949	0.435233	-0.863786	0.387705	0.999182
NA	YPR170C	chrXVI	-	5.83194	0.29791	0.975704	0.305328	0.760116	0.998763		5.83194	0.00908647	0.99083	0.00917057	0.992683	0.999182
PXP1	YEL020C	chrV	-	22.4212	0.297768	0.513736	0.579612	0.562176	0.998763		22.4212	-0.164792	0.526696	-0.31288	0.754372	0.999182
PEX13	YLR191W	chrXII	+	41.9072	0.297377	0.408777	0.727481	0.466931	0.987067		41.9072	0.187222	0.410128	0.456495	0.648034	0.999182
SIF2	YBR103W	chrII	+	36.6583	0.29699	0.411032	0.722548	0.469958	0.989477		36.6583	0.346634	0.408972	0.847575	0.396675	0.999182
TFC7	YOR110W	chrXV	+	50.9382	0.296522	0.348724	0.850307	0.395155	0.984188		50.9382	-0.0203578	0.354124	-0.0574878	0.954157	0.999182
NA	YHR130C	chrVIII	-	48.9447	0.296367	0.373978	0.792471	0.428086	0.984362		48.9447	-0.0961048	0.380724	-0.252426	0.800712	0.999182
SSF2	YDR312W	chrIV	+	84.2087	0.295952	0.275867	1.0728	0.283359	0.9564		84.2087	0.32228	0.274867	1.1725	0.240998	0.999182
MRPL32	YCR003W	chrIII	+	75.2071	0.295711	0.292437	1.0112	0.311923	0.969316		75.2071	-0.0221643	0.29682	-0.0746726	0.940475	0.999182
TMC1	YOR052C	chrXV	-	380.262	0.295655	0.147447	2.00516	0.0449463	0.486083		380.262	-0.099957	0.149674	-0.667833	0.50424	0.999182
MRN1	YPL184C	chrXVI	-	146.942	0.295602	0.233946	1.26355	0.206392	0.891889		146.942	-0.0209731	0.236733	-0.0885941	0.929404	0.999182
PEP12	YOR036W	chrXV	+	82.3278	0.295562	0.271244	1.08965	0.275866	0.946264		82.3278	-0.622103	0.286268	-2.17315	0.029769	0.558389
FZF1	YGL254W	chrVII	+	542.962	0.295559	0.159052	1.85826	0.0631324	0.559103		542.962	0.477287	0.158176	3.01744	0.00254923	0.154321
NA	YMR106W-A	chrXIII	+	63.1927	0.29551	0.317245	0.931489	0.3516	0.977915		63.1927	-0.0308709	0.322214	-0.0958088	0.923672	0.999182
STE2	YFL026W	chrVI	+	11.637	0.295354	0.702293	0.420557	0.674078	0.998763		11.637	0.197366	0.704637	0.280096	0.779404	0.999182
SLO1	YER180C-A	chrV	-	33.7276	0.295317	0.440789	0.669973	0.502875	0.998763		33.7276	0.147212	0.443234	0.332131	0.73979	0.999182
RRP7	YCL031C	chrIII	-	165.623	0.294775	0.202648	1.45462	0.145776	0.794125		165.623	0.223779	0.202938	1.1027	0.270158	0.999182
ADE1	YAR015W	chrI	+	592.295	0.294723	0.151566	1.94452	0.0518324	0.512147		592.295	0.375761	0.151096	2.48689	0.0128864	0.361388
LFT1	YML037C	chrXIII	-	9.21899	0.294531	0.834306	0.353026	0.724069	0.998763		9.21899	0.838778	0.808914	1.03692	0.299774	0.999182
ALY2	YJL084C	chrX	-	62.1426	0.294406	0.319057	0.922738	0.356144	0.977915		62.1426	0.225594	0.319513	0.706054	0.480154	0.999182
GIN4	YDR507C	chrIV	-	94.5177	0.293485	0.265164	1.1068	0.268379	0.941683		94.5177	0.206208	0.265776	0.775873	0.437824	0.999182
SFB3	YHR098C	chrVIII	-	170.656	0.293456	0.202952	1.44594	0.148194	0.798683		170.656	0.359607	0.20189	1.7812	0.0748795	0.806691
AVT3	YKL146W	chrXI	+	61.8912	0.293144	0.317736	0.922604	0.356214	0.977915		61.8912	0.0438125	0.321393	0.136321	0.891568	0.999182
FAR1	YJL157C	chrX	-	67.201	0.292642	0.313247	0.934221	0.35019	0.977915		67.201	0.523362	0.308892	1.69432	0.0902049	0.843732
RRP36	YOR287C	chrXV	-	68.2294	0.292257	0.301464	0.969458	0.332317	0.972559		68.2294	0.289308	0.300815	0.961745	0.336177	0.999182
TFA1	YKL028W	chrXI	+	112.58	0.292241	0.242606	1.20459	0.228361	0.905636		112.58	0.339205	0.241498	1.40459	0.160144	0.977274
HOT13	YKL084W	chrXI	+	229.1	0.292153	0.176344	1.65672	0.0975769	0.675833		229.1	0.00709821	0.178439	0.0397795	0.968269	0.999182
UPS1	YLR193C	chrXII	-	93.6227	0.291821	0.28242	1.03329	0.30147	0.965577		93.6227	0.392958	0.280583	1.4005	0.161362	0.977274
UTP13	YLR222C	chrXII	-	196.536	0.29178	0.190349	1.53287	0.125309	0.752311		196.536	0.397799	0.189009	2.10466	0.035321	0.585257
RPO21	YDL140C	chrIV	-	319.148	0.291442	0.166873	1.74648	0.0807271	0.629265		319.148	0.137462	0.167591	0.820224	0.412089	0.999182
RPH1	YER169W	chrV	+	67.3302	0.290641	0.304978	0.952989	0.340596	0.974761		67.3302	0.117333	0.30718	0.38197	0.702484	0.999182
ENB1	YOL158C	chrXV	-	206.281	0.290405	0.401809	0.722743	0.469838	0.989477		206.281	0.31642	0.40152	0.788056	0.430664	0.999182
SHR5	YOL110W	chrXV	+	1174.87	0.289312	0.1139	2.54005	0.0110837	0.220941		1174.87	0.145741	0.114157	1.27668	0.201716	0.999182
RPP1	YHR062C	chrVIII	-	101.99	0.289165	0.253097	1.14251	0.253243	0.931996		101.99	0.146612	0.254431	0.576235	0.564456	0.999182
NA	YDR183C-A	chrIV	-	104.289	0.289141	0.260409	1.11033	0.266856	0.941683		104.289	0.353094	0.25908	1.36288	0.172921	0.992181
SHH3	YMR118C	chrXIII	-	10.3691	0.289006	0.742296	0.389341	0.697024	0.998763		10.3691	-0.0646514	0.756486	-0.0854627	0.931894	0.999182
SIP5	YMR140W	chrXIII	+	51.1865	0.288731	0.355888	0.811299	0.417194	0.984362		51.1865	0.0118517	0.360379	0.0328867	0.973765	0.999182
APP1	YNL094W	chrXIV	+	72.5573	0.288726	0.300098	0.962105	0.335997	0.973285		72.5573	-0.0131648	0.304264	-0.0432676	0.965488	0.999182
ZRT3	YKL175W	chrXI	+	157.474	0.288634	0.212182	1.36031	0.173731	0.845716		157.474	0.167313	0.212991	0.785537	0.432139	0.999182
MIR1	YJR077C	chrX	-	480.77	0.288552	0.138174	2.08832	0.0367691	0.440075		480.77	0.42967	0.13724	3.1308	0.00174334	0.118734
NTC20	YBR188C	chrII	-	46.2377	0.287771	0.368582	0.780751	0.434949	0.9848		46.2377	-0.0248676	0.374147	-0.0664647	0.947008	0.999182
YUR1	YJL139C	chrX	-	46.7557	0.287648	0.379671	0.757623	0.448676	0.986476		46.7557	0.114931	0.382205	0.300706	0.763639	0.999182
PBR1	YNL181W	chrXIV	+	86.6084	0.287581	0.27773	1.03547	0.300451	0.965455		86.6084	-0.0159199	0.28153	-0.0565476	0.954906	0.999182
CFD1	YIL003W	chrIX	+	58.9656	0.287221	0.333882	0.860248	0.389653	0.982565		58.9656	0.11005	0.336248	0.327287	0.743451	0.999182
MRPL49	YJL096W	chrX	+	312.664	0.287205	0.15809	1.81672	0.06926	0.586411		312.664	0.381149	0.157155	2.42531	0.0152955	0.395953
CAB2	YIL083C	chrIX	-	104.988	0.286421	0.256491	1.11669	0.264127	0.94039		104.988	0.125147	0.258012	0.485043	0.627646	0.999182
BCD1	YHR040W	chrVIII	+	55.4212	0.286344	0.328021	0.872942	0.382695	0.979867		55.4212	0.00906738	0.332532	0.0272677	0.978246	0.999182
SEC66	YBR171W	chrII	+	186.214	0.286052	0.198653	1.43996	0.149879	0.801363		186.214	0.128468	0.199724	0.643227	0.520077	0.999182
MIC10	YCL057C-A	chrIII	-	227.376	0.286019	0.183426	1.55932	0.118922	0.73871		227.376	0.29807	0.182979	1.62899	0.103316	0.880786
RLF2	YPR018W	chrXVI	+	35.3512	0.285762	0.440808	0.648269	0.516811	0.998763		35.3512	0.0966337	0.444052	0.217618	0.827727	0.999182
SLI15	YBR156C	chrII	-	34.8004	0.285641	0.414825	0.688583	0.491086	0.996828		34.8004	0.404902	0.411052	0.98504	0.324605	0.999182
LCB5	YLR260W	chrXII	+	55.8352	0.285473	0.327066	0.87283	0.382756	0.979867		55.8352	-0.408819	0.340249	-1.20153	0.229546	0.999182
GDH3	YAL062W	chrI	+	44.2242	0.285242	0.378901	0.752813	0.451562	0.986476		44.2242	-0.221894	0.388853	-0.570637	0.568246	0.999182
TIM22	YDL217C	chrIV	-	98.9993	0.285103	0.255421	1.11621	0.264332	0.94045		98.9993	0.112273	0.257201	0.436518	0.662461	0.999182
CMC2	YBL059C-A	chrII	-	74.198	0.284796	0.283884	1.00321	0.315758	0.972219		74.198	-0.247873	0.292276	-0.848076	0.396395	0.999182
NA	YHR073W-A	chrVIII	+	69.5659	0.284598	0.310964	0.91521	0.360081	0.977915		69.5659	0.124712	0.312839	0.398645	0.690155	0.999182
MAG2	YLR427W	chrXII	+	63.1752	0.284541	0.316035	0.900349	0.367935	0.977915		63.1752	0.135675	0.317874	0.42682	0.66951	0.999182
VMR1	YHL035C	chrVIII	-	118.286	0.284203	0.451503	0.62946	0.529048	0.998763		118.286	-0.266821	0.454971	-0.586458	0.557568	0.999182
NGL2	YMR285C	chrXIII	-	65.4589	0.284054	0.306384	0.927118	0.353865	0.977915		65.4589	0.123434	0.308419	0.400216	0.688998	0.999182
MEX67	YPL169C	chrXVI	-	95.7191	0.284047	0.258031	1.10083	0.270972	0.941683		95.7191	0.162675	0.25913	0.627772	0.530153	0.999182
NA	YJR056C	chrX	-	61.7301	0.283713	0.316539	0.896297	0.370094	0.977915		61.7301	0.116635	0.318746	0.365918	0.714426	0.999182
DBP6	YNR038W	chrXIV	+	83.7996	0.283232	0.275684	1.02738	0.304241	0.966057		83.7996	0.340827	0.274217	1.24291	0.213902	0.999182
NA	YOR300W	chrXV	+	85.1136	0.282977	0.287173	0.985388	0.324433	0.972559		85.1136	0.433372	0.284516	1.52319	0.127711	0.927203
AVO2	YMR068W	chrXIII	+	19.1223	0.282627	0.558192	0.506327	0.612627	0.998763		19.1223	0.0468647	0.564481	0.0830226	0.933834	0.999182
TAH11	YJR046W	chrX	+	68.1264	0.281942	0.306953	0.918517	0.358348	0.977915		68.1264	0.484354	0.303013	1.59846	0.109941	0.885618
TMA16	YOR252W	chrXV	+	170.396	0.28191	0.207286	1.36001	0.173828	0.845716		170.396	0.168186	0.207977	0.808673	0.418703	0.999182
NA	YBR182C-A	chrII	-	9.77541	0.281256	0.789139	0.356409	0.721534	0.998763		9.77541	0.587862	0.773979	0.759531	0.447535	0.999182
NA	YOR131C	chrXV	-	82.1312	0.280986	0.281197	0.999253	0.317672	0.972219		82.1312	0.283776	0.280531	1.01157	0.311745	0.999182
ADH1	YOL086C	chrXV	-	11138.6	0.280799	0.10419	2.69506	0.00703759	0.172799		11138.6	0.104491	0.10423	1.0025	0.3161	0.999182
ATC1	YDR184C	chrIV	-	105.122	0.2807	0.260617	1.07706	0.281453	0.952214		105.122	0.349978	0.259232	1.35006	0.176998	0.993721
CWC23	YGL128C	chrVII	-	33.7637	0.280594	0.413886	0.677951	0.497803	0.997087		33.7637	-0.12833	0.423186	-0.303248	0.761701	0.999182
MTC1	YJL123C	chrX	-	170.344	0.280449	0.202314	1.38621	0.165684	0.835066		170.344	-0.125425	0.206057	-0.608693	0.542728	0.999182
ERI1	YPL096C-A	chrXVI	-	92.951	0.280286	0.267235	1.04884	0.294252	0.960253		92.951	0.359264	0.265579	1.35276	0.176133	0.992766
GEP4	YHR100C	chrVIII	-	79.6985	0.279857	0.302063	0.926488	0.354193	0.977915		79.6985	0.432563	0.299321	1.44515	0.148417	0.966999
GSC2	YGR032W	chrVII	+	172.589	0.27982	0.213359	1.3115	0.18969	0.87306		172.589	-0.217544	0.217809	-0.998782	0.3179	0.999182
OCA5	YHL029C	chrVIII	-	86.1998	0.279799	0.274457	1.01947	0.307982	0.96639		86.1998	0.179731	0.275294	0.652867	0.513842	0.999182
MSS51	YLR203C	chrXII	-	116.33	0.279564	0.243537	1.14793	0.250997	0.92931		116.33	-0.131837	0.24817	-0.531234	0.595256	0.999182
PTR3	YFR029W	chrVI	+	27.549	0.279363	0.457796	0.610234	0.541707	0.998763		27.549	0.116709	0.461097	0.253112	0.800182	0.999182
DGR2	YKL121W	chrXI	+	38.4724	0.278785	0.396307	0.703457	0.481771	0.992956		38.4724	-0.171826	0.405851	-0.423372	0.672024	0.999182
CCM1	YGR150C	chrVII	-	51.3213	0.278754	0.356547	0.781817	0.434322	0.984452		51.3213	0.109228	0.358951	0.304297	0.760901	0.999182
RBG1	YAL036C	chrI	-	308.825	0.278714	0.161289	1.72804	0.0839806	0.638731		308.825	0.277529	0.161003	1.72375	0.0847538	0.828449
PEX14	YGL153W	chrVII	+	46.8648	0.278695	0.364948	0.763659	0.445071	0.986476		46.8648	-0.158125	0.373171	-0.423735	0.671759	0.999182
REB1	YBR049C	chrII	-	46.8289	0.278466	0.377208	0.73823	0.460375	0.986476		46.8289	0.194235	0.378018	0.513826	0.607374	0.999182
NA	YOR161C-C	chrXV	-	24.5883	0.278092	0.486285	0.571872	0.567409	0.998763		24.5883	0.0688326	0.491136	0.14015	0.888542	0.999182
SNR68	YNCI0001W	chrIX	+	196.347	0.278075	0.491391	0.565893	0.571466	0.998763		196.347	0.828007	0.489353	1.69204	0.0906375	0.843732
ECM18	YDR125C	chrIV	-	17.6225	0.277978	0.570104	0.487591	0.62584	0.998763		17.6225	-0.0824084	0.581285	-0.141769	0.887262	0.999182
SWM2	YNR004W	chrXIV	+	50.1703	0.277232	0.350372	0.79125	0.428798	0.984362		50.1703	0.112666	0.352777	0.319369	0.749447	0.999182
VPS68	YOL129W	chrXV	+	172.75	0.276923	0.199441	1.38849	0.164987	0.832751		172.75	-0.0312124	0.202146	-0.154405	0.87729	0.999182
NAM2	YLR382C	chrXII	-	42.2031	0.276777	0.37669	0.734761	0.462485	0.986476		42.2031	-0.269125	0.388142	-0.693367	0.488079	0.999182
GAL3	YDR009W	chrIV	+	20.0634	0.276276	0.536234	0.515215	0.606403	0.998763		20.0634	-0.109549	0.547538	-0.200076	0.841421	0.999182
ATG26	YLR189C	chrXII	-	36.0628	0.27616	0.408092	0.676711	0.498589	0.997087		36.0628	-0.227894	0.419383	-0.543404	0.586852	0.999182
MBP1	YDL056W	chrIV	+	48.0039	0.275363	0.350441	0.785762	0.432007	0.984362		48.0039	-0.136145	0.358242	-0.380036	0.703918	0.999182
NA	YKL162C-A	chrXI	-	27.1784	0.275175	0.472798	0.582014	0.560557	0.998763		27.1784	-0.139075	0.483105	-0.287877	0.773441	0.999182
INA1	YLR413W	chrXII	+	836.321	0.273644	0.121809	2.2465	0.0246721	0.353804		836.321	0.027144	0.122506	0.221574	0.824646	0.999182
CLG1	YGL215W	chrVII	+	437.578	0.273422	0.147579	1.85272	0.063923	0.562181		437.578	0.232005	0.147569	1.57218	0.115909	0.893647
LSR1	YNCB0019C	chrII	-	82.073	0.273385	0.28946	0.944466	0.344932	0.977915		82.073	0.624307	0.283912	2.19894	0.0278821	0.545016
RFC4	YOL094C	chrXV	-	80.0858	0.273275	0.292274	0.934998	0.349789	0.977915		80.0858	-0.160876	0.298256	-0.539389	0.589618	0.999182
JID1	YPR061C	chrXVI	-	23.5625	0.273231	0.514155	0.531418	0.595129	0.998763		23.5625	0.201764	0.514981	0.391789	0.695214	0.999182
PAC11	YDR488C	chrIV	-	26.2286	0.272828	0.478066	0.570691	0.568209	0.998763		26.2286	0.339339	0.475123	0.714213	0.475096	0.999182
YAP7	YOL028C	chrXV	-	79.2448	0.272803	0.282751	0.964818	0.334636	0.972649		79.2448	0.148725	0.284007	0.523666	0.600511	0.999182
TPO5	YKL174C	chrXI	-	55.3564	0.27265	0.340305	0.801193	0.42302	0.984362		55.3564	0.257636	0.339809	0.758179	0.448344	0.999182
SNR17B	YNCP0005C	chrXVI	-	75.582	0.272525	0.303781	0.89711	0.36966	0.977915		75.582	0.60206	0.298346	2.01799	0.0435922	0.647769
RAD2	YGR258C	chrVII	-	52.1307	0.27251	0.333685	0.816667	0.414119	0.984362		52.1307	-0.326718	0.345369	-0.945996	0.344151	0.999182
NA	YLR297W	chrXII	+	72.4329	0.272314	0.301188	0.904134	0.365924	0.977915		72.4329	-0.0151596	0.305129	-0.0496828	0.960375	0.999182
RBP95	YCR016W	chrIII	+	143.459	0.272238	0.221364	1.22982	0.218764	0.899896		143.459	0.250544	0.221139	1.13297	0.257228	0.999182
MRPS9	YBR146W	chrII	+	121.798	0.272132	0.232354	1.1712	0.24152	0.919932		121.798	0.172681	0.233047	0.740973	0.45871	0.999182
TRL1	YJL087C	chrX	-	43.4068	0.271967	0.373968	0.727249	0.467074	0.987067		43.4068	0.0949644	0.376841	0.252001	0.80104	0.999182
TDH3	YGR192C	chrVII	-	26805.9	0.271593	0.0954507	2.84537	0.00443593	0.126258		26805.9	0.110889	0.0954664	1.16155	0.245417	0.999182
ULP2	YIL031W	chrIX	+	52.1704	0.271449	0.339742	0.798984	0.4243	0.984362		52.1704	0.151169	0.341261	0.442971	0.657787	0.999182
NA	YCR025C	chrIII	-	82.7967	0.27129	0.27979	0.969622	0.332235	0.972559		82.7967	0.158712	0.280832	0.56515	0.571972	0.999182
DSF2	YBR007C	chrII	-	68.3354	0.27085	0.302005	0.896841	0.369804	0.977915		68.3354	0.275341	0.301232	0.914051	0.36069	0.999182
EBS1	YDR206W	chrIV	+	69.7603	0.270635	0.304373	0.889155	0.37392	0.977915		69.7603	0.608463	0.29836	2.03936	0.041414	0.625205
SNR87	YNCK0015C	chrXI	-	67.4209	0.270342	0.31881	0.847972	0.396454	0.984362		67.4209	0.675865	0.311828	2.16743	0.0302021	0.558687
CAB4	YGR277C	chrVII	-	77.2507	0.27029	0.287836	0.939041	0.34771	0.977915		77.2507	-0.00405454	0.29149	-0.0139097	0.988902	0.999182
PHO87	YCR037C	chrIII	-	69.8349	0.269691	0.322456	0.836365	0.402949	0.984362		69.8349	0.25189	0.322079	0.782073	0.434171	0.999182
FRT1	YOR324C	chrXV	-	50.0749	0.269537	0.348441	0.773552	0.439196	0.986122		50.0749	0.300944	0.347005	0.867263	0.385798	0.999182
BRX1	YOL077C	chrXV	-	382.445	0.269111	0.145814	1.84557	0.0649541	0.567556		382.445	0.115278	0.146502	0.786867	0.43136	0.999182
MDM32	YOR147W	chrXV	+	48.9992	0.268891	0.382897	0.702255	0.48252	0.992956		48.9992	-0.0855204	0.388783	-0.219969	0.825895	0.999182
TAL1	YLR354C	chrXII	-	673.657	0.268781	0.123561	2.17529	0.0296087	0.395774		673.657	0.0396799	0.12434	0.319123	0.749633	0.999182
SPL2	YHR136C	chrVIII	-	137.989	0.268392	0.226409	1.18543	0.235848	0.912032		137.989	0.215283	0.226524	0.950373	0.341923	0.999182
NCE102	YPR149W	chrXVI	+	443.477	0.267985	0.144026	1.86066	0.062792	0.558682		443.477	-0.360977	0.147415	-2.44871	0.014337	0.377982
STF1	YDL130W-A	chrIV	+	199.86	0.26797	0.185629	1.44358	0.148857	0.800148		199.86	-0.499375	0.192985	-2.58763	0.00966385	0.324442
SLM5	YCR024C	chrIII	-	38.1416	0.267535	0.438037	0.610758	0.54136	0.998763		38.1416	0.355889	0.435373	0.817435	0.41368	0.999182
PRE3	YJL001W	chrX	+	284.352	0.267364	0.162768	1.64261	0.100463	0.688322		284.352	-0.131111	0.165504	-0.792191	0.428249	0.999182
TFB2	YPL122C	chrXVI	-	72.4688	0.266808	0.300571	0.887668	0.374719	0.977915		72.4688	-0.0358744	0.304773	-0.117708	0.906299	0.999182
NA	YPR063C	chrXVI	-	287.429	0.266773	0.163525	1.63139	0.102808	0.695938		287.429	0.332736	0.162739	2.0446	0.040894	0.625205
IMP3	YHR148W	chrVIII	+	143.939	0.266719	0.226248	1.17888	0.238447	0.917389		143.939	0.234244	0.22614	1.03583	0.30028	0.999182
DST1	YGL043W	chrVII	+	153.306	0.266682	0.207488	1.28529	0.19869	0.880058		153.306	-0.0266862	0.210257	-0.126921	0.899003	0.999182
NCA2	YPR155C	chrXVI	-	28.54	0.265957	0.450396	0.590495	0.554859	0.998763		28.54	0.03383	0.45555	0.074262	0.940802	0.999182
MYO4	YAL029C	chrI	-	127.212	0.265875	0.234636	1.13314	0.257156	0.934426		127.212	-0.0191956	0.237488	-0.0808275	0.935579	0.999182
SOD1	YJR104C	chrX	-	2164.49	0.265666	0.0992372	2.67708	0.00742667	0.177033		2164.49	-0.0214465	0.0996361	-0.215248	0.829574	0.999182
SKS1	YPL026C	chrXVI	-	74.4165	0.265137	0.310542	0.853788	0.393222	0.983851		74.4165	0.519795	0.306207	1.69753	0.0895965	0.841677
SDH8	YBR269C	chrII	-	70.0089	0.264915	0.292501	0.90569	0.3651	0.977915		70.0089	-0.191709	0.29975	-0.639562	0.522457	0.999182
RGT1	YKL038W	chrXI	+	77.9333	0.26485	0.28359	0.933918	0.350346	0.977915		77.9333	0.197499	0.28398	0.695468	0.486762	0.999182
LIP2	YLR239C	chrXII	-	47.8165	0.264618	0.368367	0.718356	0.472538	0.990049		47.8165	-0.110214	0.375063	-0.293854	0.768869	0.999182
DUS4	YLR405W	chrXII	+	82.7841	0.26455	0.277349	0.953854	0.340158	0.974761		82.7841	0.468442	0.273729	1.71134	0.0870192	0.833898
DFP1	YAR023C	chrI	-	20.2029	0.264468	0.537599	0.491943	0.622759	0.998763		20.2029	-0.188213	0.55112	-0.34151	0.73272	0.999182
COX11	YPL132W	chrXVI	+	38.6958	0.26409	0.40539	0.651448	0.514757	0.998763		38.6958	0.215081	0.405536	0.530362	0.595861	0.999182
MDL2	YPL270W	chrXVI	+	116.651	0.263609	0.241258	1.09265	0.274549	0.943651		116.651	0.0327807	0.243591	0.134573	0.89295	0.999182
NA	YDL129W	chrIV	+	33.8849	0.263347	0.43197	0.609643	0.542098	0.998763		33.8849	0.309946	0.429897	0.720977	0.470924	0.999182
CDC19	YAL038W	chrI	+	11060	0.263183	0.0890917	2.95407	0.00313617	0.102526		11060	0.152506	0.0891148	1.71134	0.0870176	0.833898
AIM21	YIR003W	chrIX	+	58.5678	0.263076	0.332063	0.792246	0.428217	0.984362		58.5678	-0.217254	0.340166	-0.638671	0.523037	0.999182
DOG2	YHR043C	chrVIII	-	148.114	0.263055	0.210576	1.24921	0.211587	0.896196		148.114	-0.0757577	0.213935	-0.354116	0.723252	0.999182
NA	YDR061W	chrIV	+	78.4641	0.262559	0.287216	0.91415	0.360638	0.977915		78.4641	0.085932	0.289284	0.29705	0.766428	0.999182
FLX1	YIL134W	chrIX	+	251.262	0.261874	0.399617	0.655312	0.512267	0.998763		251.262	0.663265	0.398138	1.66592	0.0957299	0.858723
SPT21	YMR179W	chrXIII	+	32.7001	0.261827	0.454384	0.576223	0.564464	0.998763		32.7001	-0.0334409	0.460375	-0.0726383	0.942094	0.999182
FZO1	YBR179C	chrII	-	39.4487	0.26165	0.392512	0.666604	0.505025	0.998763		39.4487	0.0272821	0.396836	0.0687491	0.945189	0.999182
USA1	YML029W	chrXIII	+	2949.31	0.261592	0.103925	2.51712	0.0118319	0.227148		2949.31	0.147656	0.104003	1.41972	0.155689	0.971508
UGA2	YBR006W	chrII	+	51.1536	0.26159	0.348183	0.751299	0.452473	0.986476		51.1536	-0.31679	0.359181	-0.88198	0.377788	0.999182
PPT1	YGR123C	chrVII	-	184.954	0.261586	0.202455	1.29207	0.196333	0.879742		184.954	0.170433	0.202901	0.839982	0.400918	0.999182
CUS1	YMR240C	chrXIII	-	29.8402	0.261304	0.453283	0.576469	0.564298	0.998763		29.8402	0.302218	0.451185	0.669831	0.502965	0.999182
PEX7	YDR142C	chrIV	-	49.7283	0.261107	0.357454	0.730463	0.465107	0.986476		49.7283	0.270251	0.356465	0.758141	0.448367	0.999182
YSC84	YHR016C	chrVIII	-	41.5769	0.260987	0.407569	0.64035	0.521945	0.998763		41.5769	0.0506861	0.411012	0.12332	0.901854	0.999182
NUC1	YJL208C	chrX	-	110.957	0.260925	0.253981	1.02734	0.304261	0.966057		110.957	0.321436	0.252734	1.27183	0.203432	0.999182
CUP9	YPL177C	chrXVI	-	184.089	0.260914	0.200234	1.30305	0.192558	0.877848		184.089	0.115352	0.2012	0.573321	0.566427	0.999182
BOS1	YLR078C	chrXII	-	96.1422	0.260512	0.261272	0.997091	0.31872	0.97248		96.1422	0.355773	0.259412	1.37146	0.170233	0.988789
BIO3	YNR058W	chrXIV	+	14.2828	0.260282	0.65483	0.397481	0.691013	0.998763		14.2828	0.362886	0.649569	0.558656	0.576397	0.999182
TSC13	YDL015C	chrIV	-	239.857	0.260124	0.184979	1.40624	0.159653	0.821382		239.857	0.130079	0.185658	0.700635	0.483531	0.999182
GRE3	YHR104W	chrVIII	+	84.8351	0.25996	0.267398	0.972185	0.330959	0.972559		84.8351	-0.460111	0.278559	-1.65175	0.0985847	0.863405
PPA2	YMR267W	chrXIII	+	56.2206	0.259787	0.333828	0.778205	0.436448	0.985317		56.2206	0.0449566	0.337035	0.133389	0.893886	0.999182
ILT1	YDR090C	chrIV	-	47.6523	0.259657	0.358412	0.724465	0.468781	0.988534		47.6523	0.342981	0.355915	0.963661	0.335216	0.999182
TPC1	YGR096W	chrVII	+	24.0123	0.259432	0.505073	0.513652	0.607495	0.998763		24.0123	0.282997	0.503223	0.562368	0.573865	0.999182
RIO1	YOR119C	chrXV	-	103.956	0.259348	0.2553	1.01585	0.309699	0.96639		103.956	0.252586	0.254839	0.991159	0.321608	0.999182
BUD31	YCR063W	chrIII	+	79.4843	0.25928	0.285153	0.909267	0.363209	0.977915		79.4843	-0.110389	0.290284	-0.38028	0.703737	0.999182
SWF1	YDR126W	chrIV	+	196.173	0.259131	0.198922	1.30268	0.192685	0.877848		196.173	0.249149	0.198633	1.25432	0.209726	0.999182
CLB3	YDL155W	chrIV	+	70.5182	0.258898	0.298273	0.867992	0.385399	0.979867		70.5182	0.227448	0.298096	0.763002	0.445462	0.999182
NUP42	YDR192C	chrIV	-	39.6314	0.258616	0.397497	0.650611	0.515297	0.998763		39.6314	0.493333	0.391562	1.25991	0.207702	0.999182
MSH6	YDR097C	chrIV	-	68.7032	0.25846	0.303011	0.852975	0.393673	0.983851		68.7032	0.345443	0.3009	1.14803	0.250956	0.999182
SLK19	YOR195W	chrXV	+	57.576	0.258319	0.341555	0.756303	0.449468	0.986476		57.576	0.0459058	0.344563	0.133229	0.894012	0.999182
PRI1	YIR008C	chrIX	-	56.6207	0.258072	0.327201	0.788726	0.430272	0.984362		56.6207	0.178052	0.327903	0.543	0.58713	0.999182
RNR2	YJL026W	chrX	+	610.272	0.257796	0.133964	1.92436	0.0543091	0.523424		610.272	0.0281485	0.134762	0.208876	0.834545	0.999182
SAC1	YKL212W	chrXI	+	248.579	0.257653	0.175877	1.46496	0.142931	0.791577		248.579	-0.0737955	0.178213	-0.414085	0.678812	0.999182
ECM1	YAL059W	chrI	+	192.192	0.257521	0.205257	1.25463	0.209613	0.896196		192.192	0.169023	0.205655	0.821875	0.411148	0.999182
MAL32	YBR299W	chrII	+	14.6655	0.257273	0.632242	0.406921	0.684066	0.998763		14.6655	-0.30909	0.652794	-0.473488	0.635865	0.999182
SRB8	YCR081W	chrIII	+	41.9272	0.257206	0.392746	0.654892	0.512537	0.998763		41.9272	0.284519	0.391303	0.727107	0.46716	0.999182
KAR5	YMR065W	chrXIII	+	18.1897	0.256981	0.567459	0.452863	0.650647	0.998763		18.1897	-0.426753	0.590495	-0.722704	0.469862	0.999182
AIM18	YHR198C	chrVIII	-	27.591	0.25646	0.51117	0.501711	0.615871	0.998763		27.591	-0.737877	0.53778	-1.37208	0.170039	0.988789
MLP2	YIL149C	chrIX	-	70.8482	0.255772	0.326246	0.783984	0.433049	0.984362		70.8482	-0.188484	0.332483	-0.5669	0.570782	0.999182
PCL8	YPL219W	chrXVI	+	27.0844	0.25558	0.491868	0.51961	0.603335	0.998763		27.0844	0.0974569	0.494877	0.196932	0.843881	0.999182
AIM24	YJR080C	chrX	-	81.1839	0.255121	0.291097	0.876414	0.380805	0.978798		81.1839	-0.00740956	0.29436	-0.0251718	0.979918	0.999182
TOM7	YNL070W	chrXIV	+	400.799	0.254811	0.153214	1.66311	0.0962909	0.670985		400.799	0.209571	0.153225	1.36773	0.171396	0.99146
SOA1	YIL166C	chrIX	-	11.2251	0.254763	0.735164	0.346539	0.728938	0.998763		11.2251	0.695436	0.715518	0.971934	0.331083	0.999182
CLU1	YMR012W	chrXIII	+	361.513	0.254506	0.156392	1.62736	0.10366	0.698513		361.513	0.221798	0.156328	1.4188	0.155957	0.971508
MATALPHA2	YCR039C	chrIII	-	58.7947	0.254416	0.32876	0.773866	0.43901	0.986092		58.7947	-0.372454	0.339904	-1.09576	0.273183	0.999182
YAR1	YPL239W	chrXVI	+	233.499	0.254025	0.176123	1.44232	0.149213	0.800795		233.499	0.166255	0.176501	0.941947	0.34622	0.999182
HYR1	YIR037W	chrIX	+	346.244	0.253703	0.158219	1.60349	0.108827	0.708306		346.244	-0.0498117	0.159899	-0.31152	0.755406	0.999182
RPL8A	YHL033C	chrVIII	-	1909.44	0.25356	0.101611	2.49539	0.012582	0.235468		1909.44	0.218968	0.101594	2.15531	0.0311372	0.563722
VAC7	YNL054W	chrXIV	+	49.6506	0.253214	0.347271	0.729153	0.465908	0.986476		49.6506	-0.193039	0.355677	-0.542737	0.587311	0.999182
CIP1	YPL014W	chrXVI	+	57.554	0.252999	0.346617	0.729909	0.465446	0.986476		57.554	-0.596129	0.362137	-1.64614	0.0997342	0.863405
UTR4	YEL038W	chrV	+	150.972	0.252848	0.215469	1.17348	0.240605	0.919731		150.972	-0.0222191	0.217984	-0.10193	0.918812	0.999182
GLK1	YCL040W	chrIII	+	540.339	0.252554	0.136767	1.8466	0.0648056	0.567556		540.339	-0.654042	0.141332	-4.62769	3.7e-06	0.00105773
MTG1	YMR097C	chrXIII	-	44.2811	0.252451	0.371147	0.68019	0.496384	0.997087		44.2811	-0.0295863	0.376283	-0.0786279	0.937329	0.999182
UTP30	YKR060W	chrXI	+	83.6401	0.252291	0.287555	0.877366	0.380288	0.978689		83.6401	0.591245	0.282218	2.09499	0.0361716	0.586226
RAV2	YDR202C	chrIV	-	42.094	0.251701	0.371776	0.677023	0.498392	0.997087		42.094	-0.449753	0.387483	-1.1607	0.245762	0.999182
NA	YBR259W	chrII	+	33.7146	0.251465	0.441013	0.570198	0.568544	0.998763		33.7146	0.183663	0.441601	0.415903	0.677481	0.999182
GSR1	YMR295C	chrXIII	-	480.854	0.251256	0.149205	1.68396	0.0921897	0.662262		480.854	0.156817	0.149451	1.04929	0.294047	0.999182
NAS6	YGR232W	chrVII	+	115.706	0.251231	0.23518	1.06825	0.285408	0.956539		115.706	0.0537952	0.237166	0.226825	0.82056	0.999182
NOP14	YDL148C	chrIV	-	156.084	0.251066	0.210051	1.19526	0.231984	0.907165		156.084	0.137954	0.210795	0.654448	0.512823	0.999182
NA	YPL108W	chrXVI	+	42.2238	0.250891	0.380865	0.658741	0.510062	0.998763		42.2238	-0.367896	0.394066	-0.933589	0.350516	0.999182
IES5	YER092W	chrV	+	128.53	0.250634	0.2456	1.0205	0.307492	0.96639		128.53	0.172628	0.245984	0.701784	0.482814	0.999182
AVL9	YLR114C	chrXII	-	84.5436	0.250433	0.278089	0.900553	0.367826	0.977915		84.5436	0.433318	0.274845	1.57659	0.11489	0.893647
NPR3	YHL023C	chrVIII	-	30.1708	0.250041	0.440349	0.567825	0.570154	0.998763		30.1708	-0.0915968	0.448328	-0.204307	0.838113	0.999182
PGA3	YML125C	chrXIII	-	312.719	0.24991	0.163964	1.52418	0.127464	0.752311		312.719	-0.0256375	0.165562	-0.154851	0.876939	0.999182
YTM1	YOR272W	chrXV	+	194.325	0.24986	0.192908	1.29523	0.195241	0.879588		194.325	0.328552	0.191804	1.71295	0.086721	0.833898
SYG1	YIL047C	chrIX	-	166.412	0.24985	0.201789	1.23817	0.215653	0.899896		166.412	0.207067	0.201792	1.02614	0.304826	0.999182
GPI14	YJR013W	chrX	+	64.7177	0.249572	0.307244	0.812291	0.416625	0.984362		64.7177	0.0298583	0.310363	0.0962044	0.923358	0.999182
CTF19	YPL018W	chrXVI	+	36.5507	0.249104	0.436284	0.570968	0.568021	0.998763		36.5507	0.0453038	0.43982	0.103005	0.917959	0.999182
YPR1	YDR368W	chrIV	+	108.702	0.249085	0.244218	1.01993	0.307763	0.96639		108.702	0.130704	0.245209	0.533028	0.594014	0.999182
PSK1	YAL017W	chrI	+	53.0215	0.248391	0.389469	0.637768	0.523625	0.998763		53.0215	-0.0636468	0.394079	-0.161508	0.871694	0.999182
GRR1	YJR090C	chrX	-	58.8997	0.247626	0.343515	0.720858	0.470997	0.989477		58.8997	0.478024	0.338949	1.41031	0.158447	0.972787
MCM16	YPR046W	chrXVI	+	25.5301	0.2474	0.484139	0.511009	0.609345	0.998763		25.5301	0.346315	0.480254	0.721109	0.470842	0.999182
COG2	YGR120C	chrVII	-	51.2387	0.246852	0.353329	0.698647	0.484773	0.994045		51.2387	-0.144428	0.360211	-0.400954	0.688454	0.999182
MAF1	YDR005C	chrIV	-	65.511	0.246426	0.307876	0.800405	0.423476	0.984362		65.511	0.134536	0.309071	0.435293	0.66335	0.999182
THI6	YPL214C	chrXVI	-	47.4441	0.246201	0.375985	0.654817	0.512585	0.998763		47.4441	-0.0573437	0.381153	-0.150448	0.880411	0.999182
HRQ1	YDR291W	chrIV	+	36.8796	0.246193	0.407075	0.604786	0.545321	0.998763		36.8796	-0.0110507	0.412098	-0.0268156	0.978607	0.999182
CUE3	YGL110C	chrVII	-	86.0576	0.246126	0.277599	0.886623	0.375282	0.977915		86.0576	-0.039527	0.281186	-0.140572	0.888208	0.999182
MDM20	YOL076W	chrXV	+	50.811	0.24525	0.353459	0.693856	0.487773	0.996033		50.811	0.337501	0.350905	0.961801	0.33615	0.999182
NAM8	YHR086W	chrVIII	+	57.5489	0.245106	0.323632	0.75736	0.448834	0.986476		57.5489	-0.0316261	0.328067	-0.0964011	0.923202	0.999182
GCD11	YER025W	chrV	+	472.719	0.244955	0.143813	1.70329	0.0885135	0.647552		472.719	0.173578	0.143955	1.20578	0.227902	0.999182
NSA1	YGL111W	chrVII	+	146.654	0.244922	0.215496	1.13655	0.255727	0.934426		146.654	0.251761	0.214961	1.1712	0.24152	0.999182
NA	YKL091C	chrXI	-	28.3765	0.244815	0.48228	0.50762	0.61172	0.998763		28.3765	-0.290763	0.495387	-0.58694	0.557244	0.999182
AIM10	YER087W	chrV	+	28.5459	0.244787	0.466024	0.525267	0.599397	0.998763		28.5459	-0.0988992	0.474048	-0.208627	0.834739	0.999182
NA	YOL029C	chrXV	-	81.7905	0.244324	0.277185	0.881446	0.378077	0.97843		81.7905	0.1964	0.277271	0.708334	0.478738	0.999182
FMP16	YDR070C	chrIV	-	16.7029	0.244264	0.613568	0.398104	0.690554	0.998763		16.7029	-0.417301	0.635918	-0.656219	0.511683	0.999182
SNT2	YGL131C	chrVII	-	38.952	0.244254	0.390237	0.625912	0.531373	0.998763		38.952	-0.210354	0.400007	-0.525877	0.598974	0.999182
NA	YIL047C-A	chrIX	-	172.803	0.244033	0.198831	1.22734	0.219695	0.90079		172.803	0.195736	0.198889	0.98415	0.325042	0.999182
RPF1	YHR088W	chrVIII	+	181.14	0.243993	0.197984	1.23239	0.217804	0.899896		181.14	0.0754189	0.199207	0.378596	0.704988	0.999182
YTA12	YMR089C	chrXIII	-	142.733	0.243951	0.214816	1.13563	0.256112	0.934426		142.733	-0.0883149	0.218166	-0.404806	0.68562	0.999182
SNG1	YGR197C	chrVII	-	38.6651	0.243918	0.399515	0.610536	0.541507	0.998763		38.6651	0.415653	0.394813	1.05279	0.292439	0.999182
HCM1	YCR065W	chrIII	+	62.3527	0.243782	0.3237	0.75311	0.451384	0.986476		62.3527	0.343191	0.321304	1.06812	0.285467	0.999182
MPA43	YNL249C	chrXIV	-	28.0494	0.243768	0.472678	0.515717	0.606052	0.998763		28.0494	0.215703	0.472309	0.456698	0.647888	0.999182
SMX3	YPR182W	chrXVI	+	115.517	0.242813	0.240339	1.01029	0.312355	0.969444		115.517	0.536151	0.236255	2.26937	0.0232458	0.49996
DRS1	YLL008W	chrXII	+	221.291	0.242766	0.196365	1.2363	0.216346	0.899896		221.291	0.299203	0.195582	1.52981	0.126064	0.926709
PBA1	YLR199C	chrXII	-	91.0179	0.242734	0.274807	0.883287	0.377081	0.977915		91.0179	0.00707202	0.277519	0.025483	0.97967	0.999182
SHE1	YBL031W	chrII	+	14.1012	0.24249	0.666688	0.363724	0.716064	0.998763		14.1012	0.937907	0.640142	1.46515	0.142879	0.954975
NAF1	YNL124W	chrXIV	+	141.042	0.242485	0.228642	1.06055	0.288896	0.956539		141.042	0.263914	0.22796	1.15772	0.246979	0.999182
NA	YPR078C	chrXVI	-	37.9305	0.242012	0.406283	0.595673	0.551394	0.998763		37.9305	0.404717	0.401766	1.00735	0.313769	0.999182
NA	YKR012C	chrXI	-	13.3946	0.242003	0.686665	0.352432	0.724515	0.998763		13.3946	0.791045	0.665017	1.18951	0.234239	0.999182
COI1	YDR381C-A	chrIV	-	110.179	0.241174	0.244367	0.986933	0.323675	0.972559		110.179	-0.260759	0.250564	-1.04069	0.298021	0.999182
PTK1	YKL198C	chrXI	-	78.3399	0.241015	0.294989	0.817033	0.41391	0.984362		78.3399	0.575612	0.289481	1.98843	0.0467643	0.665519
UBI4	YLL039C	chrXII	-	377.17	0.240881	0.151446	1.59054	0.111714	0.713484		377.17	-0.353379	0.15501	-2.27972	0.0226242	0.491174
CBF2	YGR140W	chrVII	+	44.1103	0.24085	0.367594	0.655208	0.512334	0.998763		44.1103	0.190386	0.367771	0.517674	0.604686	0.999182
AAC1	YMR056C	chrXIII	-	43.1284	0.240764	0.372693	0.646011	0.518272	0.998763		43.1284	-0.114942	0.379618	-0.302783	0.762055	0.999182
LDB16	YCL005W	chrIII	+	59.9242	0.240184	0.352001	0.68234	0.495024	0.997087		59.9242	0.481722	0.34744	1.38649	0.165597	0.979795
INM1	YHR046C	chrVIII	-	89.2614	0.240095	0.290173	0.827418	0.408	0.984362		89.2614	0.227112	0.289778	0.783745	0.43319	0.999182
NA	YBL036C	chrII	-	224.396	0.240067	0.191424	1.25411	0.209801	0.896196		224.396	0.163308	0.191696	0.851915	0.394261	0.999182
NOP19	YGR251W	chrVII	+	87.5095	0.240051	0.269493	0.890749	0.373064	0.977915		87.5095	-0.22351	0.275932	-0.810016	0.417931	0.999182
CCW14	YLR390W-A	chrXII	+	1923.81	0.239634	0.106708	2.2457	0.0247232	0.353804		1923.81	0.0730305	0.106916	0.683063	0.494567	0.999182
TIF4632	YGL049C	chrVII	-	112.789	0.239388	0.250146	0.956994	0.33857	0.974761		112.789	-0.259407	0.25601	-1.01327	0.310933	0.999182
PRC1	YMR297W	chrXIII	+	490.996	0.239366	0.136414	1.75471	0.0793094	0.624828		490.996	-0.196868	0.138532	-1.4211	0.155288	0.971508
SNF6	YHL025W	chrVIII	+	153.368	0.239292	0.226252	1.05763	0.290222	0.956539		153.368	0.210304	0.226115	0.930077	0.352331	0.999182
ZAP1	YJL056C	chrX	-	34.1878	0.238791	0.422933	0.564607	0.572341	0.998763		34.1878	0.302641	0.420425	0.719845	0.47162	0.999182
VHR1	YIL056W	chrIX	+	87.1904	0.238235	0.279484	0.85241	0.393986	0.983851		87.1904	0.371339	0.277028	1.34044	0.180103	0.997456
IRC19	YLL033W	chrXII	+	17.4485	0.23794	0.589189	0.403843	0.686328	0.998763		17.4485	0.46182	0.580407	0.795681	0.426217	0.999182
UTP7	YER082C	chrV	-	160.079	0.237926	0.209493	1.13573	0.256071	0.934426		160.079	-0.0610994	0.212198	-0.287936	0.773395	0.999182
PRE10	YOR362C	chrXV	-	237.685	0.237852	0.179778	1.32303	0.185826	0.86643		237.685	0.0876503	0.180653	0.485185	0.627545	0.999182
MSH1	YHR120W	chrVIII	+	38.4643	0.237844	0.401905	0.591793	0.553989	0.998763		38.4643	-0.193661	0.410938	-0.471265	0.637451	0.999182
MRM2	YGL136C	chrVII	-	27.9371	0.237739	0.462932	0.51355	0.607566	0.998763		27.9371	-0.717818	0.490596	-1.46316	0.143425	0.954975
BUD7	YOR299W	chrXV	+	109.855	0.23771	0.26054	0.912374	0.361572	0.977915		109.855	0.325999	0.25898	1.25878	0.20811	0.999182
EFG1	YGR271C-A	chrVII	-	137.275	0.237577	0.218629	1.08667	0.277184	0.948993		137.275	0.0779497	0.21999	0.354333	0.723089	0.999182
TIM17	YJL143W	chrX	+	337.72	0.237575	0.156049	1.52244	0.127898	0.752311		337.72	-0.0464655	0.157666	-0.294708	0.768217	0.999182
TRE2	YOR256C	chrXV	-	58.4981	0.237067	0.323695	0.73238	0.463937	0.986476		58.4981	-0.111125	0.329437	-0.337318	0.735877	0.999182
NAT4	YMR069W	chrXIII	+	11.7694	0.236829	0.707268	0.33485	0.737738	0.998763		11.7694	0.3165	0.702271	0.450681	0.65222	0.999182
TAZ1	YPR140W	chrXVI	+	64.3598	0.235942	0.31961	0.73822	0.460381	0.986476		64.3598	-0.415146	0.330622	-1.25565	0.209243	0.999182
SNX4	YJL036W	chrX	+	59.8419	0.23592	0.32988	0.715169	0.474505	0.990992		59.8419	-0.359132	0.340173	-1.05573	0.291091	0.999182
MPC54	YOR177C	chrXV	-	22.8872	0.235453	0.507392	0.464046	0.642615	0.998763		22.8872	0.011855	0.51287	0.023115	0.981559	0.999182
UPC2	YDR213W	chrIV	+	46.6156	0.2353	0.361502	0.650894	0.515115	0.998763		46.6156	0.088432	0.363661	0.243172	0.807873	0.999182
RAD10	YML095C	chrXIII	-	22.07	0.235257	0.518147	0.454036	0.649803	0.998763		22.07	0.138404	0.519805	0.266262	0.790037	0.999182
EHT1	YBR177C	chrII	-	96.1284	0.23519	0.265335	0.88639	0.375407	0.977915		96.1284	0.191436	0.265352	0.721444	0.470636	0.999182
CTF13	YMR094W	chrXIII	+	11.6807	0.235039	0.745131	0.315433	0.752433	0.998763		11.6807	0.667482	0.726779	0.918412	0.358403	0.999182
RTT109	YLL002W	chrXII	+	18.2797	0.234951	0.592691	0.396413	0.6918	0.998763		18.2797	0.0103279	0.598613	0.017253	0.986235	0.999182
PSO2	YMR137C	chrXIII	-	21.0229	0.234808	0.543346	0.432151	0.665631	0.998763		21.0229	-0.0593063	0.551153	-0.107604	0.91431	0.999182
RNR4	YGR180C	chrVII	-	778.003	0.234468	0.130119	1.80195	0.0715534	0.60023		778.003	0.0965035	0.130444	0.739811	0.459415	0.999182
ADE16	YLR028C	chrXII	-	236.765	0.234175	0.175571	1.33379	0.182273	0.862519		236.765	-0.065118	0.177757	-0.366332	0.714117	0.999182
KRR1	YCL059C	chrIII	-	290.353	0.233932	0.160605	1.45656	0.145237	0.794125		290.353	-0.139699	0.163143	-0.856298	0.391833	0.999182
PSH1	YOL054W	chrXV	+	64.3726	0.233853	0.308722	0.757485	0.448759	0.986476		64.3726	-0.0532914	0.313075	-0.170219	0.864838	0.999182
BUD17	YNR027W	chrXIV	+	90.2436	0.233607	0.26489	0.881902	0.37783	0.97843		90.2436	0.113431	0.266021	0.4264	0.669817	0.999182
SXM1	YDR395W	chrIV	+	236.299	0.233371	0.183354	1.27279	0.203094	0.887624		236.299	0.178968	0.183446	0.975588	0.329269	0.999182
CBP6	YBR120C	chrII	-	41.2192	0.23298	0.376061	0.619528	0.535569	0.998763		41.2192	-0.217171	0.385539	-0.563291	0.573236	0.999182
IMG1	YCR046C	chrIII	-	275.264	0.232879	0.17414	1.33731	0.181123	0.861349		275.264	0.158723	0.174365	0.910292	0.362669	0.999182
NA	YPL277C	chrXVI	-	7.29074	0.232836	0.874158	0.266355	0.789966	0.998763		7.29074	0.0074425	0.884248	0.00841675	0.993284	0.999182
NA	YDR154C	chrIV	-	2726.05	0.23271	0.103635	2.24548	0.0247372	0.353804		2726.05	-0.0530062	0.103938	-0.509978	0.610067	0.999182
CPR1	YDR155C	chrIV	-	2726.51	0.232631	0.103593	2.24563	0.0247277	0.353804		2726.51	-0.0529893	0.103896	-0.510022	0.610036	0.999182
MRPL22	YNL177C	chrXIV	-	79.0866	0.232469	0.278715	0.834077	0.404238	0.984362		79.0866	-0.0309971	0.282253	-0.10982	0.912552	0.999182
NAN1	YPL126W	chrXVI	+	277.819	0.232373	0.172652	1.3459	0.178334	0.855194		277.819	-0.0328857	0.174289	-0.188685	0.85034	0.999182
PML1	YLR016C	chrXII	-	58.6572	0.232345	0.346802	0.669965	0.50288	0.998763		58.6572	0.198804	0.346648	0.573504	0.566303	0.999182
CKB1	YGL019W	chrVII	+	170.764	0.232342	0.202433	1.14775	0.251073	0.92931		170.764	0.128141	0.203051	0.631078	0.527989	0.999182
KRE9	YJL174W	chrX	+	233.199	0.232325	0.176328	1.31757	0.187646	0.869928		233.199	0.202725	0.176218	1.15042	0.249972	0.999182
SNC1	YAL030W	chrI	+	92.6443	0.232308	0.278435	0.834334	0.404093	0.984362		92.6443	-0.0732575	0.282051	-0.259731	0.795071	0.999182
FAA1	YOR317W	chrXV	+	212.757	0.232249	0.203305	1.14237	0.253301	0.931996		212.757	-0.410931	0.208483	-1.97105	0.048718	0.67814
PHO81	YGR233C	chrVII	-	100.86	0.232234	0.257512	0.901837	0.367144	0.977915		100.86	0.245807	0.256771	0.957304	0.338414	0.999182
RBH1	YJL181W	chrX	+	42.9681	0.231907	0.40443	0.573416	0.566363	0.998763		42.9681	0.173132	0.404752	0.427749	0.668834	0.999182
NA	YEL023C	chrV	-	22.5245	0.231727	0.509656	0.454673	0.649345	0.998763		22.5245	-0.307558	0.52549	-0.585279	0.55836	0.999182
KRE33	YNL132W	chrXIV	+	279.692	0.231518	0.169144	1.36876	0.171073	0.841776		279.692	0.277242	0.168502	1.64534	0.0998998	0.863405
VRP1	YLR337C	chrXII	-	64.9234	0.231234	0.307284	0.75251	0.451745	0.986476		64.9234	-0.124163	0.312878	-0.396841	0.691485	0.999182
TUB4	YLR212C	chrXII	-	40.1308	0.231117	0.394587	0.585718	0.558065	0.998763		40.1308	0.169746	0.395005	0.429732	0.66739	0.999182
ARO9	YHR137W	chrVIII	+	23.085	0.231109	0.494705	0.467166	0.640381	0.998763		23.085	-0.522793	0.518234	-1.0088	0.313072	0.999182
EMW1	YNL313C	chrXIV	-	149.006	0.231	0.235559	0.980645	0.326768	0.972559		149.006	0.213908	0.235305	0.909067	0.363315	0.999182
RGS2	YOR107W	chrXV	+	43.0809	0.23072	0.389299	0.592655	0.553412	0.998763		43.0809	0.470407	0.383602	1.22629	0.22009	0.999182
KAR9	YPL269W	chrXVI	+	23.5195	0.230634	0.496365	0.464645	0.642186	0.998763		23.5195	-0.189213	0.508004	-0.372463	0.709548	0.999182
SUP35	YDR172W	chrIV	+	425.787	0.230501	0.153811	1.4986	0.133978	0.769566		425.787	0.256691	0.153446	1.67284	0.0943594	0.853571
NA	YKR073C	chrXI	-	61.3814	0.229829	0.322658	0.712299	0.47628	0.990992		61.3814	0.220631	0.322082	0.685015	0.493335	0.999182
RDL1	YOR285W	chrXV	+	371.504	0.229404	0.150325	1.52605	0.126998	0.752311		371.504	-0.13926	0.152414	-0.913697	0.360876	0.999182
DUG1	YFR044C	chrVI	-	411.871	0.229357	0.143805	1.59491	0.110732	0.710801		411.871	0.101817	0.144302	0.705584	0.480447	0.999182
TEC1	YBR083W	chrII	+	156.112	0.228925	0.215145	1.06405	0.287305	0.956539		156.112	0.351414	0.213468	1.64621	0.0997198	0.863405
CKA1	YIL035C	chrIX	-	147.835	0.228547	0.215196	1.06204	0.288218	0.956539		147.835	0.216554	0.214866	1.00786	0.313522	0.999182
TMA108	YIL137C	chrIX	-	83.5018	0.228541	0.273069	0.836934	0.40263	0.984362		83.5018	0.0268258	0.275518	0.0973649	0.922437	0.999182
CIN5	YOR028C	chrXV	-	37.2372	0.228402	0.422549	0.540534	0.588829	0.998763		37.2372	-0.322217	0.434364	-0.741813	0.4582	0.999182
PRP39	YML046W	chrXIII	+	48.8514	0.228214	0.353197	0.646138	0.51819	0.998763		48.8514	0.144127	0.354039	0.407094	0.683939	0.999182
MSB3	YNL293W	chrXIV	+	97.1886	0.228192	0.280786	0.812691	0.416395	0.984362		97.1886	0.139288	0.281371	0.495033	0.620577	0.999182
JIP5	YPR169W	chrXVI	+	127.884	0.22764	0.23257	0.978804	0.327677	0.972559		127.884	0.0780889	0.233825	0.333963	0.738407	0.999182
RAD27	YKL113C	chrXI	-	90.1158	0.227576	0.265282	0.857865	0.390967	0.983606		90.1158	0.321421	0.263335	1.22058	0.222246	0.999182
CKB2	YOR039W	chrXV	+	148.108	0.227141	0.212944	1.06667	0.286119	0.956539		148.108	0.0617879	0.214305	0.288318	0.773104	0.999182
SOH1	YGL127C	chrVII	-	59.1179	0.227035	0.331891	0.684064	0.493935	0.997087		59.1179	0.418331	0.327845	1.276	0.201955	0.999182
NA	YPL119C-A	chrXVI	-	15.2681	0.226996	0.612474	0.370622	0.710919	0.998763		15.2681	-0.090916	0.622942	-0.145946	0.883964	0.999182
NA	YLR252W	chrXII	+	23.3004	0.226676	0.514911	0.440223	0.659775	0.998763		23.3004	0.375463	0.509489	0.736941	0.461158	0.999182
IKI1	YHR187W	chrVIII	+	53.2244	0.226661	0.350566	0.646557	0.517918	0.998763		53.2244	0.102447	0.352091	0.290967	0.771077	0.999182
SYM1	YLR251W	chrXII	+	22.8063	0.226651	0.51571	0.439494	0.660304	0.998763		22.8063	0.291375	0.512599	0.568426	0.569746	0.999182
REE1	YJL217W	chrX	+	787.426	0.226496	0.255435	0.886707	0.375237	0.977915		787.426	-0.072939	0.255887	-0.285044	0.77561	0.999182
BCP1	YDR361C	chrIV	-	198.843	0.226349	0.19098	1.1852	0.235939	0.912032		198.843	0.294758	0.189977	1.55154	0.120771	0.907495
IOC4	YMR044W	chrXIII	+	59.6196	0.22626	0.318549	0.710283	0.477529	0.991538		59.6196	-0.117995	0.32421	-0.363947	0.715897	0.999182
TRZ1	YKR079C	chrXI	-	89.6825	0.226088	0.265174	0.852602	0.39388	0.983851		89.6825	0.0247558	0.267517	0.0925394	0.926269	0.999182
ATG3	YNR007C	chrXIV	-	42.1281	0.226068	0.388046	0.58258	0.560176	0.998763		42.1281	-0.0693026	0.393536	-0.176102	0.860214	0.999182
AMA1	YGR225W	chrVII	+	10.3915	0.225967	0.734965	0.307452	0.758499	0.998763		10.3915	-0.212162	0.753608	-0.281529	0.778305	0.999182
PPZ2	YDR436W	chrIV	+	46.8776	0.22524	0.357833	0.629455	0.529051	0.998763		46.8776	-0.187475	0.365774	-0.512544	0.60827	0.999182
DOC1	YGL240W	chrVII	+	75.1107	0.225222	0.305058	0.738293	0.460337	0.986476		75.1107	0.285544	0.303517	0.940783	0.346816	0.999182
ACS1	YAL054C	chrI	-	43.5217	0.225202	0.38913	0.578733	0.562769	0.998763		43.5217	-0.243209	0.398259	-0.610681	0.54141	0.999182
RIM21	YNL294C	chrXIV	-	132.919	0.225167	0.230061	0.978728	0.327714	0.972559		132.919	-0.133261	0.233751	-0.570097	0.568612	0.999182
ERG5	YMR015C	chrXIII	-	252.724	0.22506	0.173727	1.29548	0.195155	0.879588		252.724	-0.0334615	0.175462	-0.190705	0.848757	0.999182
MDM34	YGL219C	chrVII	-	61.847	0.224872	0.324116	0.6938	0.487807	0.996033		61.847	-0.0295718	0.327844	-0.0902009	0.928128	0.999182
NA	YCR051W	chrIII	+	278.174	0.224831	0.168076	1.33767	0.181004	0.861349		278.174	0.340488	0.166919	2.03984	0.0413663	0.625205
CIC1	YHR052W	chrVIII	+	335.992	0.224614	0.15717	1.42911	0.152972	0.806592		335.992	0.160076	0.157311	1.01757	0.30888	0.999182
FRE3	YOR381W	chrXV	+	26.4012	0.224353	0.477971	0.469385	0.638794	0.998763		26.4012	0.0945731	0.480384	0.19687	0.84393	0.999182
SIT4	YDL047W	chrIV	+	134.041	0.224349	0.227877	0.984518	0.324861	0.972559		134.041	0.0655687	0.229206	0.286069	0.774825	0.999182
UME1	YPL139C	chrXVI	-	46.7882	0.224195	0.359114	0.6243	0.53243	0.998763		46.7882	0.00742193	0.362764	0.0204594	0.983677	0.999182
BUD27	YFL023W	chrVI	+	66.2363	0.223842	0.314677	0.711338	0.476875	0.990992		66.2363	0.197204	0.314416	0.627209	0.530522	0.999182
MGT1	YDL200C	chrIV	-	48.3327	0.223723	0.358281	0.624435	0.532342	0.998763		48.3327	-0.297789	0.368396	-0.808338	0.418896	0.999182
TOM22	YNL131W	chrXIV	+	310.639	0.223626	0.158088	1.41456	0.157197	0.814958		310.639	-0.00951899	0.159454	-0.0596975	0.952397	0.999182
NA	YKL066W	chrXI	+	220.718	0.223618	0.18171	1.23063	0.218463	0.899896		220.718	0.0435675	0.18291	0.238191	0.811733	0.999182
RRP15	YPR143W	chrXVI	+	188.335	0.22296	0.19881	1.12148	0.262085	0.939205		188.335	0.0668024	0.199867	0.334234	0.738203	0.999182
AAH1	YNL141W	chrXIV	+	254.004	0.222739	0.183322	1.21501	0.224361	0.902432		254.004	-0.108461	0.185533	-0.584593	0.558822	0.999182
PGI1	YBR196C	chrII	-	1954.3	0.222623	0.112974	1.97057	0.0487734	0.500957		1954.3	0.182321	0.112968	1.61392	0.106545	0.880786
GUA1	YMR217W	chrXIII	+	1047.54	0.222541	0.115469	1.92727	0.0539456	0.523089		1047.54	0.223851	0.11534	1.94079	0.0522839	0.697241
NIT2	YJL126W	chrX	+	37.8441	0.222285	0.39849	0.55782	0.576967	0.998763		37.8441	0.182956	0.398425	0.459198	0.646092	0.999182
HXT3	YDR345C	chrIV	-	3186.54	0.222027	0.113945	1.94855	0.0513494	0.509133		3186.54	0.20346	0.11392	1.78599	0.0741005	0.801378
NSE1	YLR007W	chrXII	+	72.5244	0.221976	0.289789	0.765991	0.443682	0.986476		72.5244	-0.109117	0.294682	-0.370288	0.711168	0.999182
ZEO1	YOL109W	chrXV	+	4112.71	0.221849	0.0940803	2.35809	0.0183694	0.296032		4112.71	0.00852318	0.0942342	0.0904468	0.927932	0.999182
RPN3	YER021W	chrV	+	234.216	0.221456	0.185955	1.19091	0.233689	0.908483		234.216	0.0111991	0.187306	0.0597907	0.952322	0.999182
RRB1	YMR131C	chrXIII	-	336.673	0.221051	0.160113	1.38059	0.167404	0.835705		336.673	0.0341514	0.16105	0.212055	0.832064	0.999182
CDC34	YDR054C	chrIV	-	172.679	0.220837	0.197255	1.11955	0.262905	0.940268		172.679	-0.0141576	0.199247	-0.0710556	0.943354	0.999182
MMS22	YLR320W	chrXII	+	34.7716	0.220671	0.438862	0.502825	0.615088	0.998763		34.7716	0.0453391	0.441918	0.102596	0.918284	0.999182
NNR2	YKL151C	chrXI	-	8020.4	0.220466	0.100123	2.20195	0.0276689	0.375994		8020.4	0.0137853	0.100194	0.137586	0.890568	0.999182
SIP3	YNL257C	chrXIV	-	31.9937	0.220225	0.433647	0.507843	0.611564	0.998763		31.9937	-0.0838	0.440344	-0.190306	0.849069	0.999182
RCM1	YNL022C	chrXIV	-	114.964	0.220195	0.248209	0.887134	0.375007	0.977915		114.964	0.061506	0.249632	0.246387	0.805383	0.999182
CHD1	YER164W	chrV	+	72.3535	0.219351	0.303892	0.721805	0.470414	0.989477		72.3535	0.281619	0.302257	0.93172	0.351481	0.999182
IRC11	YOR013W	chrXV	+	19.1186	0.218875	0.540313	0.405089	0.685412	0.998763		19.1186	-0.406622	0.561256	-0.724485	0.468768	0.999182
MRPL28	YDR462W	chrIV	+	61.9456	0.218631	0.318331	0.686805	0.492206	0.997087		61.9456	-0.200011	0.325204	-0.615032	0.538533	0.999182
YME1	YPR024W	chrXVI	+	108.492	0.218563	0.247224	0.884068	0.37666	0.977915		108.492	0.385524	0.24456	1.57639	0.114935	0.893647
TMA23	YMR269W	chrXIII	+	92.8816	0.218125	0.272284	0.801095	0.423077	0.984362		92.8816	0.102373	0.273293	0.374591	0.707965	0.999182
SAD1	YFR005C	chrVI	-	52.5697	0.217085	0.341491	0.635697	0.524974	0.998763		52.5697	0.0651773	0.343629	0.189674	0.849565	0.999182
SNR79	YNCL0005C	chrXII	-	32.0252	0.217074	0.491038	0.442072	0.658437	0.998763		32.0252	-0.11646	0.497658	-0.234016	0.814973	0.999182
NUP188	YML103C	chrXIII	-	177.055	0.215682	0.19914	1.08306	0.27878	0.949345		177.055	-0.00749704	0.200945	-0.0373089	0.970239	0.999182
NHP10	YDL002C	chrIV	-	86.1978	0.215631	0.272859	0.790266	0.429373	0.984362		86.1978	-0.019617	0.275752	-0.07114	0.943286	0.999182
SNX3	YOR357C	chrXV	-	95.2299	0.215401	0.255818	0.84201	0.399783	0.984362		95.2299	-0.17786	0.260992	-0.681476	0.49557	0.999182
MDM10	YAL010C	chrI	-	40.3766	0.215303	0.40977	0.525424	0.599288	0.998763		40.3766	-0.0721139	0.41502	-0.17376	0.862054	0.999182
MSA1	YOR066W	chrXV	+	43.1042	0.215202	0.381477	0.56413	0.572666	0.998763		43.1042	0.278602	0.379267	0.734581	0.462595	0.999182
NA	YJL150W	chrX	+	29.4504	0.215194	0.446874	0.481554	0.630123	0.998763		29.4504	-0.0957662	0.454144	-0.210872	0.832987	0.999182
MGM101	YJR144W	chrX	+	107.075	0.214932	0.249431	0.861692	0.388857	0.982518		107.075	0.357843	0.247057	1.44842	0.147499	0.966041
UBC11	YOR339C	chrXV	-	261.415	0.21448	0.17561	1.22134	0.221956	0.901764		261.415	0.299685	0.174652	1.71589	0.0861813	0.833898
UBP16	YPL072W	chrXVI	+	15.8946	0.214477	0.601574	0.356526	0.721446	0.998763		15.8946	-0.0393572	0.609393	-0.0645843	0.948505	0.999182
BUD6	YLR319C	chrXII	-	48.5086	0.214346	0.370098	0.57916	0.562482	0.998763		48.5086	0.233743	0.368913	0.633599	0.526343	0.999182
NA	YNL109W	chrXIV	+	9.87297	0.214308	0.774729	0.276623	0.782069	0.998763		9.87297	-0.220995	0.793346	-0.27856	0.780582	0.999182
UBP12	YJL197W	chrX	+	65.9583	0.213691	0.312311	0.684226	0.493832	0.997087		65.9583	-0.0641135	0.316362	-0.202659	0.839402	0.999182
NCS2	YNL119W	chrXIV	+	57.0483	0.213655	0.339828	0.628716	0.529535	0.998763		57.0483	0.513769	0.333833	1.539	0.123805	0.918659
FES1	YBR101C	chrII	-	99.816	0.213535	0.259862	0.821724	0.411234	0.984362		99.816	0.0100733	0.262042	0.0384415	0.969336	0.999182
SIS1	YNL007C	chrXIV	-	105.233	0.213096	0.25095	0.849159	0.395793	0.984362		105.233	-0.00376823	0.253276	-0.014878	0.98813	0.999182
NA	YMR027W	chrXIII	+	138.792	0.213031	0.225996	0.942632	0.345869	0.977915		138.792	-0.047957	0.228459	-0.209915	0.833734	0.999182
ENP2	YGR145W	chrVII	+	153.403	0.212749	0.214695	0.990936	0.321717	0.972559		153.403	0.114757	0.215281	0.533057	0.593994	0.999182
SPE4	YLR146C	chrXII	-	99.1803	0.21257	0.256607	0.828389	0.40745	0.984362		99.1803	0.271494	0.255238	1.06369	0.28747	0.999182
SFA1	YDL168W	chrIV	+	163.306	0.212354	0.204781	1.03698	0.299744	0.965147		163.306	-0.170698	0.208443	-0.818918	0.412833	0.999182
NA	YEL008C-A	chrV	-	20.9314	0.212097	0.519319	0.408414	0.68297	0.998763		20.9314	-0.173619	0.530672	-0.327168	0.743541	0.999182
RSM25	YIL093C	chrIX	-	159.681	0.211677	0.208083	1.01727	0.309024	0.96639		159.681	0.252295	0.207222	1.21751	0.22341	0.999182
PHB2	YGR231C	chrVII	-	224.893	0.21156	0.180198	1.17404	0.240378	0.919731		224.893	-0.117525	0.182722	-0.64319	0.520101	0.999182
MTQ2	YDR140W	chrIV	+	79.1549	0.211495	0.279508	0.75667	0.449247	0.986476		79.1549	0.0916986	0.28073	0.326643	0.743938	0.999182
SAM50	YNL026W	chrXIV	+	47.5851	0.211161	0.357566	0.590552	0.55482	0.998763		47.5851	-0.251577	0.366534	-0.686368	0.492481	0.999182
CIR1	YGR207C	chrVII	-	660.807	0.211051	0.126595	1.66714	0.0954869	0.669676		660.807	0.00181546	0.127294	0.0142619	0.988621	0.999182
COA6	YMR244C-A	chrXIII	-	167.186	0.210562	0.221168	0.952046	0.341074	0.974927		167.186	0.319525	0.21976	1.45397	0.145953	0.959851
MRE11	YMR224C	chrXIII	-	35.428	0.210462	0.42508	0.495111	0.620522	0.998763		35.428	0.581306	0.41576	1.39818	0.16206	0.977274
VIP1	YLR410W	chrXII	+	140.381	0.210347	0.219265	0.959328	0.337393	0.973879		140.381	0.24151	0.218441	1.10561	0.268897	0.999182
CAT2	YML042W	chrXIII	+	21.6041	0.210178	0.513198	0.409545	0.68214	0.998763		21.6041	-0.0273696	0.519426	-0.052692	0.957977	0.999182
BMH2	YDR099W	chrIV	+	435.053	0.210033	0.143018	1.46857	0.141949	0.790553		435.053	-0.0260819	0.144115	-0.18098	0.856384	0.999182
MET4	YNL103W	chrXIV	+	107.547	0.209979	0.249361	0.842069	0.399749	0.984362		107.547	0.139726	0.249721	0.559528	0.575801	0.999182
NA	YJL077W-B	chrX	+	49.3681	0.209935	0.354707	0.591855	0.553948	0.998763		49.3681	-0.113459	0.36043	-0.314788	0.752923	0.999182
TPO1	YLL028W	chrXII	+	99.2452	0.209809	0.259584	0.808253	0.418945	0.984362		99.2452	0.25631	0.258396	0.991926	0.321233	0.999182
BIR1	YJR089W	chrX	+	39.5582	0.209762	0.394038	0.532339	0.594491	0.998763		39.5582	0.135129	0.394762	0.342305	0.732122	0.999182
SPC29	YPL124W	chrXVI	+	21.4592	0.209756	0.585763	0.35809	0.720276	0.998763		21.4592	0.928473	0.565176	1.6428	0.100424	0.863946
DLD1	YDL174C	chrIV	-	195.487	0.20909	0.205764	1.01617	0.309551	0.96639		195.487	-0.457967	0.211599	-2.16431	0.0304405	0.558687
SNR78	YNCM0011W	chrXIII	+	113.551	0.20898	0.260961	0.800808	0.423243	0.984362		113.551	-0.151919	0.264818	-0.573675	0.566188	0.999182
ACL4	YDR161W	chrIV	+	179.657	0.208876	0.198115	1.05432	0.291737	0.95811		179.657	0.0682564	0.199079	0.342862	0.731703	0.999182
PEX21	YGR239C	chrVII	-	120.202	0.208867	0.247793	0.842911	0.399278	0.984362		120.202	0.132501	0.248186	0.533876	0.593428	0.999182
YPK3	YBR028C	chrII	-	38.7216	0.208734	0.417897	0.499486	0.617437	0.998763		38.7216	0.722593	0.406259	1.77865	0.0752968	0.806691
ARP8	YOR141C	chrXV	-	71.2617	0.208703	0.299534	0.69676	0.485953	0.995339		71.2617	-0.226721	0.306193	-0.740451	0.459027	0.999182
CLN2	YPL256C	chrXVI	-	125.804	0.208572	0.227534	0.916665	0.359318	0.977915		125.804	0.244376	0.226593	1.07848	0.280818	0.999182
RRP6	YOR001W	chrXV	+	131.057	0.208511	0.229641	0.907986	0.363885	0.977915		131.057	0.178584	0.229496	0.778156	0.436477	0.999182
UBR1	YGR184C	chrVII	-	127.926	0.208415	0.234035	0.89053	0.373181	0.977915		127.926	0.0223641	0.235718	0.0948762	0.924413	0.999182
COS10	YNR075W	chrXIV	+	51.0691	0.207999	0.350524	0.593395	0.552917	0.998763		51.0691	-0.0961086	0.355725	-0.270177	0.787024	0.999182
TRM8	YDL201W	chrIV	+	236.393	0.20782	0.180005	1.15452	0.248286	0.928394		236.393	0.150795	0.180121	0.837187	0.402487	0.999182
NA	YGL114W	chrVII	+	85.0448	0.207617	0.271186	0.765591	0.44392	0.986476		85.0448	-0.063087	0.274695	-0.229662	0.818355	0.999182
TRM2	YKR056W	chrXI	+	122.861	0.207588	0.235614	0.881054	0.378289	0.97843		122.861	0.271363	0.234351	1.15793	0.246891	0.999182
CAJ1	YER048C	chrV	-	174.477	0.207428	0.198827	1.04326	0.29683	0.962678		174.477	-0.0495312	0.201018	-0.246402	0.805371	0.999182
VTC3	YPL019C	chrXVI	-	416.412	0.206982	0.148872	1.39033	0.164428	0.832751		416.412	0.216953	0.148576	1.46022	0.144231	0.957244
GCG1	YER163C	chrV	-	107.532	0.206937	0.243234	0.850773	0.394895	0.983971		107.532	-0.198565	0.248244	-0.799877	0.423782	0.999182
COF1	YLL050C	chrXII	-	1249.79	0.206796	0.104412	1.98058	0.0476384	0.4948		1249.79	-0.0464205	0.104982	-0.442175	0.658363	0.999182
MIG3	YER028C	chrV	-	93.3425	0.206757	0.263552	0.784502	0.432745	0.984362		93.3425	0.255266	0.262279	0.97326	0.330424	0.999182
SPT4	YGR063C	chrVII	-	204.372	0.206696	0.195084	1.05953	0.289361	0.956539		204.372	0.134672	0.195339	0.689427	0.490555	0.999182
MRX20	YFR045W	chrVI	+	33.0136	0.206688	0.415638	0.497279	0.618992	0.998763		33.0136	-0.64128	0.438308	-1.46308	0.143445	0.954975
MSW1	YDR268W	chrIV	+	33.7075	0.206367	0.412998	0.49968	0.6173	0.998763		33.7075	-0.128851	0.420522	-0.306406	0.759295	0.999182
SMC5	YOL034W	chrXV	+	30.3542	0.206246	0.457559	0.450751	0.652169	0.998763		30.3542	0.432579	0.450961	0.959238	0.337439	0.999182
MTC3	YGL226W	chrVII	+	54.078	0.206115	0.341211	0.604067	0.545799	0.998763		54.078	0.274886	0.339139	0.810543	0.417628	0.999182
RRT14	YIL127C	chrIX	-	159.991	0.206005	0.205474	1.00258	0.316061	0.972219		159.991	0.00701598	0.207152	0.0338688	0.972982	0.999182
UTR2	YEL040W	chrV	+	850.565	0.205822	0.12167	1.69164	0.0907155	0.65611		850.565	0.253364	0.121367	2.08759	0.0368346	0.586993
CSL4	YNL232W	chrXIV	+	168.732	0.205047	0.204753	1.00144	0.316615	0.972219		168.732	0.227867	0.204099	1.11645	0.264228	0.999182
SWI4	YER111C	chrV	-	53.6409	0.204145	0.352873	0.578524	0.562911	0.998763		53.6409	0.482122	0.3471	1.389	0.164833	0.979481
PSR1	YLL010C	chrXII	-	78.1046	0.204128	0.286784	0.711783	0.476599	0.990992		78.1046	0.265586	0.285188	0.931267	0.351716	0.999182
VPS24	YKL041W	chrXI	+	84.7488	0.204012	0.273961	0.744676	0.456467	0.986476		84.7488	-0.0170204	0.276678	-0.061517	0.950947	0.999182
SIP2	YGL208W	chrVII	+	58.9844	0.203612	0.326794	0.62306	0.533245	0.998763		58.9844	0.133401	0.327298	0.407584	0.683579	0.999182
NA	YKR075C	chrXI	-	345.968	0.20338	0.18738	1.08539	0.277751	0.94923		345.968	0.254377	0.186877	1.3612	0.173451	0.992181
SOL4	YGR248W	chrVII	+	11.3759	0.203347	0.690451	0.294514	0.768365	0.998763		11.3759	-1.292	0.772539	-1.67241	0.0944433	0.853571
FET5	YFL041W	chrVI	+	84.0974	0.202911	0.298095	0.680692	0.496066	0.997087		84.0974	0.17636	0.297871	0.592069	0.553804	0.999182
MAD2	YJL030W	chrX	+	53.2364	0.202641	0.331231	0.611782	0.540682	0.998763		53.2364	-0.314538	0.341097	-0.922137	0.356457	0.999182
NAB3	YPL190C	chrXVI	-	139.096	0.202608	0.233072	0.869294	0.384686	0.979867		139.096	-0.0647136	0.235533	-0.274754	0.783505	0.999182
SAC7	YDR389W	chrIV	+	80.0547	0.202588	0.289581	0.699591	0.484183	0.994045		80.0547	0.29688	0.287556	1.03243	0.301873	0.999182
CTF4	YPR135W	chrXVI	+	45.8735	0.202169	0.365582	0.553006	0.580259	0.998763		45.8735	0.0859027	0.367126	0.233987	0.814995	0.999182
GPM1	YKL152C	chrXI	-	8428	0.202136	0.0975518	2.07209	0.0382573	0.45035		8428	-0.00582924	0.0976221	-0.0597123	0.952385	0.999182
BXI1	YNL305C	chrXIV	-	77.3514	0.201811	0.285885	0.705916	0.48024	0.991861		77.3514	-0.568843	0.298486	-1.90577	0.0566807	0.713213
DUO1	YGL061C	chrVII	-	32.7753	0.201696	0.436184	0.462411	0.643787	0.998763		32.7753	0.120567	0.437129	0.275815	0.78269	0.999182
FLO1	YAR050W	chrI	+	91.9028	0.201465	0.466837	0.431553	0.666067	0.998763		91.9028	0.1259	0.467091	0.26954	0.787514	0.999182
NA	YLR434C	chrXII	-	23.9405	0.201335	0.524644	0.383755	0.70116	0.998763		23.9405	0.129904	0.525449	0.247224	0.804735	0.999182
RAM2	YKL019W	chrXI	+	100.596	0.201263	0.253233	0.794771	0.426747	0.984362		100.596	0.0669019	0.254499	0.262877	0.792646	0.999182
IPI3	YNL182C	chrXIV	-	146.231	0.201024	0.219341	0.91649	0.35941	0.977915		146.231	-0.0226285	0.221336	-0.102236	0.918569	0.999182
SRP40	YKR092C	chrXI	-	407.801	0.200885	0.150151	1.33789	0.180931	0.861349		407.801	0.165985	0.150103	1.1058	0.268812	0.999182
PET309	YLR067C	chrXII	-	31.3221	0.200783	0.458569	0.437847	0.661497	0.998763		31.3221	-0.0465015	0.463631	-0.100299	0.920107	0.999182
MRPL36	YBR122C	chrII	-	127.287	0.200734	0.227101	0.883898	0.376751	0.977915		127.287	0.0656331	0.228225	0.287581	0.773668	0.999182
PUS9	YDL036C	chrIV	-	49.8227	0.200731	0.359576	0.558242	0.576679	0.998763		49.8227	0.213983	0.358503	0.59688	0.550587	0.999182
HSP150	YJL159W	chrX	+	4769.3	0.200624	0.100798	1.99035	0.0465521	0.490469		4769.3	0.000521041	0.100912	0.0051633	0.99588	0.999182
GYL1	YMR192W	chrXIII	+	99.5066	0.200469	0.260991	0.768107	0.442424	0.986476		99.5066	-0.00114242	0.26315	-0.00434132	0.996536	0.999182
CUR1	YPR158W	chrXVI	+	19.6095	0.20034	0.568741	0.352251	0.72465	0.998763		19.6095	0.437853	0.56017	0.781644	0.434424	0.999182
BSC6	YOL137W	chrXV	+	54.5887	0.200254	0.347058	0.577004	0.563937	0.998763		54.5887	0.193171	0.346412	0.557633	0.577095	0.999182
FUM1	YPL262W	chrXVI	+	260.331	0.200146	0.17267	1.15913	0.246405	0.927424		260.331	-0.0682729	0.174455	-0.39135	0.695539	0.999182
TSA1	YML028W	chrXIII	+	3339.46	0.199926	0.099016	2.01913	0.0434739	0.478297		3339.46	0.0778766	0.0990982	0.785853	0.431954	0.999182
OCA1	YNL099C	chrXIV	-	64.2996	0.199767	0.310956	0.642427	0.520596	0.998763		64.2996	0.233283	0.309647	0.753382	0.45122	0.999182
PCA1	YBR295W	chrII	+	157.956	0.199734	0.227772	0.876903	0.380539	0.978798		157.956	-0.147923	0.230814	-0.640878	0.521602	0.999182
SAS4	YDR181C	chrIV	-	38.6504	0.199431	0.398479	0.500479	0.616738	0.998763		38.6504	0.178893	0.397992	0.44949	0.653078	0.999182
NA	YJL086C	chrX	-	10.8	0.19915	0.745258	0.267222	0.789298	0.998763		10.8	0.590394	0.726929	0.812175	0.416691	0.999182
NPP1	YCR026C	chrIII	-	86.6717	0.199031	0.27391	0.726631	0.467452	0.987067		86.6717	0.0830986	0.274993	0.302185	0.762511	0.999182
VMA13	YPR036W	chrXVI	+	481.702	0.198712	0.135057	1.47132	0.141205	0.790504		481.702	-0.0400138	0.136124	-0.293951	0.768795	0.999182
AIP5	YFR016C	chrVI	-	61.9784	0.198611	0.33622	0.590719	0.554709	0.998763		61.9784	0.0453134	0.338088	0.134028	0.89338	0.999182
RPA135	YPR010C	chrXVI	-	652.893	0.198515	0.134154	1.47975	0.138939	0.787673		652.893	0.264983	0.133721	1.98162	0.0475223	0.669643
VPS34	YLR240W	chrXII	+	41.5409	0.198067	0.414745	0.477564	0.632961	0.998763		41.5409	-0.0609775	0.419199	-0.145462	0.884346	0.999182
FMP10	YER182W	chrV	+	46.1236	0.198057	0.357309	0.554301	0.579373	0.998763		46.1236	0.0237071	0.360131	0.0658291	0.947514	0.999182
CHM7	YJL049W	chrX	+	31.7006	0.197776	0.426464	0.463757	0.642822	0.998763		31.7006	-0.0405654	0.431605	-0.0939874	0.925119	0.999182
STE12	YHR084W	chrVIII	+	82.4151	0.197357	0.279437	0.706269	0.480021	0.991765		82.4151	0.168389	0.279235	0.603035	0.546485	0.999182
SEN34	YAR008W	chrI	+	36.1129	0.197336	0.4145	0.476082	0.634016	0.998763		36.1129	0.189456	0.413704	0.457952	0.646987	0.999182
SPE1	YKL184W	chrXI	+	209.318	0.197051	0.191201	1.03059	0.302731	0.965936		209.318	0.0934756	0.191732	0.487532	0.625882	0.999182
RCO1	YMR075W	chrXIII	+	49.0539	0.196984	0.350552	0.561926	0.574166	0.998763		49.0539	0.287187	0.347903	0.825479	0.4091	0.999182
NA	YML100W-A	chrXIII	+	70.3683	0.196924	0.300824	0.654616	0.512715	0.998763		70.3683	0.142606	0.301021	0.473742	0.635684	0.999182
AIM22	YJL046W	chrX	+	31.7921	0.196845	0.440907	0.446456	0.655268	0.998763		31.7921	-0.22756	0.450778	-0.504815	0.613689	0.999182
AFB1	YLR040C	chrXII	-	599.239	0.196732	0.133715	1.47128	0.141216	0.790504		599.239	0.0790817	0.13404	0.589987	0.555199	0.999182
CEM1	YER061C	chrV	-	97.7775	0.196573	0.262088	0.750026	0.453239	0.986476		97.7775	-0.022396	0.26452	-0.0846663	0.932527	0.999182
FTH1	YBR207W	chrII	+	131.515	0.196325	0.241276	0.813693	0.415821	0.984362		131.515	0.25707	0.240152	1.07045	0.284418	0.999182
ARI1	YGL157W	chrVII	+	180.719	0.196303	0.194006	1.01184	0.311615	0.969014		180.719	-0.296436	0.198709	-1.49181	0.135748	0.946007
WSC3	YOL105C	chrXV	-	79.9961	0.196016	0.281855	0.69545	0.486774	0.99565		79.9961	0.208424	0.281015	0.741683	0.45828	0.999182
NSA2	YER126C	chrV	-	261.298	0.195807	0.169257	1.15686	0.247329	0.928394		261.298	0.214381	0.168778	1.2702	0.204014	0.999182
RPT4	YOR259C	chrXV	-	199.507	0.195309	0.18755	1.04137	0.297704	0.963223		199.507	-0.135356	0.19031	-0.711238	0.476937	0.999182
LYS14	YDR034C	chrIV	-	87.9277	0.195251	0.269141	0.725461	0.468169	0.987609		87.9277	0.0657519	0.270433	0.243136	0.8079	0.999182
ELP3	YPL086C	chrXVI	-	138.391	0.195171	0.217681	0.896591	0.369937	0.977915		138.391	-0.113628	0.220842	-0.514519	0.606889	0.999182
RPA43	YOR340C	chrXV	-	265.902	0.195154	0.173091	1.12747	0.259546	0.938204		265.902	0.262658	0.172263	1.52475	0.127322	0.926852
NOP4	YPL043W	chrXVI	+	228.292	0.194834	0.189035	1.03067	0.302694	0.965936		228.292	0.209291	0.188575	1.10985	0.267062	0.999182
UIP3	YAR027W	chrI	+	85.2849	0.194683	0.281122	0.69252	0.488611	0.996033		85.2849	-0.127886	0.285304	-0.448246	0.653976	0.999182
IOC2	YLR095C	chrXII	-	40.6431	0.194447	0.396156	0.490833	0.623544	0.998763		40.6431	0.495067	0.388904	1.27298	0.203024	0.999182
DGA1	YOR245C	chrXV	-	46.6194	0.19424	0.357118	0.54391	0.586504	0.998763		46.6194	-0.171745	0.364106	-0.471691	0.637148	0.999182
SMC6	YLR383W	chrXII	+	42.8207	0.19411	0.403138	0.481499	0.630162	0.998763		42.8207	0.210148	0.401962	0.522807	0.601108	0.999182
SSN2	YDR443C	chrIV	-	42.7101	0.193893	0.382458	0.506965	0.612179	0.998763		42.7101	-0.0402379	0.386616	-0.104077	0.917108	0.999182
HEM13	YDR044W	chrIV	+	135.873	0.193804	0.232861	0.832275	0.405254	0.984362		135.873	0.0697489	0.233763	0.298375	0.765417	0.999182
NA	YHR131C	chrVIII	-	51.4053	0.193629	0.365123	0.530313	0.595895	0.998763		51.4053	-0.0733842	0.369374	-0.198672	0.842519	0.999182
BCY1	YIL033C	chrIX	-	172.936	0.193357	0.206181	0.9378	0.348347	0.977915		172.936	-0.0729283	0.208411	-0.349925	0.726395	0.999182
TKL1	YPR074C	chrXVI	-	1255.03	0.193204	0.114439	1.68827	0.091359	0.659098		1255.03	0.229817	0.114245	2.01162	0.0442601	0.653771
RRT2	YBR246W	chrII	+	96.9753	0.192942	0.256479	0.75227	0.451889	0.986476		96.9753	0.195458	0.255854	0.763944	0.444901	0.999182
PRE4	YFR050C	chrVI	-	269.631	0.192592	0.166693	1.15537	0.247939	0.928394		269.631	-0.112295	0.168779	-0.665341	0.505833	0.999182
NOP16	YER002W	chrV	+	277.144	0.192584	0.167492	1.14981	0.250222	0.928955		277.144	0.161401	0.167405	0.964137	0.334977	0.999182
PSY4	YBL046W	chrII	+	53.2839	0.191811	0.344513	0.556762	0.57769	0.998763		53.2839	-0.191074	0.351202	-0.544057	0.586403	0.999182
MRL1	YPR079W	chrXVI	+	56.8931	0.191747	0.328999	0.58282	0.560015	0.998763		56.8931	-0.196955	0.33568	-0.586732	0.557384	0.999182
FIN1	YDR130C	chrIV	-	111.361	0.19139	0.278106	0.68819	0.491333	0.996828		111.361	0.212238	0.27739	0.765125	0.444197	0.999182
RSM22	YKL155C	chrXI	-	39.4557	0.191245	0.404681	0.472581	0.636512	0.998763		39.4557	-0.0357128	0.408776	-0.0873651	0.930381	0.999182
PUF6	YDR496C	chrIV	-	300.457	0.191195	0.160566	1.19075	0.233751	0.908483		300.457	0.165627	0.160442	1.03232	0.301924	0.999182
YFH1	YDL120W	chrIV	+	111.079	0.190974	0.24026	0.794866	0.426692	0.984362		111.079	0.139114	0.240384	0.578715	0.562782	0.999182
DDI1	YER143W	chrV	+	50.6227	0.190845	0.343625	0.555388	0.578629	0.998763		50.6227	-0.21955	0.351289	-0.624984	0.531982	0.999182
SPB4	YFL002C	chrVI	-	112.104	0.190839	0.240128	0.794739	0.426765	0.984362		112.104	-0.0170542	0.242302	-0.070384	0.943888	0.999182
RPA14	YDR156W	chrIV	+	327.491	0.190746	0.162359	1.17484	0.240059	0.919731		327.491	0.122165	0.162527	0.751663	0.452254	0.999182
VPS64	YDR200C	chrIV	-	45.8263	0.190718	0.361363	0.527775	0.597656	0.998763		45.8263	-0.160369	0.368067	-0.435706	0.66305	0.999182
CDC33	YOL139C	chrXV	-	984.569	0.190716	0.113473	1.68073	0.0928161	0.664542		984.569	0.232238	0.113209	2.05141	0.0402266	0.620314
STS1	YIR011C	chrIX	-	139.746	0.19066	0.221161	0.862088	0.388639	0.982503		139.746	0.0217146	0.222602	0.0975493	0.92229	0.999182
NA	YMR315W-A	chrXIII	+	49.8175	0.190644	0.356373	0.534958	0.592679	0.998763		49.8175	0.0353621	0.358609	0.0986091	0.921449	0.999182
MET31	YPL038W	chrXVI	+	44.9256	0.190535	0.378827	0.50296	0.614992	0.998763		44.9256	0.354444	0.374668	0.946022	0.344137	0.999182
NA	YDR157W	chrIV	+	318.022	0.190216	0.165855	1.14688	0.25143	0.92931		318.022	0.129804	0.165969	0.782099	0.434157	0.999182
HCS1	YKL017C	chrXI	-	33.8925	0.190181	0.42025	0.452544	0.650877	0.998763		33.8925	0.048378	0.422708	0.114448	0.908883	0.999182
YKE2	YLR200W	chrXII	+	147.637	0.189833	0.222125	0.854624	0.392759	0.983851		147.637	-0.0956399	0.224766	-0.425509	0.670466	0.999182
NA	YDR042C	chrIV	-	80.1394	0.189219	0.303782	0.622878	0.533364	0.998763		80.1394	0.626591	0.297083	2.10914	0.0349324	0.585257
TRS85	YDR108W	chrIV	+	41.7841	0.189052	0.380204	0.49724	0.61902	0.998763		41.7841	0.283501	0.37724	0.751513	0.452344	0.999182
GCD14	YJL125C	chrX	-	97.7383	0.188968	0.258786	0.730209	0.465263	0.986476		97.7383	0.258382	0.257261	1.00436	0.315207	0.999182
RRG9	YNL213C	chrXIV	-	55.2473	0.188848	0.336783	0.560742	0.574973	0.998763		55.2473	0.0987586	0.337681	0.292461	0.769934	0.999182
ATP14	YLR295C	chrXII	-	194.319	0.188629	0.189759	0.994045	0.320201	0.972559		194.319	0.0346738	0.190823	0.181707	0.855813	0.999182
SMX2	YFL017W-A	chrVI	+	81.8413	0.18855	0.278356	0.67737	0.498171	0.997087		81.8413	0.178471	0.277865	0.642294	0.520682	0.999182
FUR1	YHR128W	chrVIII	+	464.222	0.188284	0.14651	1.28513	0.198748	0.880058		464.222	0.0916227	0.146785	0.624198	0.532498	0.999182
MAS2	YHR024C	chrVIII	-	144.937	0.188152	0.213209	0.882476	0.377519	0.97843		144.937	-0.0864454	0.215888	-0.400417	0.688849	0.999182
PCL2	YDL127W	chrIV	+	61.9124	0.188041	0.31536	0.596273	0.550993	0.998763		61.9124	0.160594	0.315097	0.509665	0.610286	0.999182
BUL2	YML111W	chrXIII	+	78.7645	0.187835	0.296324	0.633883	0.526157	0.998763		78.7645	0.0649027	0.297533	0.218136	0.827323	0.999182
SUA7	YPR086W	chrXVI	+	198.492	0.187726	0.19166	0.979477	0.327344	0.972559		198.492	-0.0657214	0.193633	-0.339413	0.734299	0.999182
NUP53	YMR153W	chrXIII	+	62.429	0.187358	0.311308	0.601841	0.54728	0.998763		62.429	-0.0151397	0.314223	-0.0481815	0.961572	0.999182
STT4	YLR305C	chrXII	-	121.224	0.187347	0.23744	0.789028	0.430096	0.984362		121.224	-0.0406823	0.239727	-0.169703	0.865244	0.999182
TIM50	YPL063W	chrXVI	+	183.368	0.187316	0.197824	0.946883	0.343698	0.977915		183.368	-0.118897	0.200428	-0.593217	0.553036	0.999182
SAW1	YAL027W	chrI	+	33.791	0.187094	0.424735	0.440497	0.659577	0.998763		33.791	-0.245342	0.434627	-0.564489	0.572422	0.999182
CHS3	YBR023C	chrII	-	286.542	0.187046	0.180678	1.03524	0.300555	0.965455		286.542	0.0831779	0.181089	0.45932	0.646004	0.999182
SED5	YLR026C	chrXII	-	65.9223	0.186862	0.30729	0.608097	0.543123	0.998763		65.9223	0.249858	0.305494	0.81788	0.413426	0.999182
SUM1	YDR310C	chrIV	-	81.7888	0.186556	0.281351	0.663073	0.507284	0.998763		81.7888	-0.156618	0.286045	-0.547528	0.584016	0.999182
NA	YPR204W	chrXVI	+	50.1188	0.186368	0.358157	0.520353	0.602818	0.998763		50.1188	0.195096	0.357169	0.546228	0.584909	0.999182
CDC37	YDR168W	chrIV	+	145.259	0.186313	0.217443	0.856834	0.391536	0.983851		145.259	-0.243259	0.2219	-1.09626	0.272966	0.999182
FYV5	YCL058C	chrIII	-	192.087	0.186196	0.197795	0.941361	0.34652	0.977915		192.087	0.180913	0.197452	0.916238	0.359542	0.999182
IGD1	YFR017C	chrVI	-	194.059	0.185986	0.195132	0.95313	0.340524	0.974761		194.059	-0.00923502	0.196557	-0.046984	0.962526	0.999182
RBK1	YCR036W	chrIII	+	150.559	0.185872	0.209959	0.885276	0.376008	0.977915		150.559	0.00320382	0.211525	0.0151463	0.987915	0.999182
NA	YLR294C	chrXII	-	193.49	0.185419	0.190414	0.973767	0.330172	0.972559		193.49	0.0308996	0.191484	0.161369	0.871803	0.999182
MHO1	YJR008W	chrX	+	44.8208	0.185379	0.369552	0.501631	0.615927	0.998763		44.8208	-0.608173	0.386995	-1.57153	0.11606	0.893647
DPM1	YPR183W	chrXVI	+	437.652	0.185327	0.145496	1.27376	0.202748	0.886856		437.652	0.185424	0.14526	1.2765	0.20178	0.999182
NUT2	YPR168W	chrXVI	+	126.017	0.18494	0.234318	0.789268	0.429955	0.984362		126.017	0.0782904	0.235079	0.333038	0.739106	0.999182
UTP11	YKL099C	chrXI	-	119.224	0.184674	0.2507	0.736634	0.461345	0.986476		119.224	0.321784	0.248628	1.29424	0.195583	0.999182
POL4	YCR014C	chrIII	-	27.8889	0.184333	0.483219	0.38147	0.702855	0.998763		27.8889	0.000474722	0.486928	0.000974933	0.999222	0.999741
PPT2	YPL148C	chrXVI	-	25.3306	0.184117	0.495829	0.371331	0.710391	0.998763		25.3306	0.374769	0.489453	0.76569	0.443861	0.999182
DSF1	YEL070W	chrV	+	11.9206	0.183725	0.678129	0.270929	0.786446	0.998763		11.9206	-0.842977	0.726967	-1.15958	0.246219	0.999182
CDC6	YJL194W	chrX	+	21.563	0.183669	0.556732	0.329905	0.741472	0.998763		21.563	0.898838	0.535174	1.67953	0.0930497	0.850379
RRG8	YPR116W	chrXVI	+	27.2956	0.183636	0.467095	0.393144	0.694213	0.998763		27.2956	-0.155935	0.475487	-0.327948	0.742951	0.999182
RIM20	YOR275C	chrXV	-	50.5012	0.183419	0.37045	0.495124	0.620512	0.998763		50.5012	0.168278	0.369942	0.454875	0.649199	0.999182
SNC2	YOR327C	chrXV	-	339.991	0.183263	0.164504	1.11403	0.265267	0.941683		339.991	0.0293088	0.165202	0.177412	0.859185	0.999182
SWC5	YBR231C	chrII	-	48.3007	0.18322	0.352346	0.519998	0.603065	0.998763		48.3007	0.14407	0.352286	0.408957	0.682571	0.999182
PAC2	YER007W	chrV	+	18.565	0.183188	0.547024	0.334882	0.737714	0.998763		18.565	-0.504193	0.570996	-0.883006	0.377233	0.999182
MMO1	YKL044W	chrXI	+	27.8961	0.182856	0.493427	0.370584	0.710947	0.998763		27.8961	0.366783	0.487799	0.751915	0.452102	0.999182
SIZ1	YDR409W	chrIV	+	29.9079	0.182614	0.44894	0.406768	0.684179	0.998763		29.9079	0.248071	0.446172	0.555998	0.578212	0.999182
BGL2	YGR282C	chrVII	-	2311.81	0.182488	0.0972175	1.87711	0.0605028	0.549423		2311.81	0.0540933	0.0973493	0.555662	0.578442	0.999182
INM2	YDR287W	chrIV	+	97.3475	0.182245	0.257043	0.709003	0.478322	0.991598		97.3475	-0.108489	0.260594	-0.416313	0.677181	0.999182
ISW1	YBR245C	chrII	-	95.6686	0.182062	0.261623	0.695894	0.486495	0.99565		95.6686	0.240533	0.260229	0.924312	0.355324	0.999182
COX16	YJL003W	chrX	+	50.4847	0.181926	0.344875	0.527513	0.597837	0.998763		50.4847	0.0240668	0.347215	0.0693137	0.94474	0.999182
PET9	YBL030C	chrII	-	777.692	0.181843	0.119822	1.5176	0.129114	0.756052		777.692	0.104761	0.119949	0.873382	0.382455	0.999182
EFM2	YBR271W	chrII	+	75.7191	0.181752	0.300118	0.6056	0.54478	0.998763		75.7191	0.120261	0.30041	0.400323	0.688918	0.999182
SEI1	YLR404W	chrXII	+	37.5397	0.181716	0.401549	0.452537	0.650882	0.998763		37.5397	0.368433	0.396339	0.929589	0.352584	0.999182
NA	YBR027C	chrII	-	46.3029	0.18163	0.370212	0.490611	0.623701	0.998763		46.3029	0.344961	0.366091	0.942281	0.346049	0.999182
NA	YGR269W	chrVII	+	10.1711	0.18128	0.742703	0.244081	0.807168	0.998763		10.1711	-0.30037	0.764041	-0.393133	0.694221	0.999182
GPN3	YLR243W	chrXII	+	120.853	0.181272	0.236247	0.767299	0.442904	0.986476		120.853	-0.0185419	0.238199	-0.0778421	0.937954	0.999182
NA	YNL208W	chrXIV	+	968.081	0.181157	0.126478	1.43232	0.152052	0.804708		968.081	-0.033349	0.126973	-0.262646	0.792824	0.999182
MDR1	YGR100W	chrVII	+	58.3905	0.181114	0.323692	0.559526	0.575803	0.998763		58.3905	-0.0978205	0.328164	-0.298084	0.765639	0.999182
RCK1	YGL158W	chrVII	+	26.8585	0.180763	0.521705	0.346484	0.728979	0.998763		26.8585	0.113994	0.522305	0.218251	0.827233	0.999182
SHP1	YBL058W	chrII	+	132.467	0.180743	0.227475	0.794563	0.426868	0.984362		132.467	0.00935817	0.228985	0.0408681	0.967401	0.999182
SNR54	YNCM0005C	chrXIII	-	546.611	0.180701	0.150522	1.2005	0.229946	0.905636		546.611	0.506897	0.148992	3.40217	0.000668522	0.0683096
PMS1	YNL082W	chrXIV	+	24.4802	0.180484	0.488756	0.369272	0.711925	0.998763		24.4802	-0.022221	0.493504	-0.0450271	0.964086	0.999182
SMY2	YBR172C	chrII	-	135.074	0.179423	0.221642	0.80952	0.418216	0.984362		135.074	0.2068	0.220832	0.936454	0.349039	0.999182
GIS3	YLR094C	chrXII	-	96.3503	0.179176	0.26536	0.675218	0.499537	0.997087		96.3503	0.126148	0.265504	0.475126	0.634697	0.999182
YNK1	YKL067W	chrXI	+	228.065	0.178735	0.177134	1.00904	0.312955	0.969444		228.065	-0.0353446	0.17864	-0.197854	0.84316	0.999182
GPB1	YOR371C	chrXV	-	37.2054	0.178698	0.413754	0.431895	0.665817	0.998763		37.2054	0.141469	0.413639	0.34201	0.732343	0.999182
UBX7	YBR273C	chrII	-	82.9103	0.178218	0.273409	0.651836	0.514507	0.998763		82.9103	-0.118037	0.27742	-0.425482	0.670485	0.999182
OTU1	YFL044C	chrVI	-	681.155	0.177831	0.122686	1.44948	0.147204	0.797846		681.155	0.121356	0.122741	0.988713	0.322803	0.999182
ARP7	YPR034W	chrXVI	+	59.9504	0.177667	0.32583	0.545275	0.585565	0.998763		59.9504	0.44567	0.320391	1.39102	0.16422	0.979481
RKM3	YBR030W	chrII	+	52.2228	0.177597	0.342192	0.518997	0.603763	0.998763		52.2228	0.297345	0.339066	0.876954	0.380512	0.999182
NA	YDR215C	chrIV	-	10.5768	0.177534	0.740516	0.239744	0.810529	0.998763		10.5768	-0.0564469	0.749213	-0.0753416	0.939943	0.999182
OCA4	YCR095C	chrIII	-	41.6044	0.177425	0.383502	0.462646	0.643618	0.998763		41.6044	0.0594295	0.385171	0.154294	0.877378	0.999182
COQ6	YGR255C	chrVII	-	66.844	0.177343	0.299154	0.592817	0.553303	0.998763		66.844	-0.428178	0.309675	-1.38267	0.166766	0.980097
FRQ1	YDR373W	chrIV	+	168.158	0.177222	0.201822	0.87811	0.379884	0.978689		168.158	0.0688732	0.202503	0.34011	0.733774	0.999182
SHU2	YDR078C	chrIV	-	26.2652	0.176981	0.482842	0.36654	0.713963	0.998763		26.2652	0.3585	0.476783	0.751914	0.452103	0.999182
RPT5	YOR117W	chrXV	+	208.779	0.17597	0.183997	0.956375	0.338883	0.974761		208.779	-0.0526159	0.18572	-0.283307	0.776941	0.999182
FRE7	YOL152W	chrXV	+	55.5889	0.175811	0.348372	0.504664	0.613795	0.998763		55.5889	-0.174869	0.354126	-0.493804	0.621444	0.999182
SOM1	YEL059C-A	chrV	-	103.727	0.175457	0.258294	0.679293	0.496952	0.997087		103.727	0.232094	0.257011	0.903048	0.366501	0.999182
UBC12	YLR306W	chrXII	+	33.617	0.175327	0.425558	0.411993	0.680344	0.998763		33.617	0.181981	0.424372	0.428825	0.668051	0.999182
NOP13	YNL175C	chrXIV	-	264.764	0.174879	0.170083	1.0282	0.303854	0.966057		264.764	0.229648	0.169332	1.3562	0.175034	0.992181
BNA6	YFR047C	chrVI	-	180.775	0.174691	0.198821	0.878634	0.3796	0.978689		180.775	-0.117083	0.201305	-0.581619	0.560824	0.999182
YEA4	YEL004W	chrV	+	188.356	0.174648	0.206842	0.844356	0.39847	0.984362		188.356	0.212556	0.206122	1.03121	0.302441	0.999182
CMI8	YDR461C-A	chrIV	-	22.2247	0.17439	0.507408	0.343688	0.731081	0.998763		22.2247	0.0419057	0.510232	0.0821307	0.934543	0.999182
STP2	YHR006W	chrVIII	+	100.311	0.174224	0.257683	0.67612	0.498965	0.997087		100.311	0.10912	0.257989	0.422964	0.672322	0.999182
ADH6	YMR318C	chrXIII	-	564.986	0.174212	0.150646	1.15644	0.247503	0.928394		564.986	0.0732926	0.150882	0.485762	0.627136	0.999182
NA	YIL141W	chrIX	+	48.1533	0.174121	0.364201	0.47809	0.632586	0.998763		48.1533	0.670131	0.353721	1.89452	0.0581563	0.720459
LTV1	YKL143W	chrXI	+	343.911	0.173912	0.153758	1.13108	0.258023	0.93605		343.911	-0.12088	0.155469	-0.777522	0.436851	0.999182
GCY1	YOR120W	chrXV	+	45.5495	0.173595	0.35984	0.482423	0.629506	0.998763		45.5495	-0.38946	0.371648	-1.04793	0.294673	0.999182
HRB1	YNL004W	chrXIV	+	139.769	0.173552	0.237068	0.732077	0.464122	0.986476		139.769	0.219495	0.236138	0.929521	0.352619	0.999182
NHX1	YDR456W	chrIV	+	84.4725	0.173304	0.27783	0.623775	0.532775	0.998763		84.4725	0.263838	0.275871	0.956381	0.33888	0.999182
OPY2	YPR075C	chrXVI	-	95.0309	0.173111	0.272579	0.635085	0.525373	0.998763		95.0309	0.0837411	0.273212	0.306506	0.75922	0.999182
AIM25	YJR100C	chrX	-	43.8739	0.172957	0.367012	0.471258	0.637456	0.998763		43.8739	-0.0791478	0.371664	-0.212955	0.831362	0.999182
SIA1	YOR137C	chrXV	-	61.3344	0.172733	0.314265	0.549641	0.582566	0.998763		61.3344	-0.129287	0.319098	-0.405165	0.685356	0.999182
ECM5	YMR176W	chrXIII	+	54.2228	0.172499	0.334645	0.515469	0.606225	0.998763		54.2228	0.07358	0.335744	0.219155	0.826529	0.999182
TIS11	YLR136C	chrXII	-	79.0711	0.1722	0.590841	0.29145	0.770707	0.998763		79.0711	0.500731	0.588127	0.851398	0.394548	0.999182
ARO10	YDR380W	chrIV	+	9.0541	0.172017	0.786143	0.218812	0.826797	0.998763		9.0541	-0.607943	0.825896	-0.736102	0.461669	0.999182
TIR3	YIL011W	chrIX	+	28.395	0.171999	0.456068	0.377134	0.706074	0.998763		28.395	0.108997	0.456634	0.238697	0.811341	0.999182
HXK2	YGL253W	chrVII	+	1406.58	0.171868	0.102965	1.6692	0.0950784	0.668822		1406.58	0.249547	0.102674	2.43048	0.0150788	0.393684
PHD1	YKL043W	chrXI	+	35.8334	0.171745	0.434009	0.395717	0.692314	0.998763		35.8334	0.384295	0.428391	0.897065	0.369684	0.999182
UBX5	YDR330W	chrIV	+	44.7802	0.171634	0.366863	0.467843	0.639897	0.998763		44.7802	-0.25207	0.375322	-0.67161	0.501832	0.999182
LAT1	YNL071W	chrXIV	+	735.427	0.171608	0.119463	1.4365	0.15086	0.804708		735.427	0.0845396	0.119637	0.706635	0.479794	0.999182
GPX1	YKL026C	chrXI	-	40.348	0.171359	0.383923	0.446337	0.655354	0.998763		40.348	-0.56855	0.401149	-1.4173	0.156394	0.971508
HAA1	YPR008W	chrXVI	+	116.771	0.171173	0.236412	0.724045	0.469038	0.988713		116.771	-0.229367	0.24113	-0.951215	0.341495	0.999182
NA	YPR169W-A	chrXVI	+	510.397	0.170783	0.154557	1.10499	0.269165	0.941683		510.397	0.39697	0.153384	2.58808	0.00965117	0.324442
GPR1	YDL035C	chrIV	-	95.1006	0.170779	0.255867	0.667451	0.504484	0.998763		95.1006	-0.0316405	0.258203	-0.122541	0.90247	0.999182
RPB10	YOR210W	chrXV	+	359.156	0.170575	0.155775	1.09501	0.273513	0.943093		359.156	0.0735485	0.156114	0.471122	0.637554	0.999182
FUN30	YAL019W	chrI	+	129.462	0.170548	0.236822	0.720154	0.47143	0.989744		129.462	-0.116451	0.23968	-0.48586	0.627066	0.999182
NA	YFR009W-A	chrVI	+	229.231	0.170454	0.186882	0.912097	0.361718	0.977915		229.231	-0.00239153	0.187956	-0.0127239	0.989848	0.999182
ACF4	YJR083C	chrX	-	75.935	0.170363	0.295031	0.577442	0.563641	0.998763		75.935	-0.0649822	0.298101	-0.217987	0.827439	0.999182
JJJ1	YNL227C	chrXIV	-	53.7877	0.169687	0.33074	0.513054	0.607913	0.998763		53.7877	-0.219791	0.337823	-0.650609	0.515299	0.999182
RRD2	YPL152W	chrXVI	+	28.5339	0.169429	0.471177	0.359587	0.719156	0.998763		28.5339	0.356201	0.465299	0.765532	0.443955	0.999182
PHO90	YJL198W	chrX	+	174.026	0.169331	0.197659	0.856683	0.39162	0.983851		174.026	0.0546931	0.198397	0.275675	0.782798	0.999182
ATP3	YBR039W	chrII	+	196.299	0.169267	0.194957	0.86823	0.385268	0.979867		196.299	0.0535406	0.195629	0.273685	0.784327	0.999182
MSS2	YDL107W	chrIV	+	24.3741	0.169182	0.524907	0.322308	0.74722	0.998763		24.3741	0.120488	0.525078	0.229467	0.818506	0.999182
PAM17	YKR065C	chrXI	-	160.853	0.168949	0.203479	0.8303	0.406369	0.984362		160.853	0.0760761	0.204021	0.372884	0.709235	0.999182
NBP2	YDR162C	chrIV	-	77.4076	0.168878	0.282438	0.597927	0.549888	0.998763		77.4076	-0.120466	0.286492	-0.420486	0.674131	0.999182
PDB1	YBR221C	chrII	-	670.205	0.168843	0.122657	1.37655	0.168652	0.837552		670.205	0.128644	0.122644	1.04892	0.294213	0.999182
MCD1	YDL003W	chrIV	+	44.5267	0.168759	0.369216	0.457074	0.647618	0.998763		44.5267	0.296661	0.36564	0.811347	0.417166	0.999182
GLO1	YML004C	chrXIII	-	199.368	0.168494	0.185865	0.906539	0.364651	0.977915		199.368	-0.234576	0.189408	-1.23847	0.215542	0.999182
MTQ1	YNL063W	chrXIV	+	29.3924	0.168429	0.446988	0.376809	0.706315	0.998763		29.3924	-0.199055	0.455935	-0.436587	0.662411	0.999182
PFU1	YDR306C	chrIV	-	90.5188	0.168343	0.264428	0.636633	0.524364	0.998763		90.5188	0.0966733	0.264858	0.365	0.715112	0.999182
CMK1	YFR014C	chrVI	-	72.5019	0.168229	0.289383	0.581338	0.561013	0.998763		72.5019	-0.1372	0.293889	-0.466843	0.640612	0.999182
PRS1	YKL181W	chrXI	+	497.096	0.168008	0.138442	1.21356	0.224914	0.902656		497.096	0.202708	0.138048	1.46838	0.142001	0.954796
EDE1	YBL047C	chrII	-	136.689	0.167933	0.219666	0.764494	0.444573	0.986476		136.689	-0.295994	0.224821	-1.31657	0.187981	0.999182
GUD1	YDL238C	chrIV	-	16.8453	0.167884	0.591812	0.283679	0.776657	0.998763		16.8453	0.0127939	0.595811	0.0214732	0.982868	0.999182
LOG1	YJL055W	chrX	+	181.09	0.167857	0.205042	0.818647	0.412988	0.984362		181.09	0.00968343	0.206141	0.0469749	0.962533	0.999182
ROT1	YMR200W	chrXIII	+	327.959	0.167251	0.163087	1.02554	0.30511	0.96639		327.959	0.0438452	0.163616	0.267976	0.788718	0.999182
DAK1	YML070W	chrXIII	+	140.456	0.167119	0.23297	0.717344	0.473162	0.990471		140.456	-0.317763	0.237953	-1.3354	0.181745	0.999182
PRP11	YDL043C	chrIV	-	60.3519	0.167009	0.312652	0.534171	0.593223	0.998763		60.3519	-0.154854	0.317986	-0.486985	0.626269	0.999182
GPA2	YER020W	chrV	+	240.445	0.166901	0.17723	0.94172	0.346336	0.977915		240.445	0.0901731	0.17751	0.50799	0.611461	0.999182
YBP1	YBR216C	chrII	-	43.5764	0.166901	0.365507	0.456629	0.647938	0.998763		43.5764	-0.253421	0.374156	-0.677313	0.498208	0.999182
JHD1	YER051W	chrV	+	16.358	0.166667	0.595157	0.280039	0.779447	0.998763		16.358	-0.125942	0.604373	-0.208385	0.834929	0.999182
PEX4	YGR133W	chrVII	+	32.0004	0.166287	0.432062	0.384868	0.700335	0.998763		32.0004	0.384303	0.425588	0.902992	0.36653	0.999182
HTD2	YHR067W	chrVIII	+	397.738	0.166243	0.150051	1.10791	0.2679	0.941683		397.738	0.252036	0.149302	1.68809	0.0913938	0.843732
PBI2	YNL015W	chrXIV	+	232.153	0.165868	0.176913	0.93757	0.348465	0.977915		232.153	-0.234895	0.180091	-1.30431	0.192128	0.999182
LPP1	YDR503C	chrIV	-	36.0226	0.165798	0.433687	0.382299	0.70224	0.998763		36.0226	-0.356887	0.445049	-0.801904	0.422608	0.999182
GYP5	YPL249C	chrXVI	-	40.5293	0.165721	0.381311	0.434608	0.663847	0.998763		40.5293	-0.159823	0.387919	-0.412002	0.680338	0.999182
ARC19	YKL013C	chrXI	-	297.98	0.165533	0.162635	1.01782	0.308764	0.96639		297.98	-0.0421436	0.163846	-0.257215	0.797013	0.999182
CSR2	YPR030W	chrXVI	+	48.6817	0.165404	0.408118	0.405285	0.685268	0.998763		48.6817	-0.63482	0.422939	-1.50097	0.133362	0.941936
GRX2	YDR513W	chrIV	+	283.63	0.165369	0.168088	0.983823	0.325203	0.972559		283.63	-0.202022	0.170558	-1.18448	0.236222	0.999182
NBP35	YGL091C	chrVII	-	69.7184	0.165336	0.310022	0.533305	0.593822	0.998763		69.7184	0.00452113	0.311959	0.0144927	0.988437	0.999182
OM14	YBR230C	chrII	-	162.264	0.165331	0.206945	0.79891	0.424342	0.984362		162.264	-0.34477	0.212092	-1.62556	0.104043	0.880786
NA	YBR219C	chrII	-	65.671	0.165213	0.311723	0.529998	0.596113	0.998763		65.671	0.279422	0.309076	0.904057	0.365965	0.999182
FAT1	YBR041W	chrII	+	108.59	0.165063	0.247633	0.666561	0.505052	0.998763		108.59	0.116861	0.247709	0.471768	0.637092	0.999182
AFG2	YLR397C	chrXII	-	102.637	0.164989	0.252802	0.652641	0.513988	0.998763		102.637	0.0347367	0.253997	0.13676	0.89122	0.999182
NGG1	YDR176W	chrIV	+	206.909	0.164631	0.207437	0.793646	0.427401	0.984362		206.909	0.164743	0.207085	0.795532	0.426304	0.999182
SAF1	YBR280C	chrII	-	18.6109	0.164318	0.59984	0.273937	0.784133	0.998763		18.6109	0.279866	0.594926	0.470421	0.638054	0.999182
AIM9	YER080W	chrV	+	106.775	0.164251	0.247094	0.664731	0.506223	0.998763		106.775	-0.0599598	0.24955	-0.240272	0.81012	0.999182
VPS35	YJL154C	chrX	-	105.501	0.164158	0.25661	0.639719	0.522356	0.998763		105.501	-0.096643	0.259497	-0.372425	0.709577	0.999182
CAP2	YIL034C	chrIX	-	390.906	0.164132	0.153514	1.06917	0.284993	0.956539		390.906	0.0193291	0.154113	0.125422	0.90019	0.999182
UTP10	YJL109C	chrX	-	319.403	0.164068	0.161832	1.01381	0.310671	0.968584		319.403	0.110002	0.161907	0.679414	0.496876	0.999182
NA	YNL179C	chrXIV	-	72.5425	0.164001	0.293691	0.558413	0.576562	0.998763		72.5425	0.303424	0.290743	1.04362	0.296663	0.999182
HAM1	YJR069C	chrX	-	125.162	0.163946	0.232656	0.704672	0.481014	0.992743		125.162	0.159008	0.232205	0.684774	0.493486	0.999182
MIC27	YNL100W	chrXIV	+	80.9097	0.163654	0.279962	0.584557	0.558845	0.998763		80.9097	-0.315634	0.287064	-1.09953	0.271539	0.999182
SBA1	YKL117W	chrXI	+	710.818	0.16346	0.121256	1.34806	0.177638	0.853291		710.818	-0.11467	0.122235	-0.938113	0.348186	0.999182
PET117	YER058W	chrV	+	28.785	0.162973	0.443964	0.367086	0.713555	0.998763		28.785	-0.400165	0.459147	-0.87154	0.38346	0.999182
MET8	YBR213W	chrII	+	64.6326	0.162935	0.312355	0.521633	0.601926	0.998763		64.6326	-0.389222	0.321748	-1.20971	0.226389	0.999182
EAP1	YKL204W	chrXI	+	99.0059	0.162935	0.252175	0.646117	0.518203	0.998763		99.0059	-0.199826	0.256827	-0.778058	0.436535	0.999182
KIN28	YDL108W	chrIV	+	54.7709	0.162883	0.336521	0.48402	0.628372	0.998763		54.7709	0.164224	0.335696	0.489204	0.624697	0.999182
PNO1	YOR145C	chrXV	-	276.937	0.162828	0.183093	0.889318	0.373832	0.977915		276.937	0.301547	0.181854	1.65818	0.0972808	0.863405
SEN1	YLR430W	chrXII	+	134.129	0.162613	0.220157	0.73862	0.460138	0.986476		134.129	0.079241	0.220645	0.359133	0.719496	0.999182
ICE2	YIL090W	chrIX	+	111.148	0.162531	0.242783	0.669451	0.503208	0.998763		111.148	0.252777	0.24108	1.04852	0.2944	0.999182
AIM6	YDL237W	chrIV	+	102.03	0.16245	0.248195	0.654527	0.512772	0.998763		102.03	-0.0946162	0.251228	-0.376615	0.70646	0.999182
IRC7	YFR055W	chrVI	+	351.735	0.162395	0.167354	0.970368	0.331863	0.972559		351.735	-0.266435	0.169758	-1.5695	0.116532	0.896064
CAR2	YLR438W	chrXII	+	61.6846	0.162345	0.36453	0.445353	0.656064	0.998763		61.6846	-0.0209845	0.366747	-0.0572179	0.954372	0.999182
KIN2	YLR096W	chrXII	+	86.9558	0.162271	0.26754	0.606532	0.544162	0.998763		86.9558	-0.13135	0.271421	-0.483932	0.628434	0.999182
YHM2	YMR241W	chrXIII	+	383.485	0.16214	0.151939	1.06714	0.285909	0.956539		383.485	0.385908	0.150365	2.56648	0.0102736	0.332063
MPP10	YJR002W	chrX	+	219.632	0.162058	0.179094	0.90488	0.365529	0.977915		219.632	-0.0186213	0.18034	-0.103257	0.917759	0.999182
NA	YPR077C	chrXVI	-	39.5032	0.161964	0.401858	0.403037	0.686921	0.998763		39.5032	0.399369	0.395794	1.00903	0.312959	0.999182
TAO3	YIL129C	chrIX	-	75.6507	0.161549	0.284136	0.56856	0.569655	0.998763		75.6507	-0.0921443	0.287655	-0.32033	0.748719	0.999182
TSR4	YOL022C	chrXV	-	179.508	0.161478	0.197695	0.816807	0.414039	0.984362		179.508	0.24433	0.196469	1.24361	0.213644	0.999182
DET1	YDR051C	chrIV	-	84.0097	0.161058	0.278884	0.577507	0.563597	0.998763		84.0097	0.0417255	0.280041	0.148998	0.881555	0.999182
ERO1	YML130C	chrXIII	-	178.753	0.160988	0.211209	0.762223	0.445927	0.986476		178.753	-0.0694066	0.212982	-0.325879	0.744516	0.999182
SOL2	YCR073W-A	chrIII	+	100.986	0.160625	0.25154	0.638565	0.523106	0.998763		100.986	0.087338	0.251968	0.346624	0.728874	0.999182
UBC1	YDR177W	chrIV	+	220.015	0.160209	0.193508	0.827919	0.407716	0.984362		220.015	0.136234	0.193352	0.704591	0.481065	0.999182
TPI1	YDR050C	chrIV	-	4387.3	0.159132	0.105497	1.5084	0.131452	0.761168		4387.3	0.0833799	0.105521	0.790174	0.429426	0.999182
FMP45	YDL222C	chrIV	-	60.2727	0.159048	0.314443	0.505809	0.612991	0.998763		60.2727	-0.449429	0.325669	-1.38002	0.167581	0.982306
GLR1	YPL091W	chrXVI	+	219.833	0.158642	0.184839	0.858275	0.390741	0.983606		219.833	0.0661834	0.185269	0.357228	0.720921	0.999182
OTU2	YHL013C	chrVIII	-	98.3222	0.158623	0.257252	0.616605	0.537495	0.998763		98.3222	0.304112	0.254684	1.19407	0.232449	0.999182
RPA49	YNL248C	chrXIV	-	319.575	0.158553	0.162982	0.972826	0.33064	0.972559		319.575	0.0251518	0.163596	0.153744	0.877812	0.999182
LSC2	YGR244C	chrVII	-	317.658	0.158475	0.163145	0.971377	0.331361	0.972559		317.658	-0.234013	0.165607	-1.41307	0.157636	0.972787
POM34	YLR018C	chrXII	-	65.5896	0.158377	0.305005	0.51926	0.603579	0.998763		65.5896	0.05323	0.306115	0.173889	0.861953	0.999182
RAS2	YNL098C	chrXIV	-	230.545	0.158281	0.177437	0.892042	0.37237	0.977915		230.545	-0.0688718	0.179047	-0.384657	0.700492	0.999182
NUP84	YDL116W	chrIV	+	99.4834	0.158238	0.259664	0.609394	0.542263	0.998763		99.4834	-0.0309636	0.261685	-0.118324	0.905811	0.999182
STE5	YDR103W	chrIV	+	61.952	0.158027	0.309181	0.511113	0.609272	0.998763		61.952	-0.251164	0.316165	-0.794407	0.426959	0.999182
MGL2	YMR210W	chrXIII	+	23.5421	0.157708	0.499794	0.315546	0.752347	0.998763		23.5421	-0.717735	0.527562	-1.36048	0.173679	0.992181
GCN3	YKR026C	chrXI	-	134.332	0.15768	0.224169	0.703398	0.481808	0.992956		134.332	0.231319	0.222829	1.0381	0.299222	0.999182
RIX1	YHR197W	chrVIII	+	117.267	0.157568	0.259841	0.606402	0.544248	0.998763		117.267	0.0107329	0.261048	0.0411145	0.967205	0.999182
NA	YOR012W	chrXV	+	10.9645	0.15752	0.709657	0.221966	0.82434	0.998763		10.9645	-0.579208	0.743848	-0.778665	0.436177	0.999182
RAD6	YGL058W	chrVII	+	182.093	0.157484	0.195733	0.804586	0.421059	0.984362		182.093	0.106587	0.195815	0.544323	0.586219	0.999182
RFA2	YNL312W	chrXIV	+	91.0074	0.156723	0.269038	0.582531	0.560209	0.998763		91.0074	0.04211	0.270079	0.155918	0.876098	0.999182
OSH3	YHR073W	chrVIII	+	117.457	0.156717	0.242162	0.647159	0.517529	0.998763		117.457	-0.0922807	0.244763	-0.37702	0.706159	0.999182
IST1	YNL265C	chrXIV	-	66.2842	0.1567	0.305107	0.513592	0.607538	0.998763		66.2842	-0.138677	0.309608	-0.447912	0.654217	0.999182
GSP1	YLR293C	chrXII	-	2230.47	0.156601	0.097166	1.61168	0.107031	0.705811		2230.47	0.198756	0.0970271	2.04846	0.0405146	0.623075
RRG7	YOR305W	chrXV	+	47.2705	0.156553	0.372701	0.420049	0.674449	0.998763		47.2705	0.436643	0.366408	1.19168	0.233385	0.999182
TPO2	YGR138C	chrVII	-	429.563	0.15648	0.155196	1.00827	0.313324	0.969444		429.563	-0.322233	0.157616	-2.04442	0.0409118	0.625205
MME1	YMR166C	chrXIII	-	33.4495	0.156475	0.418604	0.373802	0.708552	0.998763		33.4495	-0.386568	0.431892	-0.895057	0.370757	0.999182
SRP54	YPR088C	chrXVI	-	247.559	0.156075	0.171461	0.910264	0.362683	0.977915		247.559	0.0703691	0.171818	0.409556	0.682131	0.999182
CAN1	YEL063C	chrV	-	181.058	0.155758	0.214267	0.726937	0.467265	0.987067		181.058	0.342327	0.212225	1.61304	0.106736	0.880786
SPC42	YKL042W	chrXI	+	28.2131	0.155697	0.474242	0.328306	0.74268	0.998763		28.2131	0.477323	0.464898	1.02672	0.30455	0.999182
NA	YKL169C	chrXI	-	26.0351	0.15566	0.472305	0.329576	0.741721	0.998763		26.0351	-0.383519	0.48735	-0.786948	0.431312	0.999182
YPS7	YDR349C	chrIV	-	221.632	0.155654	0.17891	0.870015	0.384292	0.979867		221.632	0.0478443	0.179491	0.266556	0.789811	0.999182
SQS1	YNL224C	chrXIV	-	61.5831	0.155639	0.311685	0.499346	0.617536	0.998763		61.5831	-0.317228	0.319939	-0.991526	0.321429	0.999182
NA	YDL144C	chrIV	-	50.6121	0.155565	0.341942	0.454945	0.649149	0.998763		50.6121	-0.124736	0.346885	-0.359588	0.719155	0.999182
DSK2	YMR276W	chrXIII	+	378.498	0.155442	0.146565	1.06057	0.288886	0.956539		378.498	-0.0649899	0.147708	-0.439989	0.659945	0.999182
RMD9	YGL107C	chrVII	-	59.547	0.155348	0.332935	0.466601	0.640785	0.998763		59.547	-0.0209749	0.335335	-0.0625489	0.950126	0.999182
TRX2	YGR209C	chrVII	-	625.321	0.155221	0.130233	1.19187	0.233311	0.908483		625.321	0.038967	0.130549	0.298485	0.765333	0.999182
VHS2	YIL135C	chrIX	-	63.0505	0.154969	0.32483	0.477079	0.633306	0.998763		63.0505	0.31572	0.321402	0.982321	0.325942	0.999182
ALG8	YOR067C	chrXV	-	91.0399	0.154768	0.267466	0.578645	0.562828	0.998763		91.0399	0.0536028	0.268318	0.199773	0.841658	0.999182
RVB1	YDR190C	chrIV	-	262.64	0.154756	0.172464	0.897328	0.369544	0.977915		262.64	0.169032	0.172023	0.982613	0.325798	0.999182
HSU1	YLL058W	chrXII	+	34.1827	0.154465	0.417757	0.369747	0.711571	0.998763		34.1827	-0.287618	0.428025	-0.671964	0.501607	0.999182
CUB1	YPL260W	chrXVI	+	116.55	0.154448	0.238261	0.64823	0.516836	0.998763		116.55	-0.0794294	0.240725	-0.329958	0.741432	0.999182
TYE7	YOR344C	chrXV	-	157.646	0.154348	0.207879	0.742489	0.457791	0.986476		157.646	0.0172636	0.208901	0.0826401	0.934138	0.999182
UTP18	YJL069C	chrX	-	88.7649	0.154155	0.26907	0.572918	0.5667	0.998763		88.7649	0.420751	0.264618	1.59003	0.111827	0.888284
NCW1	YMR122W-A	chrXIII	+	3314.5	0.15407	0.0963168	1.59961	0.109684	0.71007		3314.5	0.020957	0.0964153	0.217362	0.827926	0.999182
AHC2	YCR082W	chrIII	+	267.264	0.153946	0.167902	0.916883	0.359204	0.977915		267.264	-0.0634684	0.169292	-0.374905	0.707731	0.999182
FAL1	YDR021W	chrIV	+	52.2385	0.153928	0.341713	0.45046	0.652379	0.998763		52.2385	-0.106415	0.346089	-0.30748	0.758478	0.999182
CSI2	YOL007C	chrXV	-	104.883	0.153601	0.261446	0.587507	0.556863	0.998763		104.883	0.307443	0.258965	1.1872	0.235148	0.999182
NA	YLR456W	chrXII	+	28.9429	0.153167	0.463744	0.330284	0.741185	0.998763		28.9429	0.276809	0.459455	0.602474	0.546859	0.999182
GAP1	YKR039W	chrXI	+	29.0821	0.152995	0.449859	0.340094	0.733785	0.998763		29.0821	0.157817	0.448606	0.351795	0.724992	0.999182
ALG12	YNR030W	chrXIV	+	83.986	0.152832	0.280076	0.54568	0.585286	0.998763		83.986	-0.224529	0.285262	-0.787098	0.431225	0.999182
CAK1	YFL029C	chrVI	-	43.7872	0.152781	0.372442	0.410214	0.681649	0.998763		43.7872	0.108791	0.372482	0.292071	0.770232	0.999182
UBA1	YKL210W	chrXI	+	331.119	0.15248	0.163322	0.933611	0.350504	0.977915		331.119	-0.151652	0.165067	-0.91873	0.358237	0.999182
CPR4	YCR069W	chrIII	+	118.398	0.152229	0.23313	0.652979	0.51377	0.998763		118.398	-0.0942686	0.235778	-0.399818	0.68929	0.999182
SDH2	YLL041C	chrXII	-	79.8789	0.151956	0.277758	0.547081	0.584323	0.998763		79.8789	-0.433809	0.286936	-1.51187	0.130568	0.939303
DPC25	YPL107W	chrXVI	+	67.7954	0.15194	0.321909	0.471998	0.636928	0.998763		67.7954	-0.187269	0.326834	-0.572979	0.566659	0.999182
SPS18	YNL204C	chrXIV	-	7.15348	0.151838	0.900238	0.168665	0.86606	0.998763		7.15348	0.302632	0.889856	0.340091	0.733788	0.999182
CCT7	YJL111W	chrX	+	276.545	0.15162	0.165434	0.916501	0.359404	0.977915		276.545	0.166438	0.164994	1.00875	0.313094	0.999182
SND1	YDR186C	chrIV	-	136.327	0.151553	0.236735	0.640181	0.522055	0.998763		136.327	-0.115554	0.239233	-0.483018	0.629083	0.999182
CAC2	YML102W	chrXIII	+	55.5035	0.151342	0.332282	0.455462	0.648777	0.998763		55.5035	-0.00570284	0.334492	-0.0170492	0.986397	0.999182
VBA4	YDR119W	chrIV	+	131.815	0.15107	0.232261	0.65043	0.515414	0.998763		131.815	0.239106	0.230778	1.03609	0.30016	0.999182
NRP1	YDL167C	chrIV	-	110.669	0.150926	0.265137	0.569237	0.569195	0.998763		110.669	0.387568	0.261855	1.48009	0.13885	0.948449
RPB9	YGL070C	chrVII	-	123.909	0.150873	0.228562	0.6601	0.50919	0.998763		123.909	0.147568	0.228079	0.647004	0.517629	0.999182
KOG1	YHR186C	chrVIII	-	57.0364	0.150807	0.332725	0.453248	0.65037	0.998763		57.0364	0.23251	0.330455	0.703604	0.48168	0.999182
SNF4	YGL115W	chrVII	+	134.553	0.150638	0.222846	0.67597	0.499059	0.997087		134.553	0.122032	0.222685	0.548004	0.583689	0.999182
MLC1	YGL106W	chrVII	+	304.958	0.150393	0.165973	0.906129	0.364867	0.977915		304.958	0.214855	0.165234	1.30031	0.193495	0.999182
NA	YOR062C	chrXV	-	103.871	0.150348	0.275371	0.545981	0.585079	0.998763		103.871	-0.00165142	0.276724	-0.00596774	0.995238	0.999182
BOL1	YAL044W-A	chrI	+	145.585	0.150298	0.214074	0.702083	0.482627	0.992956		145.585	0.057021	0.214649	0.265647	0.790511	0.999182
PDC1	YLR044C	chrXII	-	19080.1	0.150127	0.0920518	1.63089	0.102913	0.695938		19080.1	0.113838	0.09205	1.23669	0.216201	0.999182
HXT1	YHR094C	chrVIII	-	349.535	0.15011	0.187949	0.798678	0.424477	0.984362		349.535	0.466818	0.186069	2.50884	0.012113	0.356068
GLC7	YER133W	chrV	+	442.604	0.150094	0.138439	1.08418	0.278284	0.949345		442.604	0.00634422	0.139023	0.0456344	0.963602	0.999182
PHA2	YNL316C	chrXIV	-	45.3411	0.149954	0.368889	0.406502	0.684374	0.998763		45.3411	0.245398	0.366027	0.670436	0.50258	0.999182
SAT4	YCR008W	chrIII	+	146.347	0.149762	0.22638	0.661551	0.508259	0.998763		146.347	0.0944073	0.226514	0.416784	0.676837	0.999182
ITC1	YGL133W	chrVII	+	59.3159	0.149669	0.33923	0.441201	0.659067	0.998763		59.3159	-0.0365883	0.341771	-0.107055	0.914745	0.999182
MMS2	YGL087C	chrVII	-	204.509	0.149648	0.19298	0.775459	0.438069	0.985913		204.509	-0.200953	0.195813	-1.02625	0.304773	0.999182
FUN12	YAL035W	chrI	+	488.711	0.149591	0.147783	1.01224	0.311425	0.969014		488.711	0.193516	0.147361	1.31321	0.189112	0.999182
ORC1	YML065W	chrXIII	+	39.5536	0.14941	0.40396	0.369863	0.711485	0.998763		39.5536	0.133108	0.403388	0.329974	0.74142	0.999182
CNA1	YLR433C	chrXII	-	56.2447	0.149346	0.338833	0.440764	0.659384	0.998763		56.2447	0.152928	0.337991	0.452463	0.650936	0.999182
GIP3	YPL137C	chrXVI	-	79.1962	0.149134	0.282376	0.528141	0.597402	0.998763		79.1962	-0.251093	0.288223	-0.871178	0.383657	0.999182
MRF1	YGL143C	chrVII	-	52.1319	0.149116	0.341758	0.436321	0.662604	0.998763		52.1319	-0.0803442	0.345518	-0.232532	0.816125	0.999182
VHR2	YER064C	chrV	-	186.186	0.149066	0.193535	0.770228	0.441165	0.986476		186.186	0.223251	0.192408	1.1603	0.245927	0.999182
FRE6	YLL051C	chrXII	-	124.146	0.149043	0.26865	0.554785	0.579042	0.998763		124.146	0.00185123	0.269756	0.00686259	0.994524	0.999182
YLH47	YPR125W	chrXVI	+	121.981	0.148761	0.233602	0.636815	0.524245	0.998763		121.981	0.0686708	0.234068	0.29338	0.769232	0.999182
NA	YML084W	chrXIII	+	13.0319	0.148631	0.676704	0.219639	0.826152	0.998763		13.0319	-0.484126	0.702051	-0.689587	0.490454	0.999182
THI22	YPR121W	chrXVI	+	24.1519	0.148603	0.514549	0.288803	0.772733	0.998763		24.1519	-0.437678	0.530997	-0.824257	0.409793	0.999182
NA	YMR304C-A	chrXIII	-	651.557	0.148364	0.12891	1.15091	0.249767	0.928955		651.557	0.384906	0.127762	3.01268	0.00258956	0.154321
RPN12	YFR052W	chrVI	+	238.671	0.148138	0.173397	0.854325	0.392925	0.983851		238.671	-0.117439	0.175334	-0.669802	0.502984	0.999182
POP8	YBL018C	chrII	-	75.0473	0.147321	0.293768	0.501487	0.616028	0.998763		75.0473	0.300312	0.290697	1.03308	0.301568	0.999182
CCH1	YGR217W	chrVII	+	66.2825	0.14721	0.314799	0.467631	0.640048	0.998763		66.2825	0.105911	0.314781	0.33646	0.736524	0.999182
SUA5	YGL169W	chrVII	+	100.972	0.147178	0.249804	0.589174	0.555745	0.998763		100.972	-0.0146371	0.251488	-0.0582022	0.953588	0.999182
TGL1	YKL140W	chrXI	+	54.9101	0.147173	0.330619	0.445142	0.656217	0.998763		54.9101	-0.12716	0.335218	-0.379334	0.70444	0.999182
NA	YDL057W	chrIV	+	27.1028	0.147167	0.482761	0.304845	0.760484	0.998763		27.1028	-0.157418	0.490017	-0.321251	0.748021	0.999182
PPH3	YDR075W	chrIV	+	56.2865	0.147079	0.32945	0.446438	0.655281	0.998763		56.2865	0.150582	0.328588	0.45827	0.646759	0.999182
TIR2	YOR010C	chrXV	-	11.2183	0.147036	0.743236	0.197832	0.843177	0.998763		11.2183	-0.195349	0.756266	-0.258307	0.79617	0.999182
PDR10	YOR328W	chrXV	+	21.4974	0.146963	0.529681	0.277456	0.78143	0.998763		21.4974	-0.100332	0.536149	-0.187134	0.851556	0.999182
CDC25	YLR310C	chrXII	-	95.8996	0.146492	0.273619	0.535388	0.592381	0.998763		95.8996	-0.0422861	0.275602	-0.153432	0.878058	0.999182
UTP20	YBL004W	chrII	+	302.509	0.146247	0.170579	0.857355	0.391249	0.983851		302.509	0.161602	0.170183	0.949579	0.342326	0.999182
OSH7	YHR001W	chrVIII	+	104.451	0.146214	0.253898	0.575876	0.564699	0.998763		104.451	0.0701901	0.254344	0.275965	0.782575	0.999182
MNL2	YLR057W	chrXII	+	63.6626	0.146086	0.327206	0.446466	0.655261	0.998763		63.6626	-0.199823	0.332499	-0.600974	0.547857	0.999182
SBP1	YHL034C	chrVIII	-	518.393	0.145939	0.139331	1.04742	0.294904	0.960253		518.393	-0.0327948	0.14	-0.234249	0.814791	0.999182
BMT2	YBR141C	chrII	-	49.1389	0.14587	0.368695	0.39564	0.692371	0.998763		49.1389	0.196634	0.366898	0.535936	0.592003	0.999182
FIP1	YJR093C	chrX	-	71.7563	0.145818	0.302372	0.482247	0.629631	0.998763		71.7563	-0.0985218	0.305707	-0.322276	0.747244	0.999182
NAM9	YNL137C	chrXIV	-	79.1948	0.145671	0.282596	0.515475	0.606221	0.998763		79.1948	0.0441298	0.283532	0.155643	0.876314	0.999182
NA	YOL106W	chrXV	+	23.8265	0.145653	0.489173	0.297753	0.765892	0.998763		23.8265	-0.315331	0.502393	-0.627658	0.530228	0.999182
COR1	YBL045C	chrII	-	170.016	0.145572	0.212694	0.684418	0.493711	0.997087		170.016	0.0421771	0.213287	0.197748	0.843242	0.999182
ATG32	YIL146C	chrIX	-	69.3538	0.145493	0.314641	0.46241	0.643787	0.998763		69.3538	0.224116	0.312705	0.716702	0.473558	0.999182
RIX7	YLL034C	chrXII	-	148.432	0.145265	0.227686	0.638006	0.52347	0.998763		148.432	0.297201	0.225689	1.31686	0.187886	0.999182
JJJ2	YJL162C	chrX	-	26.4297	0.145254	0.483564	0.300382	0.763886	0.998763		26.4297	-0.106241	0.489455	-0.21706	0.828162	0.999182
ADE4	YMR300C	chrXIII	-	435.982	0.145136	0.145102	1.00024	0.317196	0.972219		435.982	0.308187	0.143973	2.14059	0.0323072	0.573167
RPB5	YBR154C	chrII	-	391.818	0.145096	0.145213	0.999196	0.3177	0.972219		391.818	0.00246714	0.145835	0.0169173	0.986503	0.999182
SNF7	YLR025W	chrXII	+	132.853	0.145038	0.230625	0.628893	0.529419	0.998763		132.853	-0.0409356	0.232292	-0.176224	0.860118	0.999182
NA	YLR361C-A	chrXII	-	91.3528	0.144959	0.273195	0.530608	0.595691	0.998763		91.3528	-0.167396	0.277103	-0.604093	0.545782	0.999182
PIB2	YGL023C	chrVII	-	66.4681	0.144902	0.314735	0.460393	0.645234	0.998763		66.4681	0.178307	0.313468	0.56882	0.569478	0.999182
TMA17	YDL110C	chrIV	-	157.097	0.144696	0.208889	0.692692	0.488503	0.996033		157.097	-0.405346	0.21467	-1.88823	0.058995	0.721661
SKN7	YHR206W	chrVIII	+	108.082	0.144604	0.250755	0.576674	0.56416	0.998763		108.082	0.327642	0.247875	1.3218	0.186233	0.999182
AEP3	YPL005W	chrXVI	+	22.7077	0.144388	0.510878	0.282628	0.777462	0.998763		22.7077	-0.0201664	0.51463	-0.0391863	0.968742	0.999182
SUV3	YPL029W	chrXVI	+	35.0903	0.144334	0.418422	0.344948	0.730134	0.998763		35.0903	0.309311	0.413536	0.747967	0.45448	0.999182
ATG18	YFR021W	chrVI	+	39.4251	0.144073	0.399092	0.361003	0.718097	0.998763		39.4251	-0.205039	0.406163	-0.504821	0.613685	0.999182
VPS62	YGR141W	chrVII	+	50.8492	0.144015	0.344648	0.417861	0.676049	0.998763		50.8492	-0.391146	0.355143	-1.10138	0.270732	0.999182
BUD3	YCL014W	chrIII	+	62.926	0.14399	0.319025	0.451343	0.651742	0.998763		62.926	0.347171	0.314798	1.10284	0.270098	0.999182
NA	YBR109W-A	chrII	+	81.3482	0.143843	0.285781	0.503333	0.61473	0.998763		81.3482	0.0509268	0.286548	0.177725	0.858939	0.999182
DAD4	YDR320C-A	chrIV	-	96.8187	0.143679	0.264499	0.543213	0.586983	0.998763		96.8187	0.228148	0.262771	0.868236	0.385265	0.999182
MIY2	YPL191C	chrXVI	-	27.1314	0.143475	0.485093	0.295768	0.767407	0.998763		27.1314	-0.0409348	0.488946	-0.0837205	0.933279	0.999182
SHR3	YDL212W	chrIV	+	482.689	0.142896	0.147858	0.96644	0.333824	0.972649		482.689	0.141002	0.147654	0.954947	0.339604	0.999182
BUD16	YEL029C	chrV	-	61.2631	0.142867	0.318056	0.449187	0.653297	0.998763		61.2631	0.0562934	0.31886	0.176546	0.859865	0.999182
VTC1	YER072W	chrV	+	970.361	0.142867	0.113715	1.25636	0.208985	0.896108		970.361	0.0885223	0.113749	0.778227	0.436435	0.999182
RKM4	YDR257C	chrIV	-	72.8745	0.142796	0.287945	0.495915	0.619954	0.998763		72.8745	-0.0531774	0.290562	-0.183016	0.854786	0.999182
PFK2	YMR205C	chrXIII	-	715.243	0.142402	0.124098	1.1475	0.251176	0.92931		715.243	0.173977	0.123802	1.40529	0.159935	0.977274
QCR7	YDR529C	chrIV	-	239.186	0.14232	0.178632	0.796719	0.425615	0.984362		239.186	0.0901008	0.17871	0.504172	0.61414	0.999182
SEN15	YMR059W	chrXIII	+	62.0032	0.142054	0.316873	0.448299	0.653937	0.998763		62.0032	0.0655578	0.317489	0.206488	0.836409	0.999182
NA	YML122C	chrXIII	-	45.3569	0.141963	0.372051	0.381567	0.702782	0.998763		45.3569	-0.568215	0.387207	-1.46747	0.142248	0.954975
SAE2	YGL175C	chrVII	-	17.1401	0.141885	0.613562	0.231248	0.817122	0.998763		17.1401	-0.362374	0.629933	-0.575258	0.565117	0.999182
BNI5	YNL166C	chrXIV	-	70.0645	0.141442	0.300805	0.470213	0.638203	0.998763		70.0645	0.181572	0.299438	0.606377	0.544264	0.999182
NA	YHR210C	chrVIII	-	19.6058	0.141296	0.566633	0.249361	0.803082	0.998763		19.6058	-0.254952	0.57826	-0.440896	0.659288	0.999182
TRM9	YML014W	chrXIII	+	89.1509	0.141271	0.26441	0.534286	0.593144	0.998763		89.1509	-0.143388	0.268117	-0.534796	0.592791	0.999182
RTN1	YDR233C	chrIV	-	1070.17	0.140683	0.120689	1.16566	0.243752	0.922263		1070.17	0.129412	0.1206	1.07307	0.28324	0.999182
GLC8	YMR311C	chrXIII	-	187.325	0.14066	0.195783	0.718448	0.472481	0.990049		187.325	-0.165043	0.198378	-0.831964	0.405429	0.999182
SWC4	YGR002C	chrVII	-	54.7006	0.140637	0.337618	0.416556	0.677003	0.998763		54.7006	0.0377084	0.33878	0.111306	0.911373	0.999182
TEF2	YBR118W	chrII	+	16560.8	0.140636	0.0860907	1.63358	0.102348	0.69458		16560.8	0.14635	0.0860783	1.7002	0.089093	0.841091
BMS1	YPL217C	chrXVI	-	211.527	0.140491	0.189599	0.740992	0.458699	0.986476		211.527	0.195919	0.188744	1.03801	0.299264	0.999182
GFD1	YMR255W	chrXIII	+	104.568	0.140345	0.245051	0.572716	0.566837	0.998763		104.568	-0.0912013	0.2477	-0.368193	0.712729	0.999182
KRE2	YDR483W	chrIV	+	398.907	0.140345	0.145346	0.965587	0.334251	0.972649		398.907	0.0548787	0.145605	0.3769	0.706248	0.999182
DBF4	YDR052C	chrIV	-	69.1955	0.140268	0.300857	0.466226	0.641054	0.998763		69.1955	0.0712085	0.301312	0.236328	0.813178	0.999182
TGL3	YMR313C	chrXIII	-	53.5343	0.140219	0.353559	0.396594	0.691667	0.998763		53.5343	-0.0351806	0.356065	-0.0988039	0.921294	0.999182
SRP101	YDR292C	chrIV	-	111.8	0.139925	0.239606	0.583979	0.559234	0.998763		111.8	0.124843	0.239249	0.521814	0.6018	0.999182
SLC1	YDL052C	chrIV	-	230.876	0.139832	0.181002	0.772544	0.439793	0.986301		230.876	0.0331047	0.181544	0.182351	0.855307	0.999182
RET1	YOR207C	chrXV	-	264.497	0.139805	0.16976	0.823542	0.4102	0.984362		264.497	0.0779154	0.16991	0.458567	0.646545	0.999182
NA	YOL163W	chrXV	+	8.43924	0.139794	0.834005	0.167618	0.866884	0.998763		8.43924	0.184574	0.829697	0.222459	0.823956	0.999182
RPC10	YHR143W-A	chrVIII	+	544.835	0.139785	0.136364	1.02508	0.305323	0.96639		544.835	0.245439	0.135667	1.80914	0.07043	0.783911
NA	YHR007C-A	chrVIII	-	290.123	0.139605	0.185614	0.752121	0.451978	0.986476		290.123	-0.130207	0.187133	-0.695797	0.486556	0.999182
PST1	YDR055W	chrIV	+	787.608	0.139306	0.145717	0.956004	0.33907	0.974761		787.608	-0.587261	0.148037	-3.967	7.28e-05	0.0134321
NA	YJL213W	chrX	+	83.9459	0.139241	0.270596	0.514572	0.606852	0.998763		83.9459	0.00822199	0.271984	0.0302297	0.975884	0.999182
VAN1	YML115C	chrXIII	-	112.696	0.139188	0.238787	0.582895	0.559964	0.998763		112.696	0.013231	0.239889	0.0551547	0.956015	0.999182
NA	YMR230W-A	chrXIII	+	20.8625	0.138933	0.549026	0.253053	0.800227	0.998763		20.8625	0.0118185	0.551659	0.0214236	0.982908	0.999182
SMC4	YLR086W	chrXII	+	56.1623	0.138755	0.33296	0.416731	0.676875	0.998763		56.1623	0.0741314	0.333382	0.222362	0.824032	0.999182
GCN20	YFR009W	chrVI	+	231.192	0.13872	0.18653	0.743687	0.457066	0.986476		231.192	-0.0276564	0.18755	-0.147461	0.882768	0.999182
MMS4	YBR098W	chrII	+	14.9546	0.138462	0.63466	0.218168	0.827298	0.998763		14.9546	0.194431	0.631047	0.308108	0.758	0.999182
HCA4	YJL033W	chrX	+	193.339	0.138262	0.189404	0.729984	0.4654	0.986476		193.339	0.0458405	0.189886	0.241411	0.809237	0.999182
IOC3	YFR013W	chrVI	+	63.0053	0.138131	0.318245	0.43404	0.66426	0.998763		63.0053	0.376494	0.313403	1.20131	0.22963	0.999182
RIM8	YGL045W	chrVII	+	53.3874	0.138129	0.357929	0.385911	0.699562	0.998763		53.3874	-0.00998651	0.359896	-0.0277483	0.977863	0.999182
MRP13	YGR084C	chrVII	-	1709.43	0.138059	0.100435	1.37461	0.169251	0.839068		1709.43	0.0915311	0.10044	0.911305	0.362134	0.999182
AAC3	YBR085W	chrII	+	15.3475	0.137959	0.633461	0.217786	0.827596	0.998763		15.3475	-0.296245	0.648314	-0.456946	0.64771	0.999182
WWM1	YFL010C	chrVI	-	394.006	0.137794	0.148673	0.926824	0.354018	0.977915		394.006	0.0475073	0.148958	0.31893	0.74978	0.999182
GAB1	YLR459W	chrXII	+	68.6357	0.137674	0.302922	0.454485	0.64948	0.998763		68.6357	0.327161	0.299063	1.09395	0.273976	0.999182
RRS1	YOR294W	chrXV	+	382.98	0.137553	0.154727	0.889002	0.374002	0.977915		382.98	0.192796	0.154147	1.25073	0.211033	0.999182
FRT2	YAL028W	chrI	+	14.2436	0.13744	0.625747	0.219641	0.826151	0.998763		14.2436	-0.482812	0.650223	-0.742533	0.457765	0.999182
RSM28	YDR494W	chrIV	+	76.7474	0.13744	0.285882	0.480757	0.630689	0.998763		76.7474	-0.119113	0.289397	-0.41159	0.68064	0.999182
FPR3	YML074C	chrXIII	-	443.69	0.137318	0.141763	0.968645	0.332722	0.972559		443.69	0.132809	0.141548	0.938262	0.34811	0.999182
TAF10	YDR167W	chrIV	+	115.399	0.13728	0.241737	0.56789	0.570109	0.998763		115.399	0.0356449	0.242488	0.146997	0.883135	0.999182
NA	YFR006W	chrVI	+	105.167	0.137258	0.254044	0.540293	0.588995	0.998763		105.167	-0.00861773	0.255422	-0.0337392	0.973085	0.999182
PHS1	YJL097W	chrX	+	249.271	0.137213	0.174796	0.784989	0.43246	0.984362		249.271	0.329513	0.172929	1.90548	0.0567175	0.713213
ADE17	YMR120C	chrXIII	-	538.471	0.137107	0.141164	0.971257	0.331421	0.972559		538.471	0.0868644	0.141196	0.615206	0.538419	0.999182
SUP45	YBR143C	chrII	-	660.332	0.137047	0.123118	1.11314	0.265648	0.941683		660.332	0.102835	0.123078	0.835524	0.403423	0.999182
GRX6	YDL010W	chrIV	+	67.6238	0.136785	0.306773	0.445884	0.655681	0.998763		67.6238	0.211514	0.304805	0.693933	0.487725	0.999182
GAS5	YOL030W	chrXV	+	455.516	0.136384	0.140148	0.973144	0.330482	0.972559		455.516	0.15055	0.139834	1.07664	0.281643	0.999182
POP3	YNL282W	chrXIV	+	53.4919	0.136383	0.346645	0.393437	0.693996	0.998763		53.4919	0.650358	0.33634	1.93363	0.0531588	0.705618
MTR3	YGR158C	chrVII	-	106.859	0.136299	0.247186	0.551403	0.581358	0.998763		106.859	0.183458	0.246002	0.74576	0.455813	0.999182
ARC18	YLR370C	chrXII	-	190.361	0.136226	0.19117	0.71259	0.4761	0.990992		190.361	-0.230436	0.19442	-1.18525	0.235919	0.999182
PET111	YMR257C	chrXIII	-	29.3272	0.136213	0.466422	0.292038	0.770257	0.998763		29.3272	0.23074	0.462944	0.498419	0.618189	0.999182
SRM1	YGL097W	chrVII	+	142.875	0.13597	0.241369	0.563326	0.573213	0.998763		142.875	0.207162	0.240214	0.862403	0.388466	0.999182
FRS2	YFL022C	chrVI	-	356.116	0.135969	0.163922	0.829472	0.406837	0.984362		356.116	0.322313	0.16256	1.98273	0.0473976	0.669535
GIM3	YNL153C	chrXIV	-	248.462	0.135885	0.17373	0.782163	0.434119	0.984452		248.462	0.210177	0.172783	1.21642	0.223824	0.999182
LDH1	YBR204C	chrII	-	48.9485	0.135695	0.35081	0.386804	0.698901	0.998763		48.9485	-0.0677426	0.354166	-0.191274	0.848311	0.999182
KRI1	YNL308C	chrXIV	-	201.366	0.135644	0.188662	0.718979	0.472154	0.990049		201.366	0.0932754	0.18866	0.494411	0.621016	0.999182
BTN2	YGR142W	chrVII	+	57.7747	0.135321	0.328627	0.411779	0.680502	0.998763		57.7747	-0.17559	0.333758	-0.5261	0.598819	0.999182
SUS1	YBR111W-A	chrII	+	100.522	0.13524	0.255542	0.52923	0.596646	0.998763		100.522	0.022493	0.256514	0.0876875	0.930125	0.999182
BCH1	YMR237W	chrXIII	+	109.92	0.135206	0.256204	0.527726	0.59769	0.998763		109.92	-0.144139	0.259243	-0.556	0.578211	0.999182
RPN11	YFR004W	chrVI	+	207.028	0.135145	0.191668	0.7051	0.480748	0.992551		207.028	0.0329427	0.192199	0.171399	0.86391	0.999182
PER33	YLR064W	chrXII	+	123.399	0.135118	0.235325	0.574175	0.565849	0.998763		123.399	0.231869	0.233655	0.992357	0.321024	0.999182
CTM1	YHR109W	chrVIII	+	14.9306	0.135076	0.608706	0.221907	0.824386	0.998763		14.9306	-0.405131	0.629158	-0.643926	0.519623	0.999182
SPB1	YCL054W	chrIII	+	198.508	0.134951	0.197356	0.683795	0.494105	0.997087		198.508	0.277103	0.195715	1.41585	0.156819	0.971508
NA	YBR096W	chrII	+	148.025	0.134743	0.212555	0.633919	0.526134	0.998763		148.025	-0.0669703	0.214368	-0.312408	0.75473	0.999182
SCS22	YBL091C-A	chrII	-	41.4597	0.134698	0.375127	0.359073	0.71954	0.998763		41.4597	-0.484543	0.389151	-1.24513	0.213085	0.999182
ESC2	YDR363W	chrIV	+	54.6241	0.134315	0.339106	0.396086	0.692042	0.998763		54.6241	-0.124532	0.343313	-0.362737	0.716802	0.999182
GLN3	YER040W	chrV	+	48.4325	0.134075	0.358368	0.374127	0.70831	0.998763		48.4325	0.0209966	0.359814	0.0583542	0.953466	0.999182
STB1	YNL309W	chrXIV	+	30.3385	0.13377	0.451061	0.296568	0.766796	0.998763		30.3385	0.197177	0.448359	0.439774	0.660101	0.999182
NOP9	YJL010C	chrX	-	158.787	0.133599	0.206453	0.647119	0.517555	0.998763		158.787	-0.0999716	0.208547	-0.479373	0.631673	0.999182
LSM6	YDR378C	chrIV	-	279.586	0.133494	0.165717	0.805554	0.4205	0.984362		279.586	0.269805	0.164374	1.64141	0.100712	0.865125
NA	YGR190C	chrVII	-	72.6996	0.133423	0.301375	0.442712	0.657974	0.998763		72.6996	0.095704	0.3013	0.317637	0.75076	0.999182
PRM8	YGL053W	chrVII	+	43.2902	0.133307	0.375657	0.354863	0.722692	0.998763		43.2902	-0.0252045	0.378202	-0.0666428	0.946866	0.999182
SWM1	YDR260C	chrIV	-	71.273	0.1332	0.296584	0.449113	0.65335	0.998763		71.273	0.19869	0.294802	0.673978	0.500325	0.999182
ARC40	YBR234C	chrII	-	231.393	0.133141	0.177923	0.748303	0.454277	0.986476		231.393	-0.161615	0.180141	-0.897158	0.369635	0.999182
IMP4	YNL075W	chrXIV	+	176.152	0.133069	0.210509	0.632132	0.5273	0.998763		176.152	-0.0229815	0.211597	-0.10861	0.913512	0.999182
NA	YPR127W	chrXVI	+	64.8015	0.133063	0.308112	0.431867	0.665838	0.998763		64.8015	-0.0696577	0.310989	-0.223988	0.822767	0.999182
PCS60	YBR222C	chrII	-	149.88	0.133017	0.209829	0.633933	0.526124	0.998763		149.88	-0.147648	0.212565	-0.694603	0.487304	0.999182
MFM1	YPL060W	chrXVI	+	26.6058	0.132939	0.480667	0.276571	0.782109	0.998763		26.6058	-0.792344	0.508187	-1.55916	0.118959	0.904899
AIM3	YBR108W	chrII	+	43.2601	0.132935	0.386965	0.343531	0.731199	0.998763		43.2601	-0.479418	0.399847	-1.199	0.230526	0.999182
DAL82	YNL314W	chrXIV	+	27.4683	0.132861	0.466451	0.284833	0.775772	0.998763		27.4683	0.163434	0.464461	0.35188	0.724928	0.999182
MAE1	YKL029C	chrXI	-	1311.44	0.132768	0.118332	1.122	0.261864	0.939205		1311.44	0.2224	0.118031	1.88425	0.0595317	0.724477
ADE57	YGL234W	chrVII	+	907.066	0.132647	0.119431	1.11065	0.266717	0.941683		907.066	0.26071	0.11888	2.19304	0.0283044	0.545016
HUT1	YPL244C	chrXVI	-	75.3341	0.132628	0.311322	0.426015	0.670097	0.998763		75.3341	0.487266	0.30548	1.59508	0.110694	0.885618
GLN1	YPR035W	chrXVI	+	3134.59	0.132596	0.0930188	1.42547	0.15402	0.807891		3134.59	0.0510102	0.0930639	0.54812	0.58361	0.999182
CTF8	YHR191C	chrVIII	-	53.9575	0.13253	0.338094	0.39199	0.695065	0.998763		53.9575	-0.0342386	0.340532	-0.100544	0.919912	0.999182
LYS1	YIR034C	chrIX	-	361.312	0.132317	0.154978	0.853773	0.393231	0.983851		361.312	0.160152	0.154535	1.03635	0.300039	0.999182
NA	YGL159W	chrVII	+	50.8809	0.132147	0.342268	0.386091	0.699429	0.998763		50.8809	-0.21603	0.348663	-0.619595	0.535525	0.999182
CGR1	YGL029W	chrVII	+	200.315	0.131788	0.20043	0.657527	0.510842	0.998763		200.315	0.0185868	0.201052	0.092448	0.926342	0.999182
RTF1	YGL244W	chrVII	+	109.741	0.131695	0.246451	0.534364	0.593089	0.998763		109.741	0.255586	0.244312	1.04615	0.295492	0.999182
NA	YGR210C	chrVII	-	447.105	0.131509	0.145988	0.900824	0.367682	0.977915		447.105	0.108116	0.145881	0.741129	0.458615	0.999182
CDC24	YAL041W	chrI	+	58.3071	0.131306	0.323919	0.405366	0.685208	0.998763		58.3071	0.263359	0.320709	0.821178	0.411545	0.999182
RER2	YBR002C	chrII	-	91.7813	0.13121	0.265563	0.494084	0.621247	0.998763		91.7813	0.196572	0.264018	0.74454	0.45655	0.999182
SDS23	YGL056C	chrVII	-	144	0.131119	0.238109	0.550669	0.58186	0.998763		144	-0.00344828	0.239061	-0.0144243	0.988491	0.999182
UGO1	YDR470C	chrIV	-	17.9172	0.130386	0.568677	0.22928	0.818651	0.998763		17.9172	0.0507804	0.569982	0.0890913	0.929009	0.999182
FAA2	YER015W	chrV	+	21.7561	0.130355	0.522619	0.249426	0.803031	0.998763		21.7561	0.0106308	0.525038	0.0202477	0.983846	0.999182
RAI1	YGL246C	chrVII	-	115.997	0.130268	0.236471	0.550883	0.581714	0.998763		115.997	0.0205048	0.237342	0.0863933	0.931154	0.999182
CCZ1	YBR131W	chrII	+	24.3373	0.129238	0.490059	0.263719	0.791996	0.998763		24.3373	0.18343	0.487236	0.376471	0.706567	0.999182
COX6	YHR051W	chrVIII	+	214.241	0.129024	0.199959	0.64525	0.518765	0.998763		214.241	0.112264	0.199743	0.562044	0.574086	0.999182
PET494	YNR045W	chrXIV	+	29.9892	0.128773	0.453298	0.284079	0.77635	0.998763		29.9892	0.176921	0.450976	0.392307	0.694832	0.999182
BUR2	YLR226W	chrXII	+	84.2121	0.128611	0.274156	0.469115	0.638988	0.998763		84.2121	-0.135938	0.277629	-0.48964	0.624389	0.999182
RRP4	YHR069C	chrVIII	-	133.124	0.128434	0.236197	0.543758	0.586608	0.998763		133.124	0.150816	0.23547	0.640492	0.521853	0.999182
NA	YCR099C	chrIII	-	33.0279	0.128401	0.417019	0.307903	0.758156	0.998763		33.0279	-0.196885	0.424489	-0.463816	0.64278	0.999182
NA	YDR467C	chrIV	-	74.7933	0.128287	0.288126	0.445248	0.656141	0.998763		74.7933	0.0741299	0.288321	0.257109	0.797095	0.999182
ADH3	YMR083W	chrXIII	+	722.264	0.128181	0.129013	0.993551	0.320441	0.972559		722.264	0.01175	0.12929	0.0908807	0.927587	0.999182
PTP2	YOR208W	chrXV	+	188.477	0.128117	0.197755	0.647856	0.517078	0.998763		188.477	-0.0892481	0.199437	-0.4475	0.654514	0.999182
PNC1	YGL037C	chrVII	-	376.972	0.128091	0.144033	0.889322	0.37383	0.977915		376.972	-0.665354	0.149459	-4.45176	8.52e-06	0.001949
TAF9	YMR236W	chrXIII	+	220.451	0.127984	0.185722	0.689115	0.490751	0.996828		220.451	-0.0442902	0.186852	-0.237033	0.812631	0.999182
RCN1	YKL159C	chrXI	-	52.1523	0.127946	0.363159	0.352315	0.724602	0.998763		52.1523	0.176375	0.361476	0.48793	0.625599	0.999182
ARO1	YDR127W	chrIV	+	540.516	0.127645	0.130178	0.980544	0.326818	0.972559		540.516	0.0369862	0.130418	0.283598	0.776718	0.999182
SRO7	YPR032W	chrXVI	+	53.6897	0.127434	0.335319	0.380039	0.703916	0.998763		53.6897	0.208128	0.332934	0.625133	0.531884	0.999182
NA	YMR206W	chrXIII	+	17.2768	0.127335	0.595108	0.213969	0.830571	0.998763		17.2768	-1.10701	0.644774	-1.7169	0.0859979	0.833889
FAU1	YER183C	chrV	-	85.3017	0.127145	0.276813	0.459316	0.646007	0.998763		85.3017	0.00512303	0.278012	0.0184274	0.985298	0.999182
GPD2	YOL059W	chrXV	+	136.69	0.126944	0.225791	0.56222	0.573966	0.998763		136.69	0.184156	0.224659	0.819713	0.41238	0.999182
IKI3	YLR384C	chrXII	-	204.868	0.126848	0.193596	0.655217	0.512328	0.998763		204.868	0.0887992	0.193554	0.458782	0.646391	0.999182
HSP78	YDR258C	chrIV	-	45.5645	0.126698	0.360368	0.351579	0.725154	0.998763		45.5645	-0.257224	0.367995	-0.698987	0.48456	0.999182
THP1	YOL072W	chrXV	+	31.9512	0.126689	0.433358	0.292343	0.770024	0.998763		31.9512	-0.505421	0.449499	-1.12441	0.26084	0.999182
APD1	YBR151W	chrII	+	158.949	0.126615	0.204928	0.617855	0.536671	0.998763		158.949	-0.0012071	0.20586	-0.00586366	0.995322	0.999182
PSK2	YOL045W	chrXV	+	135.038	0.126607	0.248254	0.50999	0.610058	0.998763		135.038	-0.279051	0.252237	-1.1063	0.268595	0.999182
RAD54	YGL163C	chrVII	-	50.0947	0.126409	0.358945	0.352167	0.724713	0.998763		50.0947	0.140945	0.357834	0.393885	0.693666	0.999182
NA	YNL190W	chrXIV	+	1032.46	0.12632	0.110089	1.14743	0.251204	0.92931		1032.46	0.274818	0.109502	2.50972	0.0120828	0.356068
DCS2	YOR173W	chrXV	+	26.8786	0.12613	0.463746	0.271981	0.785636	0.998763		26.8786	-0.753855	0.490432	-1.53713	0.124263	0.920731
ERV46	YAL042W	chrI	+	281.837	0.125873	0.168373	0.747582	0.454712	0.986476		281.837	-0.0332191	0.169248	-0.196275	0.844395	0.999182
NSR1	YGR159C	chrVII	-	1686.24	0.125862	0.103731	1.21336	0.224993	0.902656		1686.24	0.184778	0.103524	1.78487	0.074282	0.801825
SWE1	YJL187C	chrX	-	39.8676	0.125667	0.413189	0.304138	0.761022	0.998763		39.8676	0.25745	0.409501	0.62869	0.529552	0.999182
ATP4	YPL078C	chrXVI	-	226.232	0.125633	0.182275	0.689247	0.490668	0.996828		226.232	-0.0762168	0.183659	-0.414991	0.678148	0.999182
EMI1	YDR512C	chrIV	-	88.9461	0.125475	0.264503	0.47438	0.635229	0.998763		88.9461	-0.0594415	0.266673	-0.222901	0.823613	0.999182
AIM19	YIL087C	chrIX	-	30.46	0.124953	0.434673	0.287465	0.773756	0.998763		30.46	-0.215988	0.442888	-0.48768	0.625776	0.999182
EXO70	YJL085W	chrX	+	36.7739	0.124777	0.406219	0.307167	0.758716	0.998763		36.7739	0.388107	0.399139	0.97236	0.330871	0.999182
RPS29B	YDL061C	chrIV	-	3304.38	0.124701	0.194989	0.639528	0.52248	0.998763		3304.38	0.440305	0.194797	2.26033	0.0238008	0.506187
TEN1	YLR010C	chrXII	-	20.3392	0.124676	0.550913	0.226308	0.820962	0.998763		20.3392	0.74495	0.530543	1.40413	0.160281	0.977274
COX15	YER141W	chrV	+	127.804	0.12437	0.243149	0.5115	0.609001	0.998763		127.804	-0.199603	0.246449	-0.809917	0.417988	0.999182
SSK2	YNR031C	chrXIV	-	64.4365	0.1242	0.31191	0.398191	0.69049	0.998763		64.4365	0.0553885	0.312377	0.177313	0.859263	0.999182
NA	YLR222C-A	chrXII	-	111.885	0.1242	0.239707	0.51813	0.604367	0.998763		111.885	0.0785939	0.239751	0.327815	0.743051	0.999182
CPR8	YNR028W	chrXIV	+	89.1046	0.124138	0.269526	0.46058	0.6451	0.998763		89.1046	0.292452	0.266476	1.09748	0.272433	0.999182
NCB2	YDR397C	chrIV	-	184.697	0.124138	0.20429	0.607655	0.543416	0.998763		184.697	0.105318	0.204066	0.516099	0.605785	0.999182
NA	YPL245W	chrXVI	+	61.3904	0.12406	0.328647	0.377485	0.705813	0.998763		61.3904	0.249182	0.325749	0.76495	0.444301	0.999182
ETP1	YHL010C	chrVIII	-	25.2541	0.124028	0.481345	0.257669	0.796662	0.998763		25.2541	-0.203599	0.489893	-0.4156	0.677703	0.999182
RRP1	YDR087C	chrIV	-	181.243	0.123973	0.207058	0.598733	0.549351	0.998763		181.243	-0.0603681	0.20841	-0.28966	0.772076	0.999182
MIM1	YOL026C	chrXV	-	123.538	0.123845	0.231825	0.534221	0.593189	0.998763		123.538	0.147461	0.231015	0.638315	0.523268	0.999182
PRP3	YDR473C	chrIV	-	36.6397	0.123608	0.400608	0.308552	0.757662	0.998763		36.6397	0.144885	0.399092	0.363037	0.716577	0.999182
ARL3	YPL051W	chrXVI	+	56.103	0.123423	0.334162	0.369352	0.711866	0.998763		56.103	0.184869	0.332224	0.55646	0.577896	0.999182
NA	YDR182W-A	chrIV	+	124.716	0.123386	0.226764	0.544115	0.586362	0.998763		124.716	-0.134346	0.229514	-0.585352	0.558311	0.999182
ENT5	YDR153C	chrIV	-	140.605	0.123376	0.21979	0.561334	0.57457	0.998763		140.605	0.0952498	0.219627	0.43369	0.664514	0.999182
SPP2	YOR148C	chrXV	-	79.8621	0.123372	0.28278	0.436281	0.662633	0.998763		79.8621	0.300231	0.279408	1.07452	0.282588	0.999182
EAF1	YDR359C	chrIV	-	51.4737	0.12337	0.362685	0.340158	0.733738	0.998763		51.4737	0.404026	0.356688	1.13272	0.257334	0.999182
NUP145	YGL092W	chrVII	+	129.717	0.123256	0.227729	0.541242	0.588341	0.998763		129.717	0.0151174	0.228519	0.066154	0.947255	0.999182
UTP25	YIL091C	chrIX	-	122.907	0.122931	0.237019	0.518652	0.604003	0.998763		122.907	0.310577	0.234274	1.3257	0.184939	0.999182
NA	YNL165W	chrXIV	+	35.4523	0.122792	0.430357	0.285327	0.775394	0.998763		35.4523	0.213902	0.427303	0.500585	0.616664	0.999182
VPS13	YLL040C	chrXII	-	94.9444	0.122611	0.256177	0.478617	0.632211	0.998763		94.9444	-0.220358	0.260685	-0.845304	0.397941	0.999182
NIP7	YPL211W	chrXVI	+	379.758	0.122552	0.151432	0.80929	0.418348	0.984362		379.758	0.377085	0.149641	2.51993	0.0117379	0.353598
SNU56	YDR240C	chrIV	-	33.7451	0.122503	0.437665	0.279901	0.779553	0.998763		33.7451	0.358409	0.431137	0.831311	0.405798	0.999182
FYV6	YNL133C	chrXIV	-	29.4812	0.122478	0.446486	0.274315	0.783843	0.998763		29.4812	-0.384027	0.459652	-0.835474	0.403451	0.999182
IVY1	YDR229W	chrIV	+	43.9937	0.122455	0.361808	0.338453	0.735022	0.998763		43.9937	-0.267816	0.369832	-0.724157	0.468969	0.999182
HTS1	YPR033C	chrXVI	-	501.538	0.122276	0.135636	0.901504	0.36732	0.977915		501.538	0.20643	0.134981	1.52932	0.126185	0.926709
CRH1	YGR189C	chrVII	-	1419.98	0.121961	0.130751	0.932778	0.350935	0.977915		1419.98	-0.0442535	0.130986	-0.337849	0.735477	0.999182
YSC83	YHR017W	chrVIII	+	53.3631	0.121943	0.342811	0.355714	0.722055	0.998763		53.3631	0.197217	0.340565	0.579086	0.562531	0.999182
ULS1	YOR191W	chrXV	+	52.0093	0.121884	0.352881	0.345396	0.729797	0.998763		52.0093	0.294079	0.34882	0.84307	0.399189	0.999182
ATG23	YLR431C	chrXII	-	36.394	0.121829	0.405081	0.300753	0.763603	0.998763		36.394	0.128295	0.403923	0.317622	0.750772	0.999182
LCL2	YLR104W	chrXII	+	85.5156	0.121813	0.272456	0.447093	0.654808	0.998763		85.5156	-0.00135655	0.273693	-0.00495646	0.996045	0.999182
YAP1802	YGR241C	chrVII	-	40.8894	0.12163	0.398683	0.30508	0.760306	0.998763		40.8894	0.144496	0.397278	0.363716	0.71607	0.999182
SOP4	YJL192C	chrX	-	188.222	0.121397	0.193349	0.627864	0.530093	0.998763		188.222	0.0436786	0.193691	0.225507	0.821585	0.999182
FDC1	YDR539W	chrIV	+	85.9763	0.12102	0.269556	0.448959	0.653461	0.998763		85.9763	-0.181879	0.27364	-0.664664	0.506265	0.999182
TRM1	YDR120C	chrIV	-	177.463	0.121	0.213787	0.565983	0.571406	0.998763		177.463	0.251738	0.21219	1.18638	0.235472	0.999182
ALD2	YMR170C	chrXIII	-	43.9874	0.120679	0.36665	0.329141	0.742049	0.998763		43.9874	-0.434318	0.378582	-1.14723	0.251288	0.999182
NIP1	YMR309C	chrXIII	-	450.915	0.120575	0.147808	0.815753	0.414642	0.984362		450.915	0.165813	0.147342	1.12536	0.260435	0.999182
ECM25	YJL201W	chrX	+	55.8605	0.120447	0.342672	0.351493	0.725218	0.998763		55.8605	0.395305	0.336927	1.17327	0.240689	0.999182
CPP1	YBR016W	chrII	+	185.74	0.120444	0.198789	0.605886	0.54459	0.998763		185.74	0.0546418	0.199011	0.274567	0.783649	0.999182
ARA1	YBR149W	chrII	+	212.661	0.120272	0.180233	0.667315	0.504571	0.998763		212.661	-0.417268	0.185084	-2.25448	0.0241658	0.508282
EAF5	YEL018W	chrV	+	41.4553	0.120264	0.390478	0.307992	0.758088	0.998763		41.4553	0.143196	0.389061	0.368056	0.712831	0.999182
YCF1	YDR135C	chrIV	-	184.044	0.119741	0.210199	0.569656	0.568911	0.998763		184.044	0.0578301	0.210373	0.274893	0.783398	0.999182
ARC1	YGL105W	chrVII	+	659.854	0.119727	0.125424	0.954581	0.33979	0.974761		659.854	0.111696	0.125273	0.891622	0.372596	0.999182
CHA4	YLR098C	chrXII	-	41.1019	0.119697	0.397272	0.301296	0.763188	0.998763		41.1019	0.52821	0.387745	1.36226	0.173116	0.992181
HNT1	YDL125C	chrIV	-	393.615	0.11943	0.148526	0.804107	0.421335	0.984362		393.615	0.161346	0.148015	1.09007	0.275684	0.999182
RTT105	YER104W	chrV	+	17.9039	0.11937	0.608577	0.196147	0.844495	0.998763		17.9039	-0.462295	0.627327	-0.736929	0.461165	0.999182
RRP9	YPR137W	chrXVI	+	157.743	0.119358	0.210425	0.567225	0.570561	0.998763		157.743	0.245196	0.208654	1.17513	0.239942	0.999182
SIW14	YNL032W	chrXIV	+	93.1556	0.119222	0.264946	0.449986	0.65272	0.998763		93.1556	0.133759	0.264135	0.506405	0.612573	0.999182
MTW1	YAL034W-A	chrI	+	21.8506	0.119044	0.542625	0.219385	0.82635	0.998763		21.8506	-0.0511598	0.546482	-0.0936167	0.925414	0.999182
SMM1	YNR015W	chrXIV	+	112.498	0.1189	0.253676	0.468709	0.639278	0.998763		112.498	0.081632	0.25361	0.32188	0.747544	0.999182
NA	YML116W-A	chrXIII	+	152.01	0.118874	0.224649	0.529156	0.596697	0.998763		152.01	-0.109937	0.226612	-0.485132	0.627583	0.999182
JIP4	YDR475C	chrIV	-	44.2983	0.118695	0.364755	0.325412	0.74487	0.998763		44.2983	-0.284044	0.372961	-0.76159	0.446305	0.999182
ELP2	YGR200C	chrVII	-	151.249	0.118678	0.211357	0.561506	0.574453	0.998763		151.249	0.0805599	0.211309	0.381243	0.703023	0.999182
PRP6	YBR055C	chrII	-	55.3475	0.118578	0.339365	0.349411	0.726781	0.998763		55.3475	0.361546	0.334091	1.08218	0.279172	0.999182
SEC4	YFL005W	chrVI	+	333.593	0.11809	0.152538	0.774168	0.438831	0.986092		333.593	-0.0119448	0.153149	-0.0779942	0.937833	0.999182
RKM5	YLR137W	chrXII	+	85.342	0.118059	0.270956	0.435714	0.663045	0.998763		85.342	-0.0631004	0.273109	-0.231044	0.81728	0.999182
EDC1	YGL222C	chrVII	-	46.7317	0.117928	0.37141	0.317514	0.750853	0.998763		46.7317	-0.338038	0.380254	-0.888979	0.374014	0.999182
COM2	YER130C	chrV	-	145.797	0.117791	0.219096	0.53762	0.590839	0.998763		145.797	-0.0448446	0.220442	-0.203431	0.838798	0.999182
KRE6	YPR159W	chrXVI	+	294.41	0.117522	0.164526	0.714309	0.475036	0.990992		294.41	0.10714	0.164289	0.652142	0.51431	0.999182
TRF5	YNL299W	chrXIV	+	36.2182	0.117446	0.468331	0.250775	0.801988	0.998763		36.2182	0.366867	0.462356	0.793473	0.427502	0.999182
AIM4	YBR194W	chrII	+	45.2156	0.117425	0.367055	0.31991	0.749036	0.998763		45.2156	-0.0739956	0.37028	-0.199837	0.841608	0.999182
RPS4B	YHR203C	chrVIII	-	3628.56	0.117391	0.0924309	1.27004	0.204069	0.888929		3628.56	0.29511	0.0922009	3.20073	0.00137081	0.105032
MLF3	YNL074C	chrXIV	-	84.9127	0.117043	0.293123	0.399296	0.689675	0.998763		84.9127	0.062408	0.293293	0.212784	0.831496	0.999182
SNF2	YOR290C	chrXV	-	116.57	0.117004	0.236185	0.495391	0.620324	0.998763		116.57	0.11362	0.235686	0.482079	0.62975	0.999182
CDC26	YFR036W	chrVI	+	29.3878	0.116979	0.461088	0.253701	0.799726	0.998763		29.3878	0.221995	0.457286	0.485463	0.627348	0.999182
GAG1	YLR407W	chrXII	+	99.9433	0.116586	0.272304	0.428147	0.668544	0.998763		99.9433	0.204365	0.270625	0.755161	0.450152	0.999182
NAT1	YDL040C	chrIV	-	187.121	0.116461	0.201433	0.578162	0.563155	0.998763		187.121	0.196609	0.20029	0.98162	0.326287	0.999182
LSM1	YJL124C	chrX	-	315.082	0.11584	0.157506	0.735466	0.462056	0.986476		315.082	-0.00902326	0.158095	-0.0570749	0.954486	0.999182
HCR1	YLR192C	chrXII	-	369.878	0.11576	0.151114	0.76604	0.443652	0.986476		369.878	0.0970843	0.150961	0.64311	0.520153	0.999182
MGR2	YPL098C	chrXVI	-	169.958	0.115751	0.214907	0.538609	0.590157	0.998763		169.958	0.0137826	0.215483	0.0639612	0.949001	0.999182
UPF3	YGR072W	chrVII	+	66.3261	0.11572	0.301513	0.383797	0.701129	0.998763		66.3261	-0.093221	0.304511	-0.306133	0.759503	0.999182
MYO5	YMR109W	chrXIII	+	116.108	0.115648	0.249814	0.462936	0.64341	0.998763		116.108	-0.100836	0.251972	-0.400188	0.689018	0.999182
ERP3	YDL018C	chrIV	-	50.3581	0.11557	0.361865	0.319372	0.749444	0.998763		50.3581	0.162191	0.360151	0.450342	0.652464	0.999182
GIR2	YDR152W	chrIV	+	193.402	0.115568	0.196393	0.588454	0.556227	0.998763		193.402	0.120613	0.19595	0.615529	0.538205	0.999182
MCY1	YGR012W	chrVII	+	65.4204	0.115342	0.311383	0.370419	0.711071	0.998763		65.4204	-0.0821531	0.314119	-0.261535	0.79368	0.999182
NA	YOL097W-A	chrXV	+	23.4178	0.115293	0.521904	0.220908	0.825164	0.998763		23.4178	0.648402	0.505646	1.28232	0.199729	0.999182
KTR5	YNL029C	chrXIV	-	51.8213	0.1152	0.352886	0.326451	0.744083	0.998763		51.8213	-0.213886	0.358615	-0.596422	0.550893	0.999182
CBS2	YDR197W	chrIV	+	37.8601	0.115109	0.403759	0.285093	0.775573	0.998763		37.8601	0.122762	0.402611	0.304916	0.76043	0.999182
NA	YMR262W	chrXIII	+	57.0677	0.115089	0.32709	0.351856	0.724946	0.998763		57.0677	-0.0438061	0.329329	-0.133016	0.894181	0.999182
TOD6	YBL054W	chrII	+	160.394	0.114898	0.208395	0.551346	0.581397	0.998763		160.394	0.275925	0.206272	1.33768	0.181002	0.998565
DLS1	YJL065C	chrX	-	163.307	0.114809	0.200753	0.571893	0.567395	0.998763		163.307	-0.174758	0.20349	-0.858805	0.390448	0.999182
RSA4	YCR072C	chrIII	-	116.722	0.114803	0.26405	0.434779	0.663723	0.998763		116.722	0.361706	0.260784	1.38699	0.165443	0.979795
FIT1	YDR534C	chrIV	-	36.0629	0.11433	1.30335	0.0877196	0.9301	0.998763		36.0629	0.202092	1.30237	0.155173	0.876685	0.999182
NA	YER034W	chrV	+	106.865	0.114138	0.270477	0.421989	0.673033	0.998763		106.865	-0.0426755	0.271892	-0.156958	0.875278	0.999182
AQY3	YFL054C	chrVI	-	52.8688	0.114065	0.34948	0.326384	0.744134	0.998763		52.8688	-0.189204	0.354626	-0.533531	0.593666	0.999182
PAU6	YNR076W	chrXIV	+	65.8605	0.113854	0.317915	0.358128	0.720248	0.998763		65.8605	-0.254186	0.323613	-0.785463	0.432182	0.999182
SWC7	YLR385C	chrXII	-	115.197	0.113826	0.254155	0.44786	0.654254	0.998763		115.197	0.0864575	0.25397	0.340424	0.733537	0.999182
ROG3	YFR022W	chrVI	+	28.386	0.113743	0.462646	0.245854	0.805795	0.998763		28.386	0.330044	0.455812	0.724079	0.469017	0.999182
SPT3	YDR392W	chrIV	+	58.8862	0.113699	0.336813	0.337573	0.735685	0.998763		58.8862	-0.00239605	0.338136	-0.00708607	0.994346	0.999182
DIP2	YLR129W	chrXII	+	191.762	0.113396	0.189877	0.597206	0.55037	0.998763		191.762	0.0564475	0.190018	0.297064	0.766418	0.999182
CLA4	YNL298W	chrXIV	+	73.4411	0.113107	0.291595	0.387891	0.698097	0.998763		73.4411	0.016858	0.292491	0.0576359	0.954039	0.999182
TEF1	YPR080W	chrXVI	+	14301.3	0.112977	0.0852815	1.32475	0.185254	0.865862		14301.3	0.257934	0.0852273	3.02642	0.00247465	0.153886
TAH1	YCR060W	chrIII	+	184.127	0.112877	0.197516	0.571483	0.567672	0.998763		184.127	0.100974	0.197217	0.511993	0.608656	0.999182
RPC82	YPR190C	chrXVI	-	127.871	0.112752	0.239397	0.470982	0.637654	0.998763		127.871	0.343167	0.236298	1.45226	0.14643	0.960693
RMT2	YDR465C	chrIV	-	209.732	0.112724	0.188962	0.596544	0.550812	0.998763		209.732	-0.0958684	0.19047	-0.503326	0.614735	0.999182
PEX10	YDR265W	chrIV	+	48.8875	0.112718	0.358946	0.314025	0.753502	0.998763		48.8875	0.352025	0.353378	0.996172	0.319167	0.999182
NA	YPR195C	chrXVI	-	43.0865	0.112607	0.394776	0.285242	0.775458	0.998763		43.0865	0.125322	0.393634	0.318371	0.750203	0.999182
TVP15	YDR100W	chrIV	+	721.856	0.112295	0.126347	0.888784	0.374119	0.977915		721.856	-0.111695	0.127062	-0.879062	0.379368	0.999182
EXP1	YDL121C	chrIV	-	247.879	0.112098	0.181678	0.617016	0.537224	0.998763		247.879	0.0852801	0.181551	0.469731	0.638547	0.999182
END3	YNL084C	chrXIV	-	120.384	0.112044	0.232599	0.481703	0.630017	0.998763		120.384	0.0677607	0.232624	0.291289	0.77083	0.999182
ATG27	YJL178C	chrX	-	153.713	0.11175	0.211315	0.528831	0.596923	0.998763		153.713	-0.000231496	0.212078	-0.00109156	0.999129	0.999741
RPN6	YDL097C	chrIV	-	254.996	0.111731	0.172144	0.649057	0.516301	0.998763		254.996	-0.208473	0.174452	-1.19502	0.232081	0.999182
NA	YHR050W-A	chrVIII	+	250.379	0.111689	0.18328	0.60939	0.542266	0.998763		250.379	0.229174	0.182057	1.2588	0.208103	0.999182
PWP1	YLR196W	chrXII	+	321.51	0.111678	0.156802	0.712225	0.476325	0.990992		321.51	0.060184	0.156862	0.383674	0.70122	0.999182
SNR75	YNCM0014W	chrXIII	+	252.873	0.111346	0.170103	0.654579	0.512739	0.998763		252.873	-0.177949	0.172189	-1.03345	0.301392	0.999182
PDR16	YNL231C	chrXIV	-	225.916	0.11128	0.179141	0.621188	0.534476	0.998763		225.916	0.0841894	0.179005	0.470319	0.638127	0.999182
LAM6	YLR072W	chrXII	+	45.9519	0.11123	0.361682	0.307535	0.758436	0.998763		45.9519	-0.256069	0.368864	-0.694209	0.487551	0.999182
ARE1	YCR048W	chrIII	+	99.5316	0.111198	0.257965	0.431061	0.666424	0.998763		99.5316	-0.0145085	0.259122	-0.0559908	0.955349	0.999182
PRS5	YOL061W	chrXV	+	269.599	0.111062	0.168919	0.657486	0.510869	0.998763		269.599	0.113478	0.168569	0.673183	0.500831	0.999182
RAD57	YDR004W	chrIV	+	40.775	0.111058	0.396084	0.28039	0.779179	0.998763		40.775	-0.342975	0.405559	-0.845683	0.397729	0.999182
ELO3	YLR372W	chrXII	+	558.532	0.110872	0.153832	0.720738	0.471071	0.989477		558.532	0.204591	0.153271	1.33483	0.181932	0.999182
NA	YBR224W	chrII	+	11.9236	0.110774	0.707014	0.156679	0.875498	0.998763		11.9236	0.474017	0.69037	0.686614	0.492326	0.999182
SEC9	YGR009C	chrVII	-	77.3267	0.110678	0.281106	0.393724	0.693785	0.998763		77.3267	-0.345592	0.288175	-1.19924	0.230433	0.999182
COS9	YKL219W	chrXI	+	46.2405	0.110491	0.359114	0.307677	0.758328	0.998763		46.2405	-0.219587	0.36545	-0.600868	0.547928	0.999182
ERG1	YGR175C	chrVII	-	622.968	0.110447	0.139983	0.789003	0.43011	0.984362		622.968	0.192487	0.139477	1.38006	0.167568	0.982306
PNT1	YOR266W	chrXV	+	61.375	0.110275	0.324566	0.339761	0.734037	0.998763		61.375	0.0522994	0.324845	0.160998	0.872095	0.999182
GAT2	YMR136W	chrXIII	+	266.554	0.11014	0.180565	0.609974	0.541879	0.998763		266.554	-0.152694	0.182222	-0.837953	0.402057	0.999182
MSC3	YLR219W	chrXII	+	53.8499	0.109923	0.337862	0.32535	0.744917	0.998763		53.8499	-0.171386	0.342627	-0.500212	0.616926	0.999182
UBA3	YPR066W	chrXVI	+	50.3014	0.109876	0.363874	0.301962	0.762681	0.998763		50.3014	-0.155717	0.3683	-0.422798	0.672443	0.999182
APM1	YPL259C	chrXVI	-	76.9699	0.109846	0.289918	0.378886	0.704773	0.998763		76.9699	0.0851089	0.289639	0.293845	0.768877	0.999182
MRX21	YPR011C	chrXVI	-	85.7949	0.109828	0.273587	0.401437	0.688098	0.998763		85.7949	0.0991824	0.27311	0.363159	0.716486	0.999182
AIR2	YDL175C	chrIV	-	41.8133	0.109666	0.380693	0.28807	0.773293	0.998763		41.8133	-0.0117756	0.382471	-0.0307883	0.975438	0.999182
BOI1	YBL085W	chrII	+	81.393	0.109617	0.277121	0.395558	0.692431	0.998763		81.393	0.0176869	0.277904	0.0636438	0.949254	0.999182
COX7	YMR256C	chrXIII	-	180.915	0.109476	0.206553	0.530017	0.5961	0.998763		180.915	-0.0462617	0.207636	-0.222802	0.82369	0.999182
NTH2	YBR001C	chrII	-	50.9425	0.109404	0.369533	0.296061	0.767183	0.998763		50.9425	-0.210813	0.374909	-0.562305	0.573909	0.999182
SPO73	YER046W	chrV	+	64.5753	0.10938	0.34255	0.319312	0.74949	0.998763		64.5753	-0.0595866	0.344595	-0.172918	0.862716	0.999182
APA1	YCL050C	chrIII	-	294.588	0.109287	0.16793	0.650791	0.515182	0.998763		294.588	-0.149383	0.169512	-0.881252	0.378181	0.999182
DCP2	YNL118C	chrXIV	-	105.609	0.109189	0.268333	0.406914	0.684071	0.998763		105.609	0.127977	0.267568	0.478297	0.632439	0.999182
MFA1	YDR461W	chrIV	+	53.2437	0.10917	0.351243	0.310812	0.755944	0.998763		53.2437	0.117961	0.350279	0.336762	0.736296	0.999182
NGK1	YLR446W	chrXII	+	14.9427	0.109103	0.643264	0.169608	0.865318	0.998763		14.9427	-0.183254	0.652728	-0.280752	0.778901	0.999182
SCO2	YBR024W	chrII	+	33.2067	0.108999	0.417449	0.261108	0.79401	0.998763		33.2067	-0.782787	0.441941	-1.77125	0.0765195	0.810952
UIP4	YPL186C	chrXVI	-	19.5791	0.108825	0.53488	0.203458	0.838777	0.998763		19.5791	-0.385945	0.551009	-0.700434	0.483656	0.999182
RHO5	YNL180C	chrXIV	-	101.987	0.108792	0.248228	0.438276	0.661186	0.998763		101.987	0.0716901	0.248156	0.288892	0.772664	0.999182
IDP2	YLR174W	chrXII	+	70.5979	0.108694	0.310959	0.349546	0.72668	0.998763		70.5979	-0.361762	0.318213	-1.13686	0.255599	0.999182
PEX28	YHR150W	chrVIII	+	28.6634	0.108223	0.47851	0.226168	0.821071	0.998763		28.6634	0.160026	0.4761	0.336119	0.736781	0.999182
YRM1	YOR172W	chrXV	+	49.129	0.108064	0.351474	0.30746	0.758494	0.998763		49.129	0.0215675	0.352387	0.061204	0.951197	0.999182
SCW10	YMR305C	chrXIII	-	684.567	0.107755	0.123609	0.871742	0.383349	0.979867		684.567	0.330122	0.122518	2.69447	0.00705004	0.278431
SMY1	YKL079W	chrXI	+	88.8139	0.107666	0.271677	0.396301	0.691883	0.998763		88.8139	-0.0665265	0.273636	-0.24312	0.807912	0.999182
YMC1	YPR058W	chrXVI	+	164.325	0.107614	0.21195	0.507735	0.611639	0.998763		164.325	0.221263	0.21038	1.05173	0.292922	0.999182
GTR1	YML121W	chrXIII	+	85.964	0.107599	0.269407	0.399392	0.689604	0.998763		85.964	-0.200652	0.273596	-0.73339	0.46332	0.999182
POF1	YCL047C	chrIII	-	39.8252	0.107349	0.397095	0.270337	0.786901	0.998763		39.8252	-0.420006	0.408616	-1.02788	0.304009	0.999182
YEF1	YEL041W	chrV	+	17.5322	0.107222	0.566827	0.189162	0.849966	0.998763		17.5322	-0.434319	0.585697	-0.741542	0.458365	0.999182
ASK10	YGR097W	chrVII	+	244.246	0.107108	0.171662	0.623945	0.532664	0.998763		244.246	-0.154125	0.173554	-0.888053	0.374512	0.999182
PBY1	YBR094W	chrII	+	64.3127	0.10709	0.329924	0.324591	0.74549	0.998763		64.3127	-0.115656	0.332994	-0.347322	0.72835	0.999182
DCW1	YKL046C	chrXI	-	197.518	0.106611	0.193638	0.550566	0.581931	0.998763		197.518	0.0181302	0.194065	0.0934236	0.925567	0.999182
GRH1	YDR517W	chrIV	+	130.575	0.106377	0.23164	0.459235	0.646066	0.998763		130.575	0.106396	0.231143	0.460302	0.6453	0.999182
NOP12	YOL041C	chrXV	-	250.601	0.106245	0.176248	0.602813	0.546633	0.998763		250.601	0.223533	0.17498	1.27748	0.201433	0.999182
SEC12	YNR026C	chrXIV	-	77.0721	0.106226	0.310374	0.342251	0.732162	0.998763		77.0721	0.0976038	0.30987	0.314983	0.752774	0.999182
HRD3	YLR207W	chrXII	+	44.8897	0.106142	0.369961	0.286901	0.774188	0.998763		44.8897	-0.188995	0.375502	-0.503313	0.614744	0.999182
SMT3	YDR510W	chrIV	+	543.185	0.106121	0.130374	0.813976	0.415659	0.984362		543.185	0.178978	0.129798	1.3789	0.167926	0.983324
ECM3	YOR092W	chrXV	+	76.1331	0.105917	0.290768	0.364266	0.715659	0.998763		76.1331	-0.22669	0.295557	-0.76699	0.443087	0.999182
PKP1	YIL042C	chrIX	-	37.9955	0.105806	0.401886	0.263274	0.792339	0.998763		37.9955	-0.0315967	0.404113	-0.0781878	0.937679	0.999182
NA	YBL039C-A	chrII	-	532.398	0.105695	0.131342	0.804725	0.420978	0.984362		532.398	0.110198	0.131102	0.840556	0.400597	0.999182
ISA2	YPR067W	chrXVI	+	56.9483	0.105578	0.340914	0.30969	0.756797	0.998763		56.9483	-0.161232	0.345114	-0.467185	0.640367	0.999182
UBA4	YHR111W	chrVIII	+	80.8346	0.105322	0.2773	0.379812	0.704085	0.998763		80.8346	-0.0209245	0.27864	-0.0750953	0.940139	0.999182
UBC13	YDR092W	chrIV	+	186.998	0.105246	0.197324	0.533367	0.59378	0.998763		186.998	0.0663268	0.197288	0.336193	0.736725	0.999182
NAP1	YKR048C	chrXI	-	445.682	0.105113	0.141025	0.745351	0.45606	0.986476		445.682	-0.0189415	0.141486	-0.133875	0.893501	0.999182
ENT3	YJR125C	chrX	-	89.7832	0.104983	0.262618	0.399756	0.689336	0.998763		89.7832	-0.175875	0.266297	-0.660448	0.508966	0.999182
IES3	YLR052W	chrXII	+	96.7925	0.104575	0.257954	0.405402	0.685182	0.998763		96.7925	-0.0244788	0.259196	-0.0944413	0.924759	0.999182
BDF1	YLR399C	chrXII	-	94.0176	0.104492	0.26294	0.397399	0.691073	0.998763		94.0176	-0.00786709	0.263951	-0.0298051	0.976222	0.999182
URA7	YBL039C	chrII	-	532.902	0.104371	0.131252	0.795192	0.426502	0.984362		532.902	0.107445	0.131019	0.820074	0.412174	0.999182
KIP3	YGL216W	chrVII	+	48.2824	0.103993	0.372554	0.279135	0.780141	0.998763		48.2824	0.270439	0.368506	0.733879	0.463022	0.999182
HOS2	YGL194C	chrVII	-	41.2114	0.103966	0.382066	0.272116	0.785533	0.998763		41.2114	0.0953658	0.381313	0.250098	0.802511	0.999182
IAI11	YBL059W	chrII	+	33.2761	0.103697	0.445502	0.232765	0.815944	0.998763		33.2761	0.139138	0.44365	0.313622	0.753808	0.999182
SNM1	YDR478W	chrIV	+	35.8697	0.103558	0.416478	0.248651	0.80363	0.998763		35.8697	0.322272	0.410397	0.785268	0.432297	0.999182
RSA1	YPL193W	chrXVI	+	79.2641	0.103514	0.281667	0.367503	0.713244	0.998763		79.2641	-0.0368102	0.283239	-0.129962	0.896597	0.999182
ECM30	YLR436C	chrXII	-	73.1215	0.103341	0.327854	0.315205	0.752606	0.998763		73.1215	-0.00273332	0.328797	-0.0083131	0.993367	0.999182
SWA2	YDR320C	chrIV	-	47.4967	0.103275	0.356206	0.289931	0.771869	0.998763		47.4967	0.114916	0.355085	0.323629	0.746219	0.999182
LSM3	YLR438C-A	chrXII	-	304.27	0.102977	0.159202	0.646837	0.517737	0.998763		304.27	0.177132	0.158353	1.11859	0.263317	0.999182
NA	YDL124W	chrIV	+	180.637	0.102873	0.192937	0.533191	0.593901	0.998763		180.637	-0.641965	0.200801	-3.19702	0.00138857	0.105032
IRC20	YLR247C	chrXII	-	81.1719	0.102789	0.291918	0.352117	0.72475	0.998763		81.1719	-0.142744	0.29502	-0.483845	0.628496	0.999182
NA	YOR318C	chrXV	-	18.4927	0.102654	0.574704	0.17862	0.858236	0.998763		18.4927	0.313436	0.566389	0.553393	0.579995	0.999182
KSP1	YHR082C	chrVIII	-	110.869	0.102534	0.251471	0.407738	0.683466	0.998763		110.869	-0.0617996	0.253038	-0.244231	0.807052	0.999182
MSN1	YOL116W	chrXV	+	34.4143	0.102216	0.419678	0.243559	0.807572	0.998763		34.4143	0.272933	0.414531	0.658414	0.510272	0.999182
CDC12	YHR107C	chrVIII	-	152.094	0.101986	0.209731	0.486271	0.626775	0.998763		152.094	-0.11216	0.211675	-0.52987	0.596202	0.999182
MSS1	YMR023C	chrXIII	-	29.6219	0.101881	0.449338	0.226737	0.820628	0.998763		29.6219	0.127629	0.447537	0.28518	0.775506	0.999182
LDB18	YLL049W	chrXII	+	74.8621	0.101694	0.301288	0.337531	0.735717	0.998763		74.8621	-0.00130234	0.302245	-0.00430888	0.996562	0.999182
RRT13	YER066W	chrV	+	24.8854	0.101551	0.484617	0.209549	0.834019	0.998763		24.8854	-0.526456	0.503118	-1.04639	0.295383	0.999182
RSC9	YML127W	chrXIII	+	60.6469	0.101444	0.320152	0.316863	0.751348	0.998763		60.6469	0.127232	0.318916	0.398951	0.689929	0.999182
UBC7	YMR022W	chrXIII	+	134.501	0.101236	0.221875	0.456274	0.648193	0.998763		134.501	-0.0642684	0.223356	-0.28774	0.773546	0.999182
NA	YDR222W	chrIV	+	66.0714	0.101137	0.310368	0.325862	0.744529	0.998763		66.0714	-0.387761	0.318522	-1.21738	0.223461	0.999182
CDC50	YCR094W	chrIII	+	81.4526	0.101128	0.294051	0.343912	0.730912	0.998763		81.4526	0.0123807	0.294738	0.0420058	0.966494	0.999182
PYK2	YOR347C	chrXV	-	45.1027	0.100924	0.3561	0.283416	0.776858	0.998763		45.1027	-0.604625	0.37206	-1.62507	0.104147	0.880786
NAT3	YPR131C	chrXVI	-	87.2133	0.100756	0.280494	0.359209	0.719438	0.998763		87.2133	-0.180794	0.284055	-0.636476	0.524466	0.999182
FUN19	YAL034C	chrI	-	54.5549	0.100557	0.33243	0.30249	0.762279	0.998763		54.5549	-0.602517	0.346508	-1.73883	0.0820653	0.82693
HRR25	YPL204W	chrXVI	+	235.356	0.100418	0.177355	0.566198	0.571259	0.998763		235.356	0.0678786	0.177269	0.382914	0.701784	0.999182
YFH7	YFR007W	chrVI	+	30.3427	0.100285	0.441805	0.22699	0.820432	0.998763		30.3427	-0.451497	0.456171	-0.989754	0.322295	0.999182
TAF7	YMR227C	chrXIII	-	49.9734	0.100157	0.34787	0.287914	0.773413	0.998763		49.9734	-0.0381667	0.349853	-0.109094	0.913128	0.999182
SLN1	YIL147C	chrIX	-	82.4153	0.100074	0.273351	0.366101	0.71429	0.998763		82.4153	-0.119155	0.276189	-0.431424	0.66616	0.999182
EBP2	YKL172W	chrXI	+	307.029	0.0999908	0.161154	0.620466	0.534951	0.998763		307.029	0.0529937	0.161184	0.328778	0.742324	0.999182
GIC2	YDR309C	chrIV	-	91.8605	0.0999638	0.26736	0.373892	0.708485	0.998763		91.8605	0.030494	0.267753	0.113888	0.909326	0.999182
NA	YIL108W	chrIX	+	98.7637	0.0999308	0.253481	0.394234	0.693408	0.998763		98.7637	-0.194465	0.25715	-0.756231	0.449511	0.999182
MDS3	YGL197W	chrVII	+	62.554	0.0998516	0.314058	0.31794	0.75053	0.998763		62.554	-0.0636355	0.316275	-0.201203	0.84054	0.999182
NA	YPR170W-A	chrXVI	+	547.764	0.0997991	0.152702	0.653555	0.513399	0.998763		547.764	0.327084	0.151575	2.1579	0.0309354	0.56278
PPZ1	YML016C	chrXIII	-	216.218	0.0997799	0.198871	0.501732	0.615856	0.998763		216.218	-0.115869	0.200322	-0.578414	0.562985	0.999182
GRX5	YPL059W	chrXVI	+	162.492	0.0996466	0.218149	0.456782	0.647828	0.998763		162.492	-0.240424	0.221232	-1.08675	0.277146	0.999182
MPS1	YDL028C	chrIV	-	41.9108	0.0994754	0.379544	0.262092	0.793251	0.998763		41.9108	-0.152541	0.384332	-0.396898	0.691442	0.999182
[truncated: 3,722 more rows]
